# Supplementary material for: Poly(ethylene) glycols and mechanochemistry for the preparation of bioactive 3,5-disubstituted hydantoins
Source: Royal Society of Chemistry journal article supplement (doi:10.1039/c6ra03222b), 2016-01-01

## SUPPORTING INFORMATION

### Poly(ethylene) glycols and mechanochemistry for the preparation of bioactive 3,5-disubstituted hydantoins.

Laure Konnert, Myriam Dimassi, Lori Gonnet, Frédéric Lamaty, Jean Martinez and Evelina Colacino\*

Université Montpellier, Institut des Biomolécules Max Mousseron, UMR 5247 CNRS – UM - ENSCM, Place E. Bataillon, Campus Triolet, cc 1703, 34095 Montpellier (France).

\*e-mail: [evelina.colacino@umontpellier.fr](mailto:evelina.colacino@umontpellier.fr)

**General Remarks and Experimental Procedures** S1

**Table S1.** Screening of mechanochemical parameters to prepare **2** by Method A. S2

**Table S2.** Synthesis of hydantoins. Comparison between mechanochemical (BM) and solution methods. S2

Chiral HPLC Analyses for compound **4** (Methods A and B, with and without MeO-PEG-2000-OMe) (Table 4) S3-S5

<sup>1</sup>H NMR, <sup>13</sup>C NMR and IR spectra of compounds **2**, **4-19**, **21**, **24** (Table 2), and **25-26** (Scheme 2). S6-S68

### General Remarks and Experimental Procedures

All reagents were commercially available. All the starting  $\alpha$ -amino esters were in the *L*-form. 5-Phenyl hydantoin was prepared as previously described.<sup>1</sup> NMR spectra were recorded at room temperature with the appropriate deuterated solvent (CDCl<sub>3</sub> or *d*<sub>6</sub>-DMSO). Chemical shifts ( $\delta$ ) of <sup>1</sup>H NMR and <sup>13</sup>C NMR spectra are reported in ppm relative to residual solvent signals (CHCl<sub>3</sub> in CDCl<sub>3</sub>:  $\delta$  = 7.26 ppm for <sup>1</sup>H and CDCl<sub>3</sub>:  $\delta$  = 77.04 ppm for <sup>13</sup>C NMR); *J* values are given in Hz. <sup>1</sup>H and <sup>13</sup>C NMR spectra were registered at 300 MHz or 400 MHz, the samples were prepared by dissolving 15 mg of hydantoin in 0.7 mL of deuterated solvent. <sup>1</sup>H and <sup>13</sup>C NMR were recorded using 32 and 4096 scans respectively. The identity of analytically pure final products was assessed by comparison of their <sup>1</sup>H NMR data previously described in the literature and by their fragmentation in LC/MS. HRMS measurements were performed on a TOF mass analyser. Analytical high performance liquid chromatography (HPLC) was performed with a UV-detector at 214 nm using a CHROMOLITH RP18 column (50 x 4.6 mm), flow 5 mL/min, linear gradient CH<sub>3</sub>CN in water 0-100% (+ 0.1% TFA) in 3 min. LC-MS analyses were performed by HPLC, column Onyx C<sub>18</sub>, (25 x 4.6 mm), flow 3 mL/min linear gradient CH<sub>3</sub>CN in water 0-100% (+ 0.1% HCO<sub>2</sub>H) in 2.5 min. Melting points were measured on a Büchi Melting Point 510 apparatus and are uncorrected. Infrared spectra were recorded on a Nexus<sup>TM</sup> E.S.P. (Thermo Nicolet, USA) FT-IR spectrometer equipped with high pressure diamond cell. The ball-milling experiments were performed in a MM200 vibrational ball mill (Retsch GmbH, Haan, Germany) using 5 mL stainless steel jar (2 stainless steel balls, 5 mm Ø), a PM100 planetary mill (Retsch GmbH, Haan, Germany) using a 12 mL stainless steel jar (25 or 50 stainless steel balls, 5 mm Ø) or a Pulverisette 7 Premium (Fritsch GmbH, Idar-Oberstein, Germany) using a 20 mL stainless steel jar (40 stainless steel

balls, 5 mm Ø). All compounds displayed identical spectral data compared to literature. Enantiomeric excess (*e.e.*) and ratio (*e.r.*) were measured using a Beckman Coulter System Gold 126 Solvent Module HPLC machine and Beckman Coulter System Gold 168 Detector. Column: direct phase CHIRACEL OD-RH (0.46 x 25 cm) for compound **4**, using *n*-hexanes and 2-propanol as solvents (ratio 90:10 v/v, Flow: 1 mL/min,  $\lambda = 214$  nm).

**Table S1. Screening of mechanochemical parameters to prepare **2** by Method A.**

| Ball-Mill | Jar Material    | Frequency (Hz) / Rotation speed (rpm) | Time (min.) | Yield (%) |
|-----------|-----------------|---------------------------------------|-------------|-----------|
| PBM       | Stainless steel | 450 rpm                               | 120         | 76        |
| VBM       | Stainless steel | 30 Hz                                 | 120         | 75        |
| VBM       | WC              | 30 Hz                                 | 120         | 74        |

**Table S2. Synthesis of hydantoins. Comparison between mechanochemical (BM) and solution methods.**

| Product   | Yield (%)                |                                   |
|-----------|--------------------------|-----------------------------------|
|           | BM (A or B) <sup>a</sup> | In Solution <sup>b</sup>          |
| <b>2</b>  | 84, B                    | 82 <sup>2</sup>                   |
| <b>11</b> | 79, A                    | 94 <sup>3</sup>                   |
| <b>12</b> | 40, B                    | 70 <sup>4</sup> , 60 <sup>5</sup> |
| <b>13</b> | 75, B                    | 29 <sup>6</sup>                   |
| <b>14</b> | 58, B                    | 54 <sup>6</sup>                   |
| <b>16</b> | 65, B                    | 92 <sup>7</sup>                   |
| <b>17</b> | 25, B                    | 68 <sup>8</sup>                   |
| <b>18</b> | 85, A                    | 84 <sup>2</sup>                   |

<sup>a</sup> For the same compound, the method giving the better yield was reported. Method A:  $\alpha$ -amino ester (1 equiv.), R<sup>2</sup>NCO (3 equiv.), K<sub>2</sub>CO<sub>3</sub> (3 equiv.), 30 Hz, 120 min; Method B: (*step 1*)  $\alpha$ -amino ester (1 equiv.), CDI (1.3 equiv.), 450 rpm, 40 min.; (*step 2*) R<sub>2</sub>NH<sub>2</sub> (1.6 equiv.), K<sub>2</sub>CO<sub>3</sub> (3.6 equiv.), 450 rpm, 120 min.; <sup>b</sup> For some compounds no comparison with solution procedure is possible: compounds **4-6**, **9** and **15** are hitherto unknown; compounds **7** and **8** are commercially available (509€/g) but the preparation in solution was never reported in the literature.

## REFERENCES

- (1) Konnert, L.; Reneaud, B.; de Figueiredo, R. M.; Campagne, J.-M.; Lamaty, F.; Martinez, J.; Colacino, E. *J. Org. Chem.* **2014**, *79*, 10132-10142.
- (2) Dumbris, S. M.; Di'az, D. J.; McElwee-White, L. *J. Org. Chem.* **2009**, *74*, 8862-8865.
- (3) Chen, Z.; Sun, Y. *Ind. Eng. Chem. Res.* **2006**, *45*, 2634-2640.
- (4) Dudley, K. H.; Bius, D. L. *J. Heterocycl. Chem.* **1973**, *10*, 173-80.
- (5) Liu, H.; Yang, Z.; Pan, Z. *Organic Letters* **2014**, *16*, 5902-5905.
- (6) Dewitt, S. H. H.; Kiely, J. S.; Pavia, M. R.; Schroeder, M. C.; Stankovic, C. J.; Warner-Lambert Co., USA . 1998, p 67 pp., Cont.-in-part of U.S. Ser.5,612,002.
- (7) Xi, G.; Xiu, Y.; Wang, L.; Liu, X. *J. Appl. Polym. Sci.* **2015**, *132*, 41824/1-41824/7
- (8) Trisovic, N.; Timic, T.; Divljakovic, J.; Rogan, J.; Poleti, D.; Savic, M. M.; Uscumlic, G. *Monatsh. Chem.* **2012**, *143*, 1451-1457.

### Chiral HPLC analyses of compound 4 prepared with Method B (Table 4):

Reaction performed from H-L-Leu-OMe\*HCl, without MeO-PEG-2000-OMe

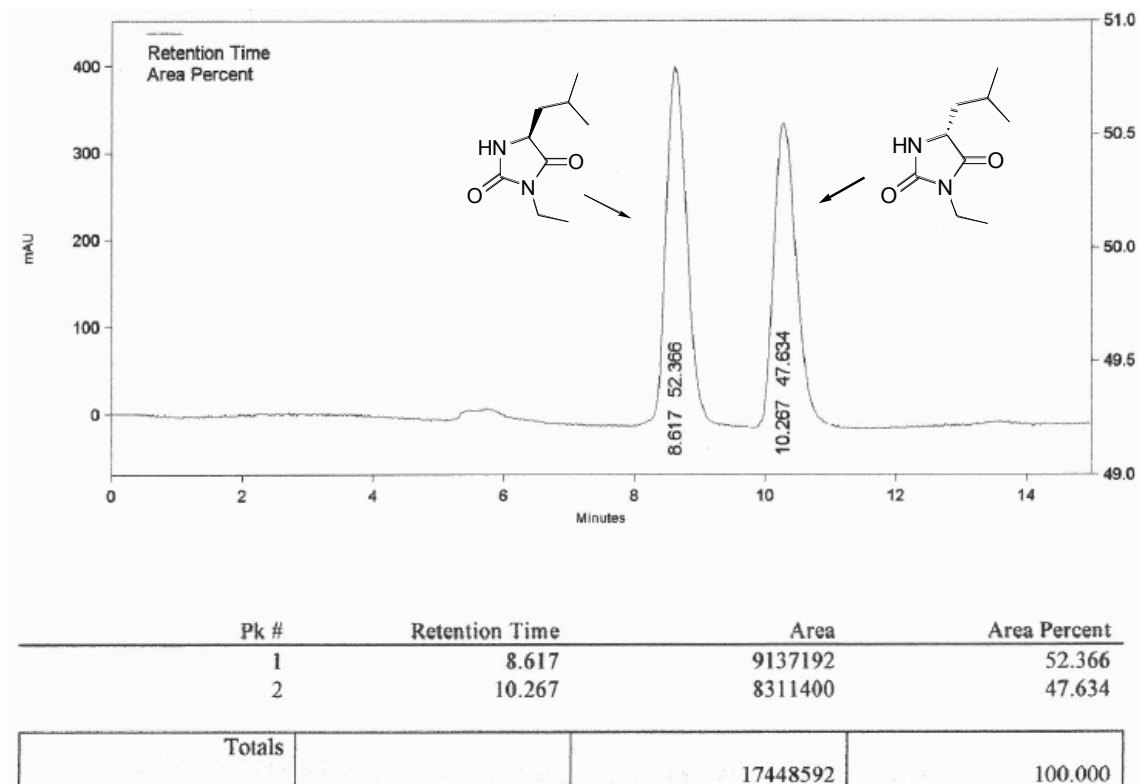

Reaction performed from H-D-Leu-OMe\*HCl, without MeO-PEG-2000-OMe

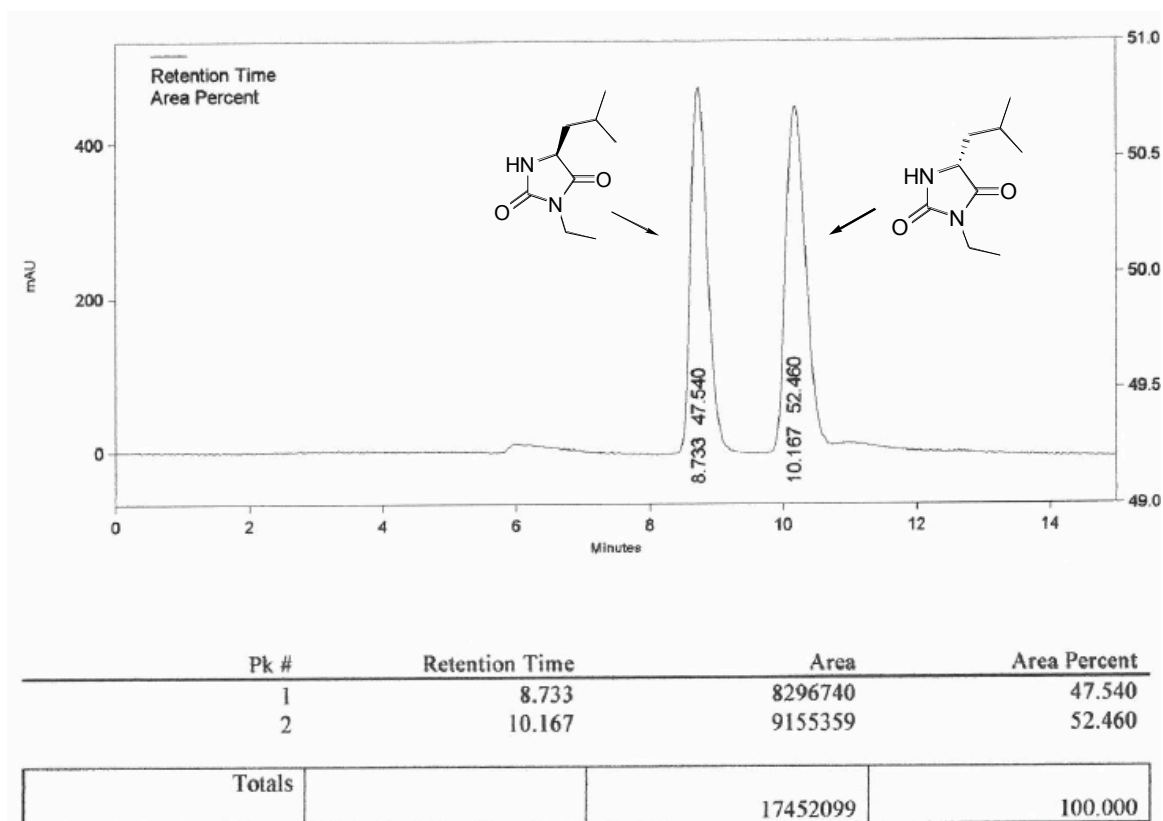

Reaction performed from H-L-Leu-OMe\*HCl, with MeO-PEG-2000-OMe

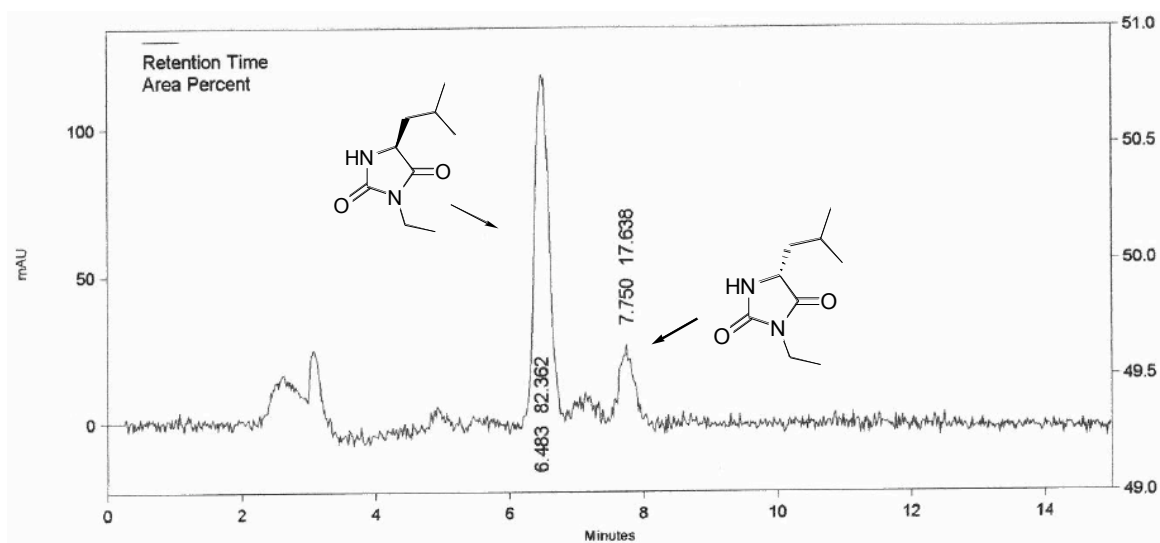

| Pk #   | Retention Time | Area    | Area Percent |
|--------|----------------|---------|--------------|
| 1      | 6.483          | 1819680 | 82.362       |
| 2      | 7.750          | 389687  | 17.638       |
| Totals |                | 2209367 | 100.000      |

### Chiral HPLC analyses of compound 4 prepared with method A (Table 4):

Reaction performed from H-L-Leu-OMe\*HCl, without MeO-PEG-2000-OMe

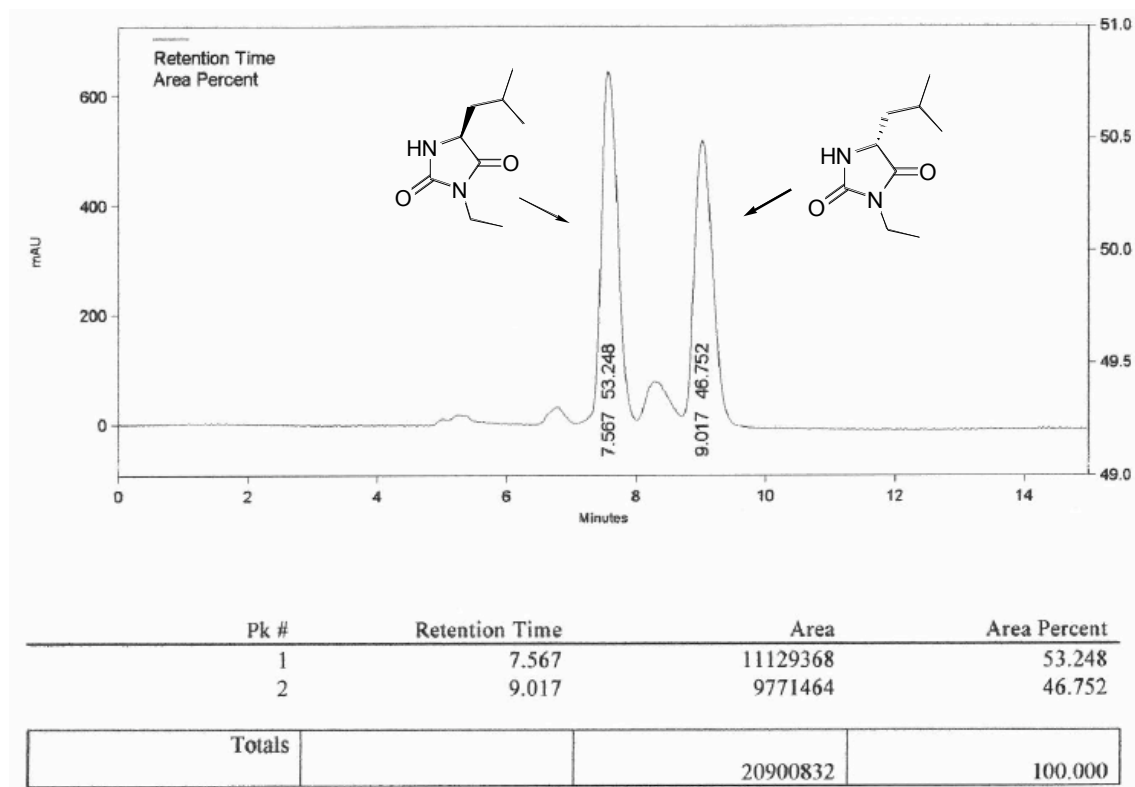

Reaction performed from H-L-Leu-OMe\*HCl, with MeO-PEG-2000-OMe

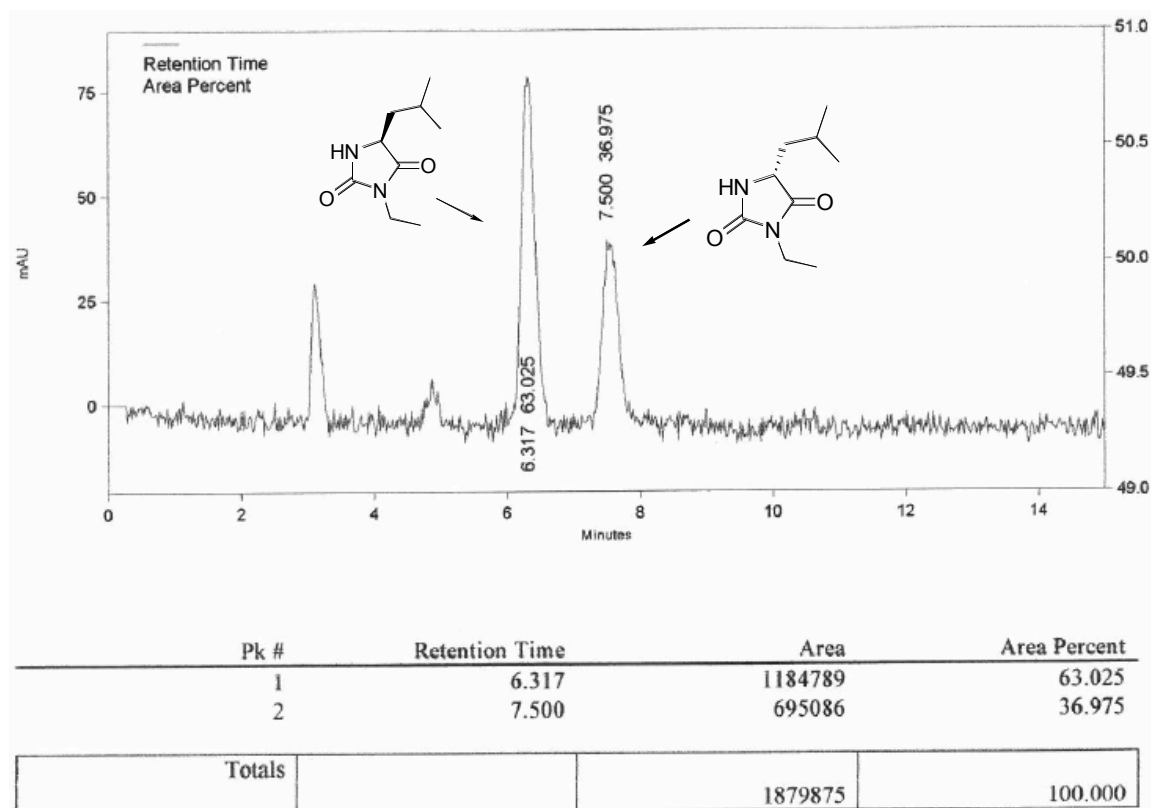

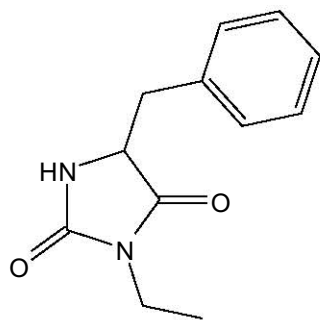

**Compound 2**  
**Table 2, entry 1**

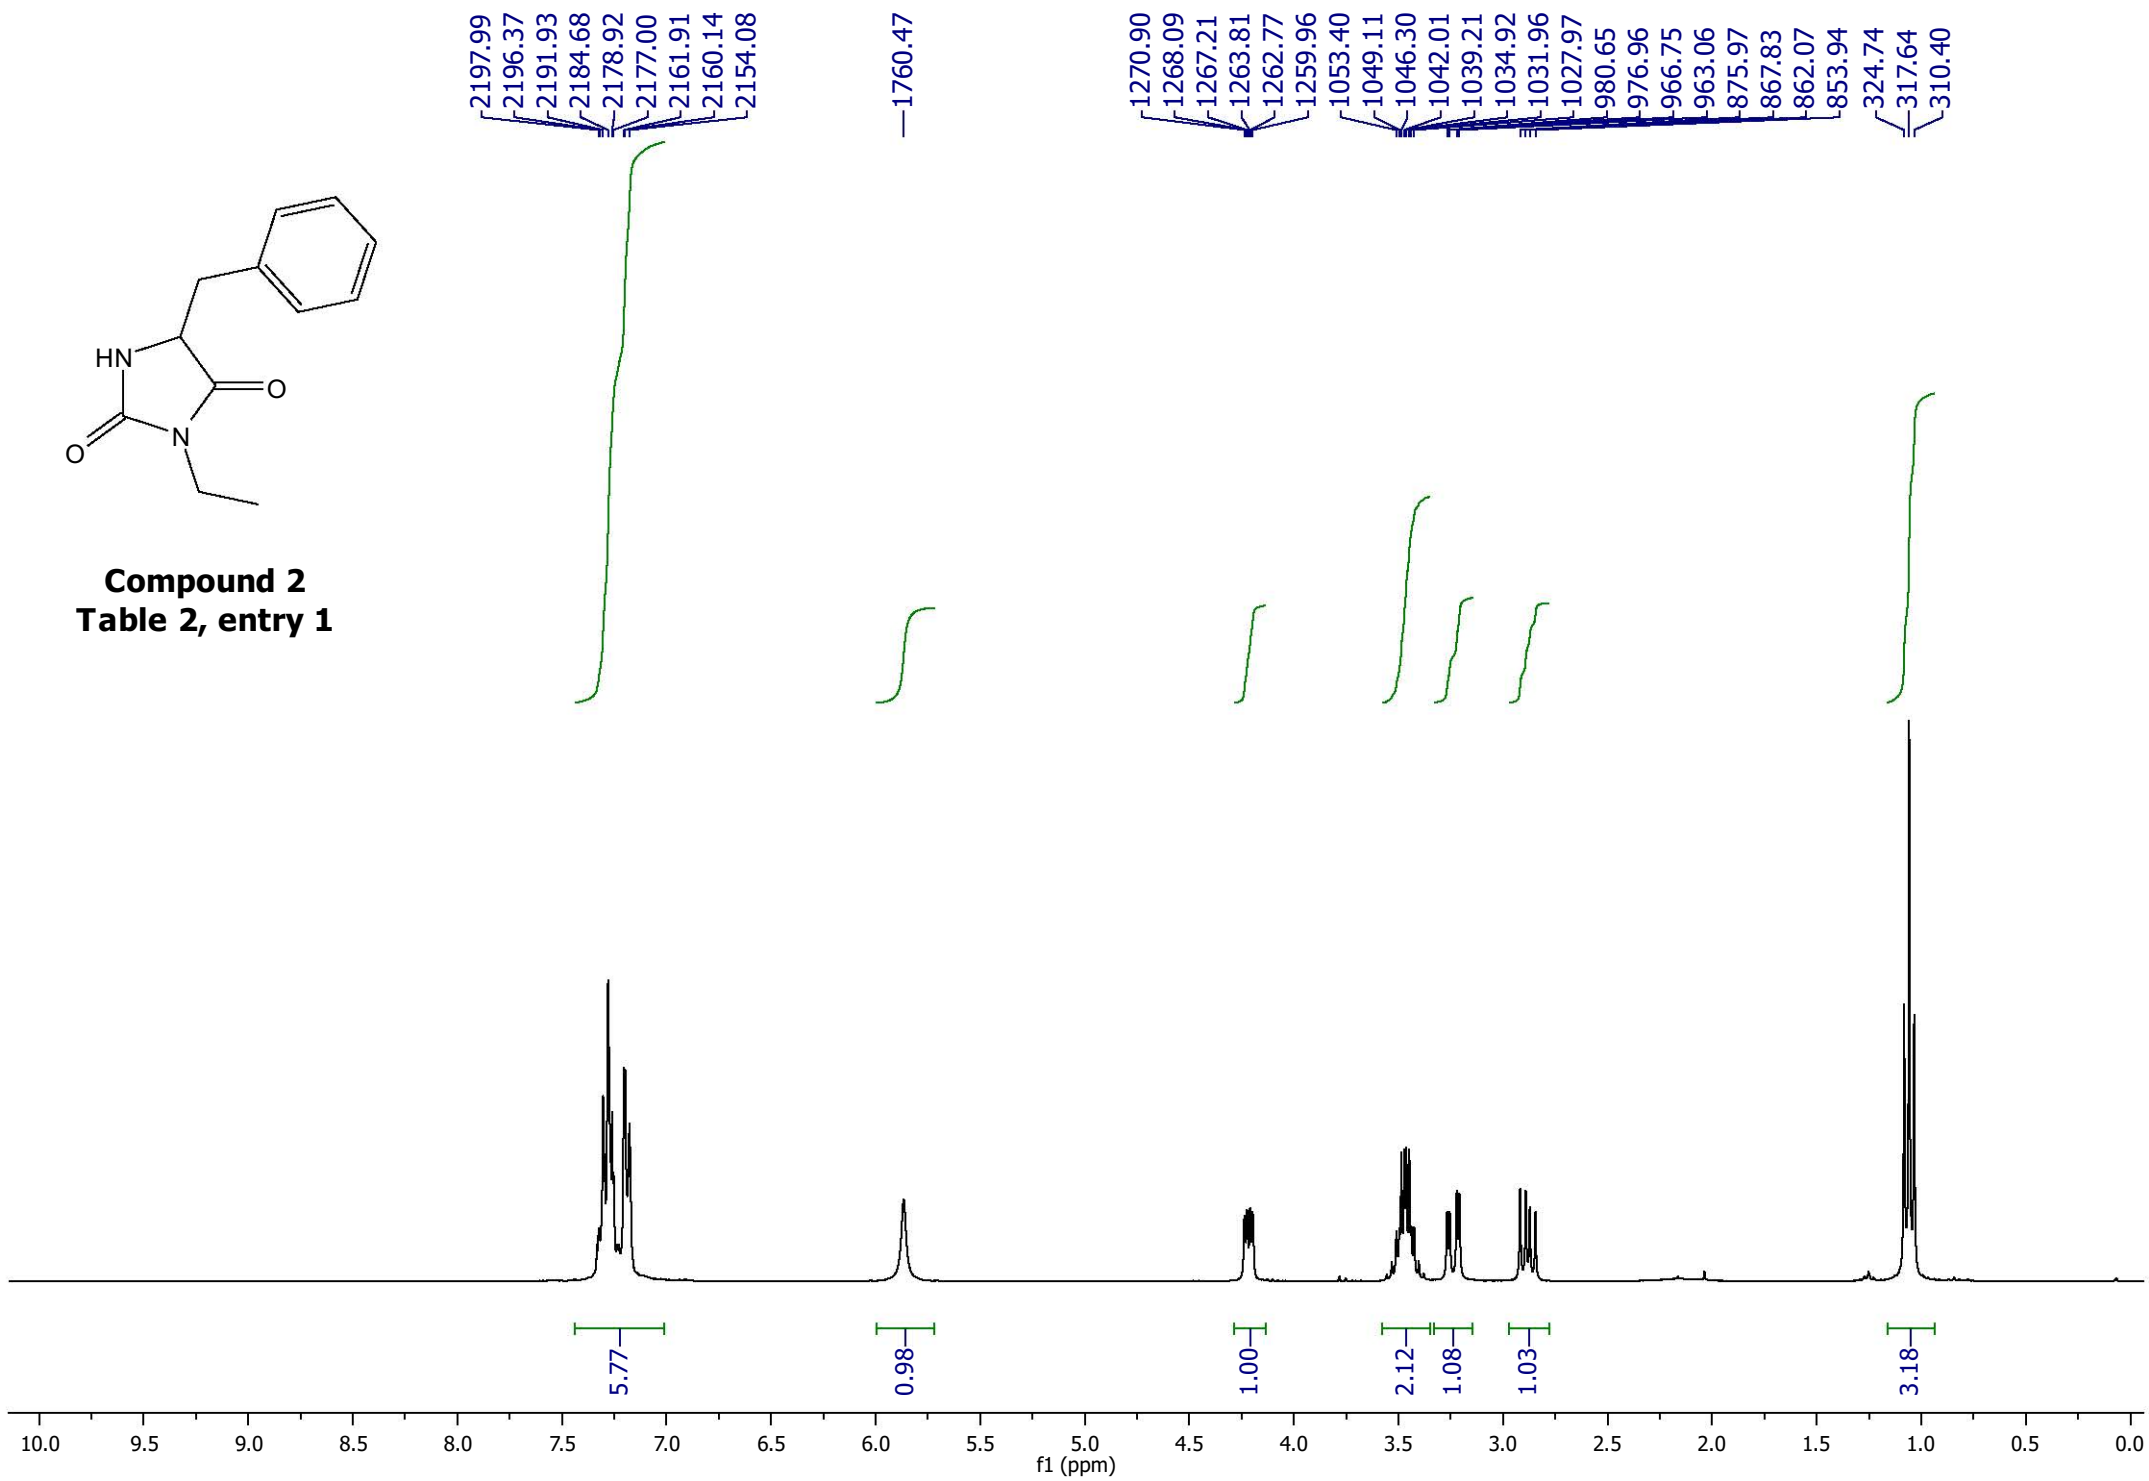

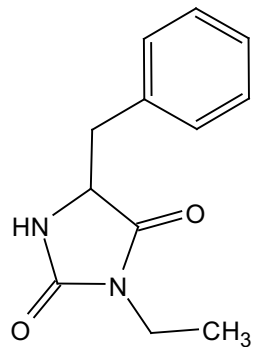

**Compound 2**  
**Table 2, entry 1**

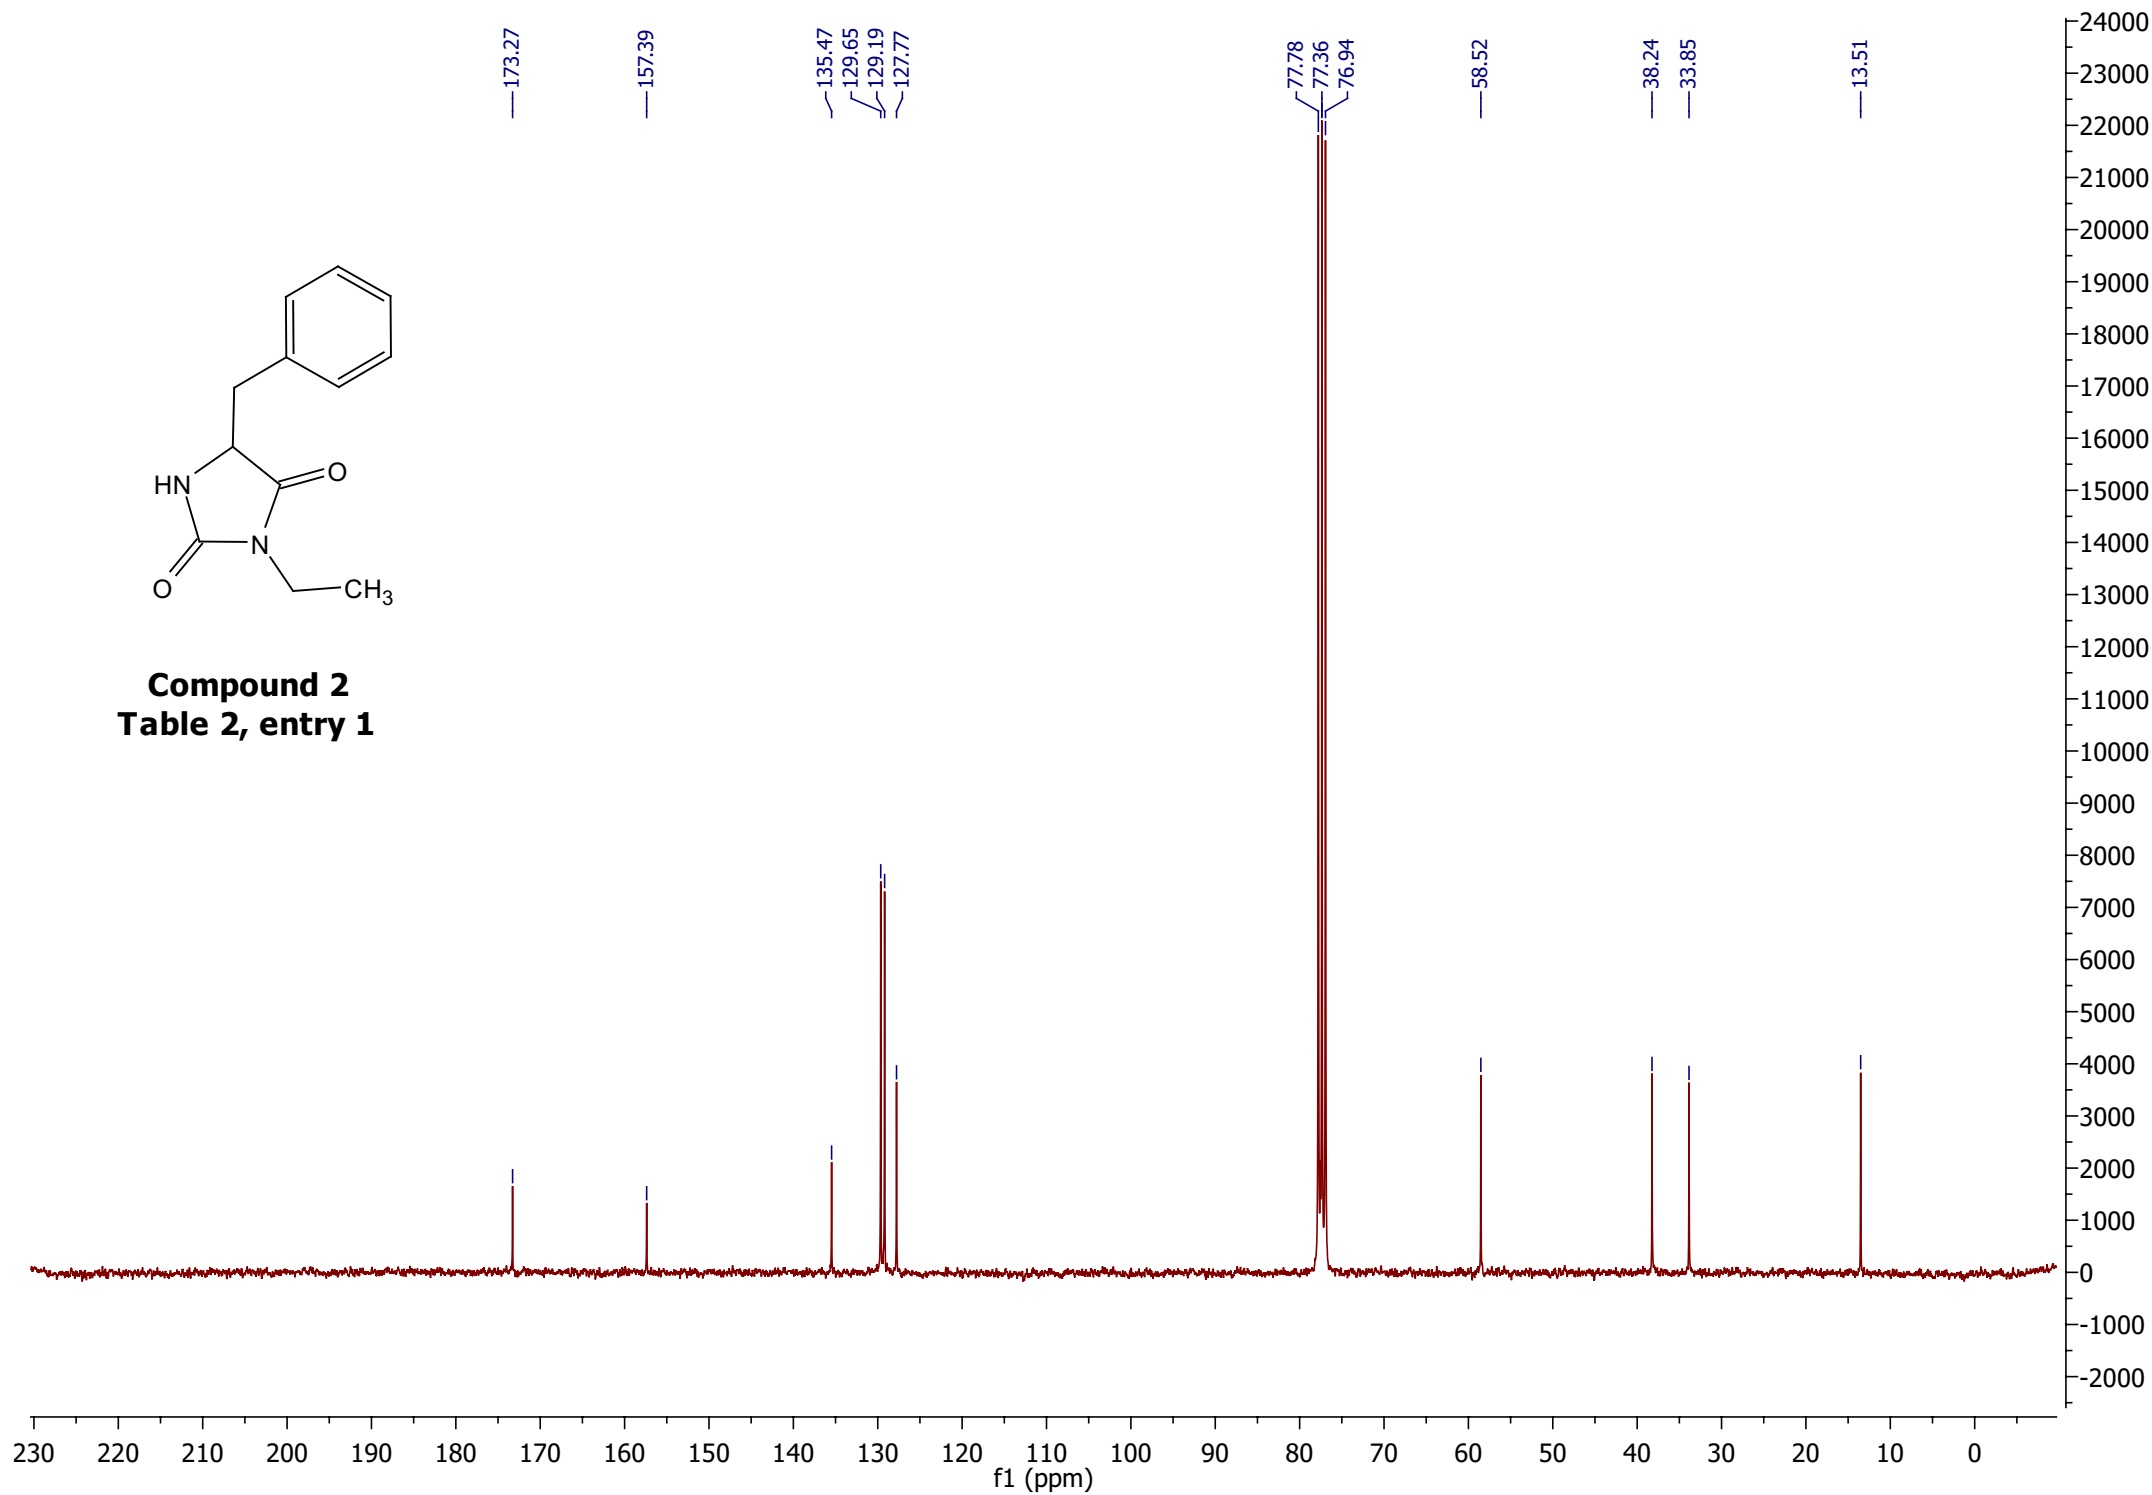

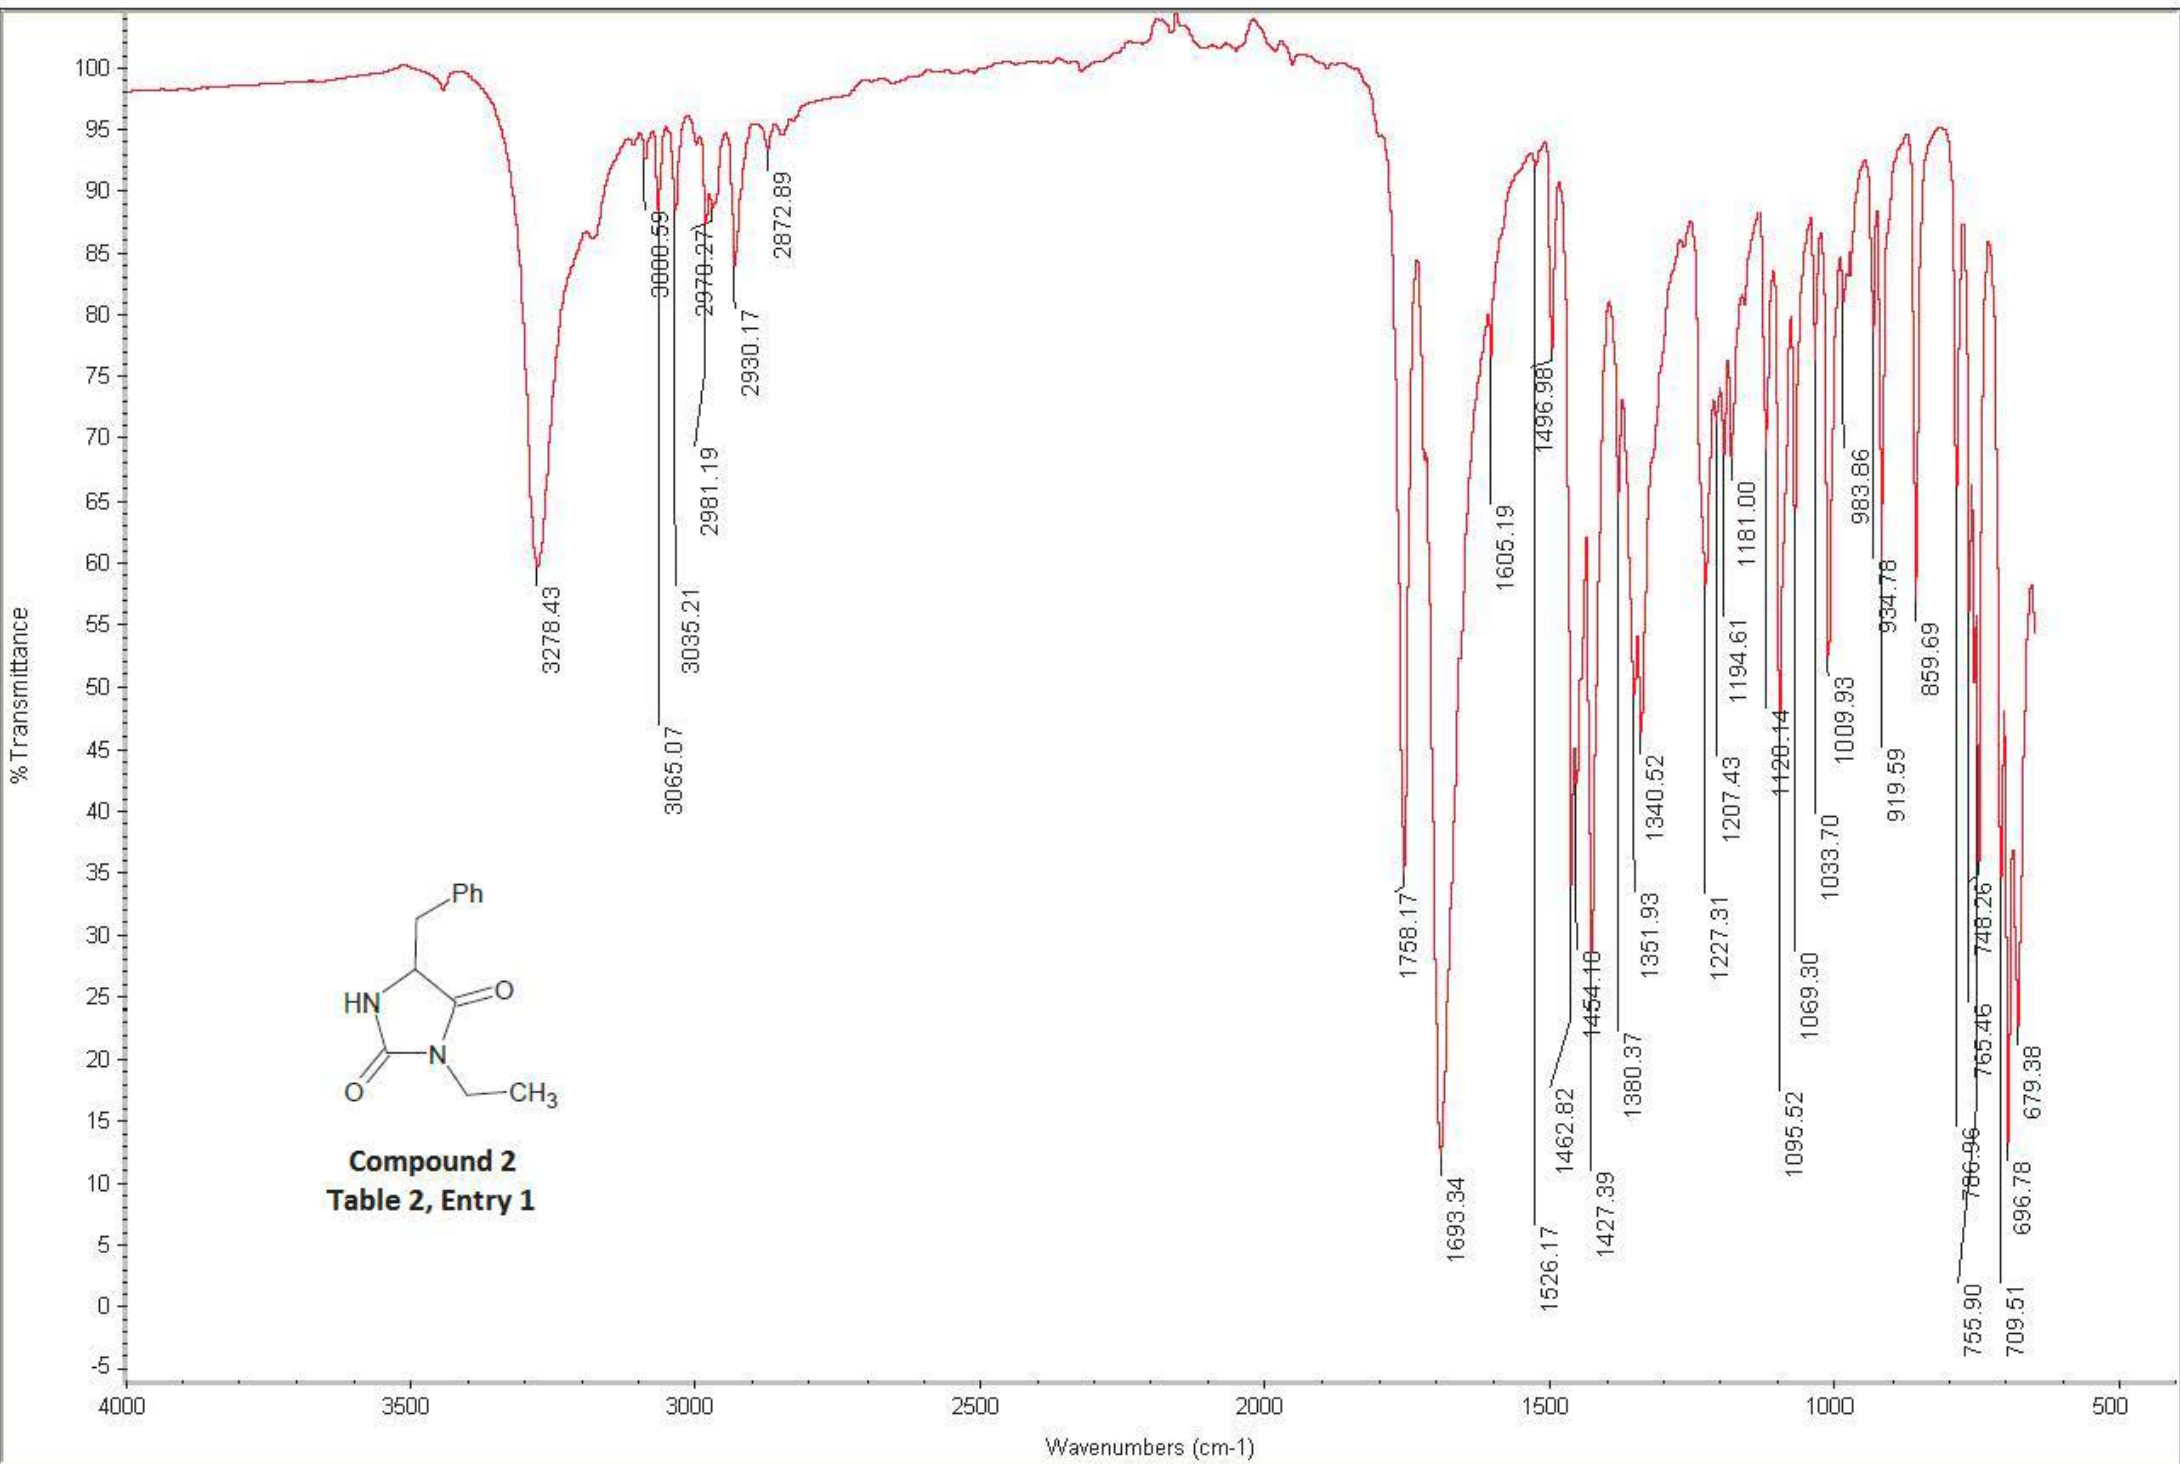



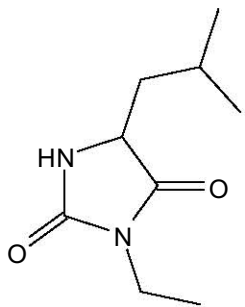

**Compound 4**  
**Table 2, entry 2**

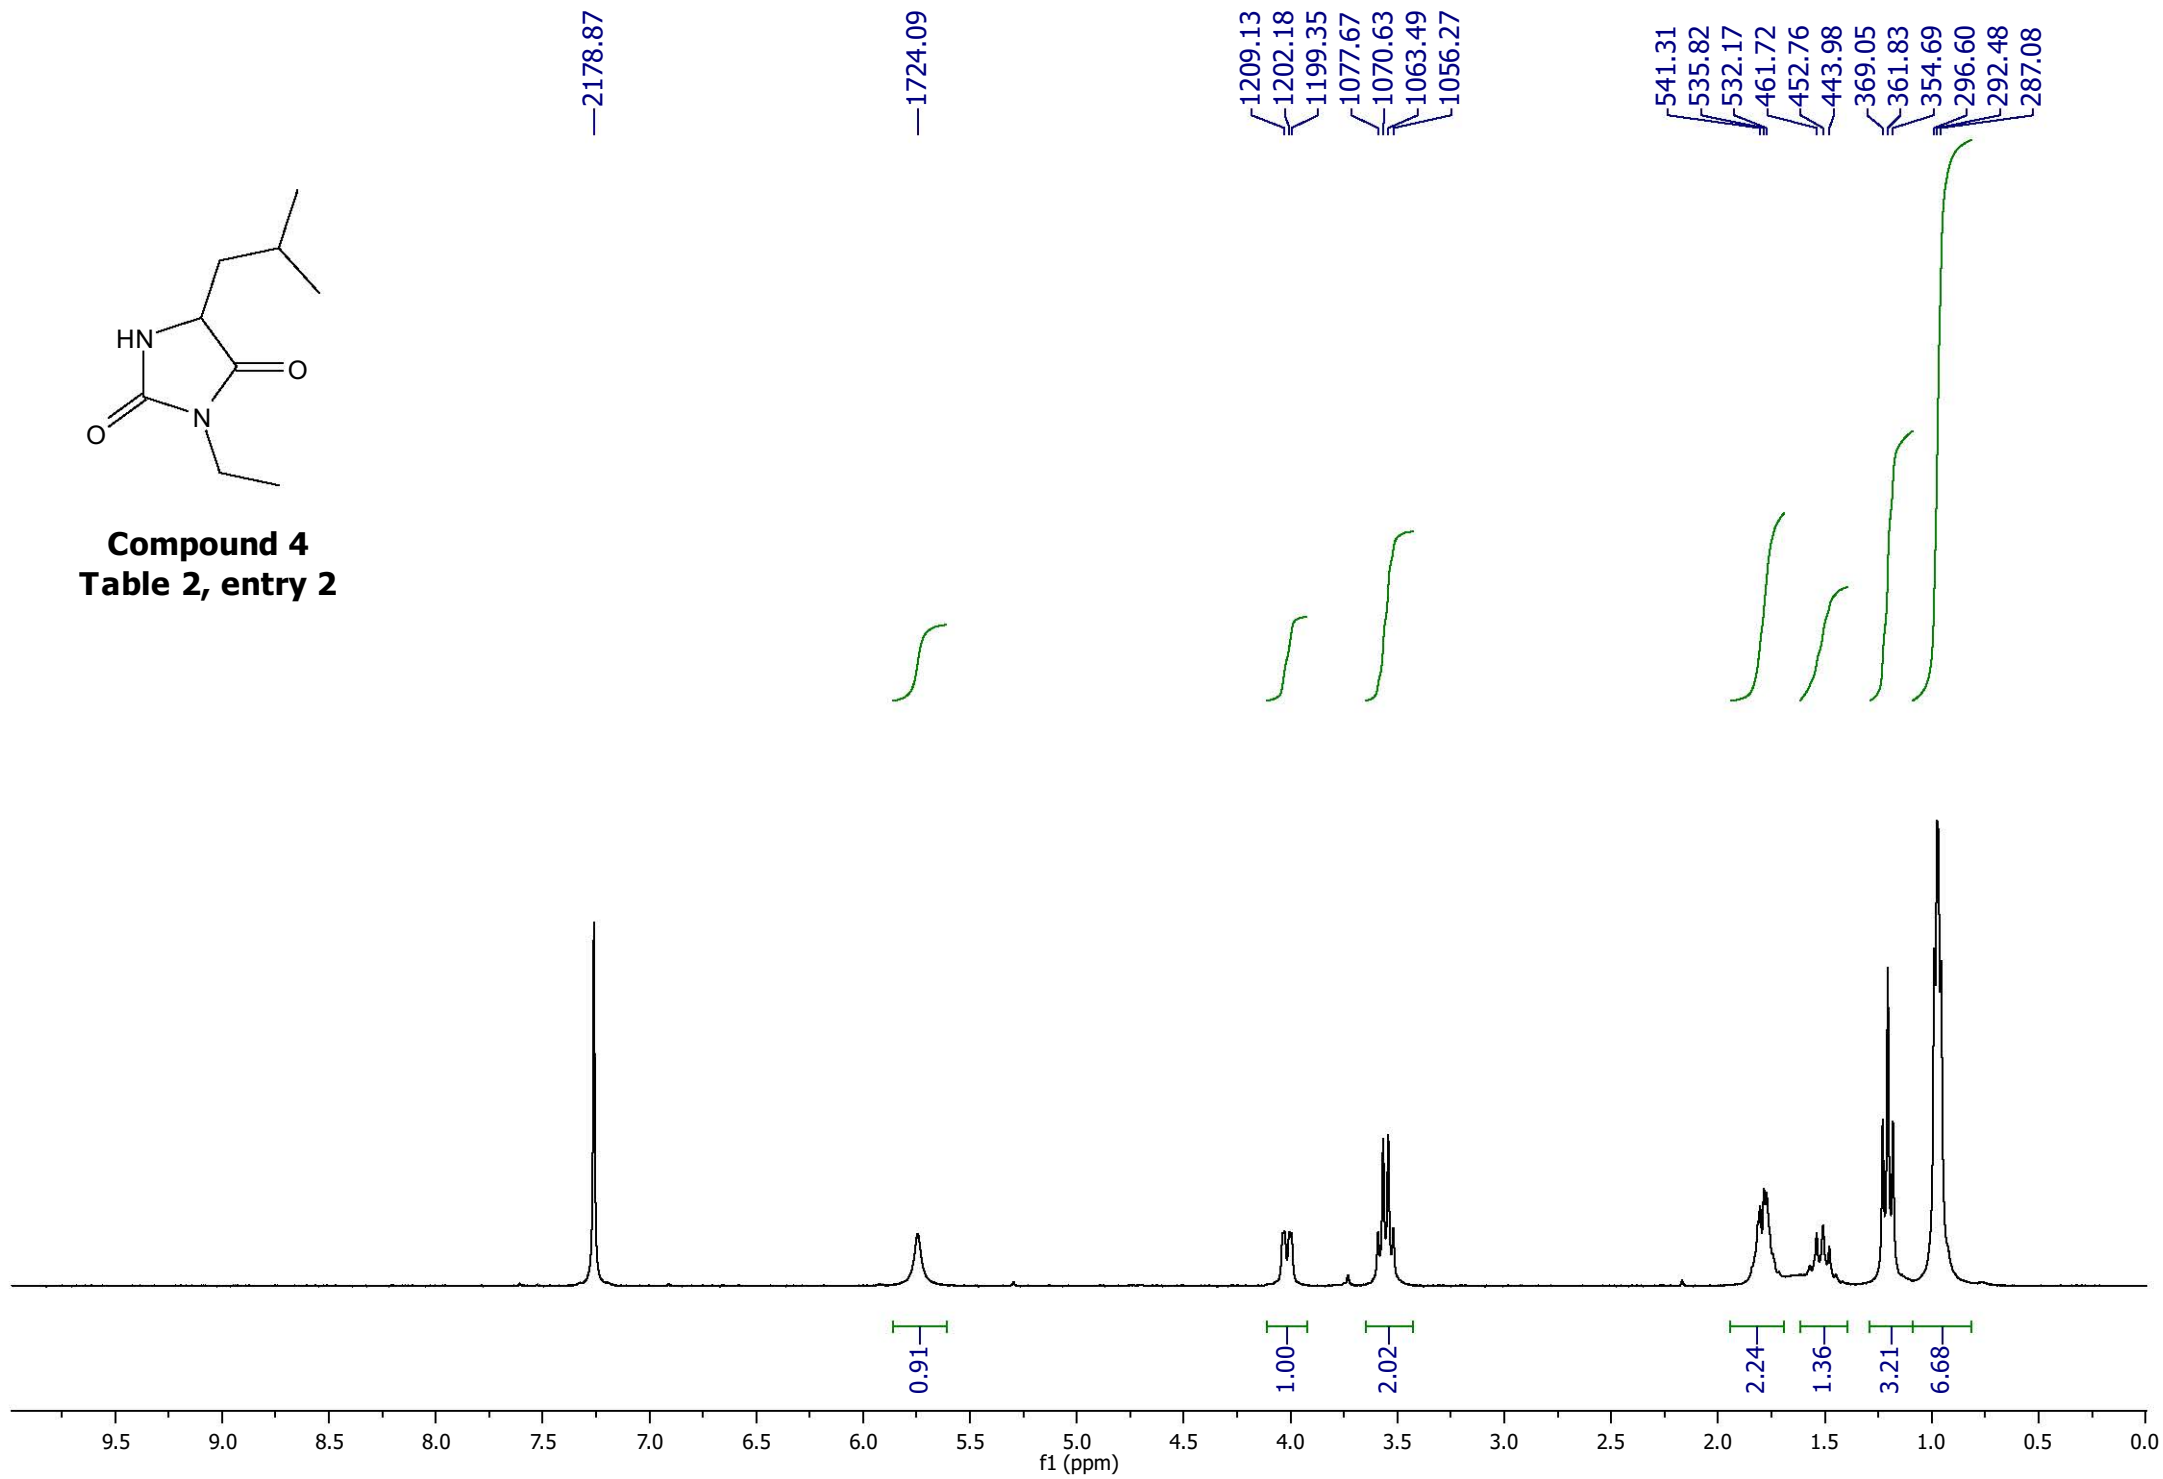

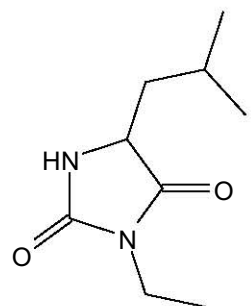

**Compound 4**  
**Table 2, entry 2**

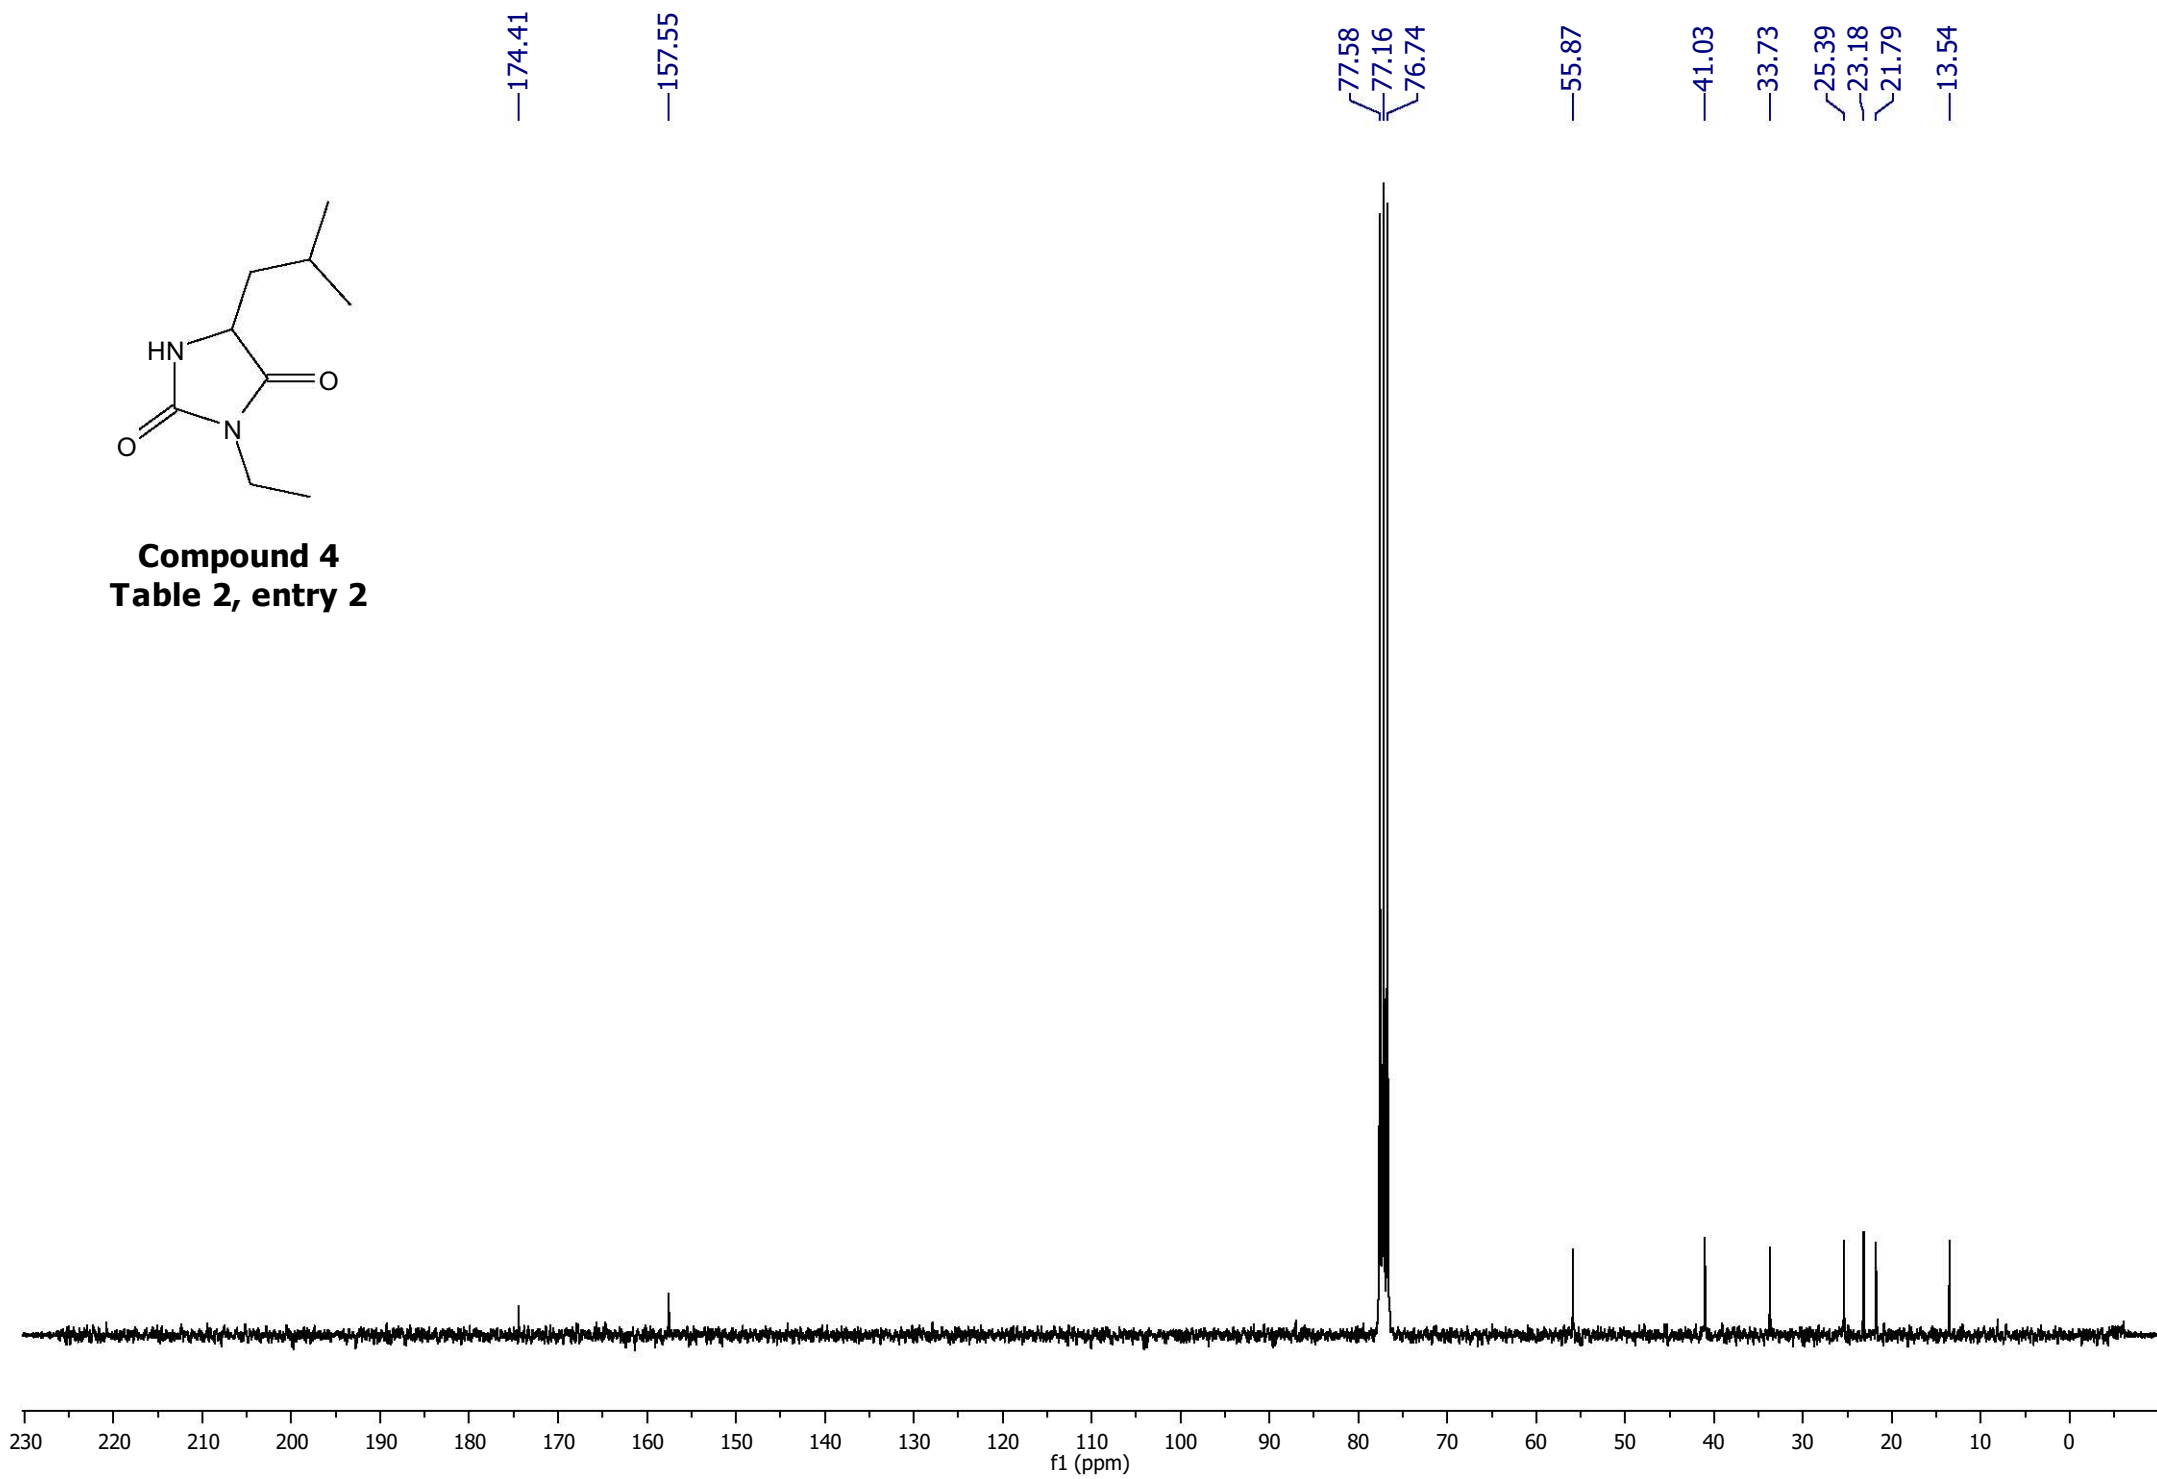

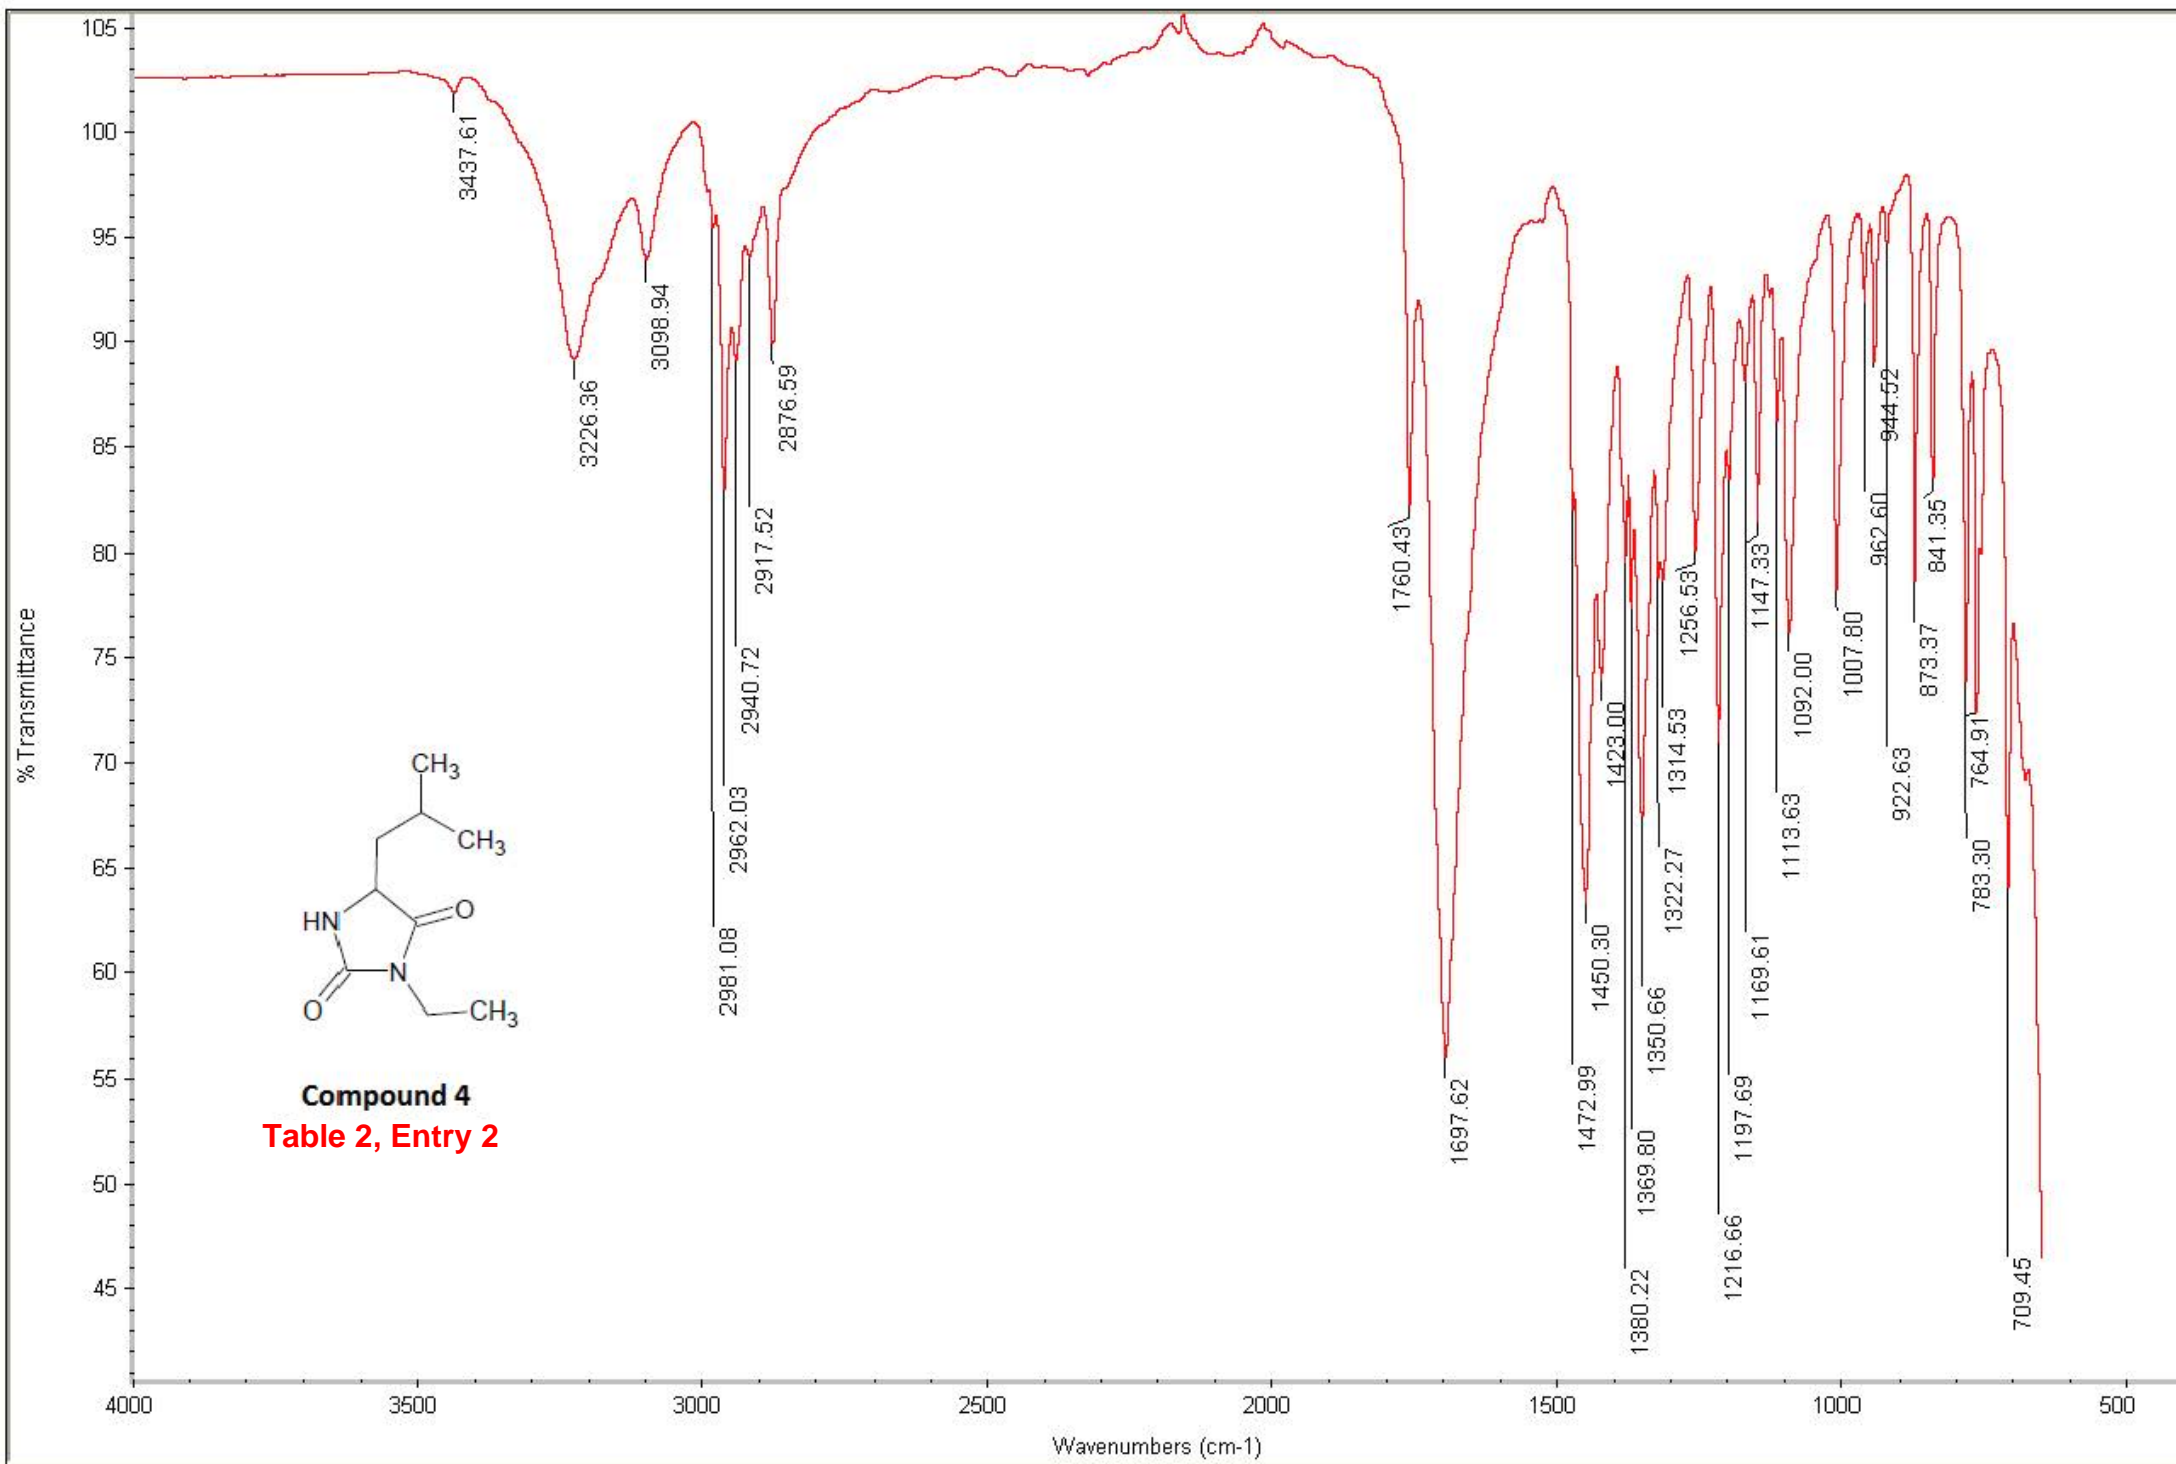

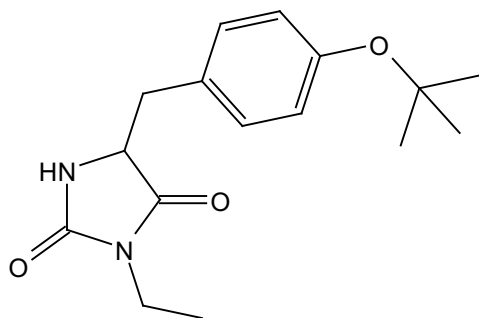

**Compound 5**  
**Table 2, entry 3**

2178.85  
2130.64  
2122.40  
2084.44  
2076.20

1617.88

1262.01  
1257.16  
1253.96  
1057.27  
1050.69  
1045.75  
1038.89  
1032.12  
969.18  
965.88  
955.27  
951.79  
860.77  
852.54  
846.96  
838.54

396.86  
331.18  
324.04  
316.91

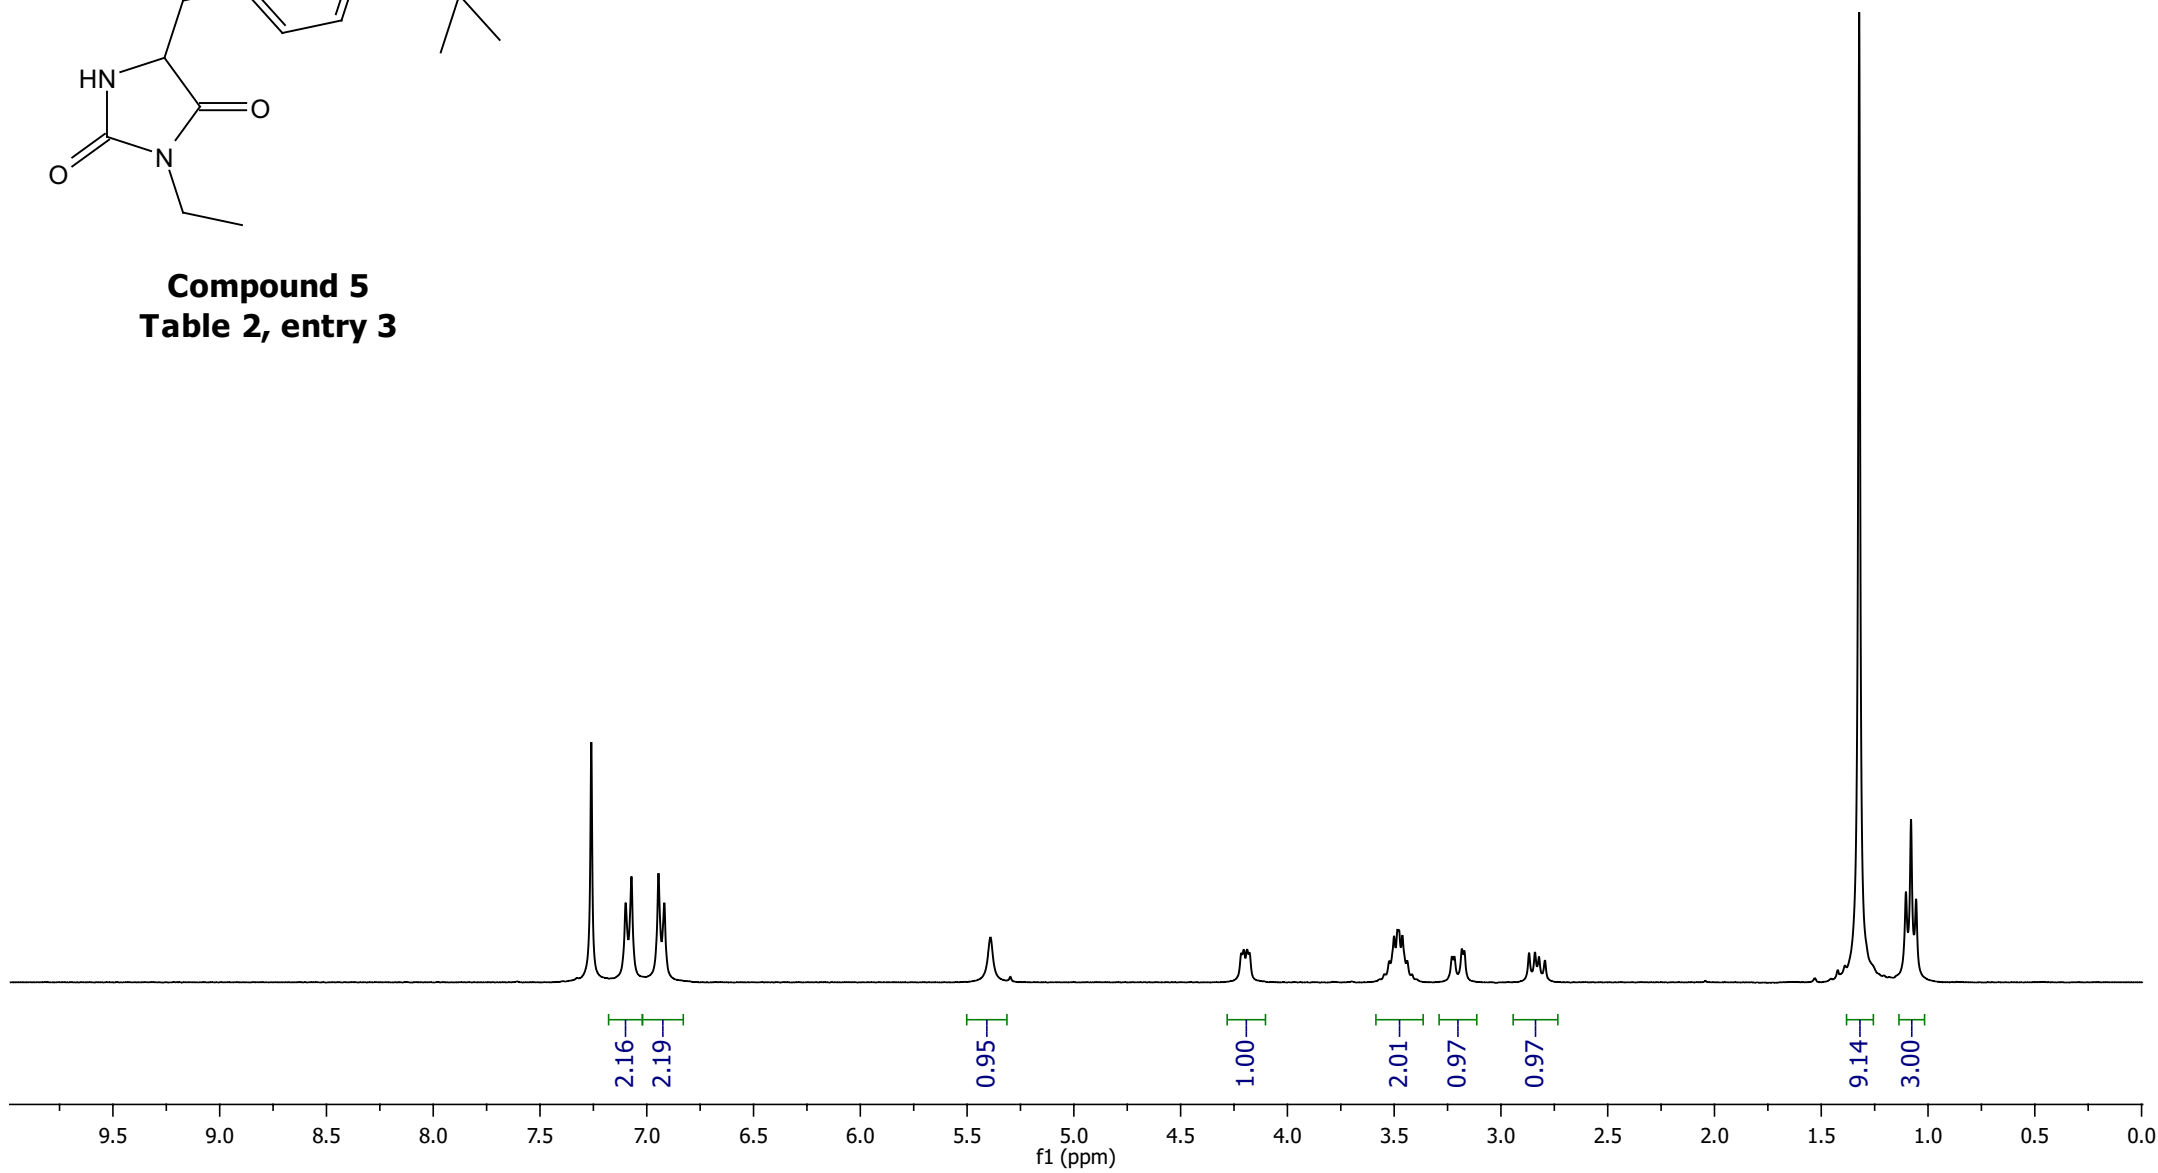

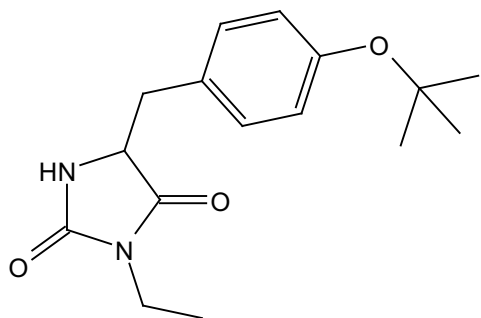

**Compound 5**  
**Table 2, entry 3**

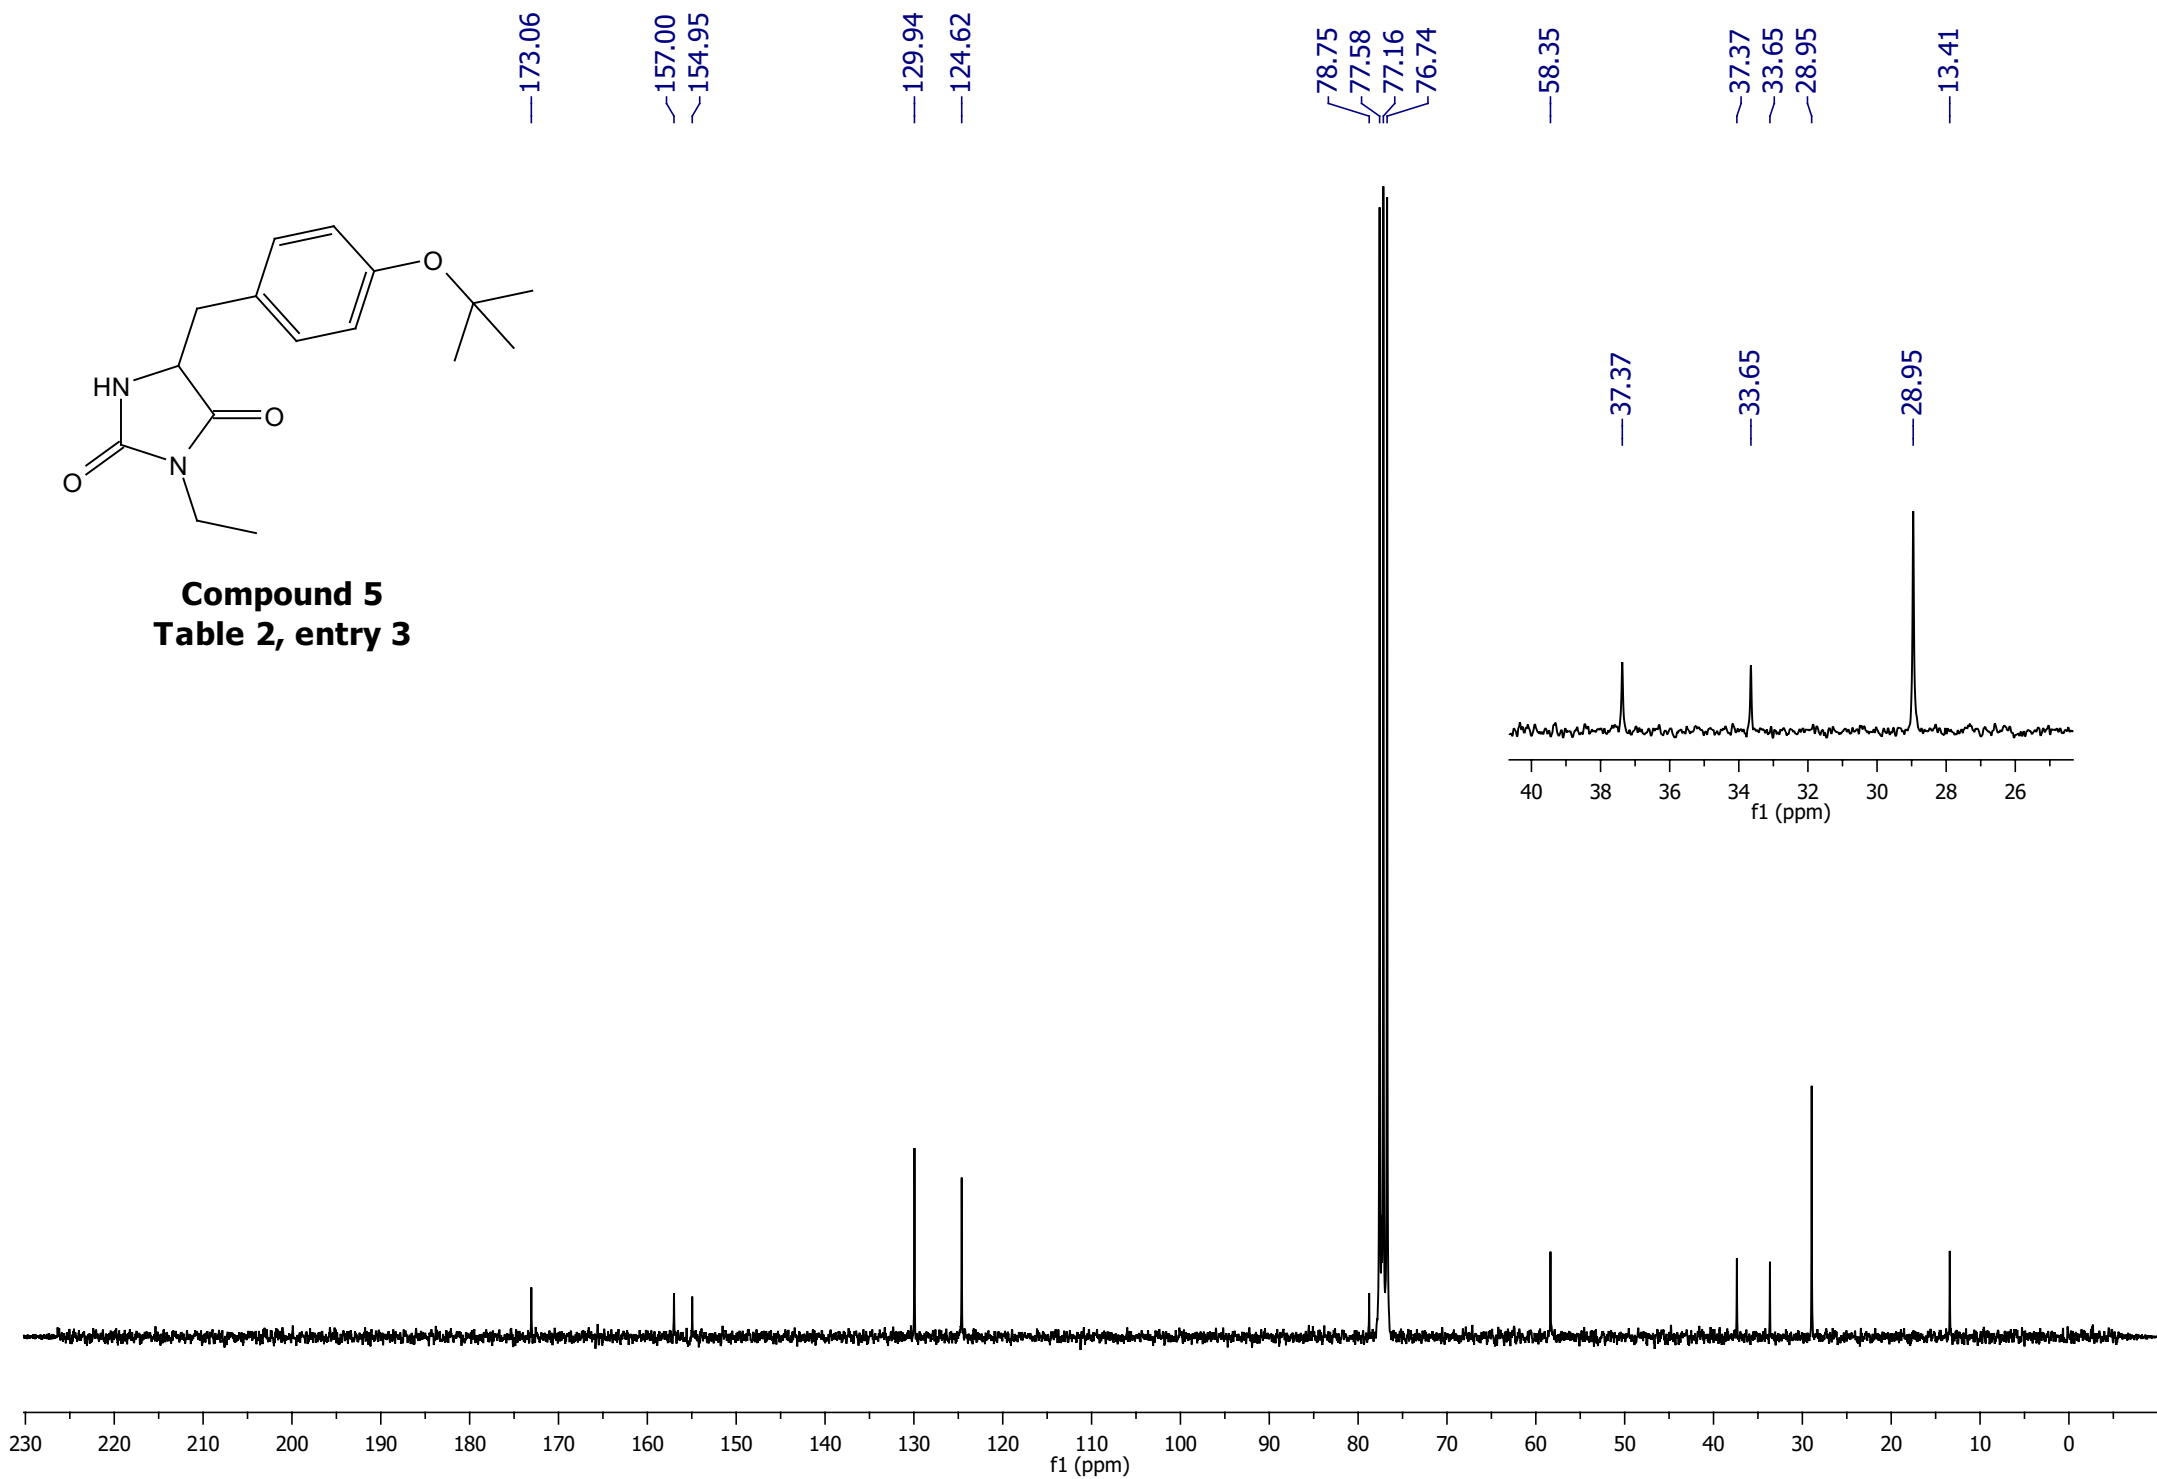

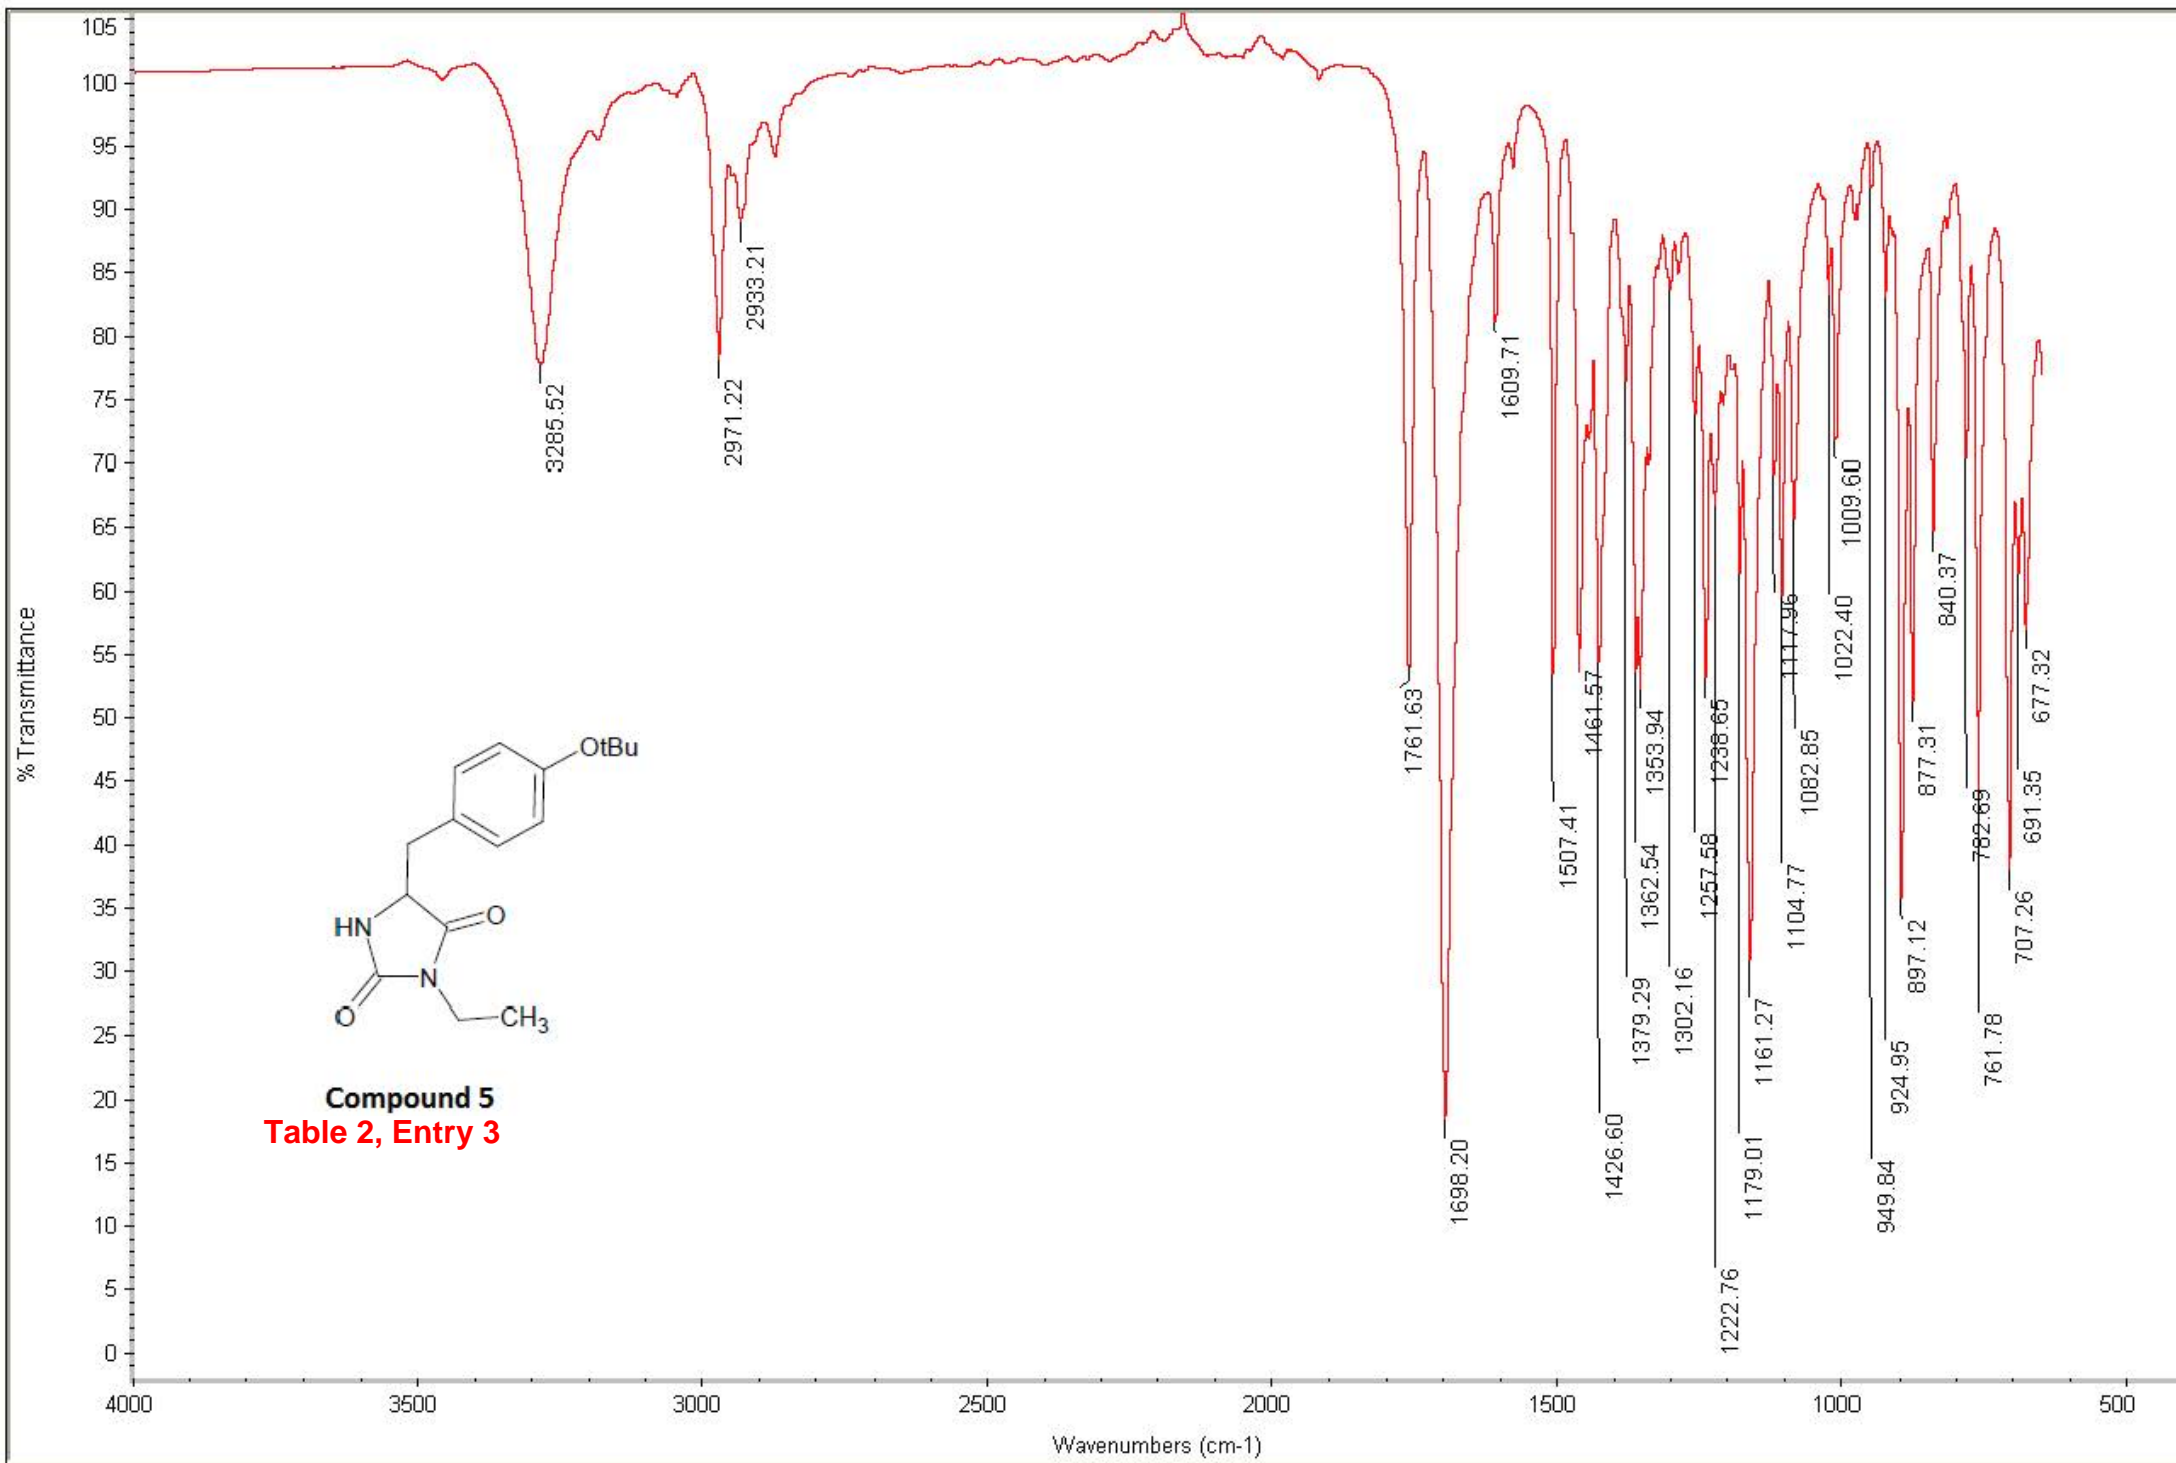

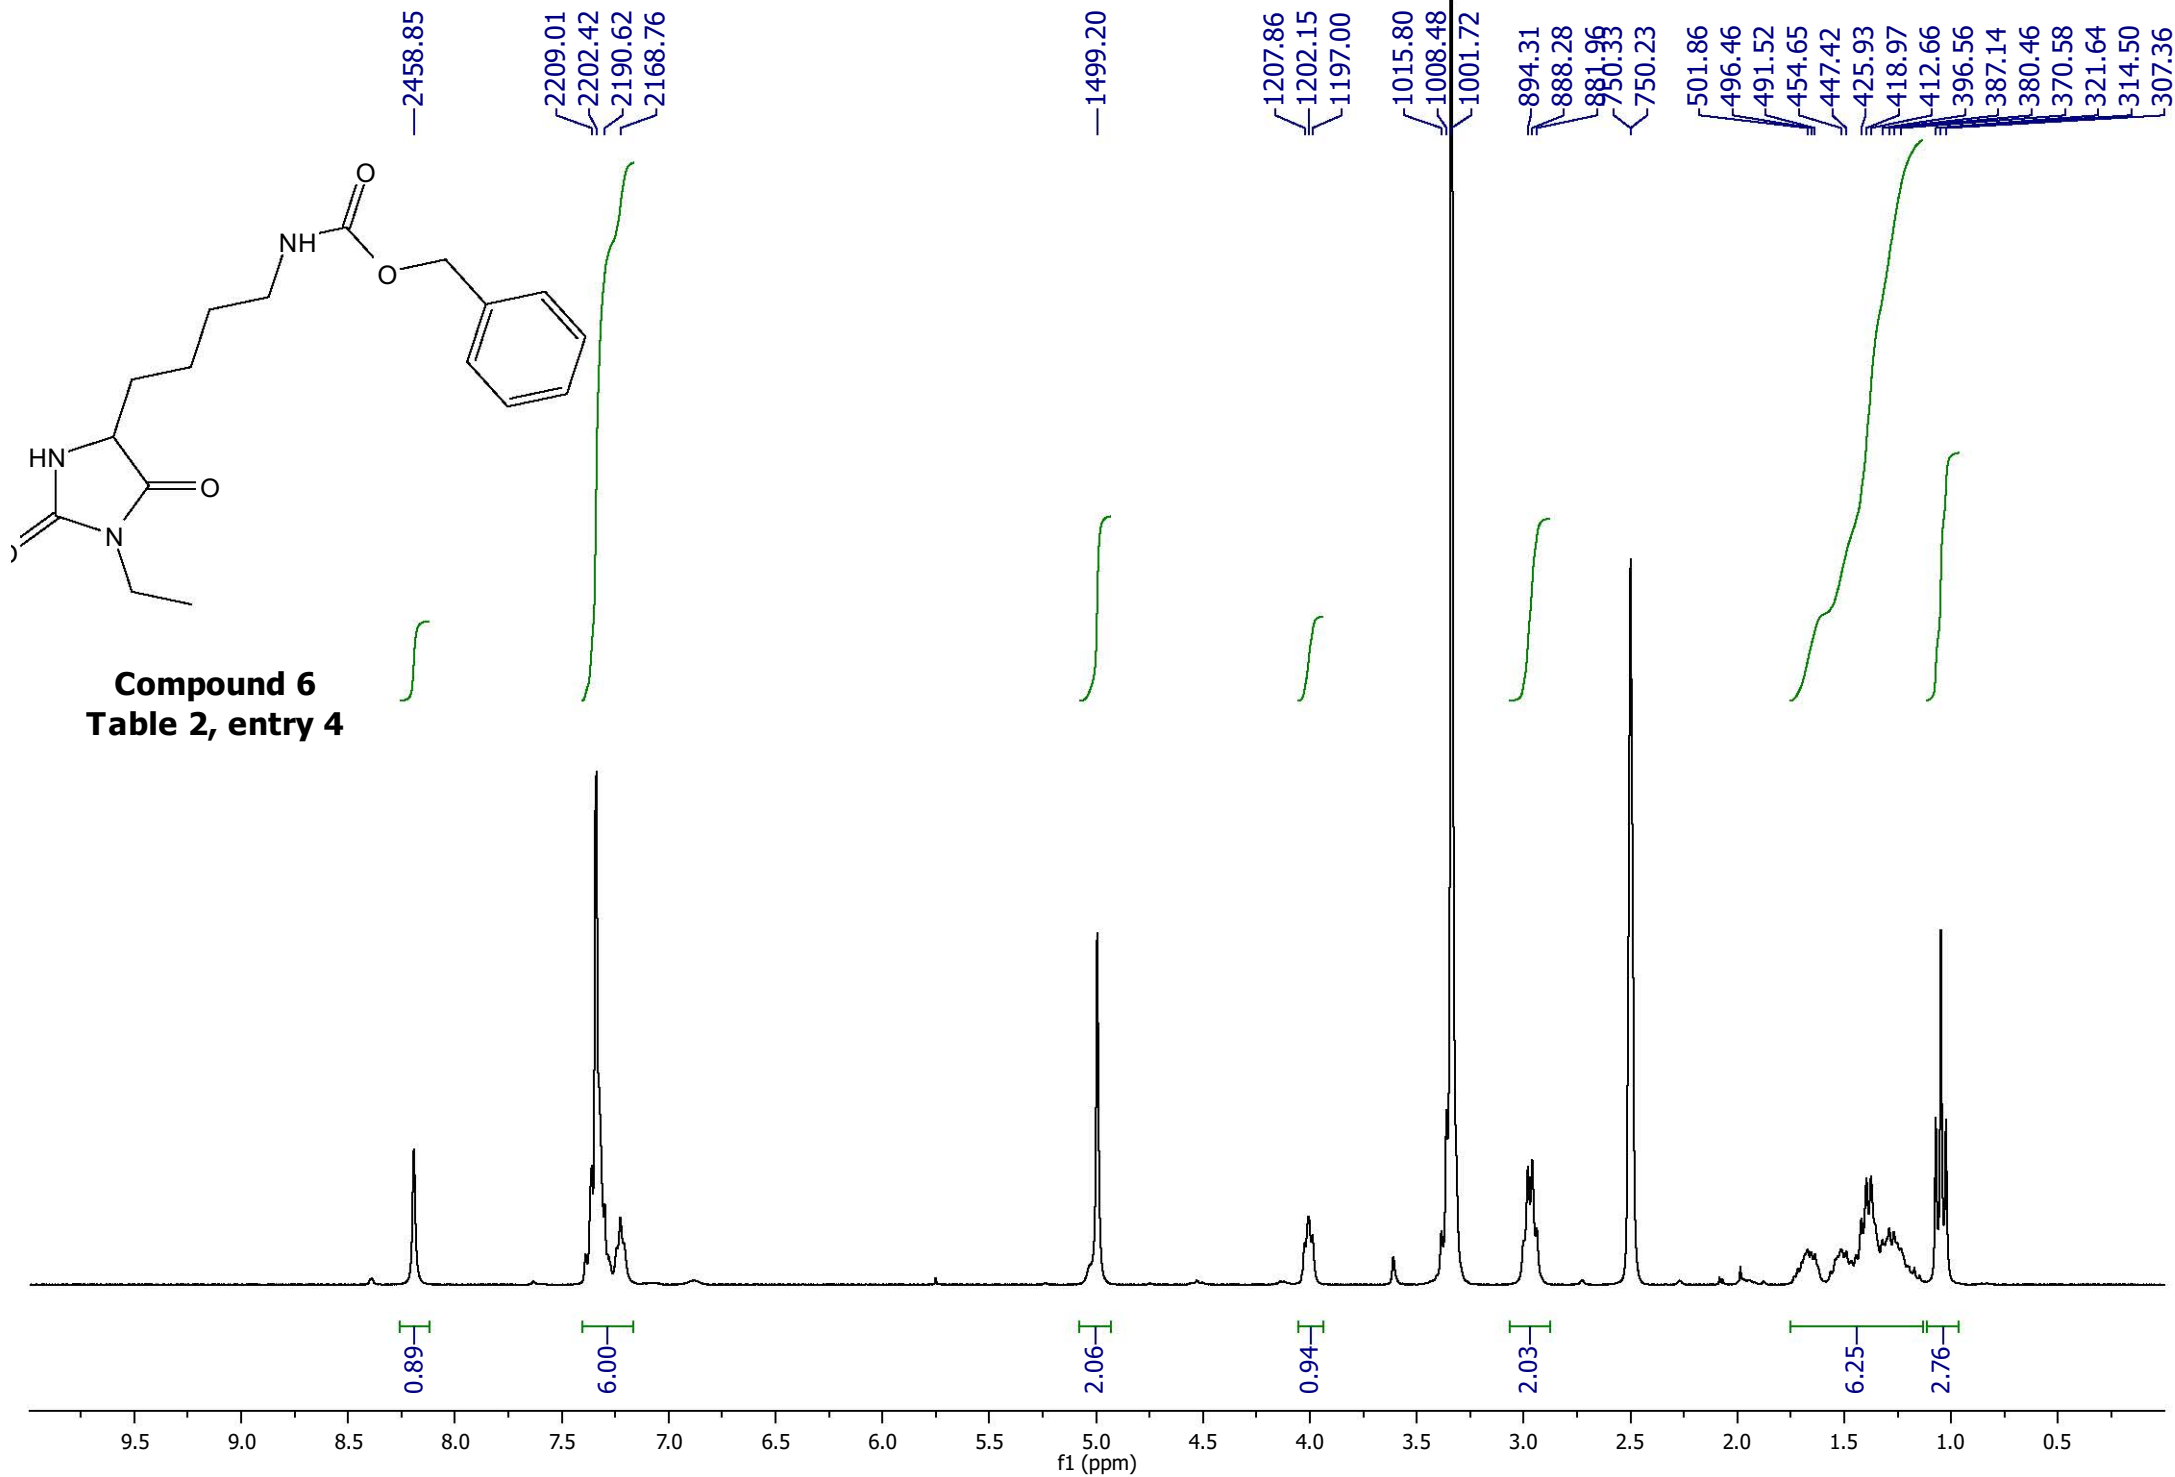

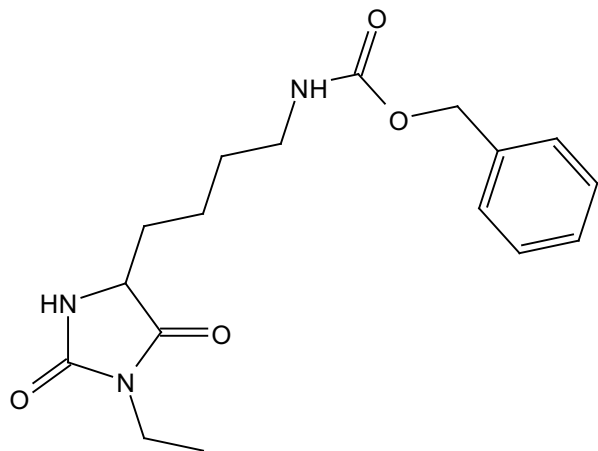

**Compound 6**  
**Table 2, entry 4**

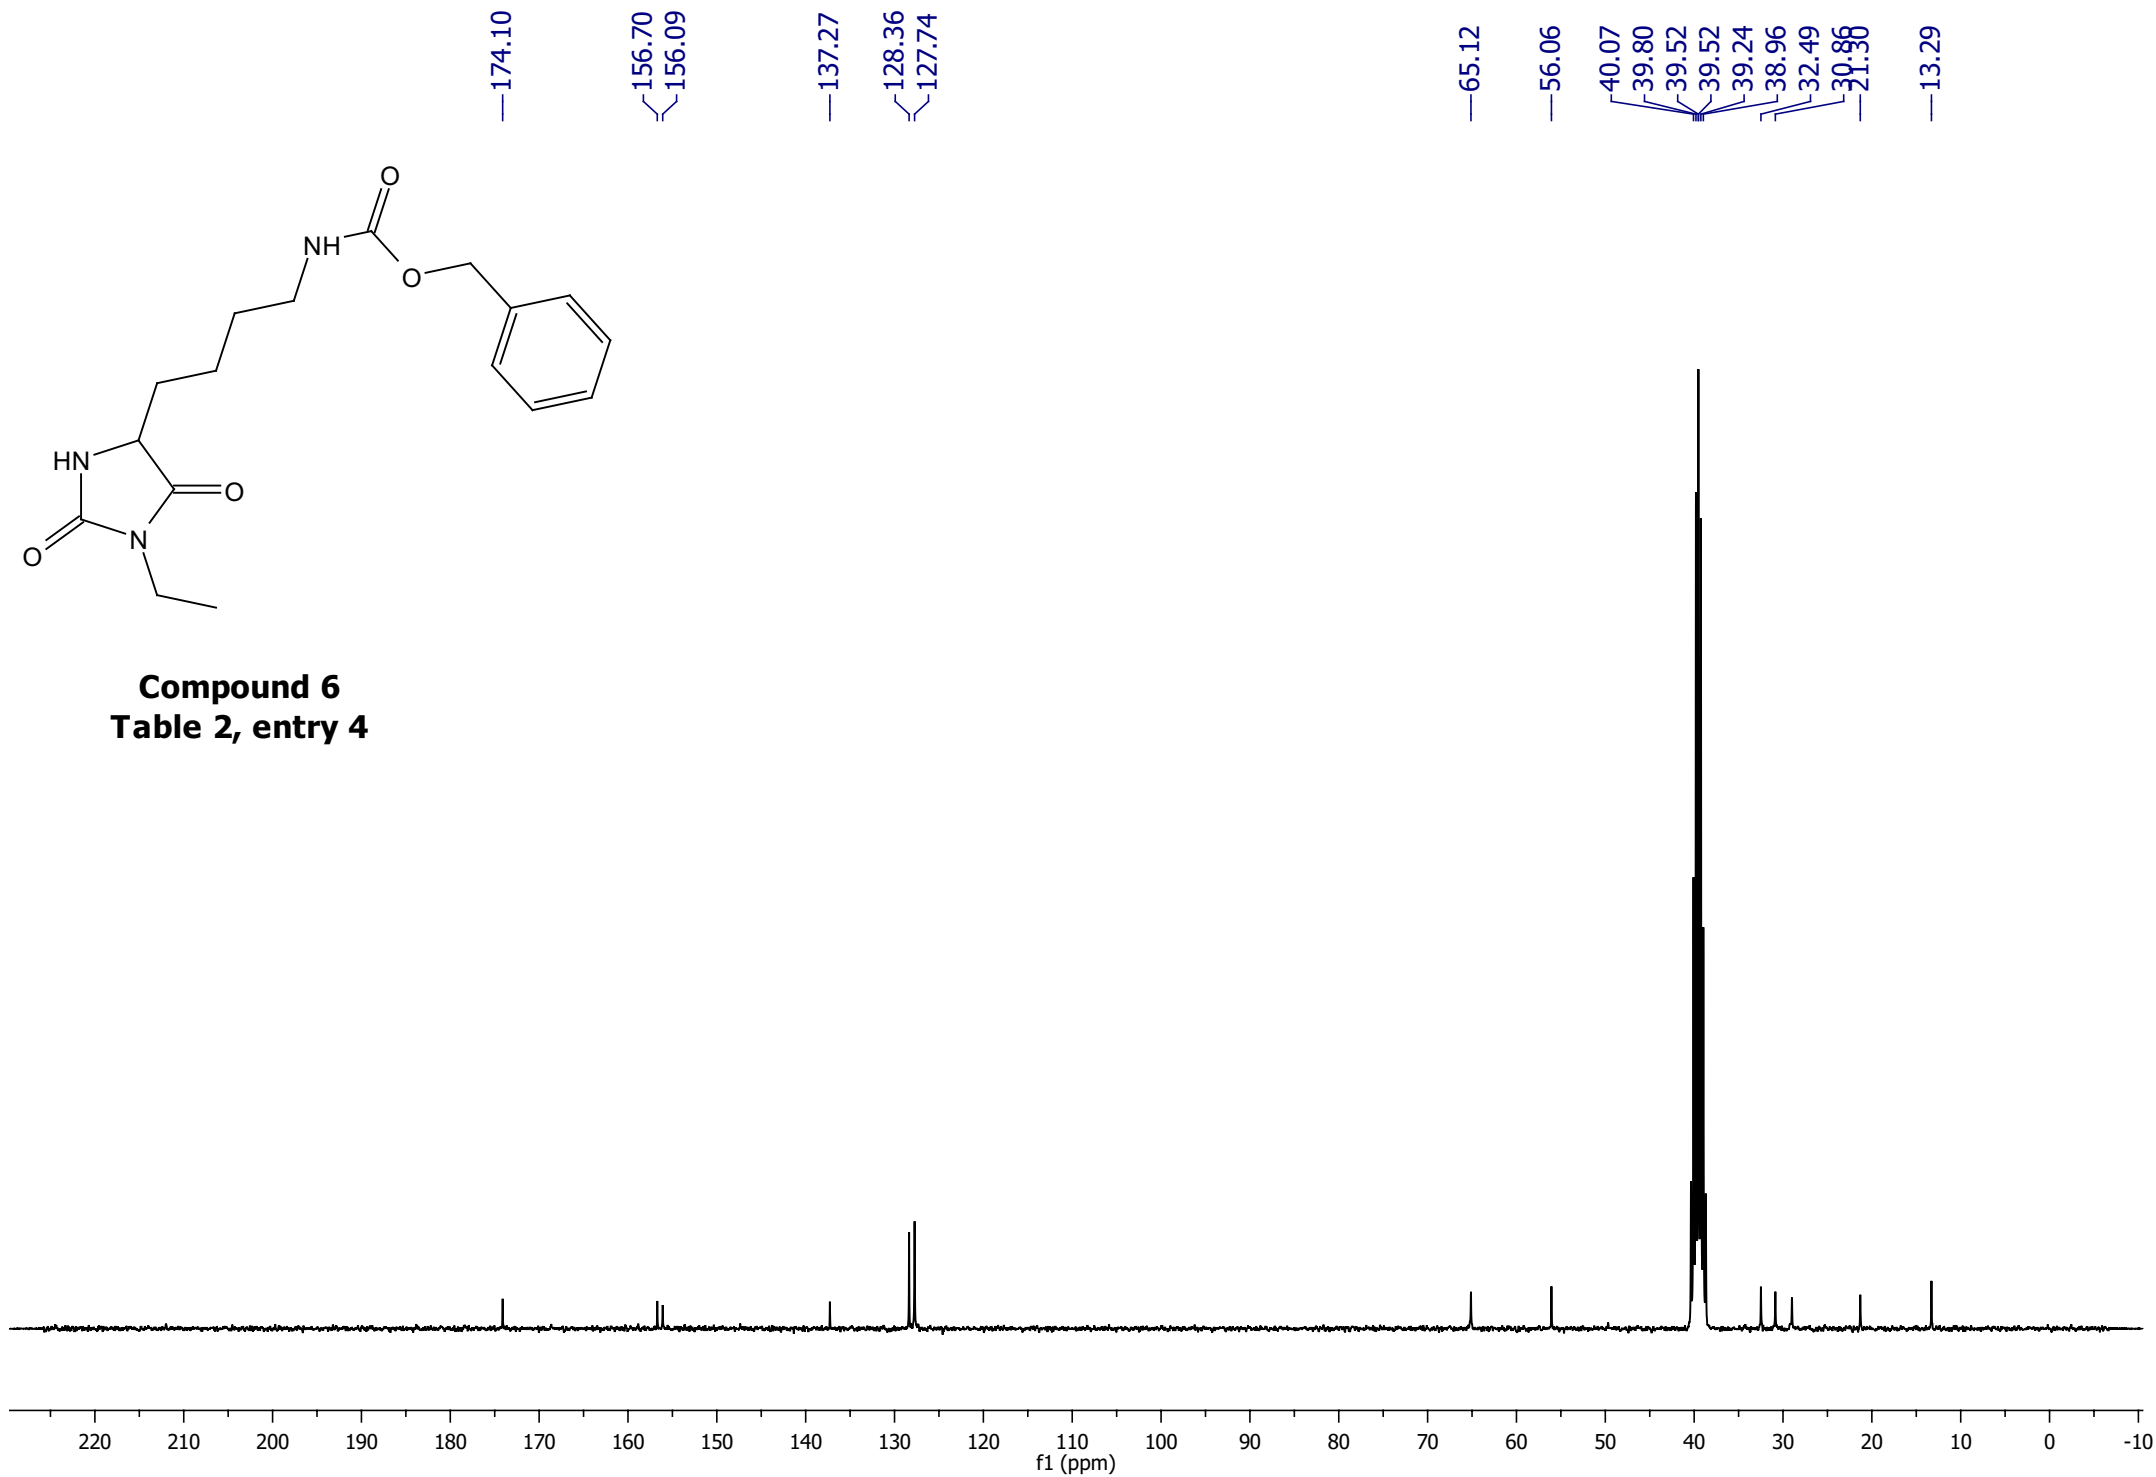



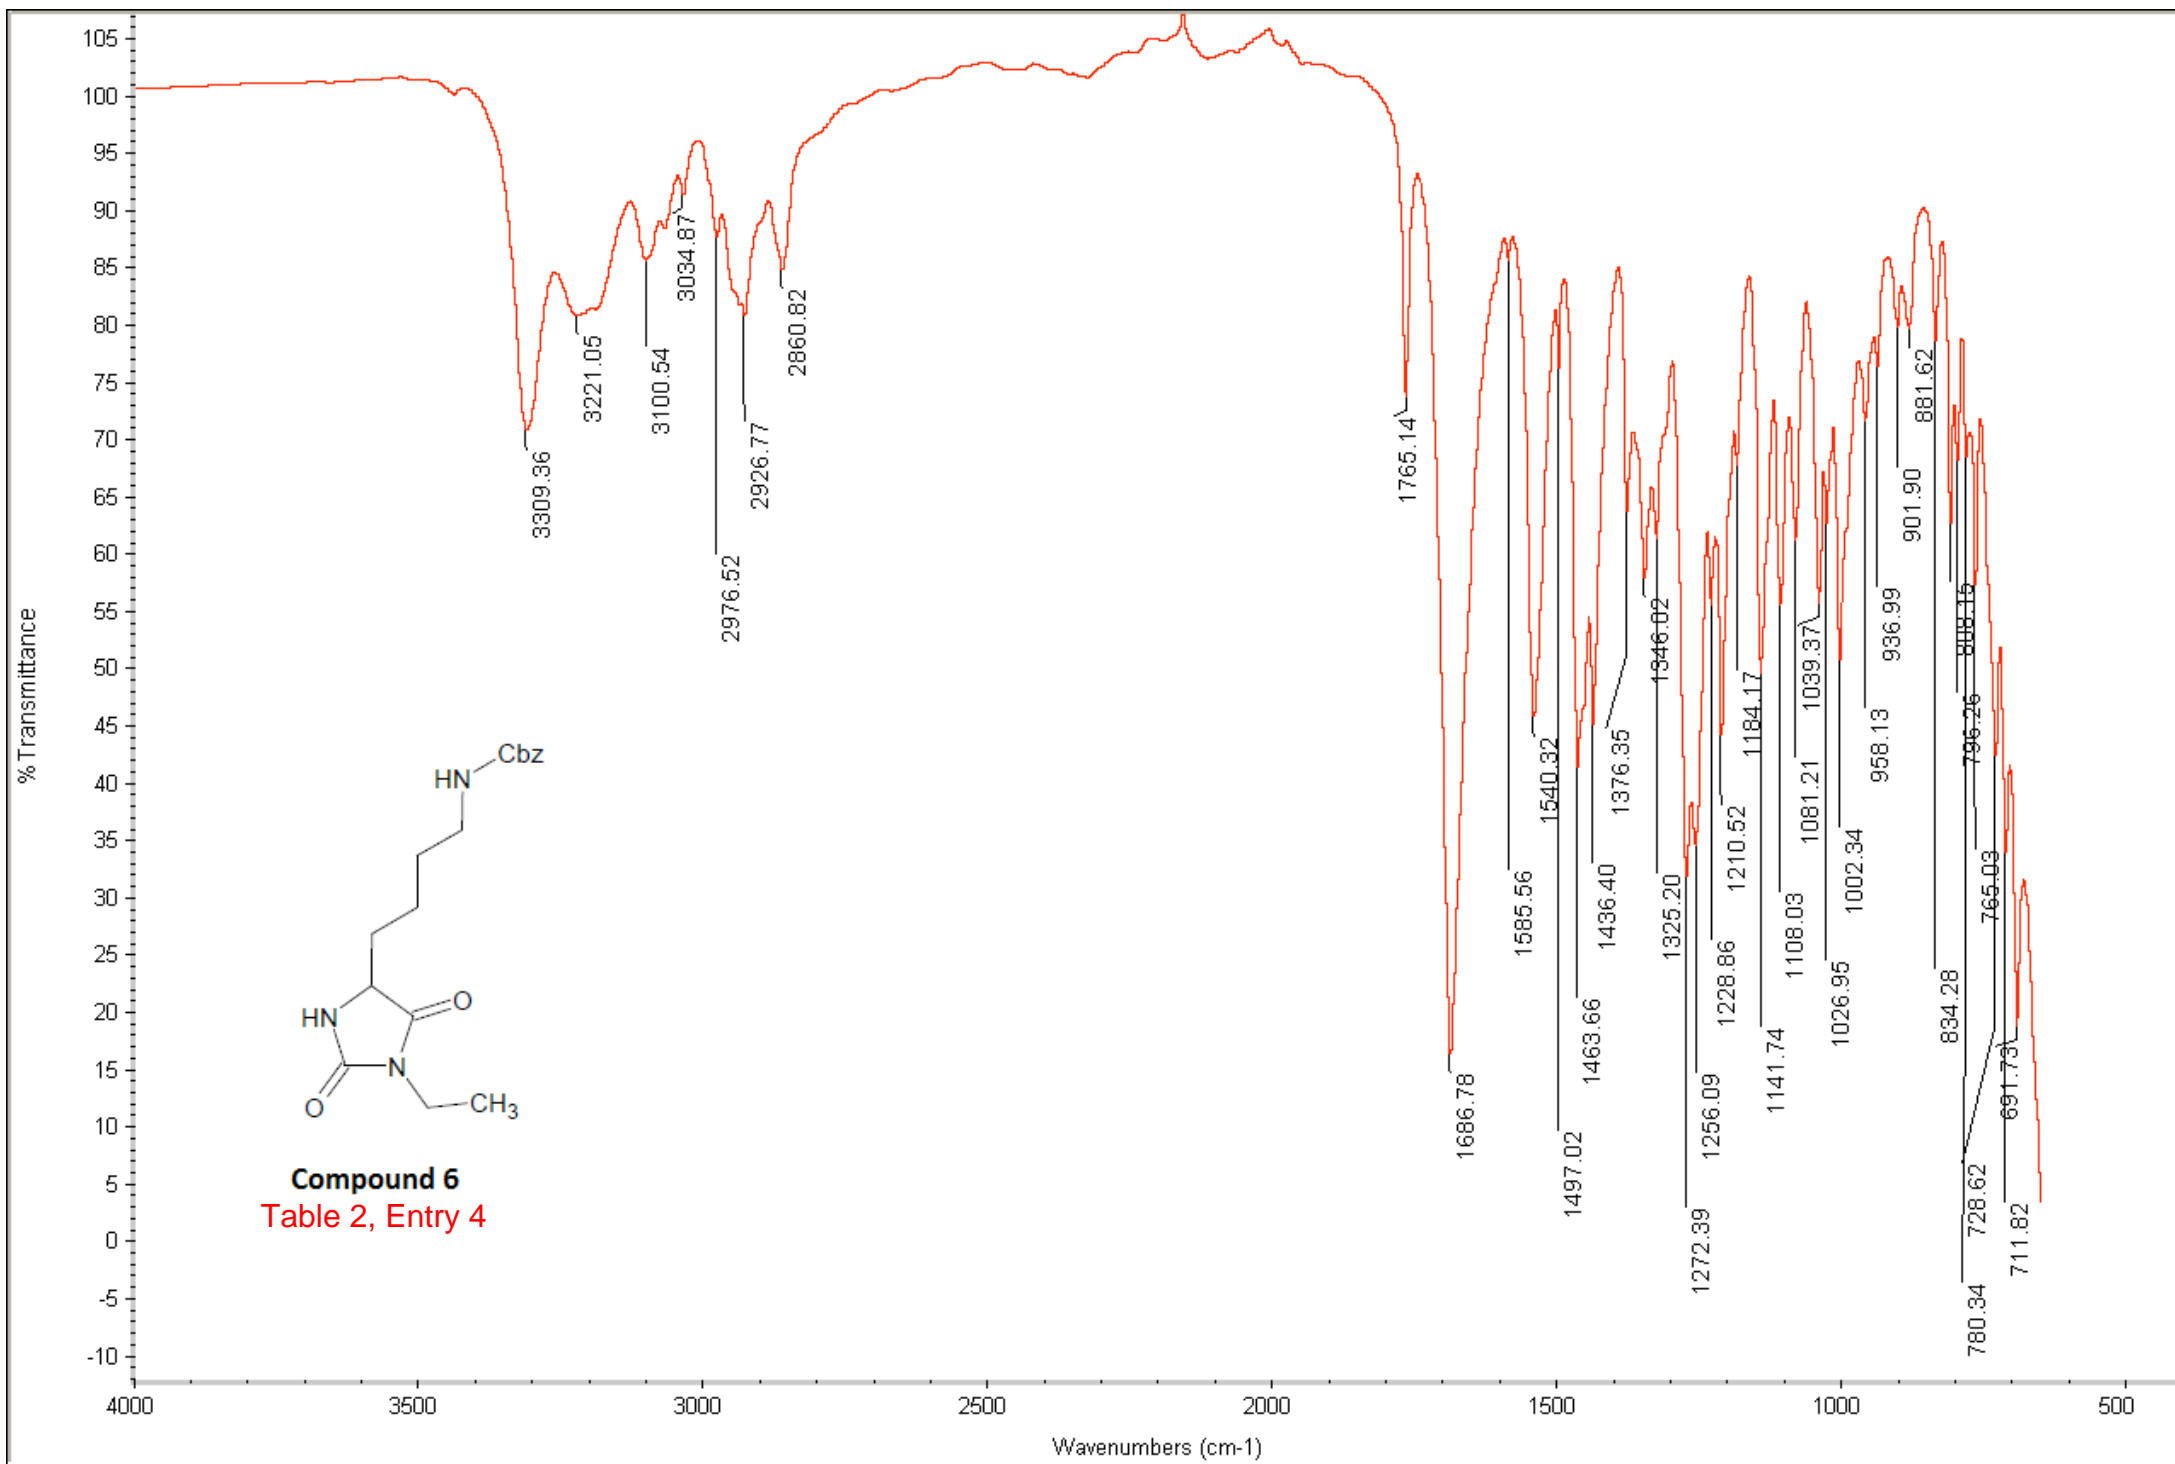

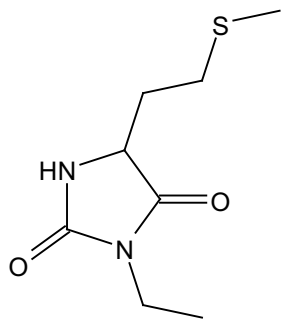

**Compound 7**  
**Table 2, entry 5**

—2178.94

—1876.86

1252.04  
1250.76  
1247.83  
1246.46  
1244.08  
1242.71  
1239.78  
1238.50

1077.86  
1070.63  
1063.59  
1056.54

795.09  
792.80  
788.22  
785.94

663.44  
659.14  
633.25  
592.45

584.58  
577.45  
569.88  
362.74  
355.51

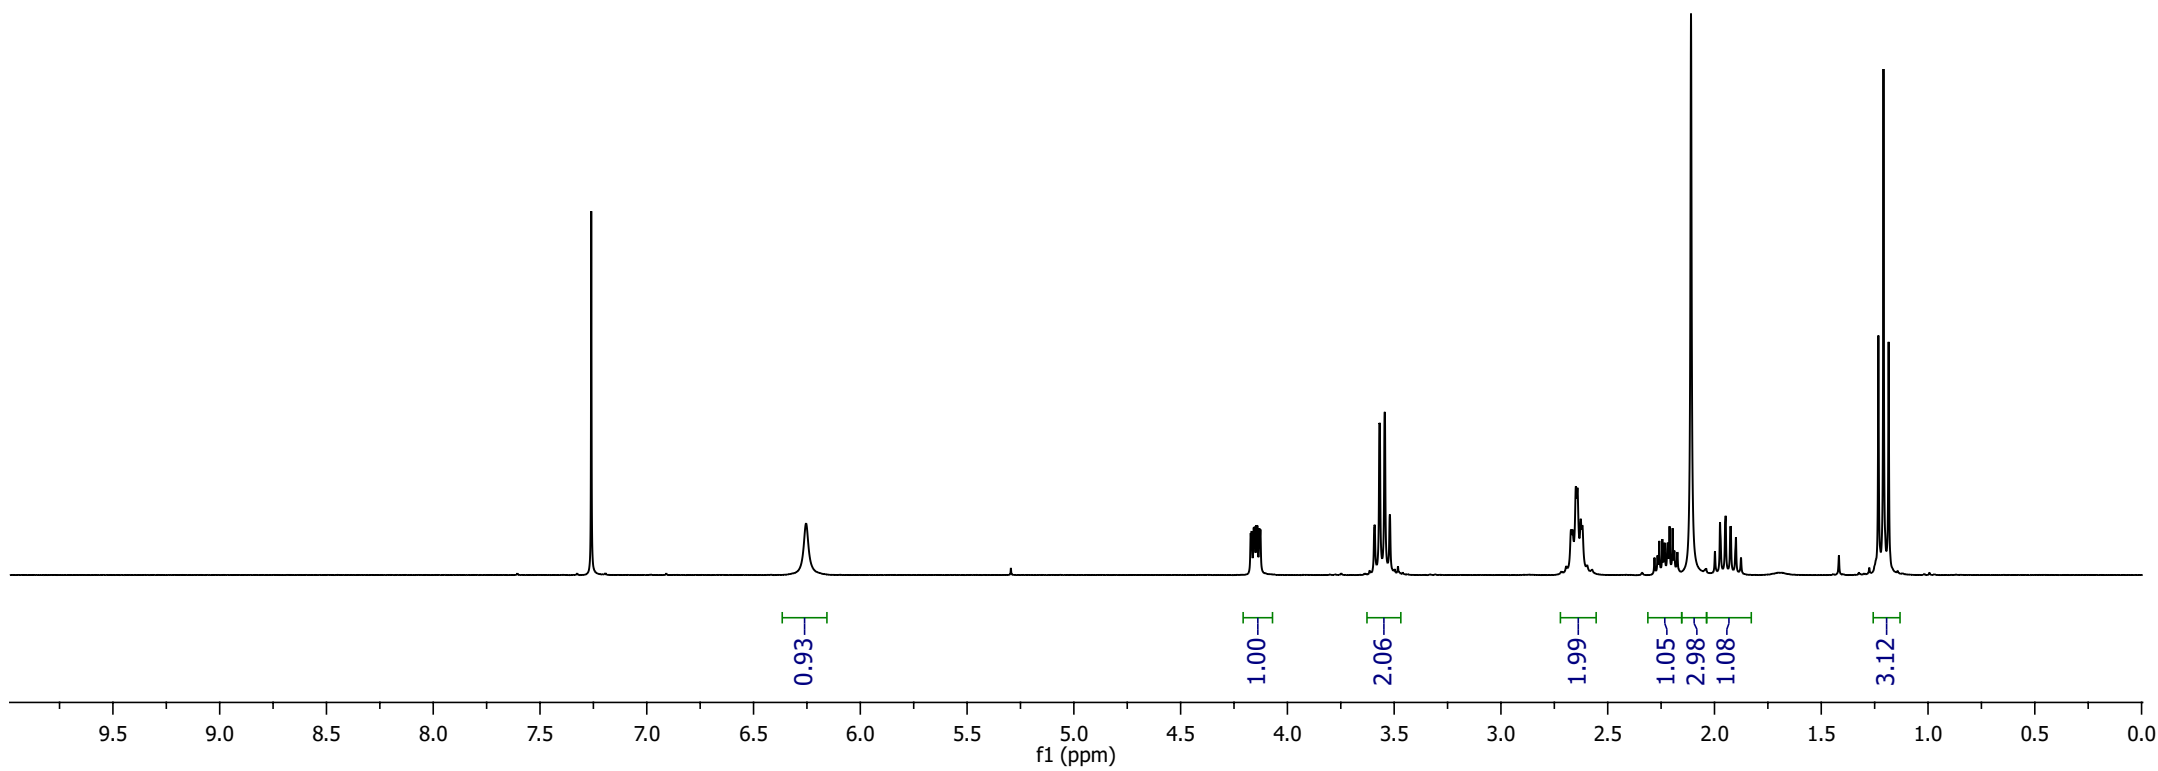

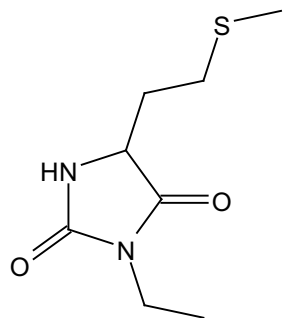

**Compound 7**  
**Table 2, entry 5**

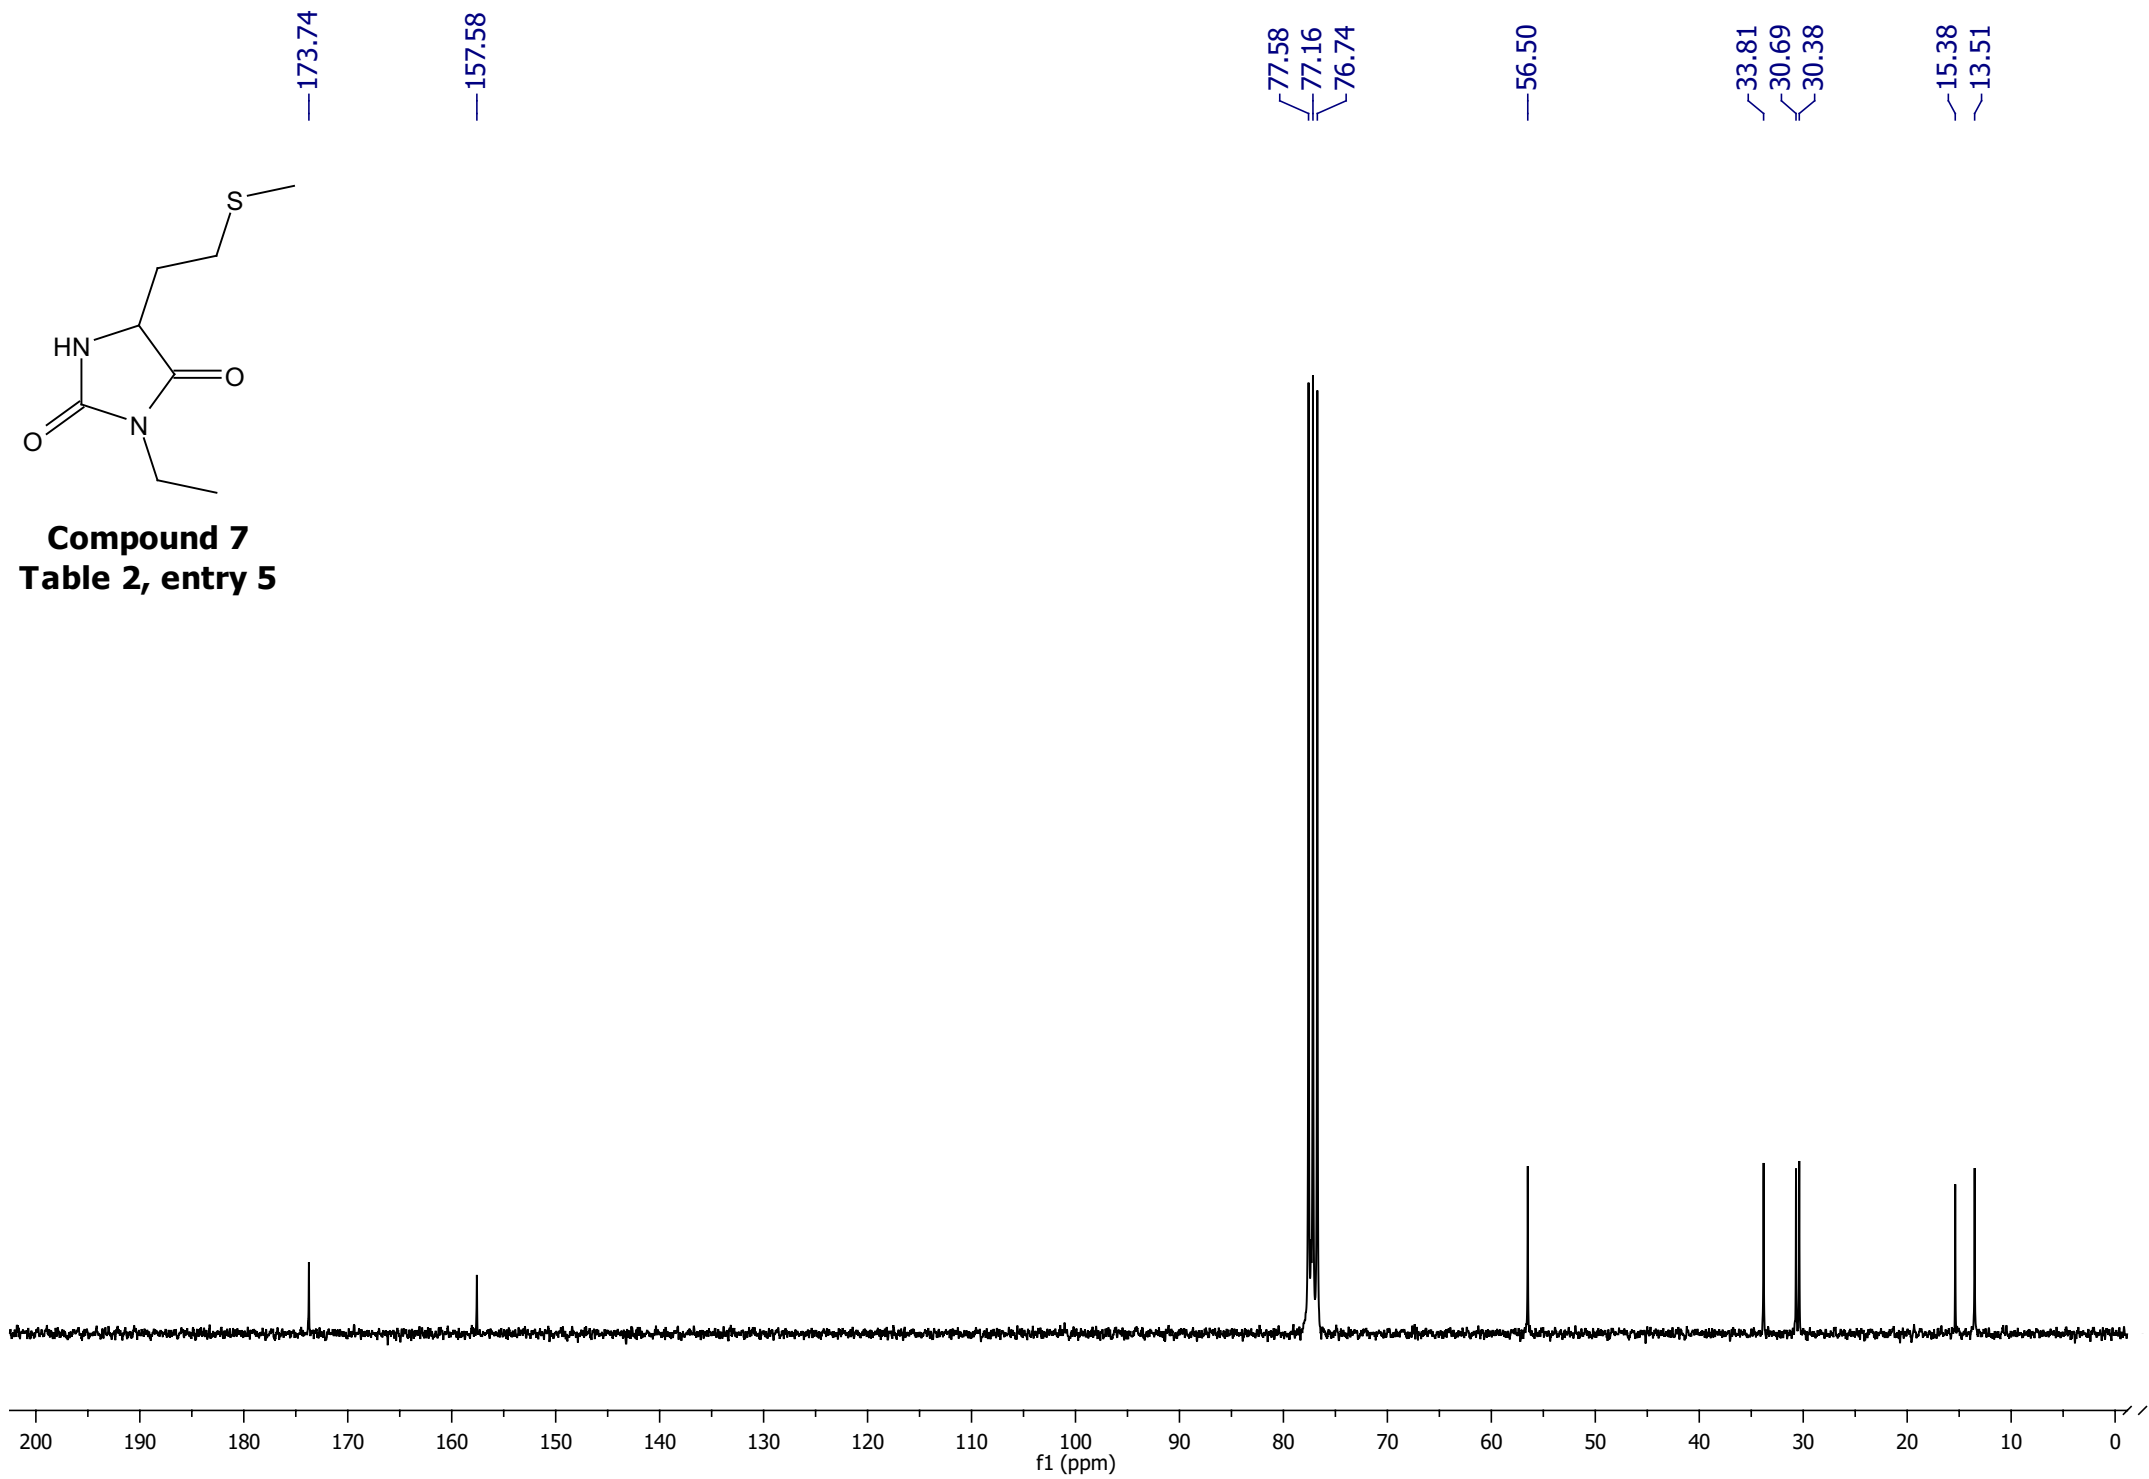

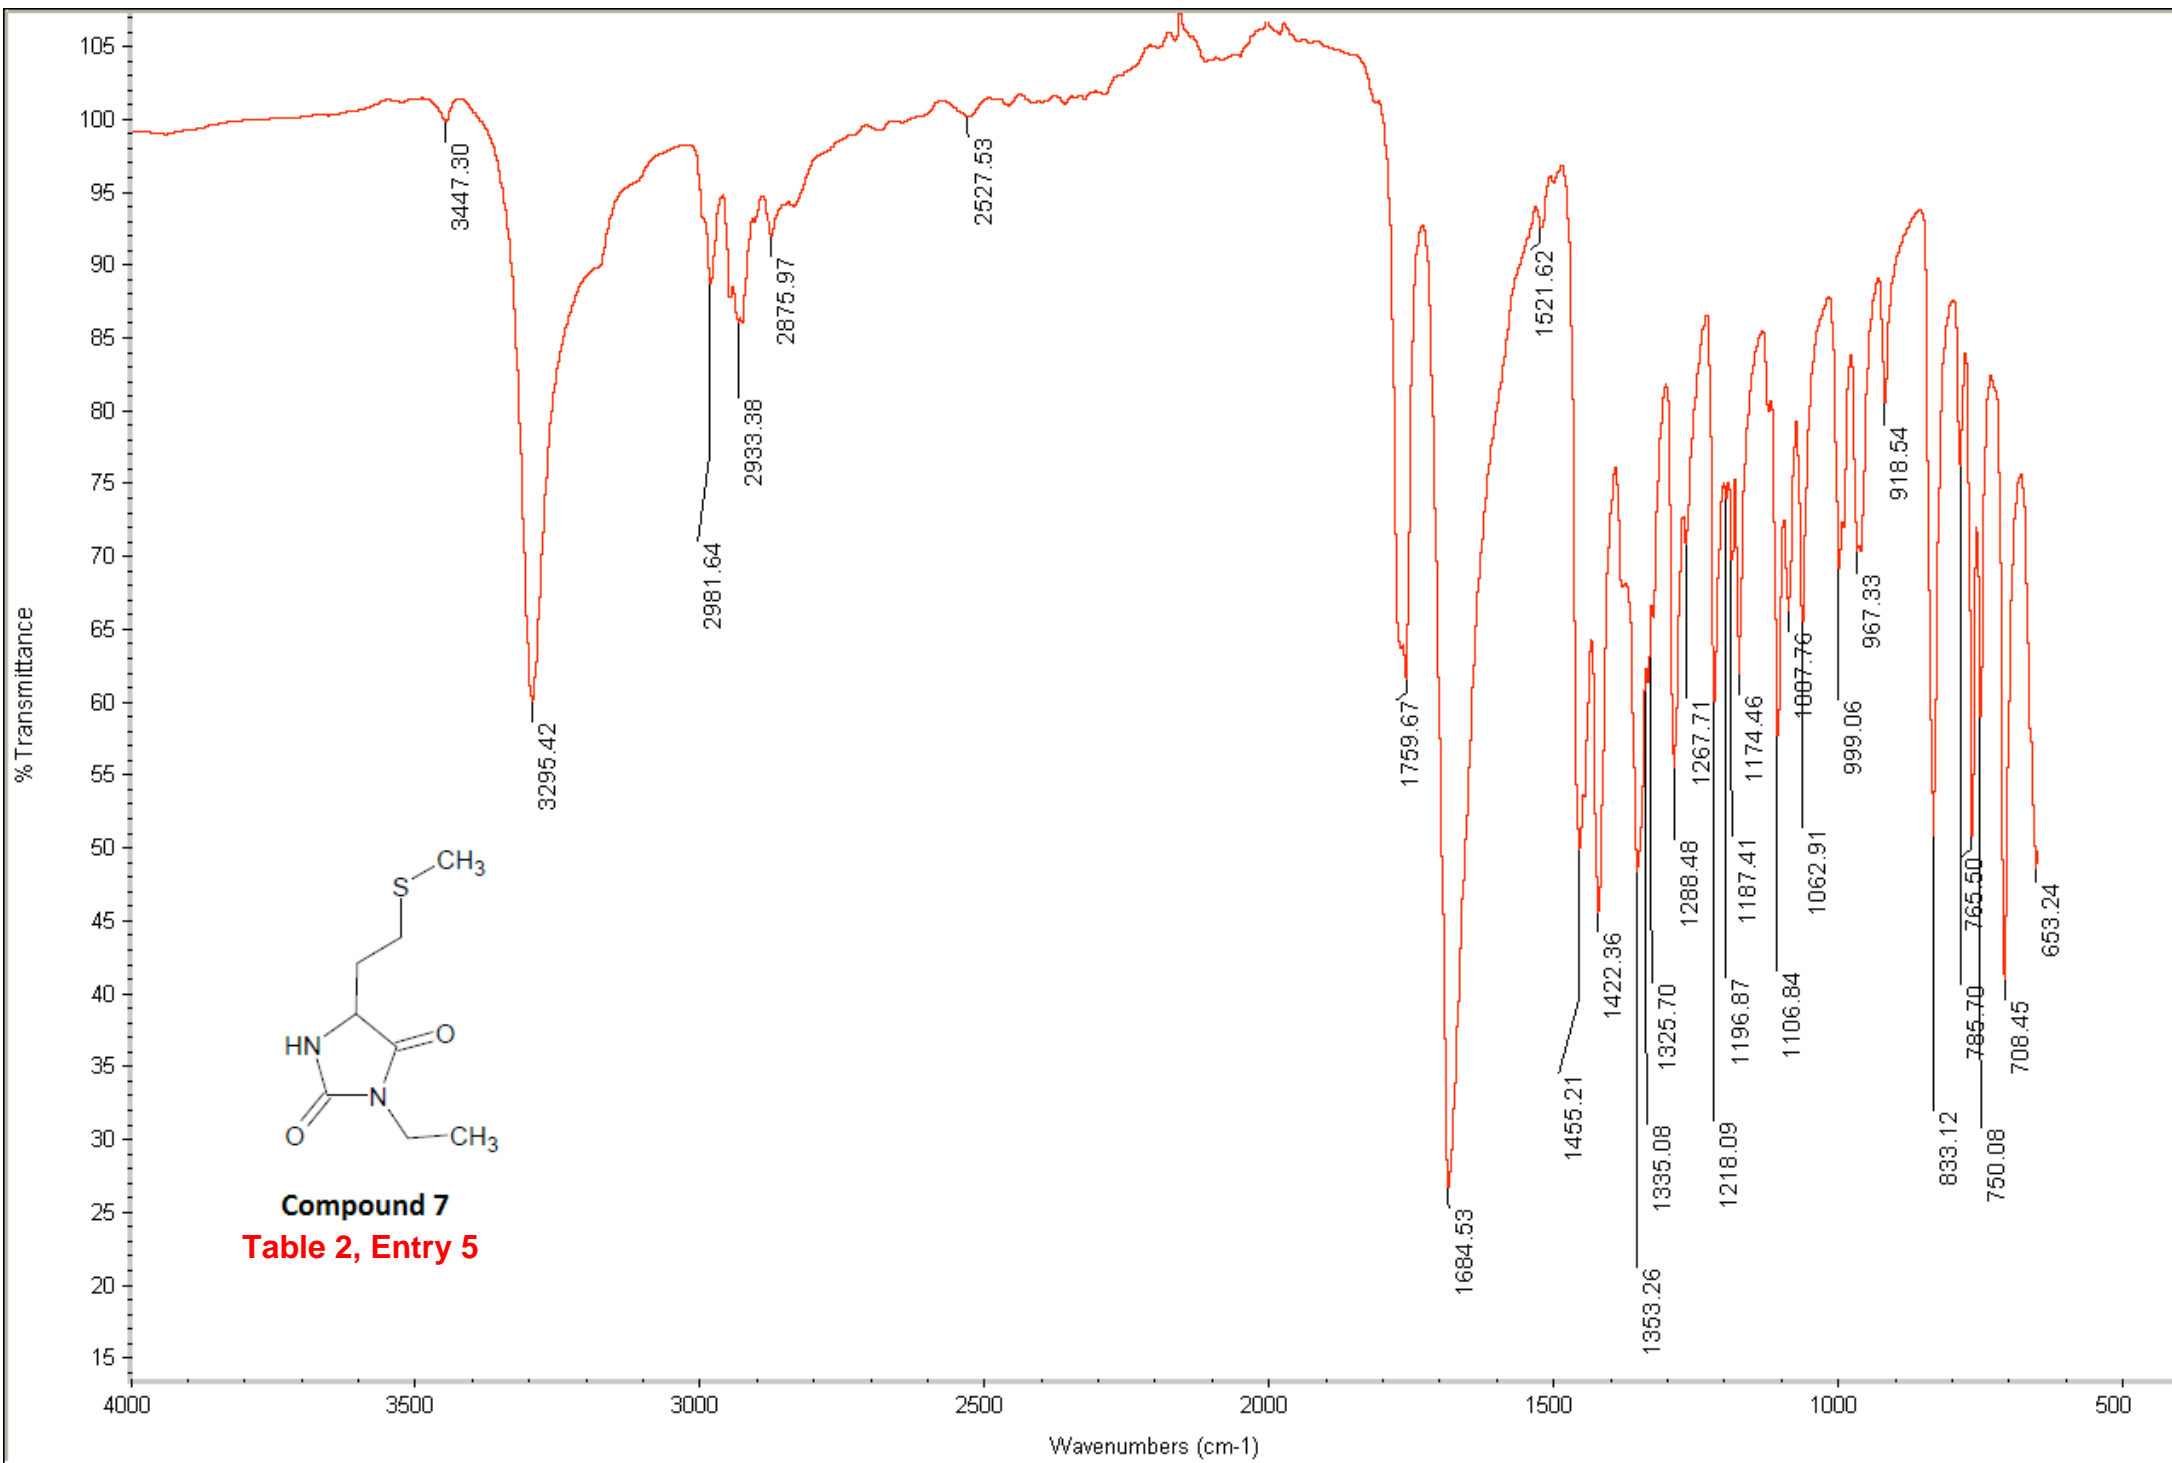

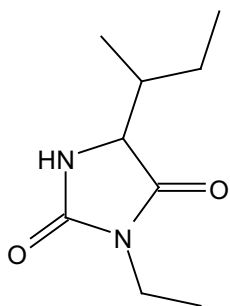

**Compound 8**  
**Table 2, entry 6**

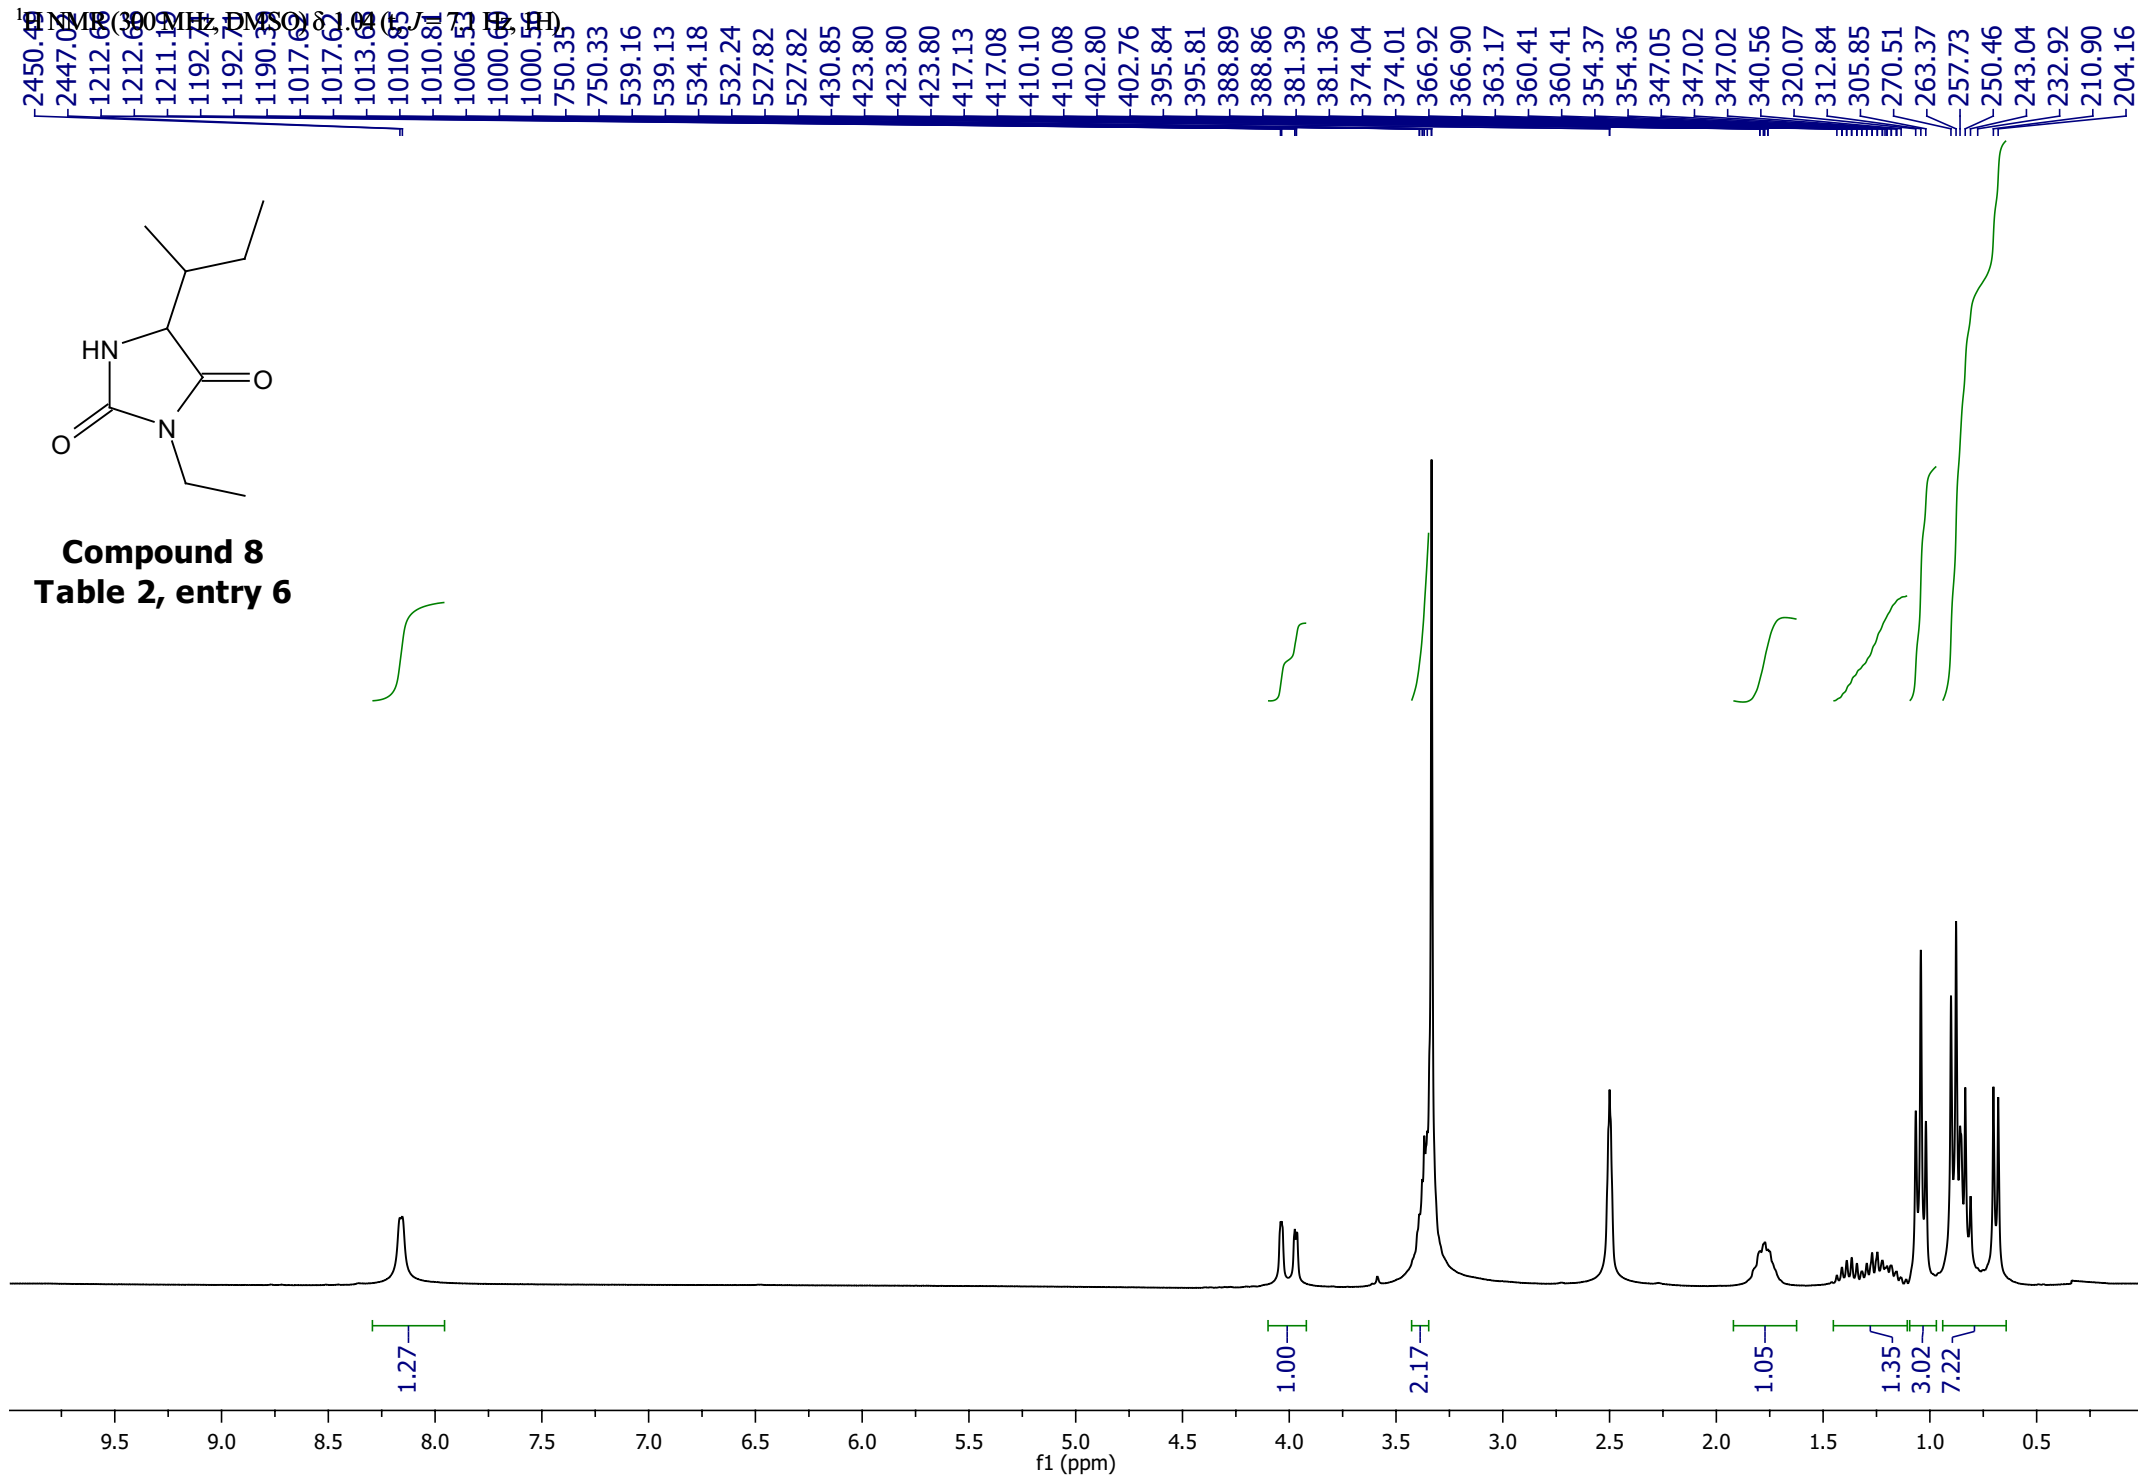

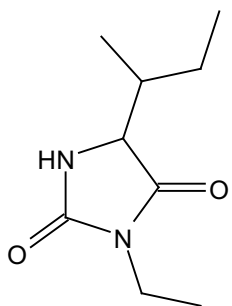

**Compound 8**  
**Table 2, entry 6**

173.92  
173.45

157.15  
156.93

60.76  
59.62  
40.34  
40.07  
39.80  
39.52  
39.24  
38.96  
38.69  
36.10  
32.41  
25.54  
23.27  
14.92  
13.28  
12.78  
11.64

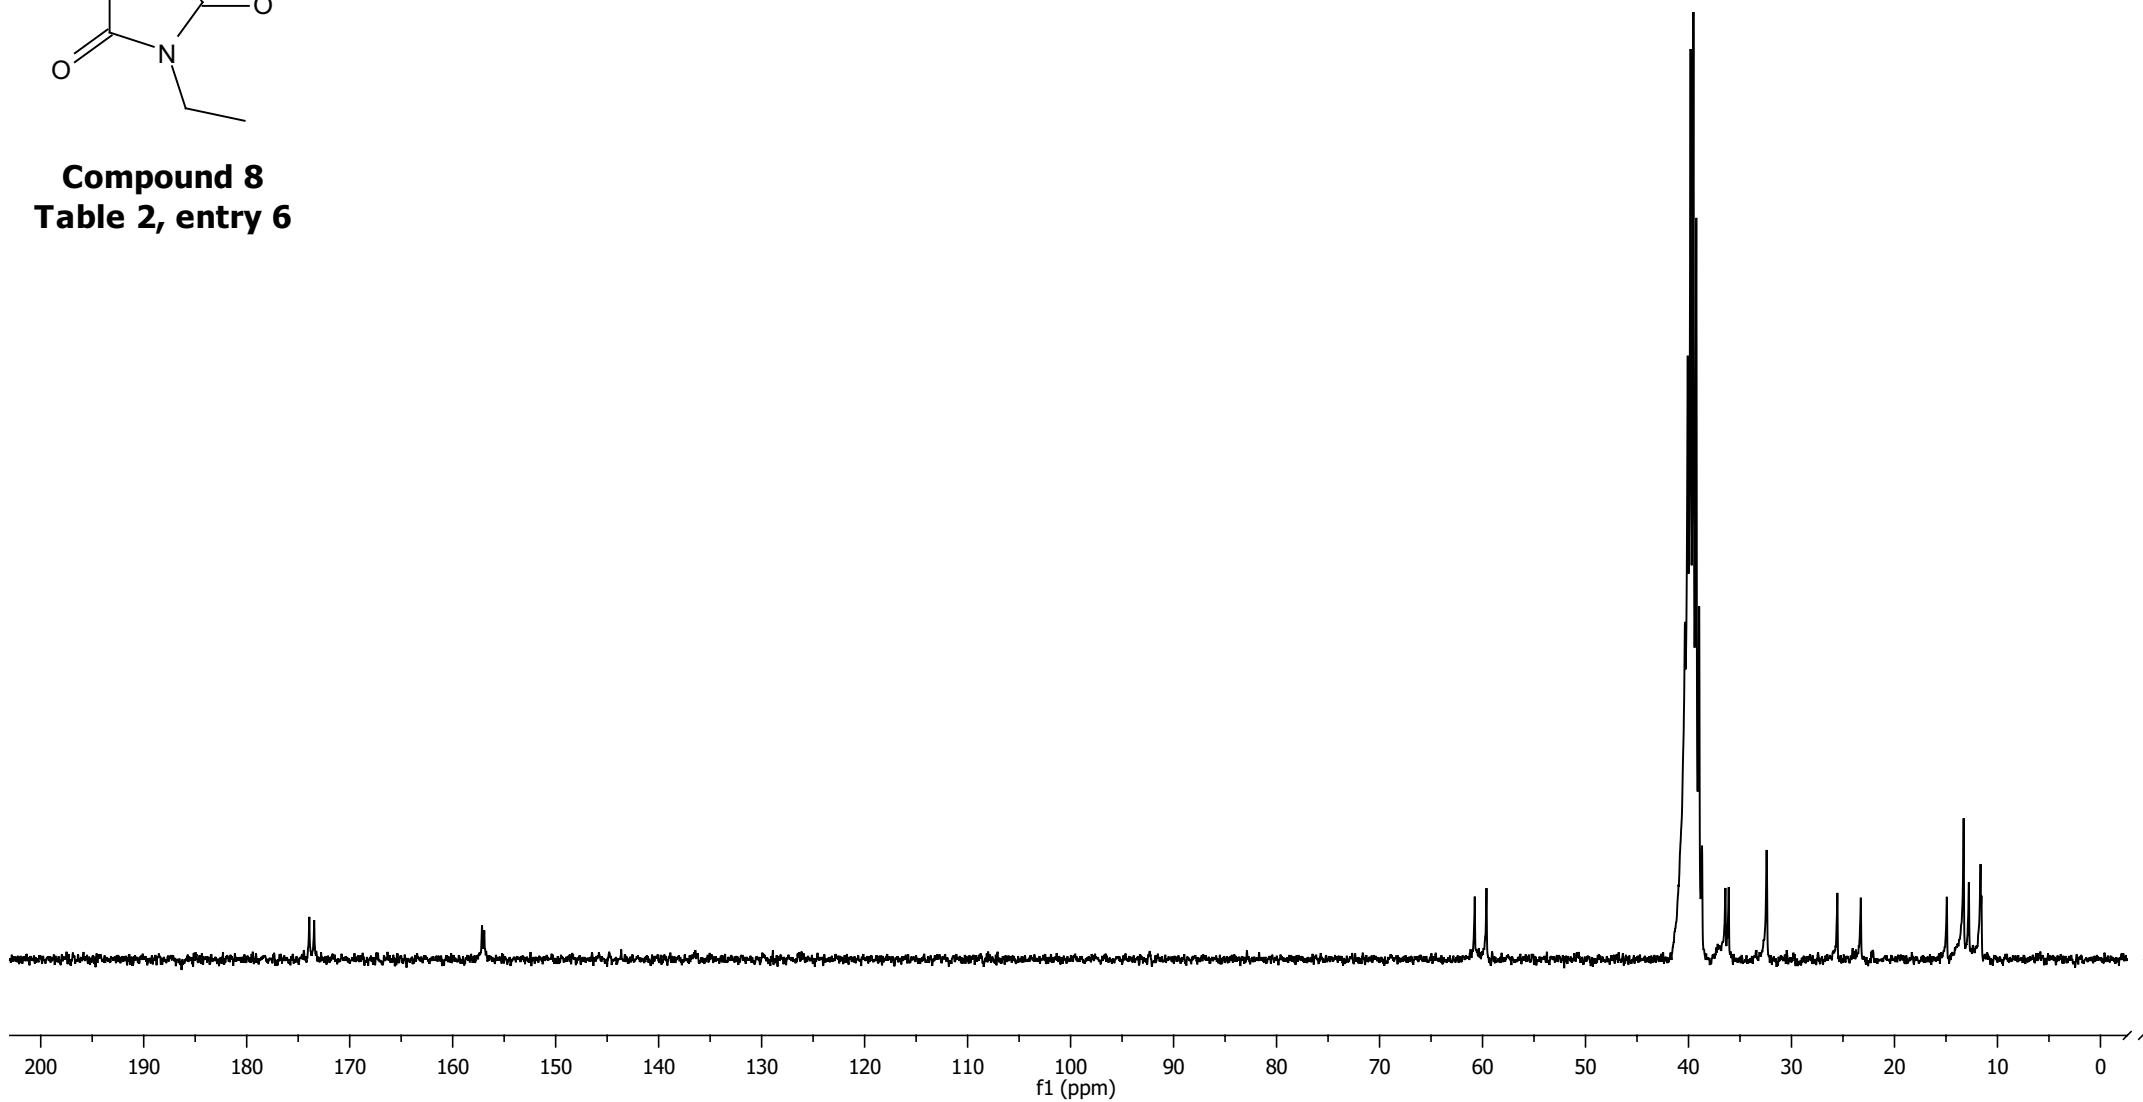

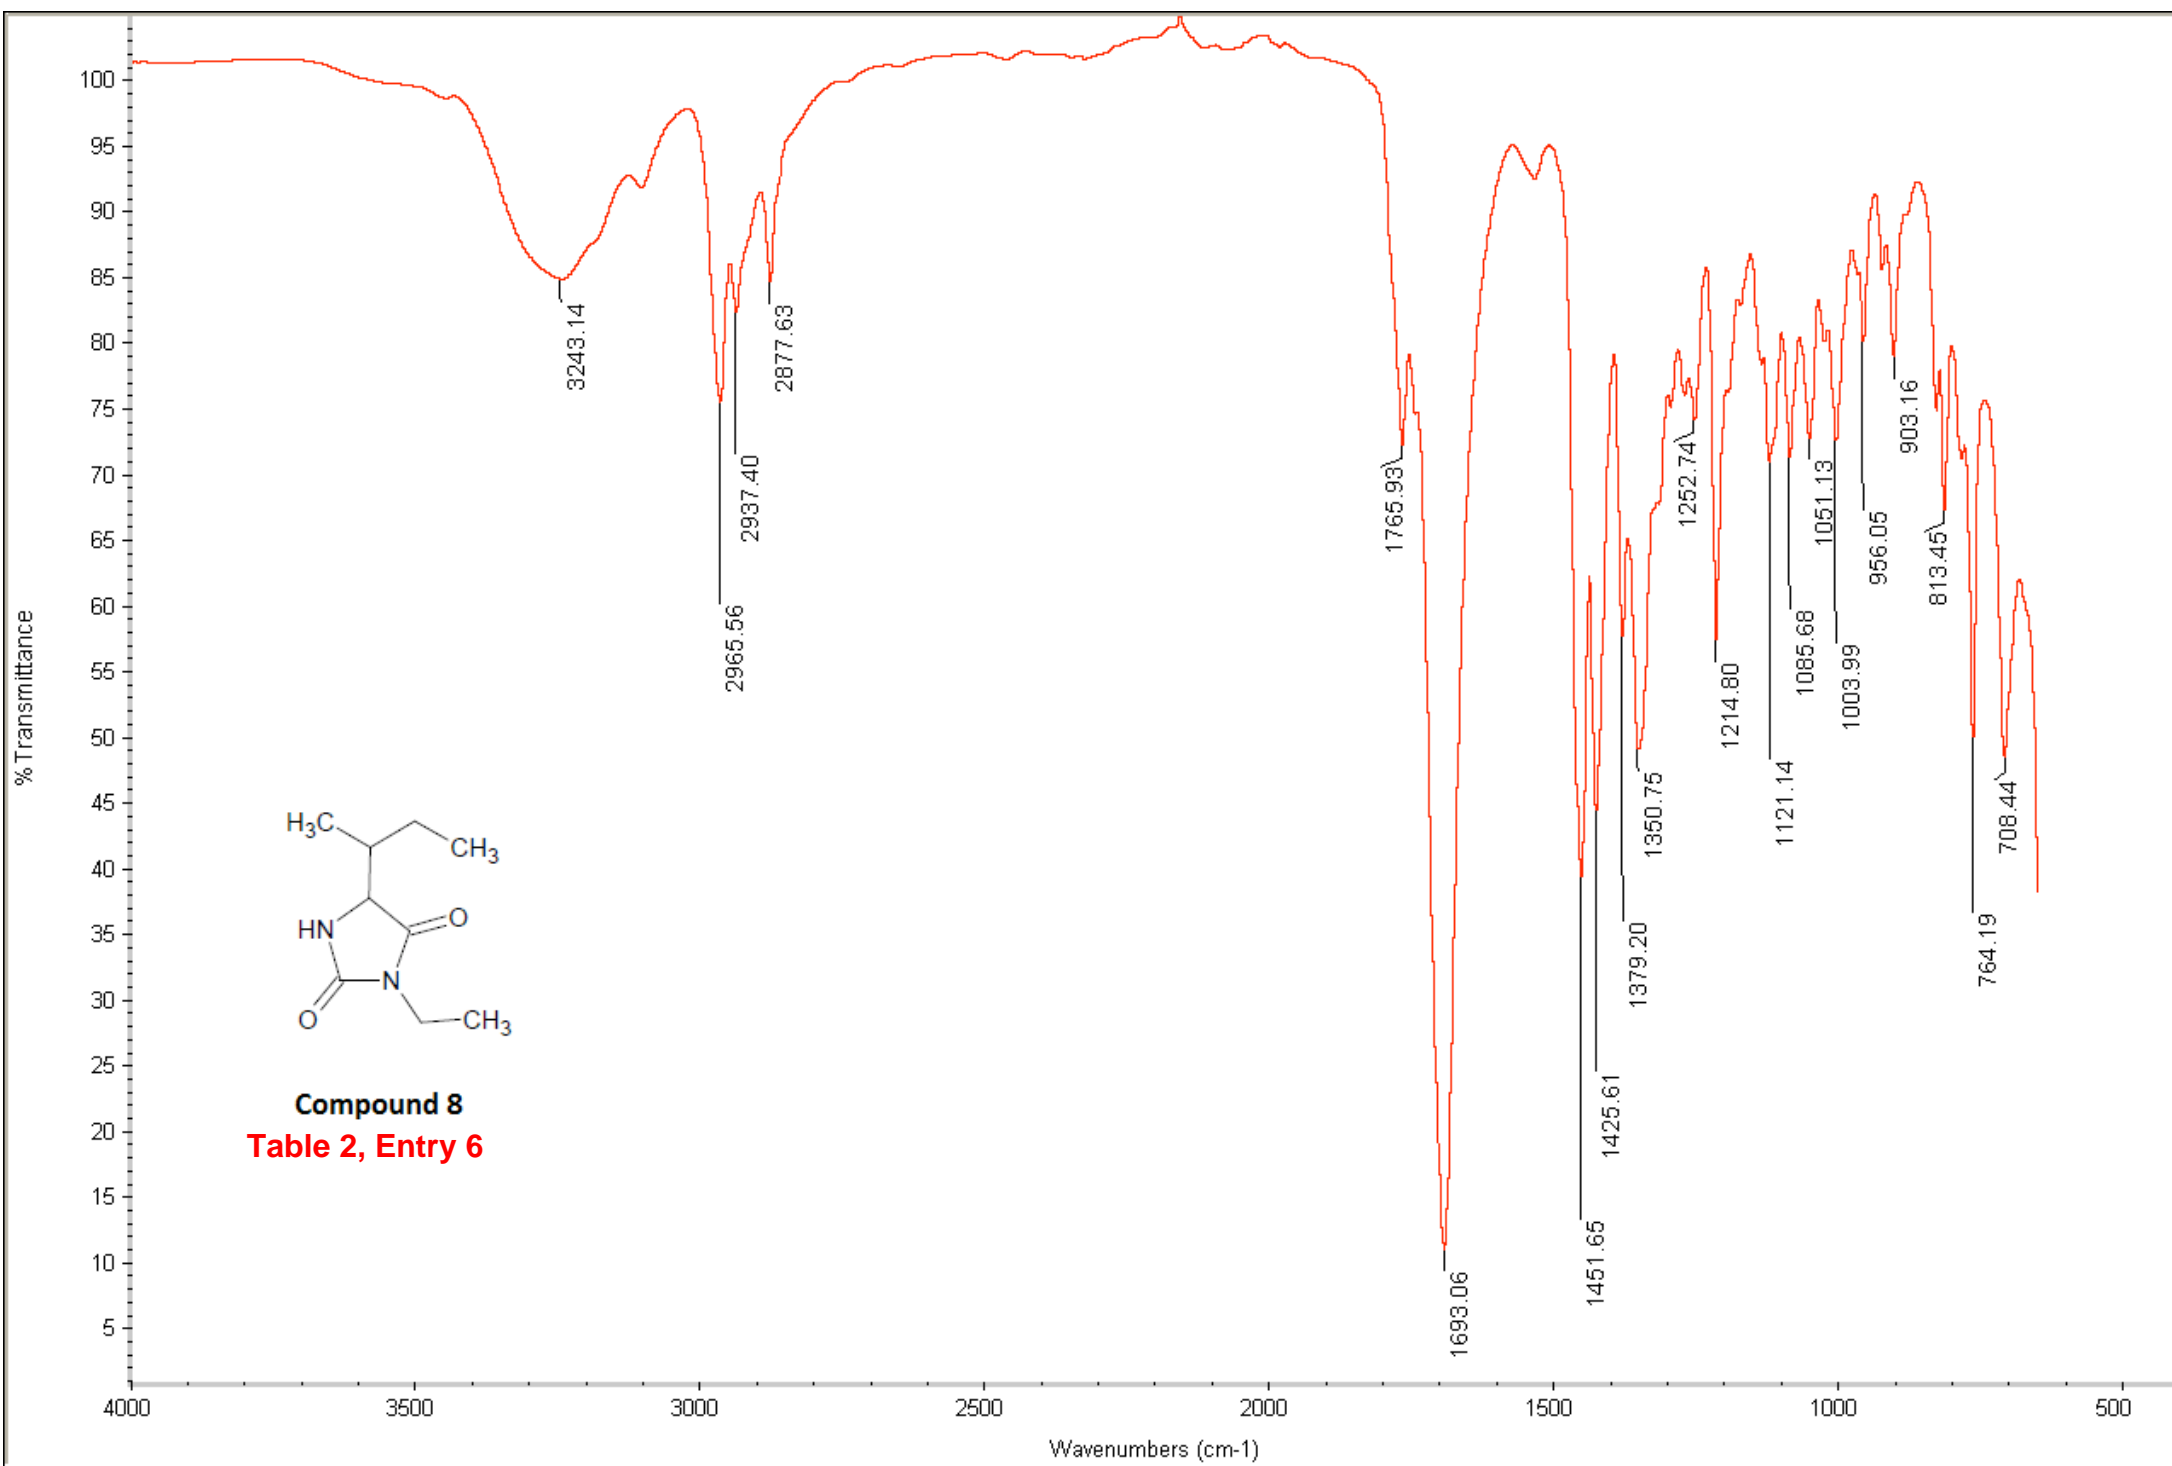

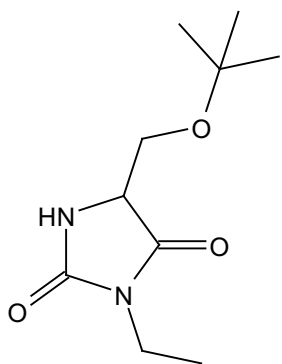

**Compound 9**  
**Table 2, entry 7**

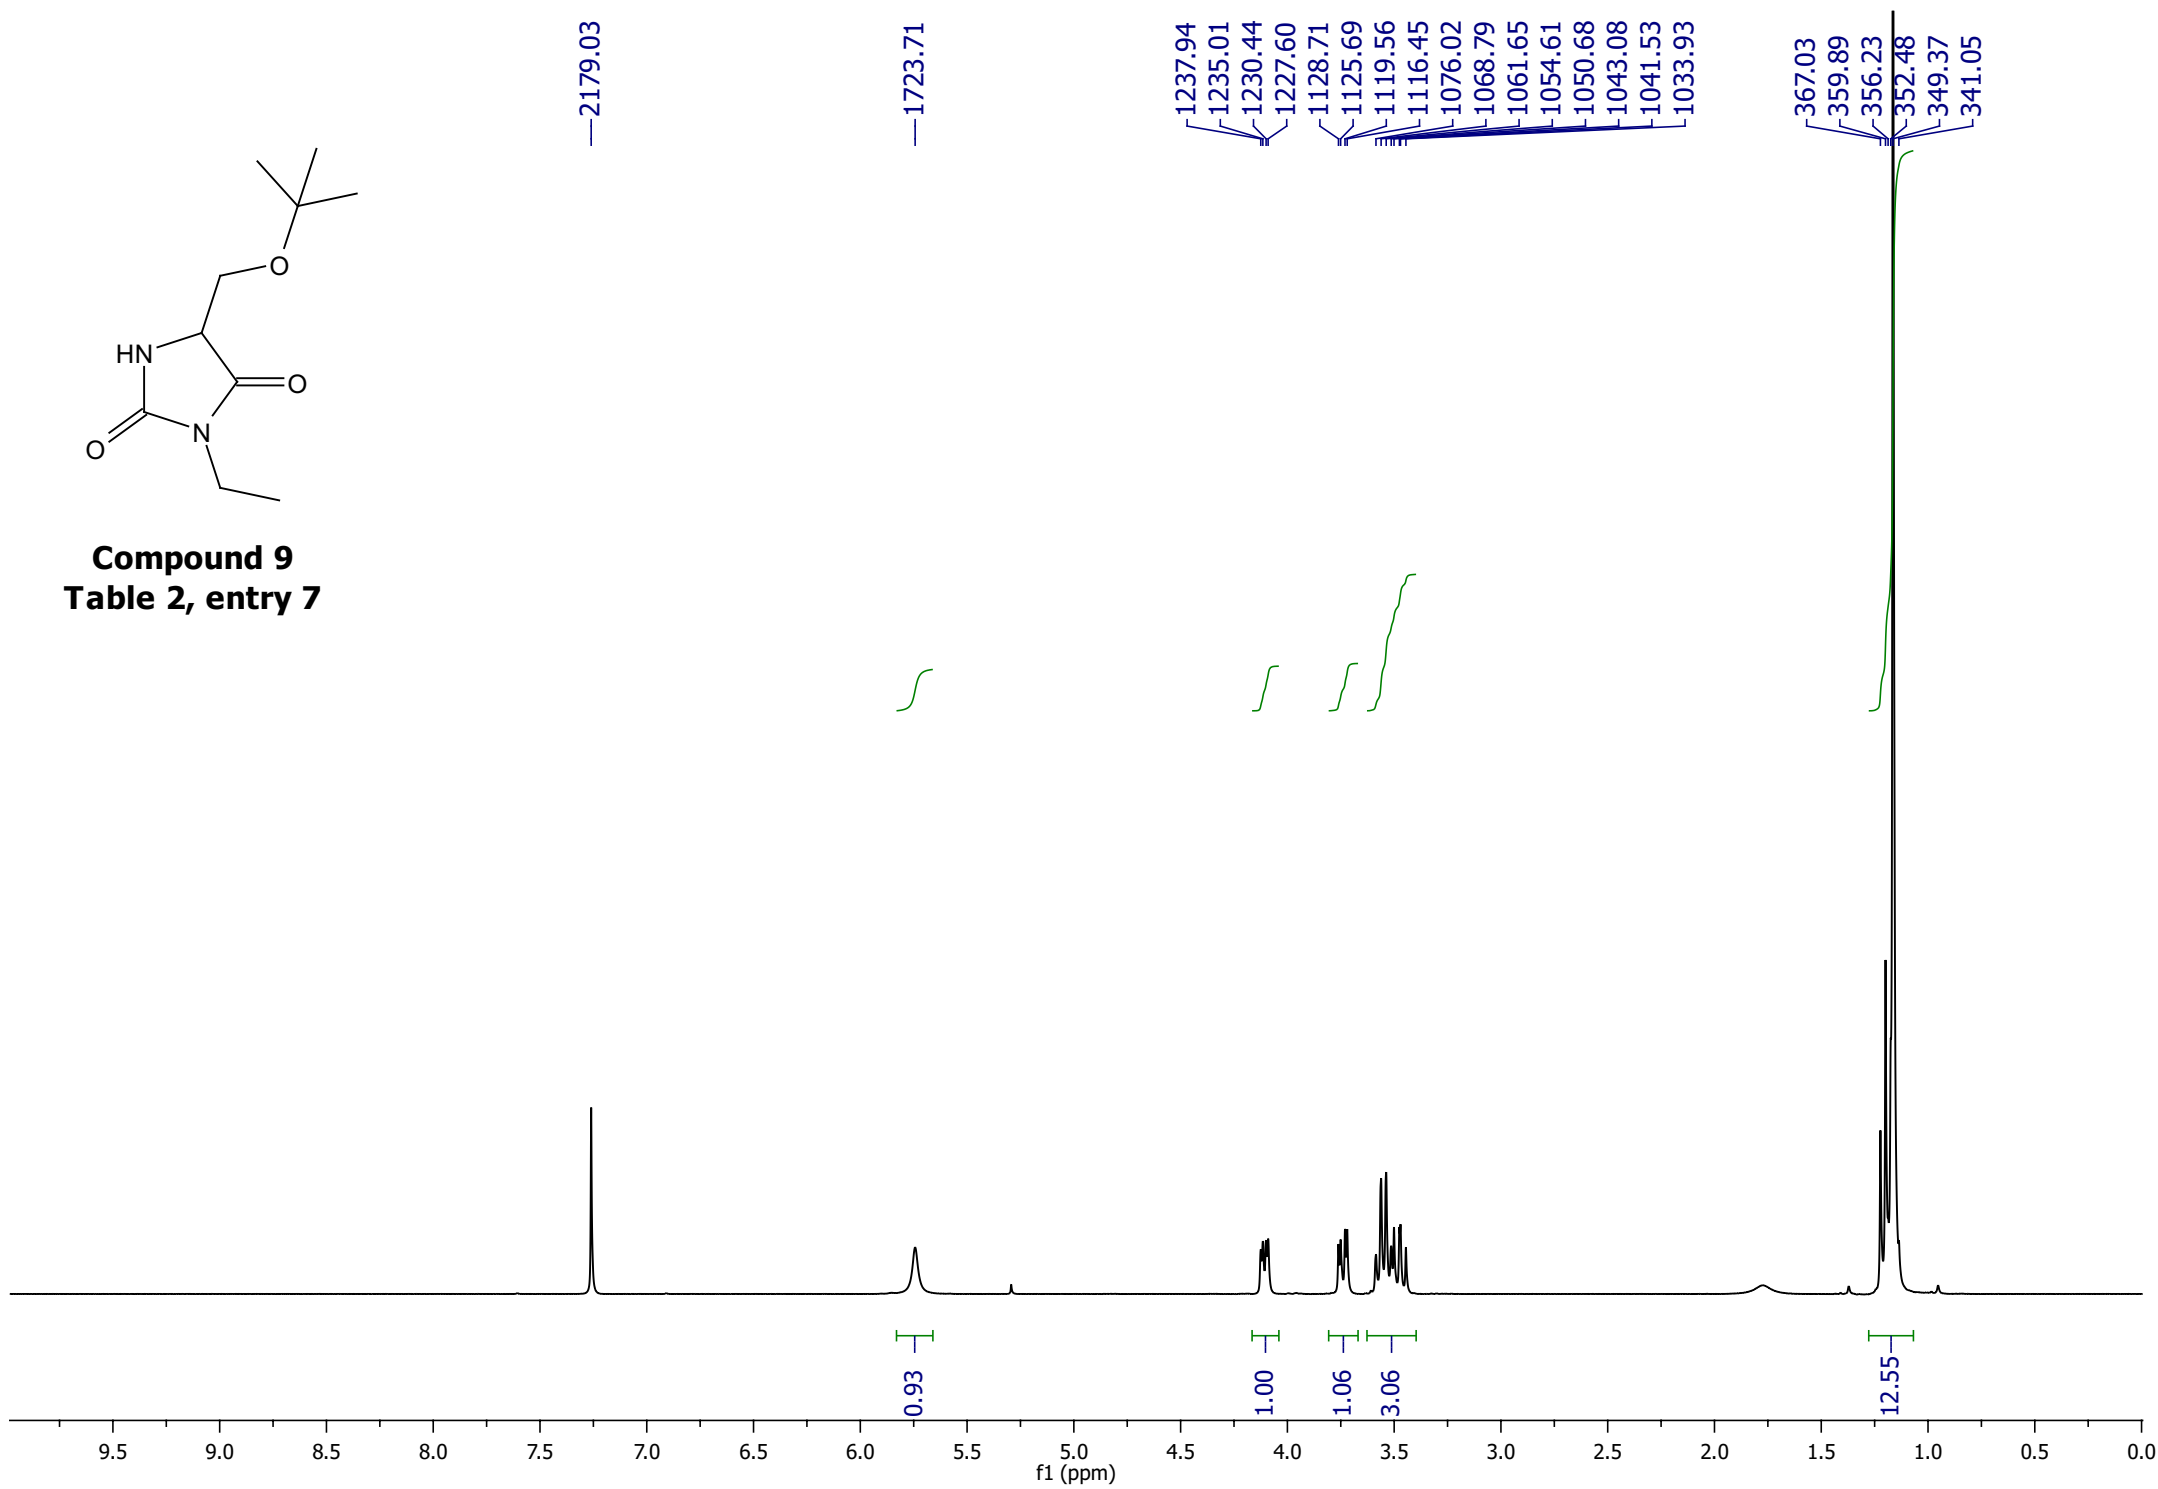



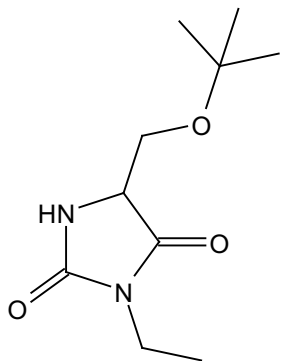

**Compound 9**  
**Table 2, entry 7**

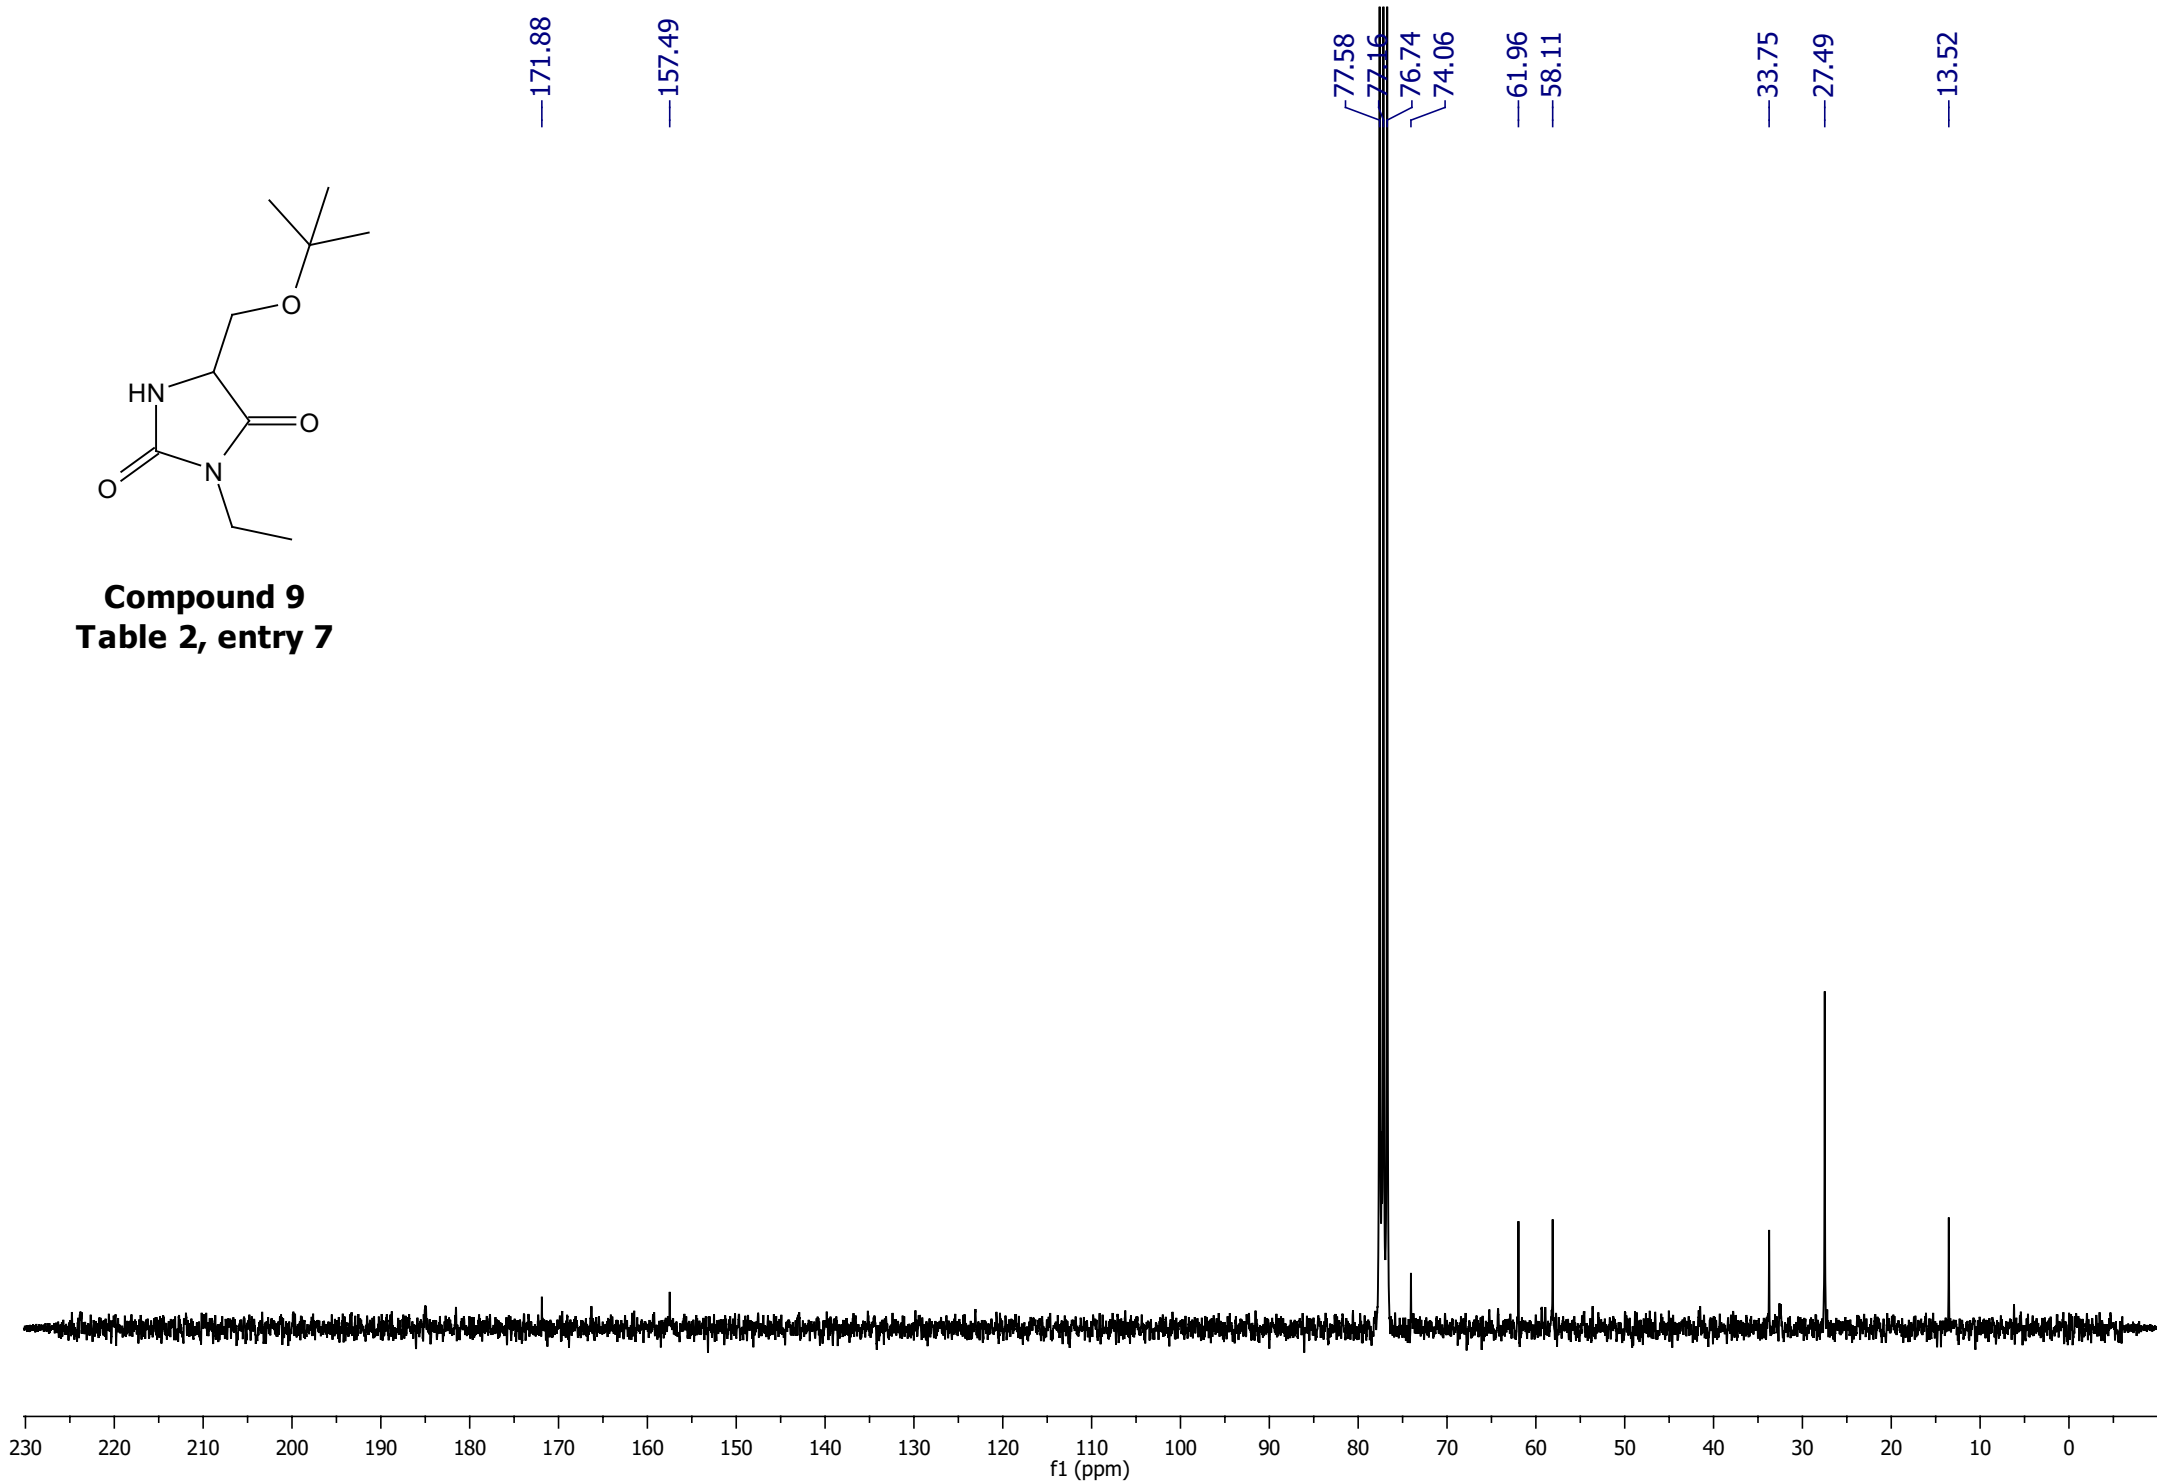

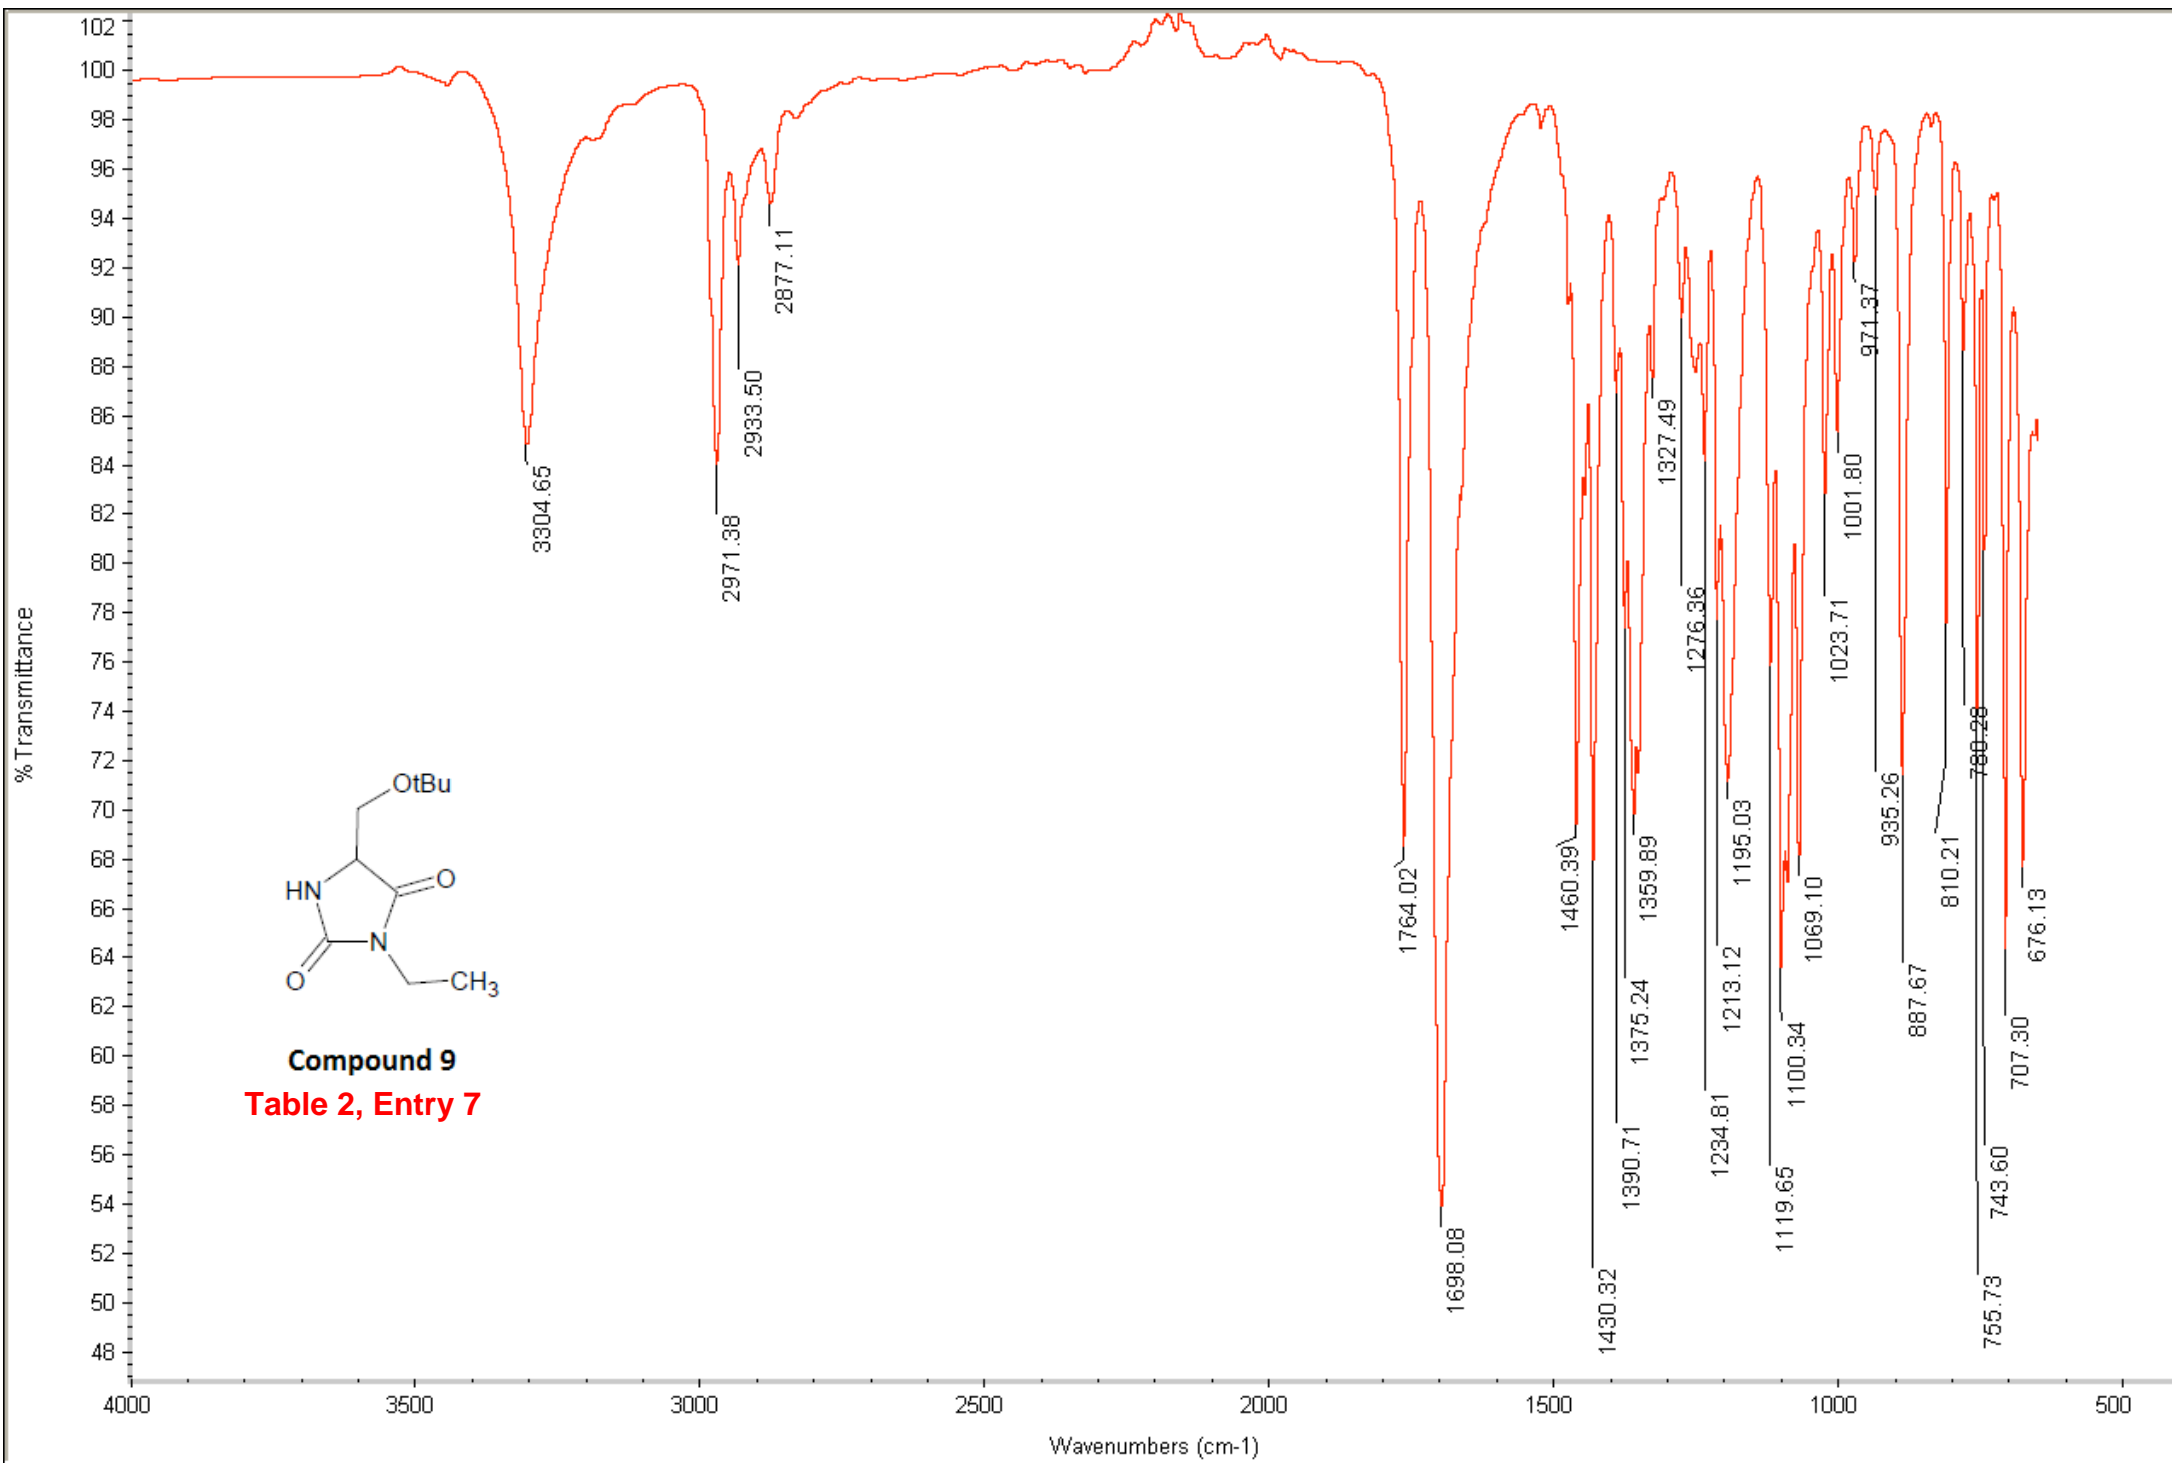

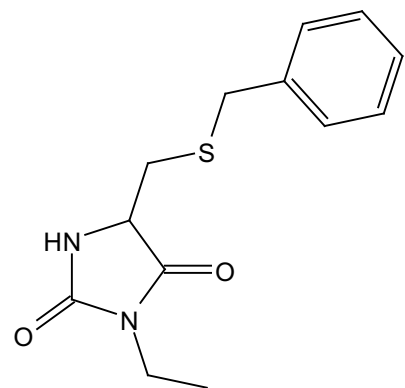

**Compound 10**  
**Table 2, entry 8**

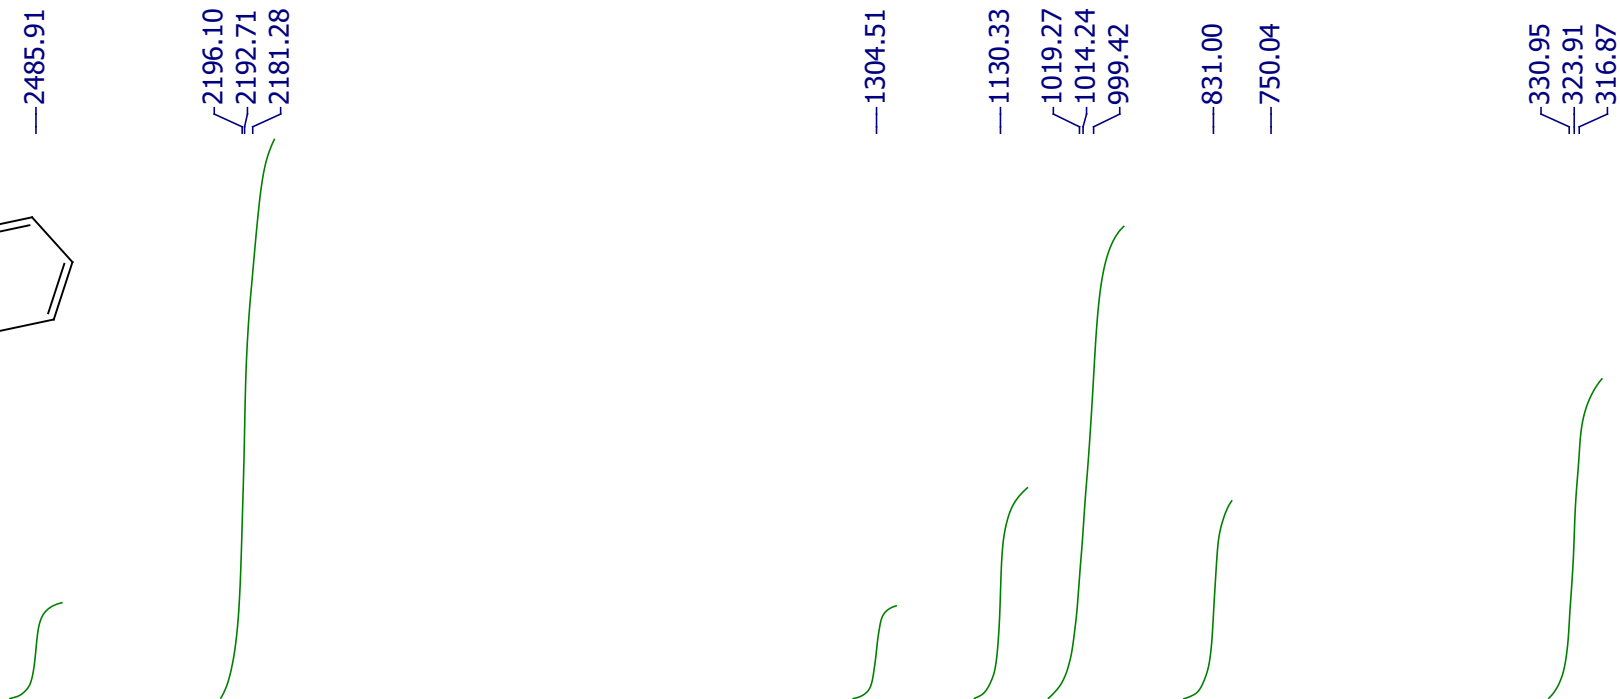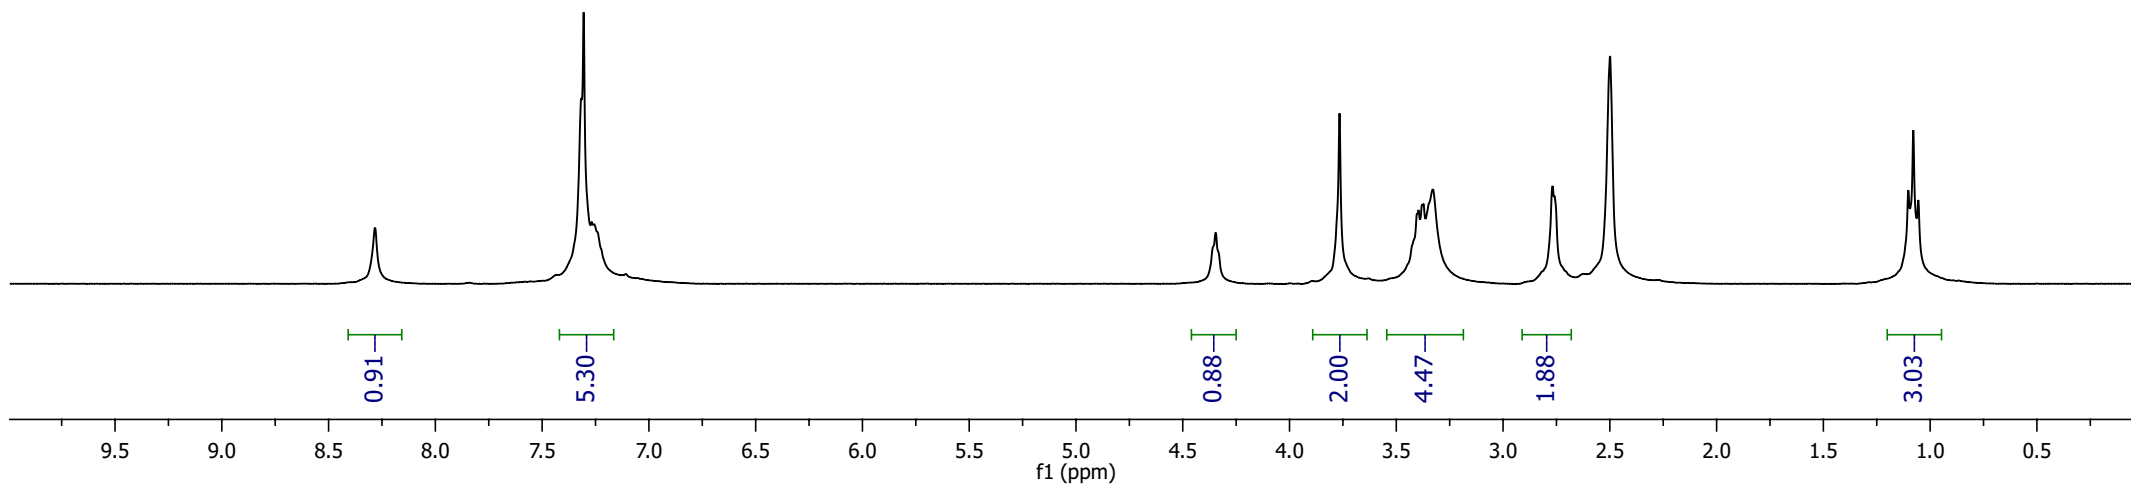

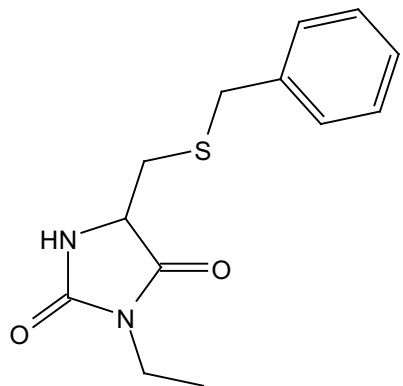

**Compound 10**  
**Table 2, entry 8**

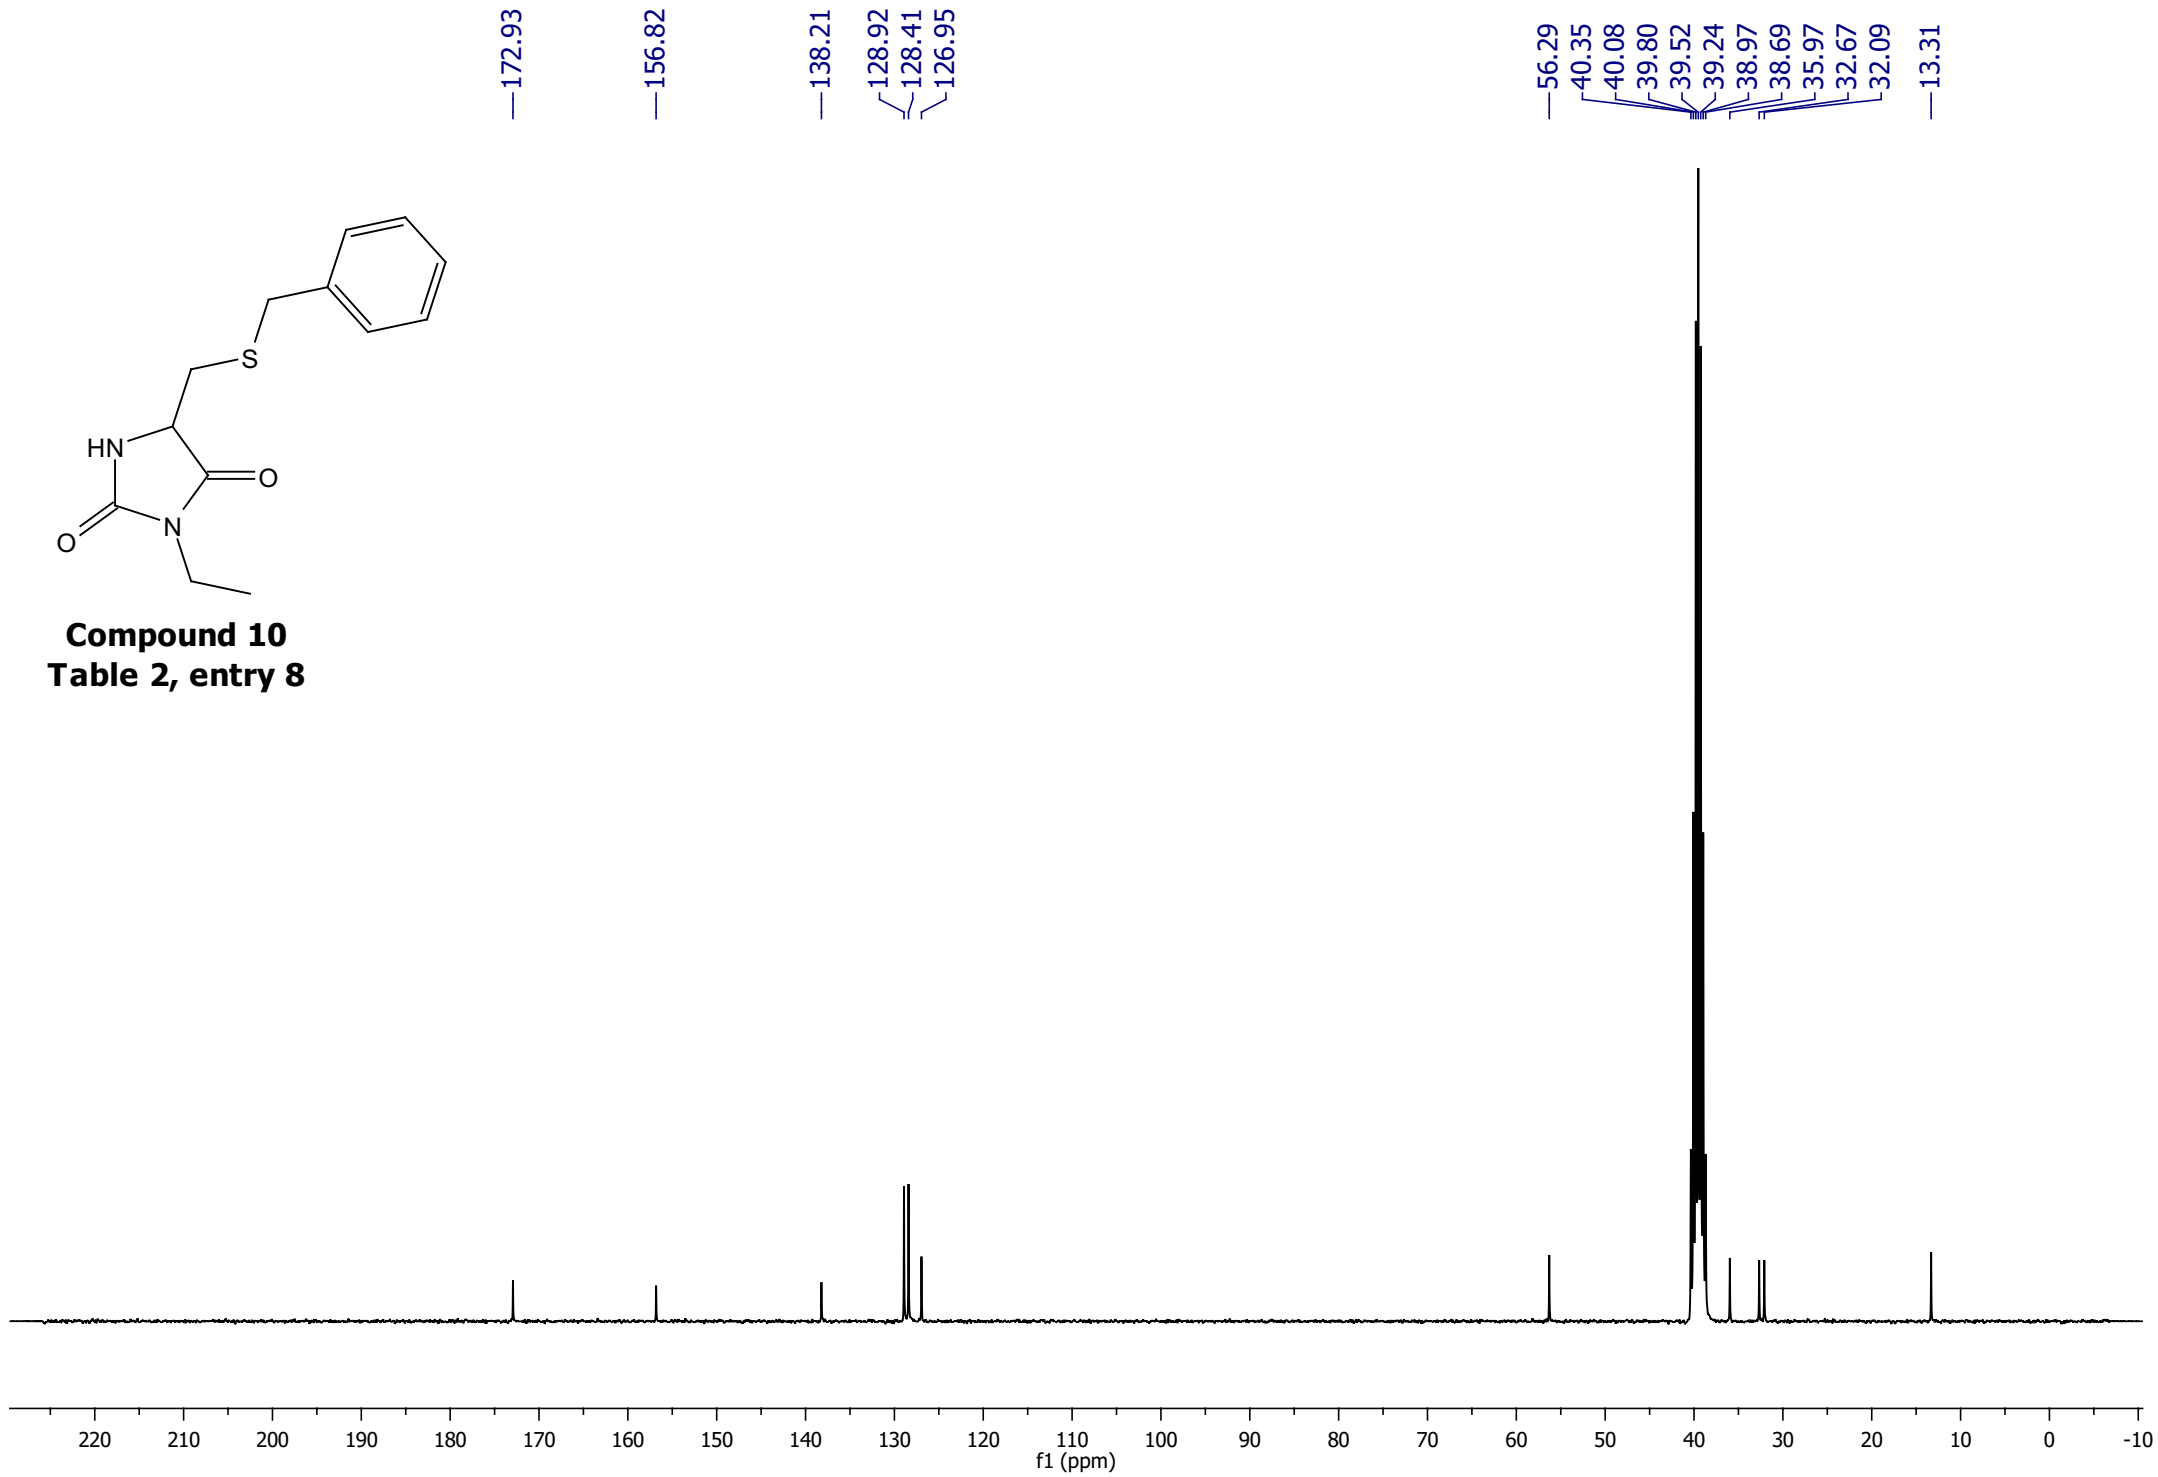

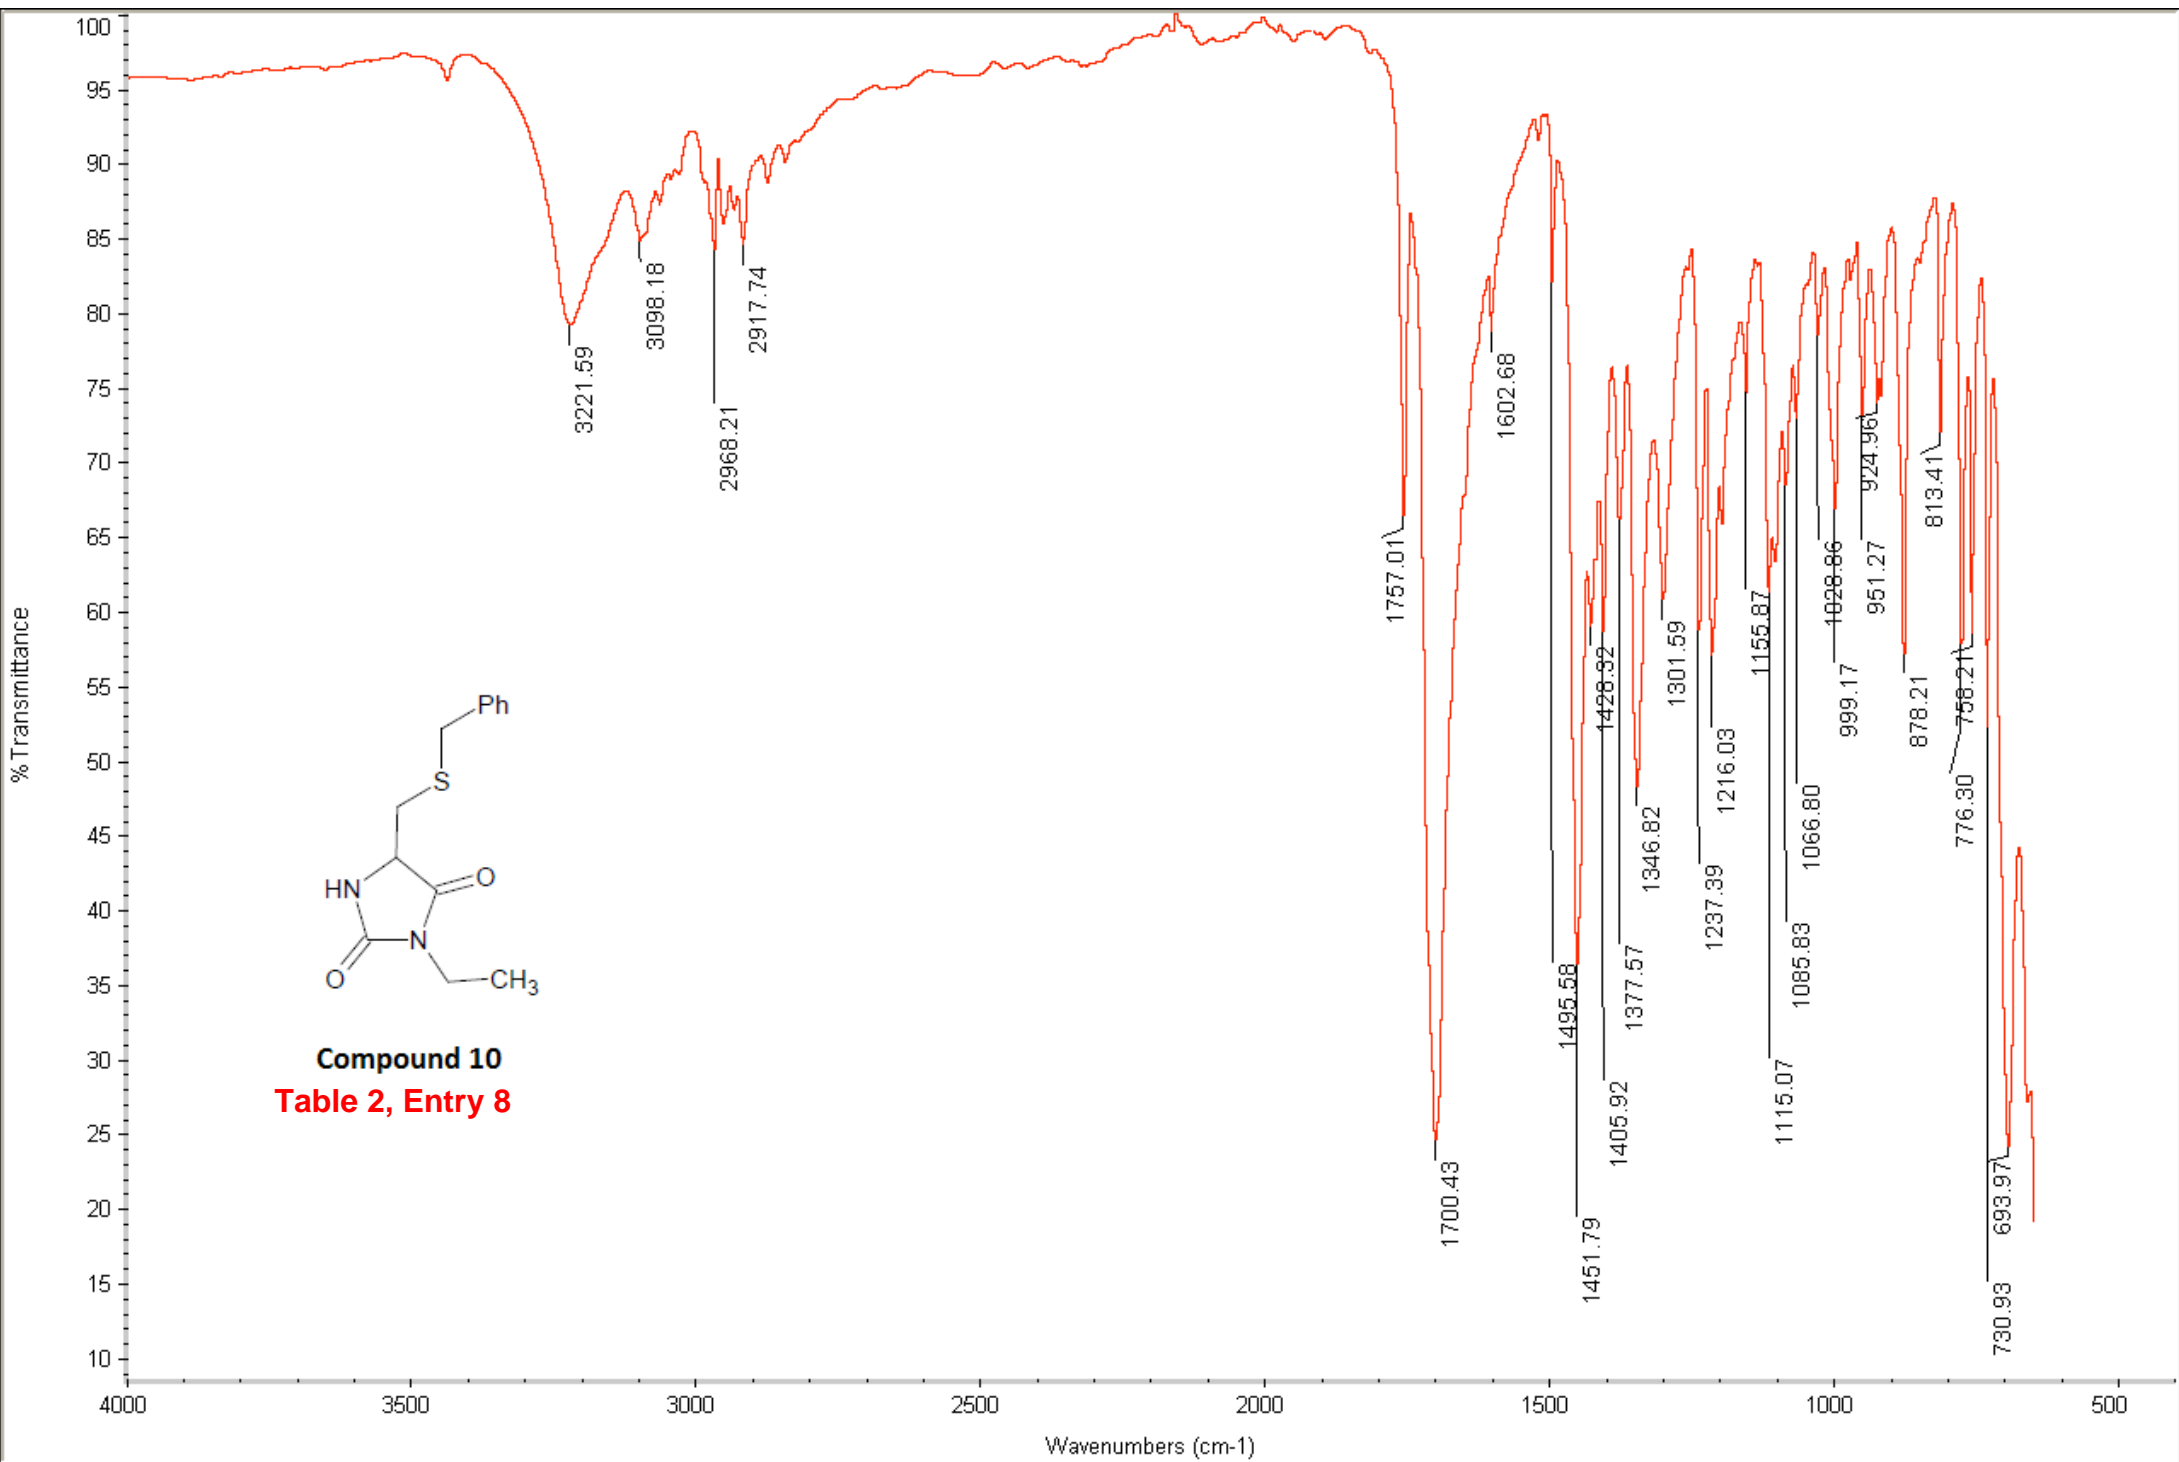

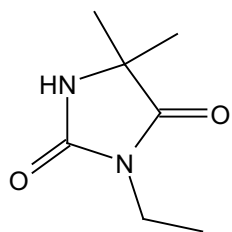

**Compound 11**  
**Table 2, entry 9**

—2468.20

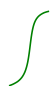

0.83

1016.92  
1009.79  
1002.56  
997.07

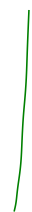

2.24

752.08  
750.43  
750.33

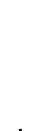

377.74  
324.77  
317.63  
310.50

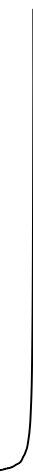

6.21

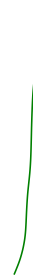

3.00

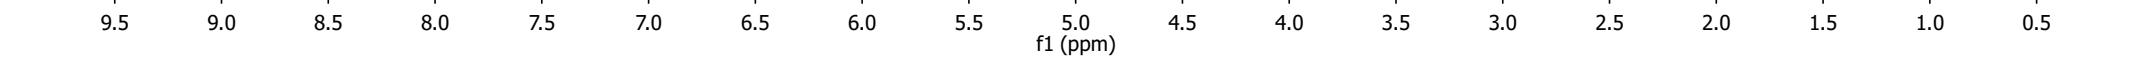

f1 (ppm)

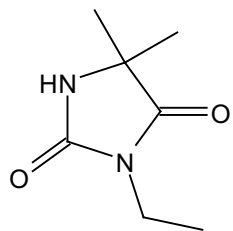

**Compound 11**  
**Table 2, entry 9**

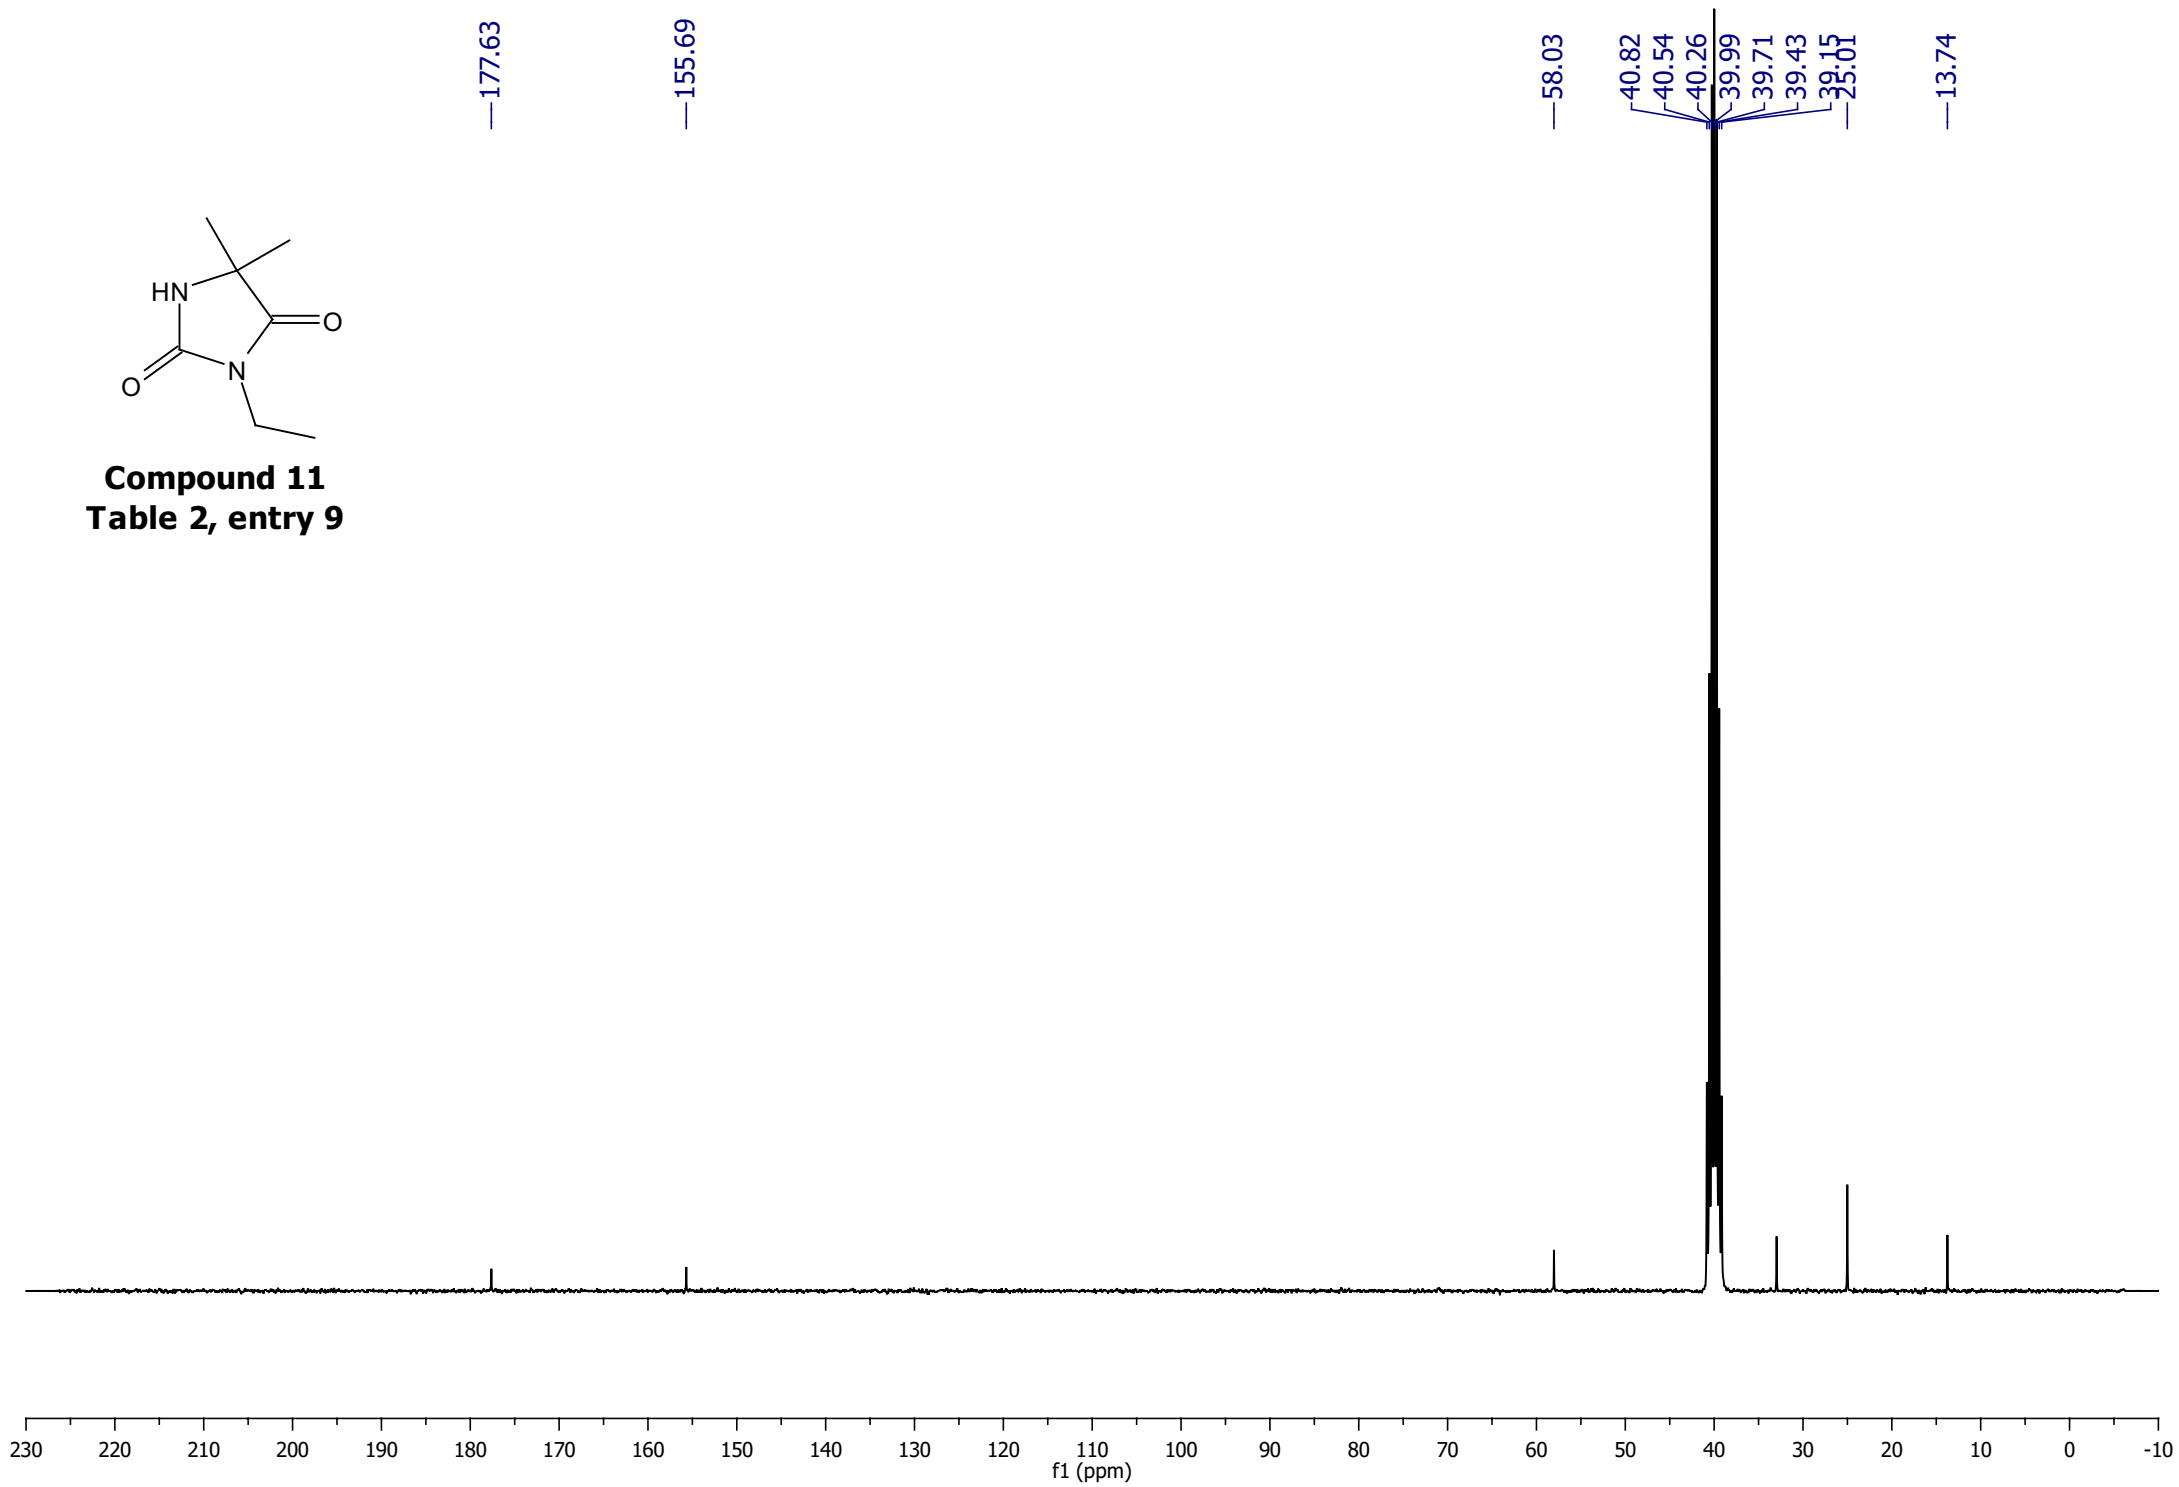

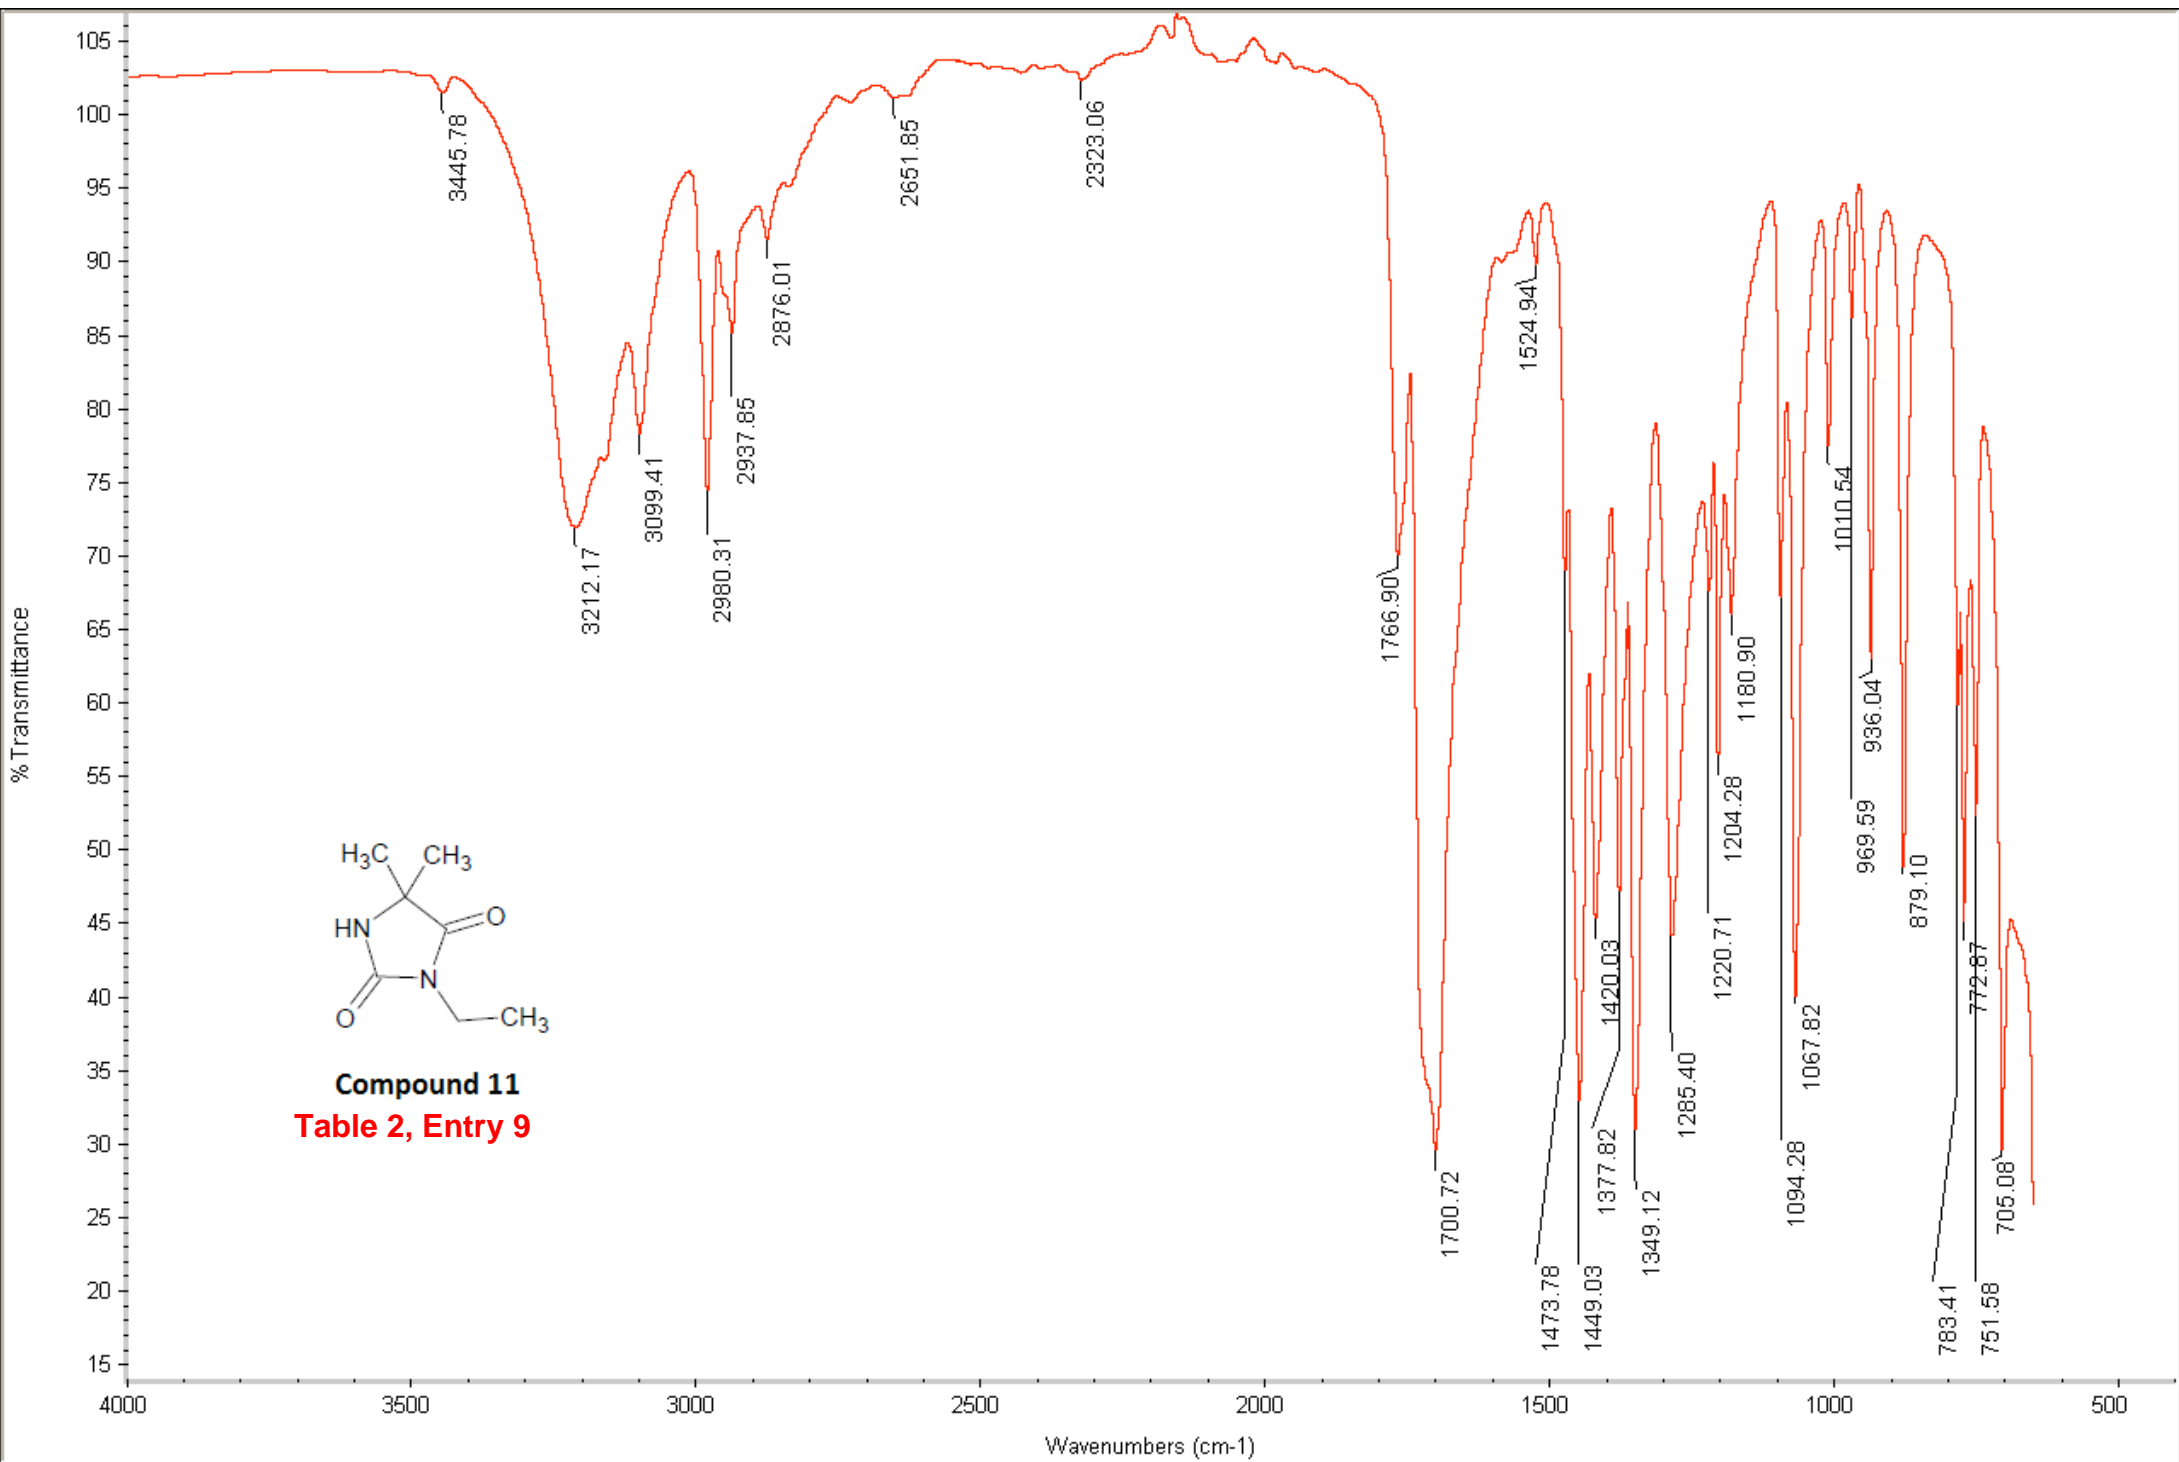



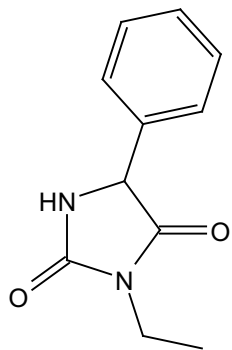

**Compound 12**  
**Table 2, entry 10**

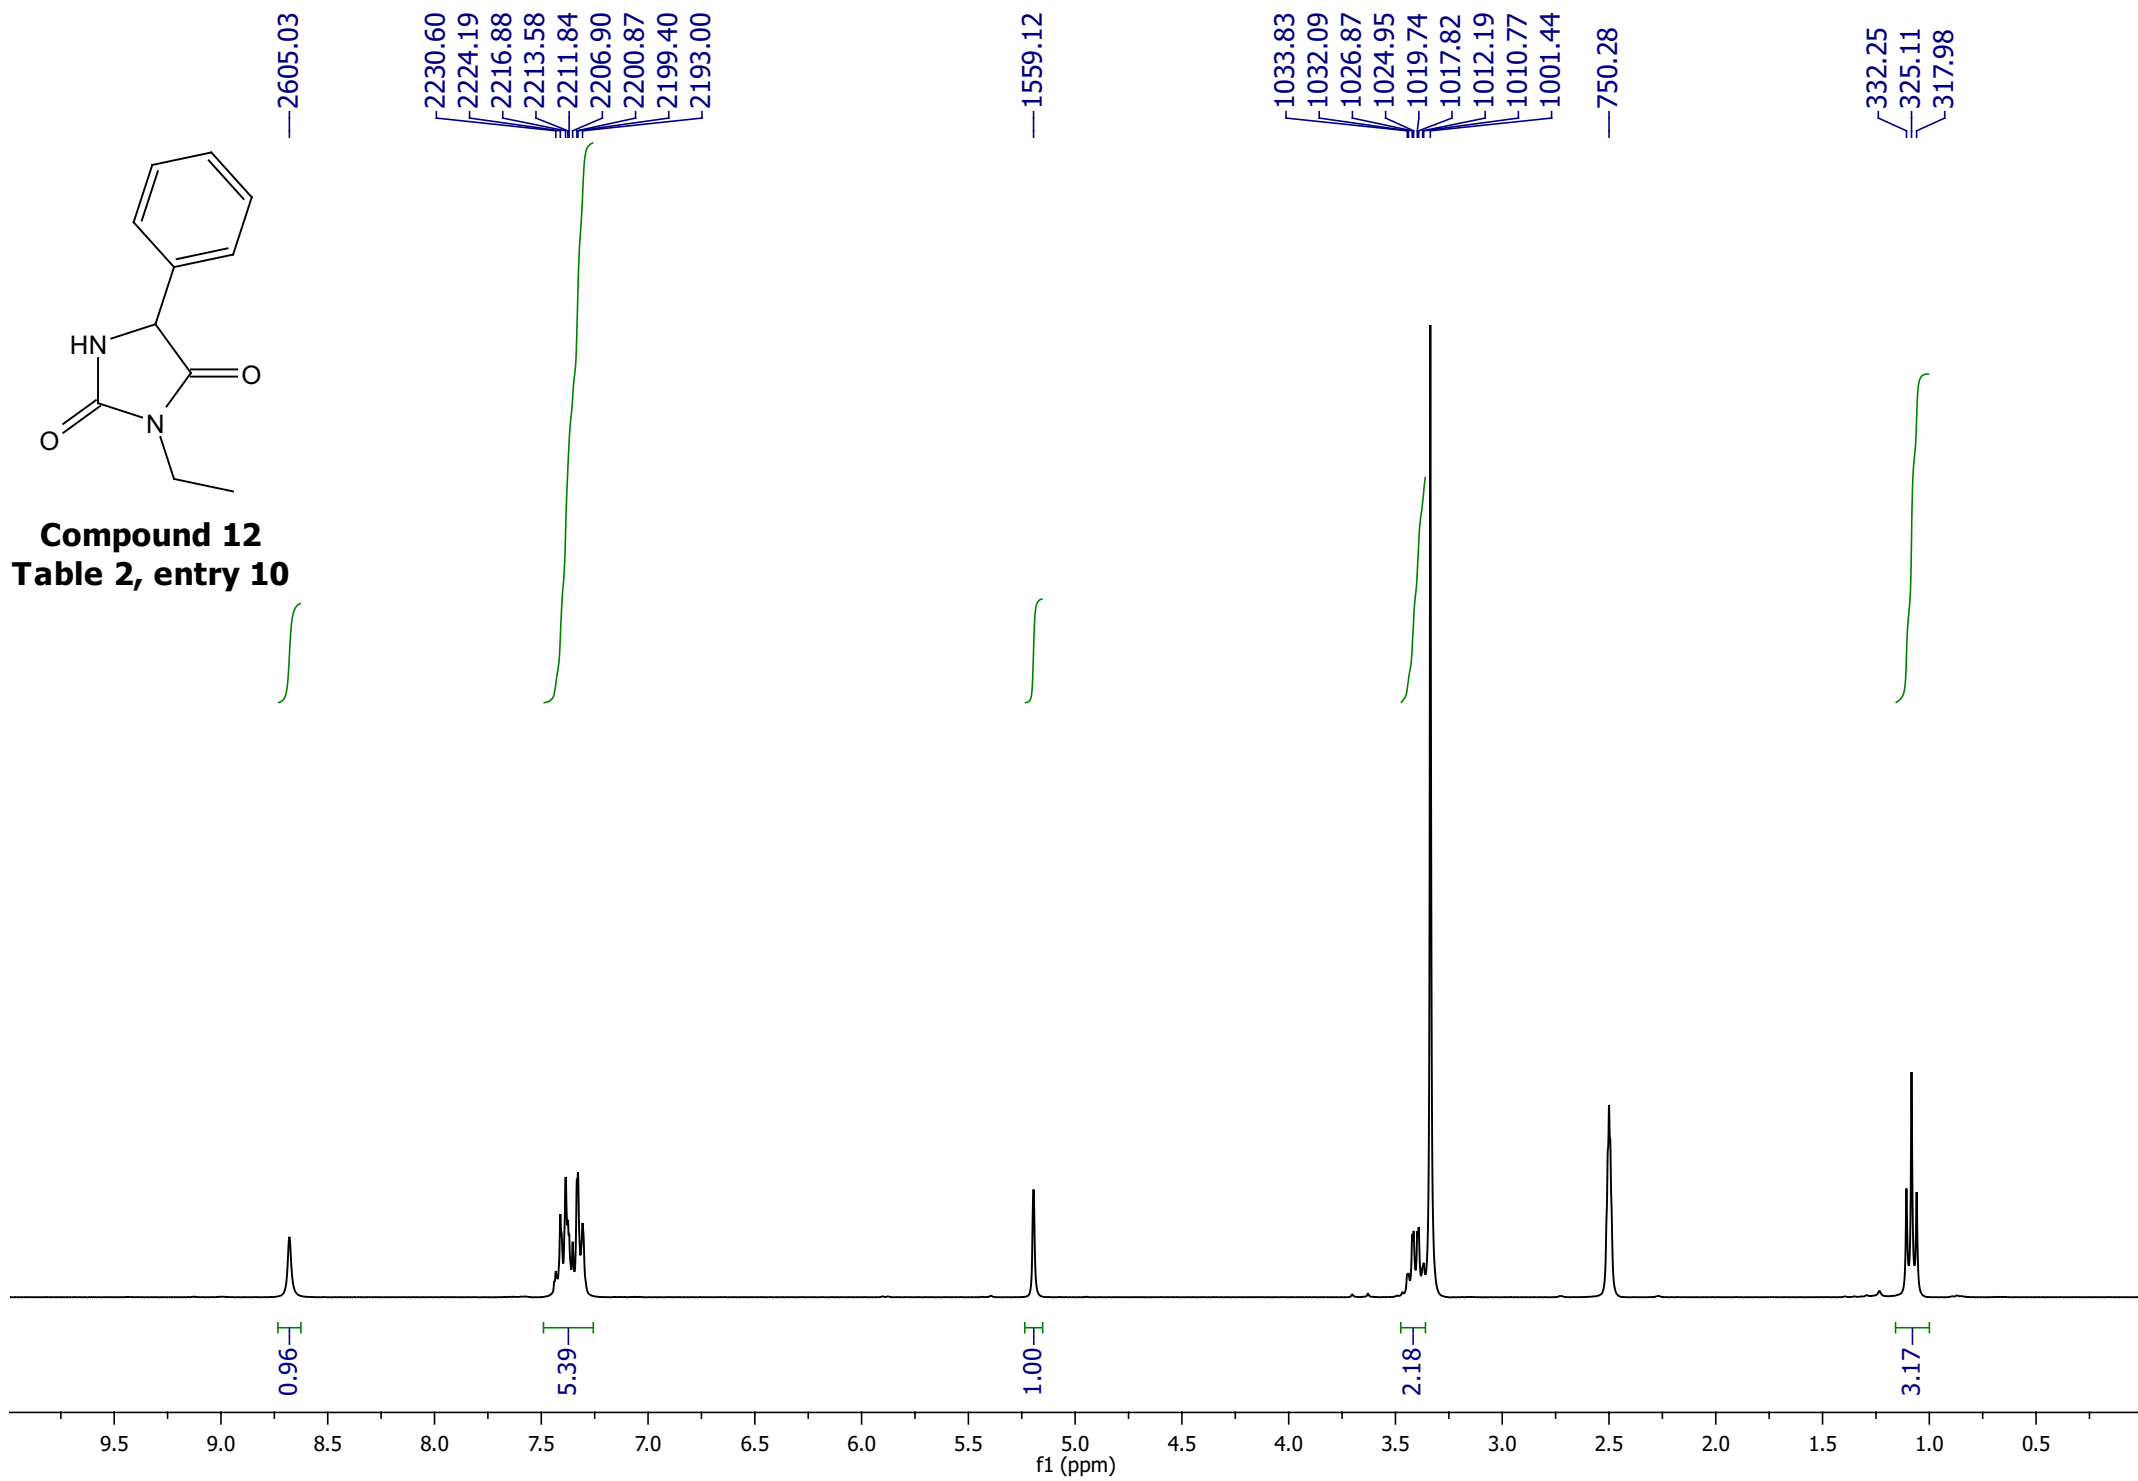

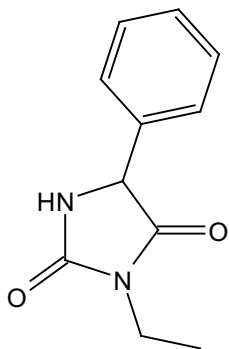

**Compound 12**  
**Table 2, entry 10**

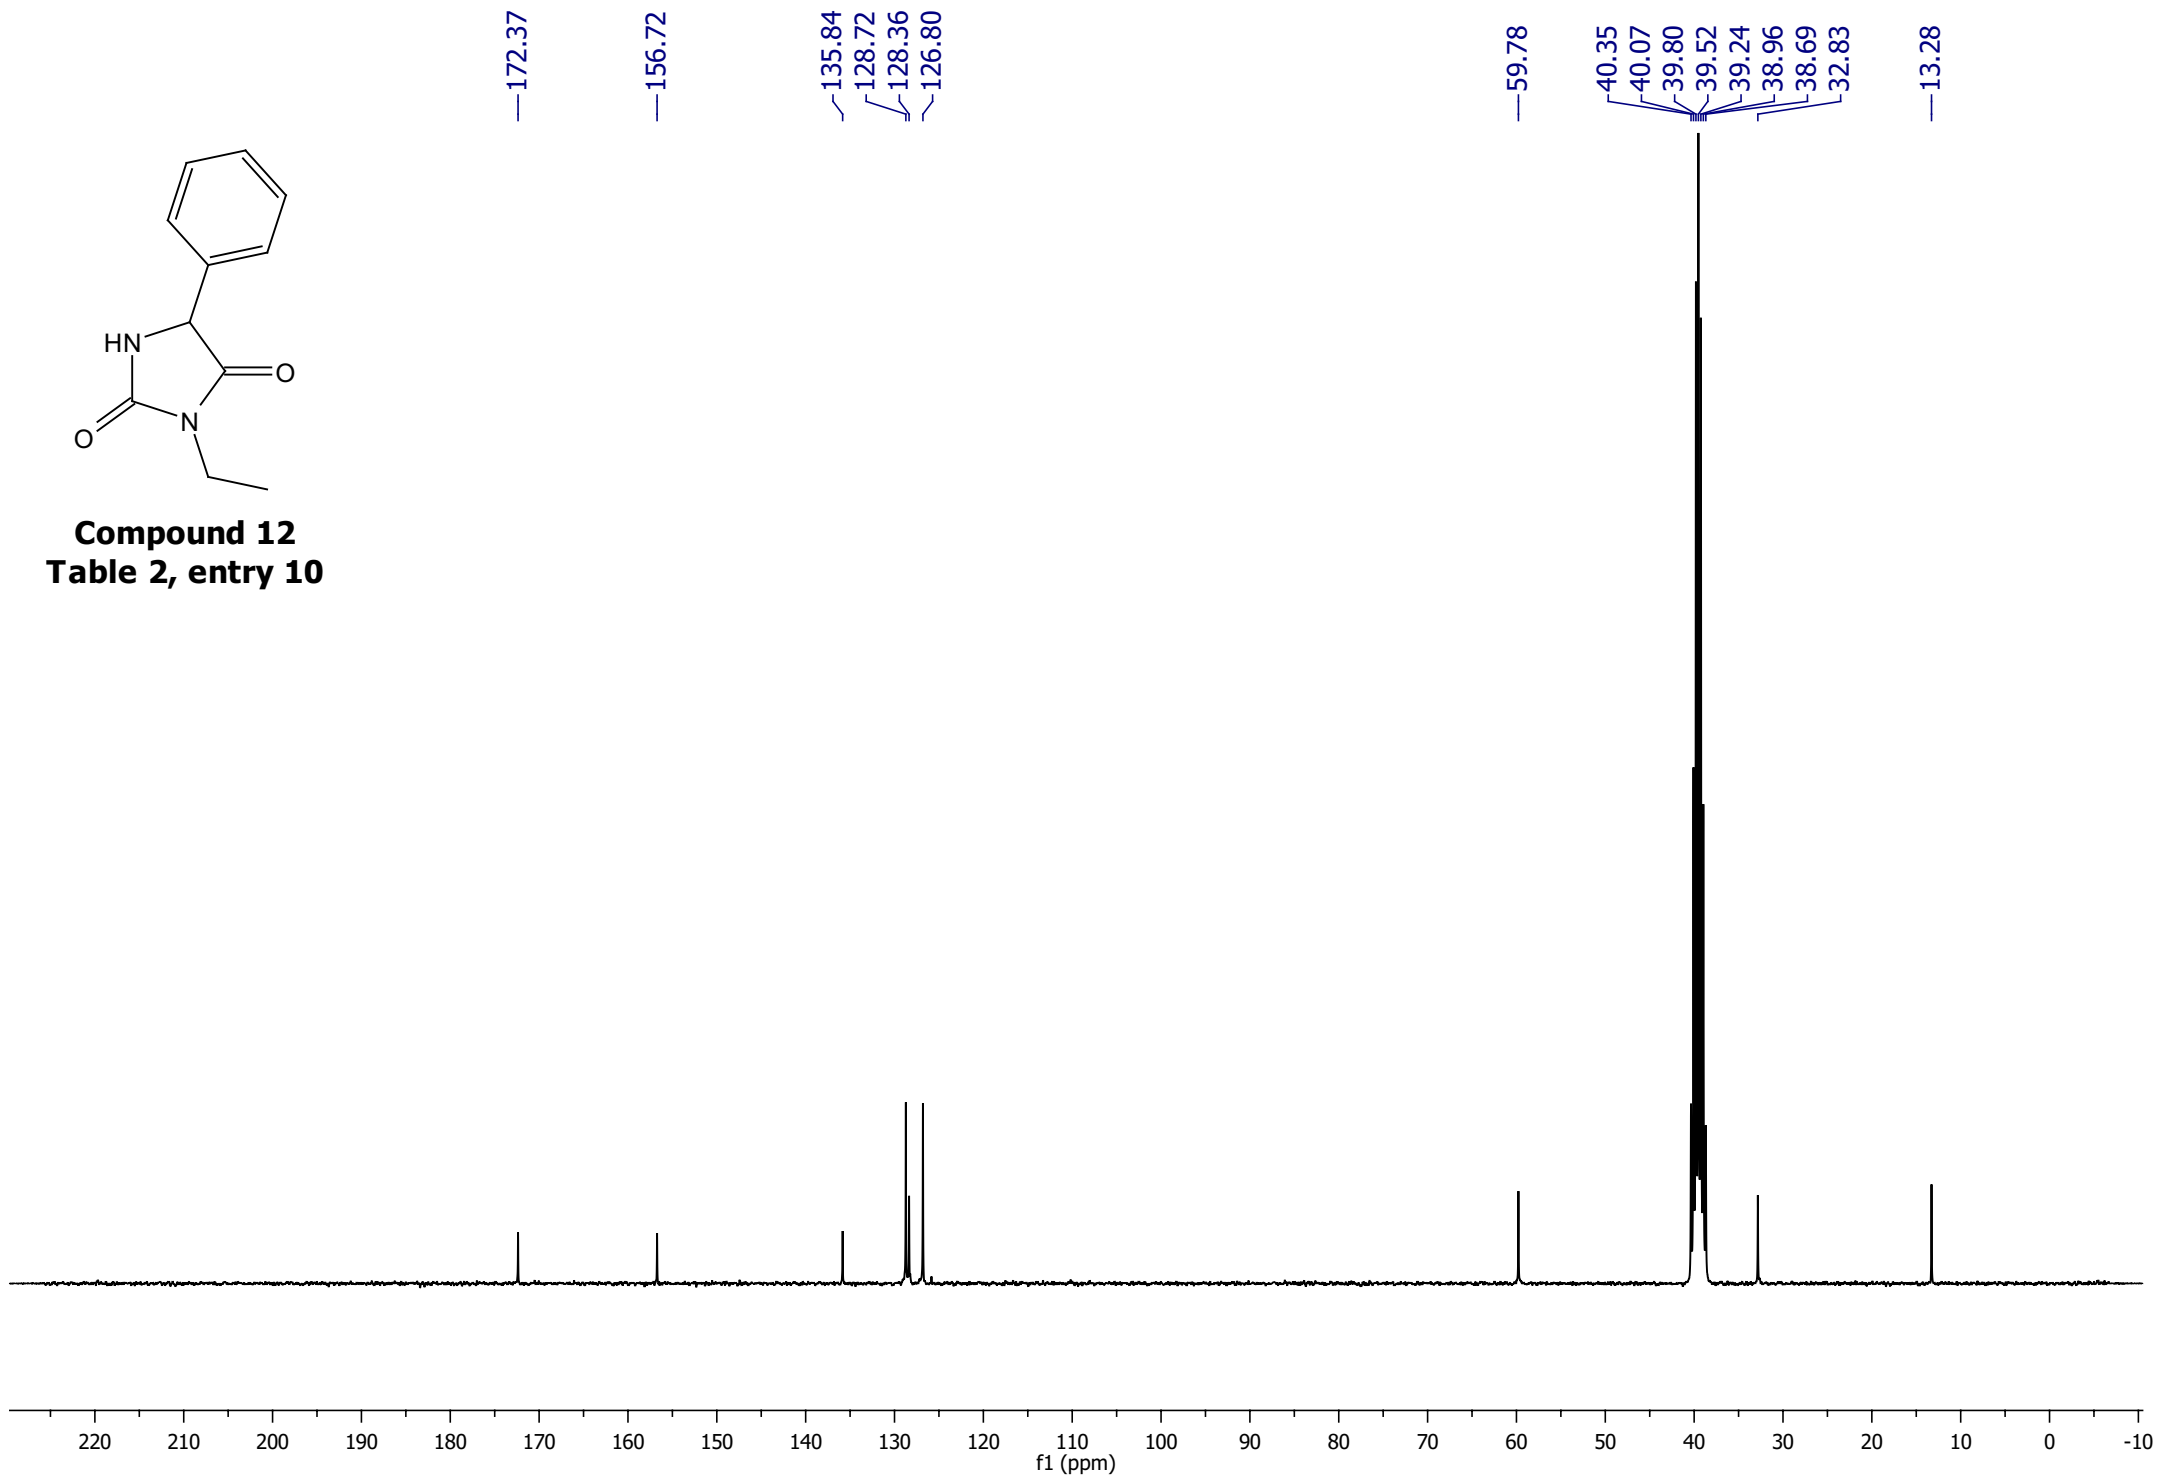

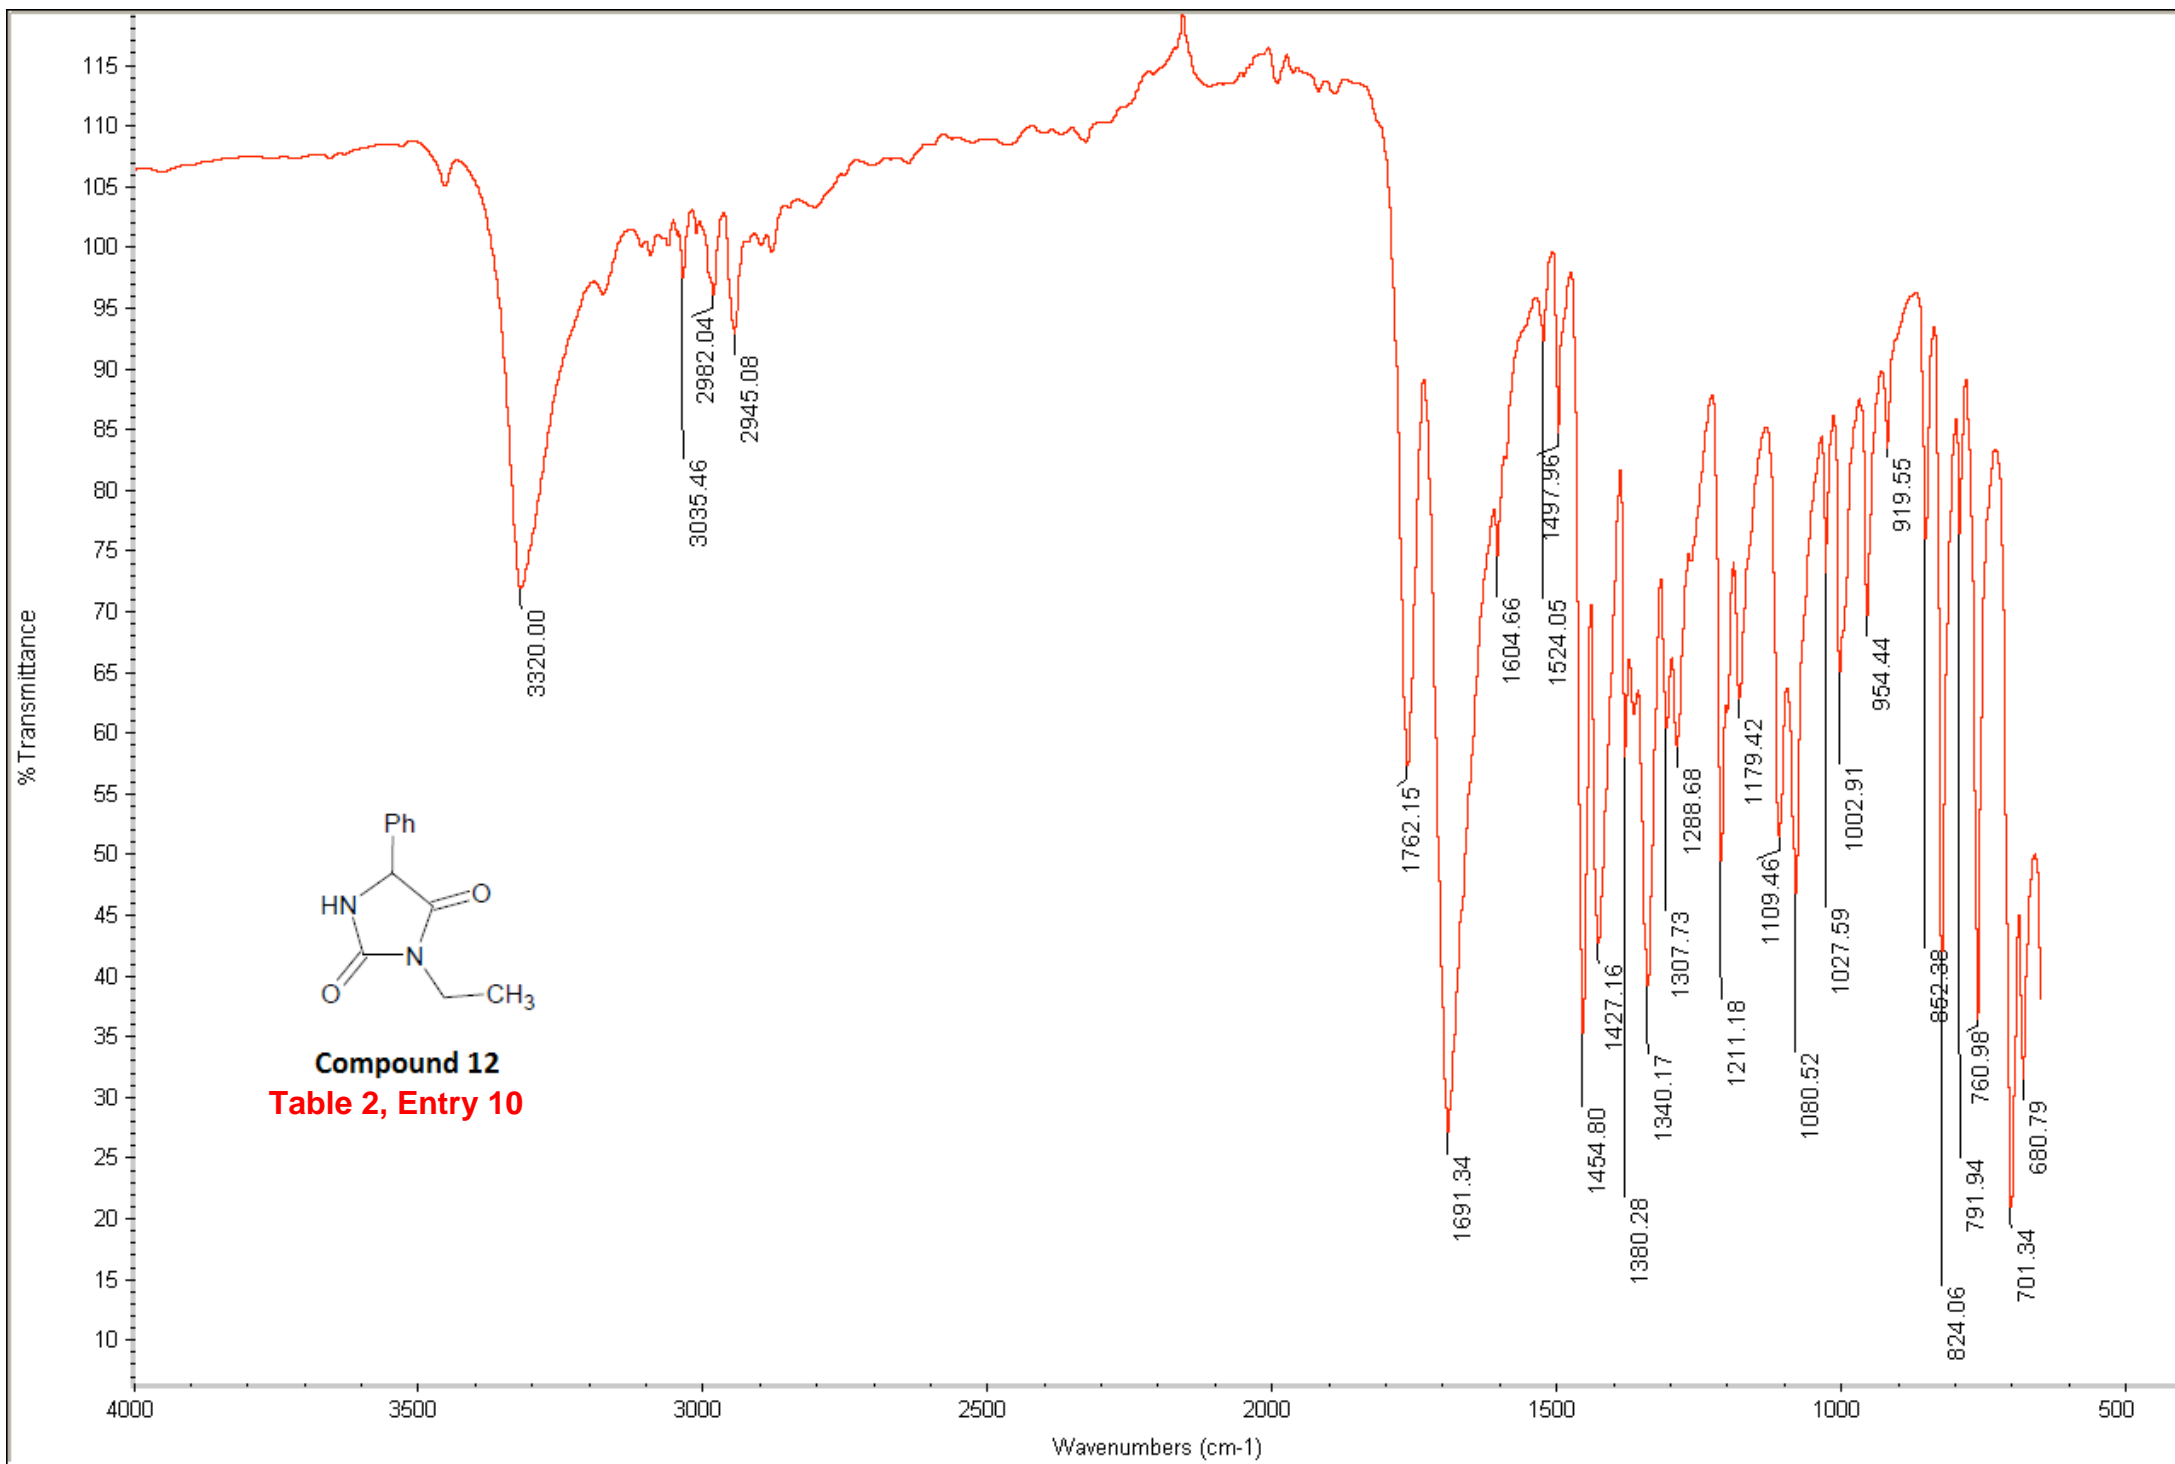

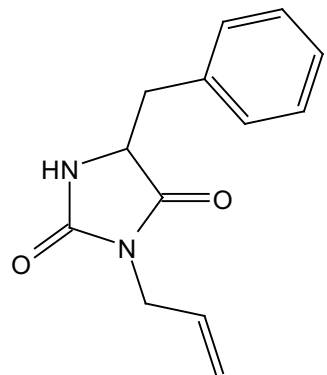

**Compound 13**  
**Table 2, entry 11**

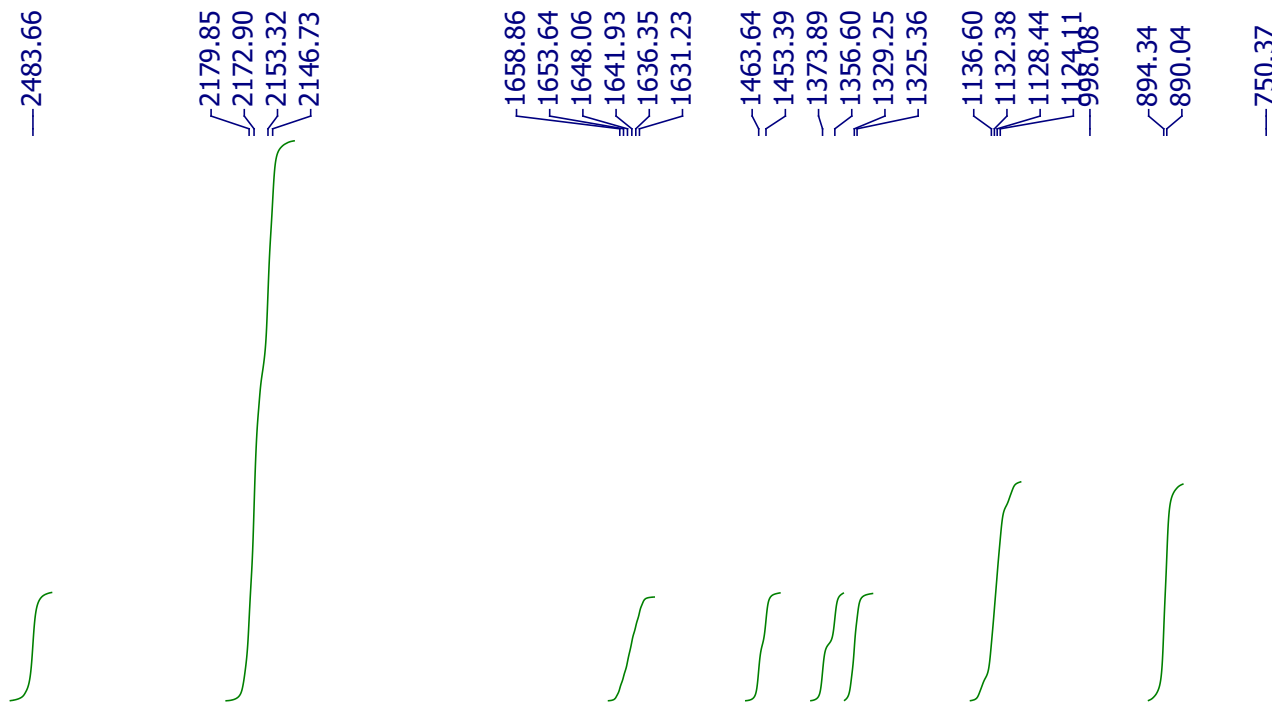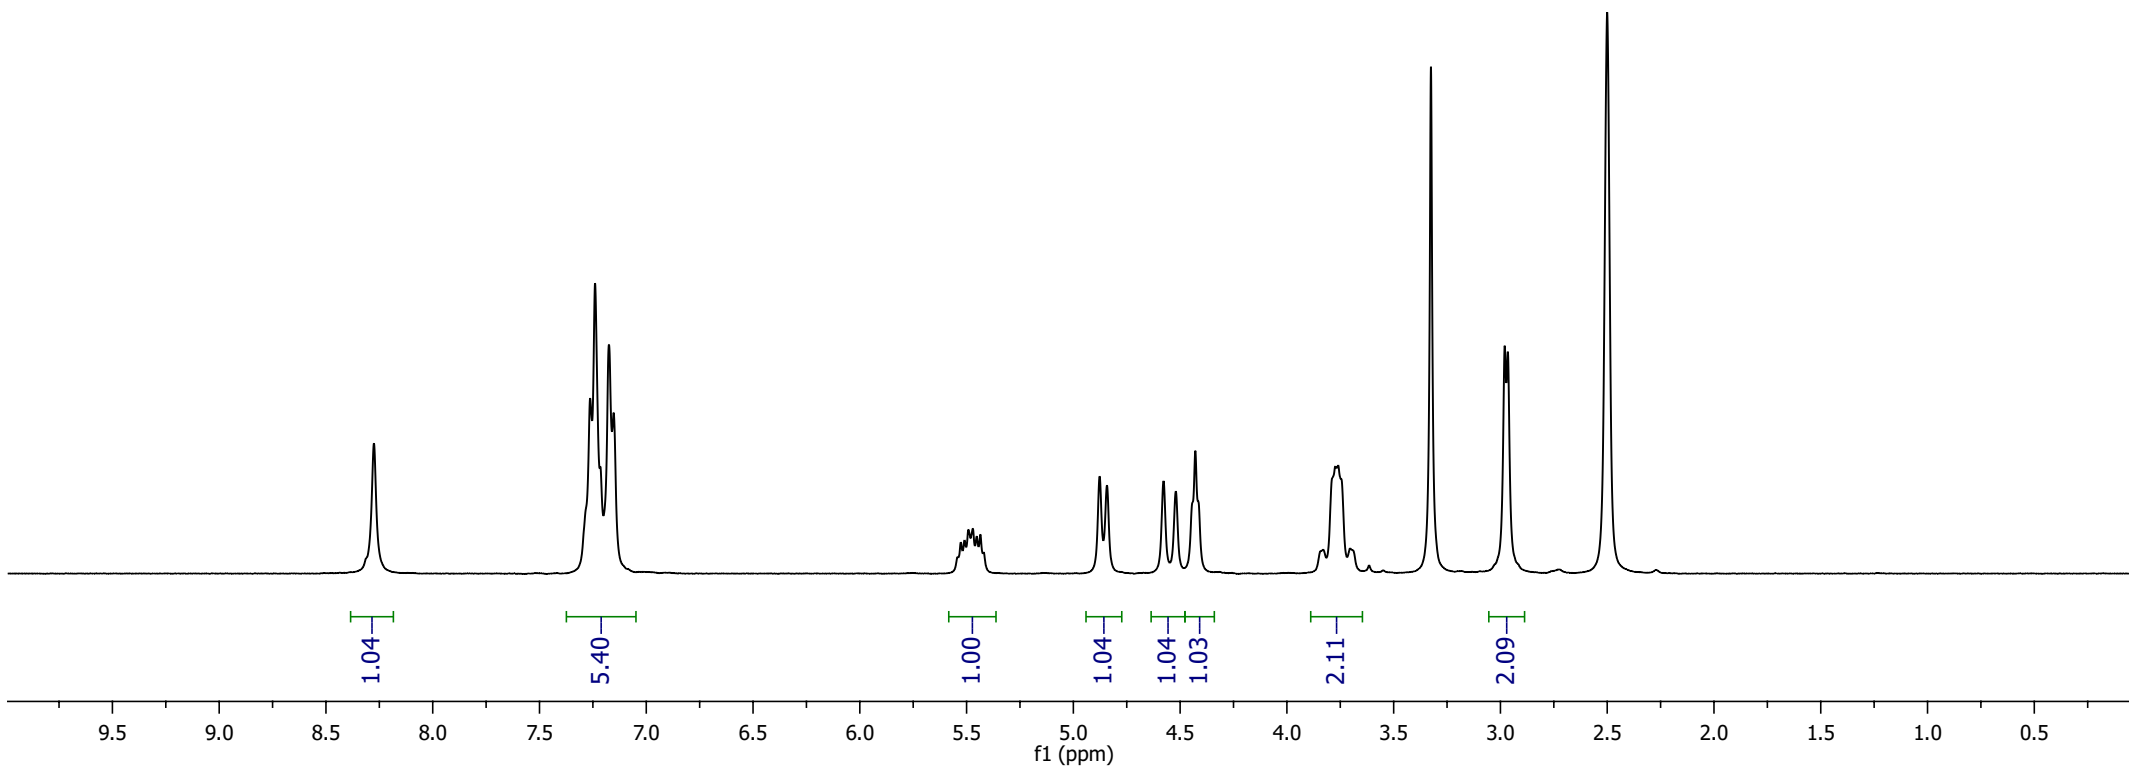

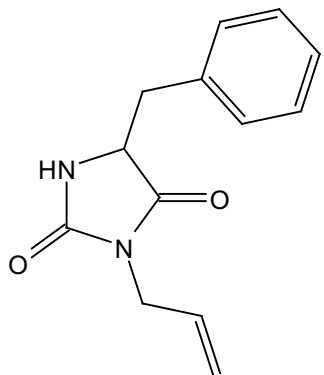

**Compound 13**  
**Table 2, entry 11**

—173.04

—156.09

—135.17

—131.80

—129.82

—128.06

—126.73

—115.56

—57.12

—40.35

—40.08

—39.80

—39.52

—39.35

—39.24

—38.97

—38.69

—36.29

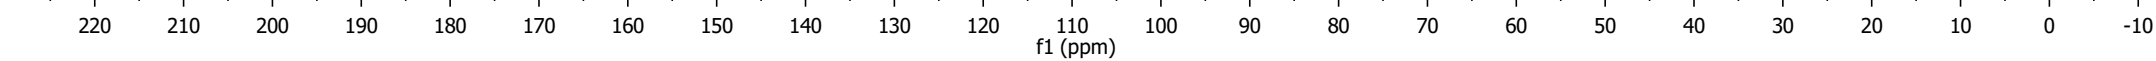

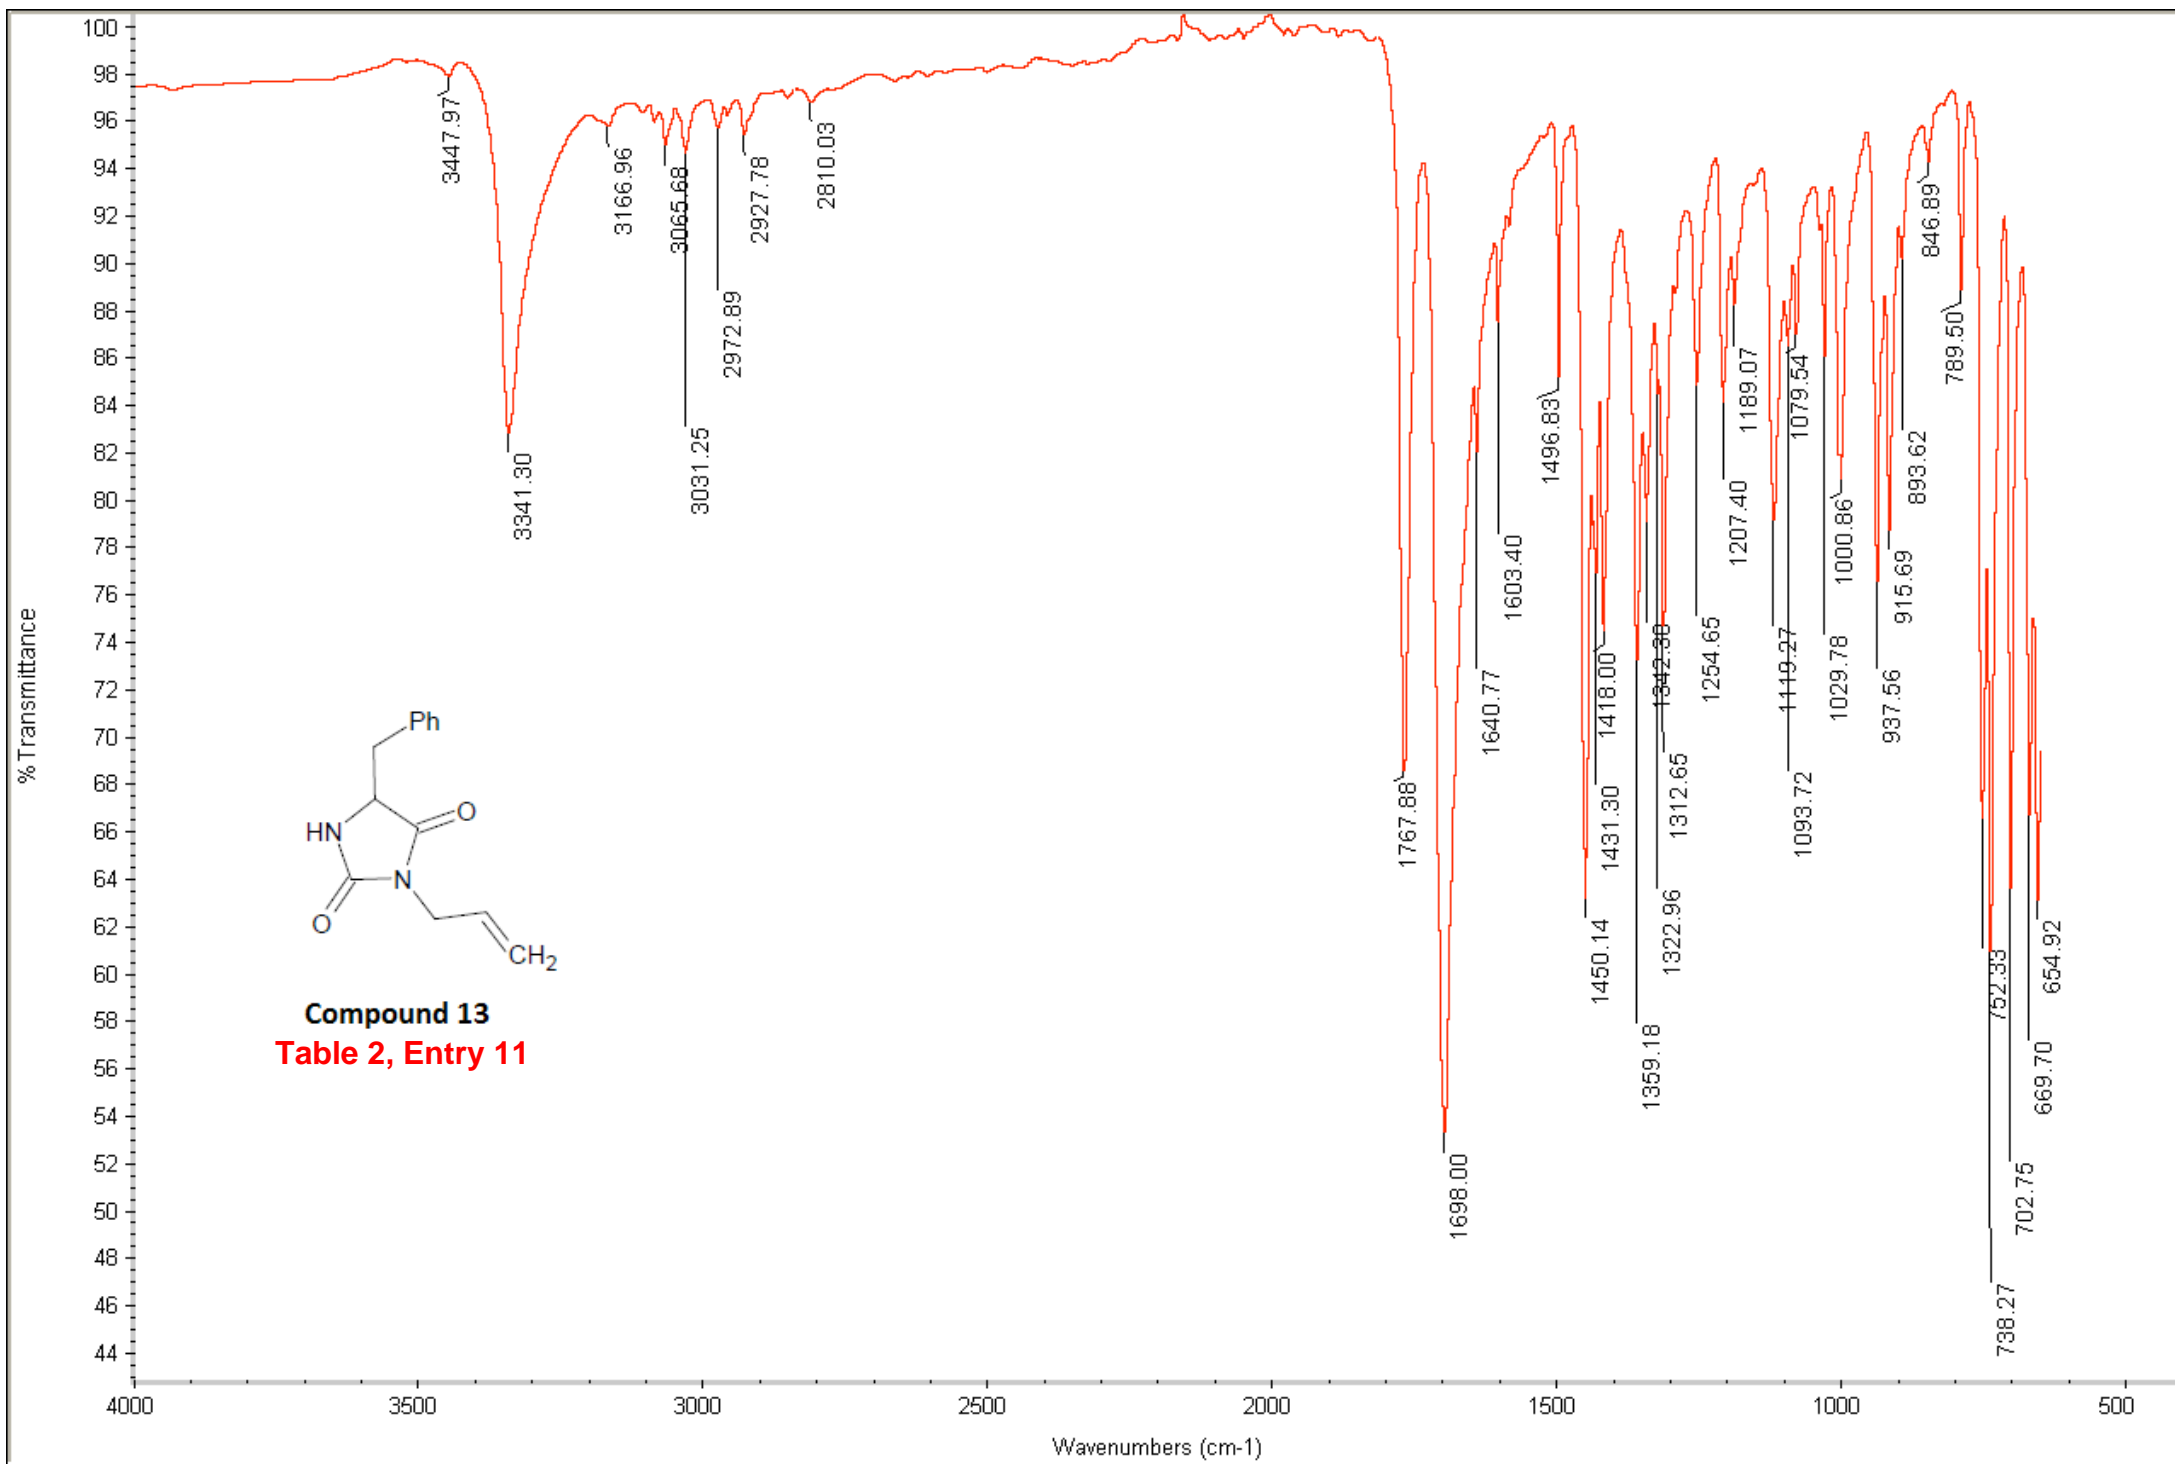

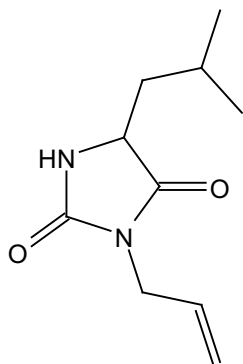

**Compound 14**  
**Table 2, entry 12**

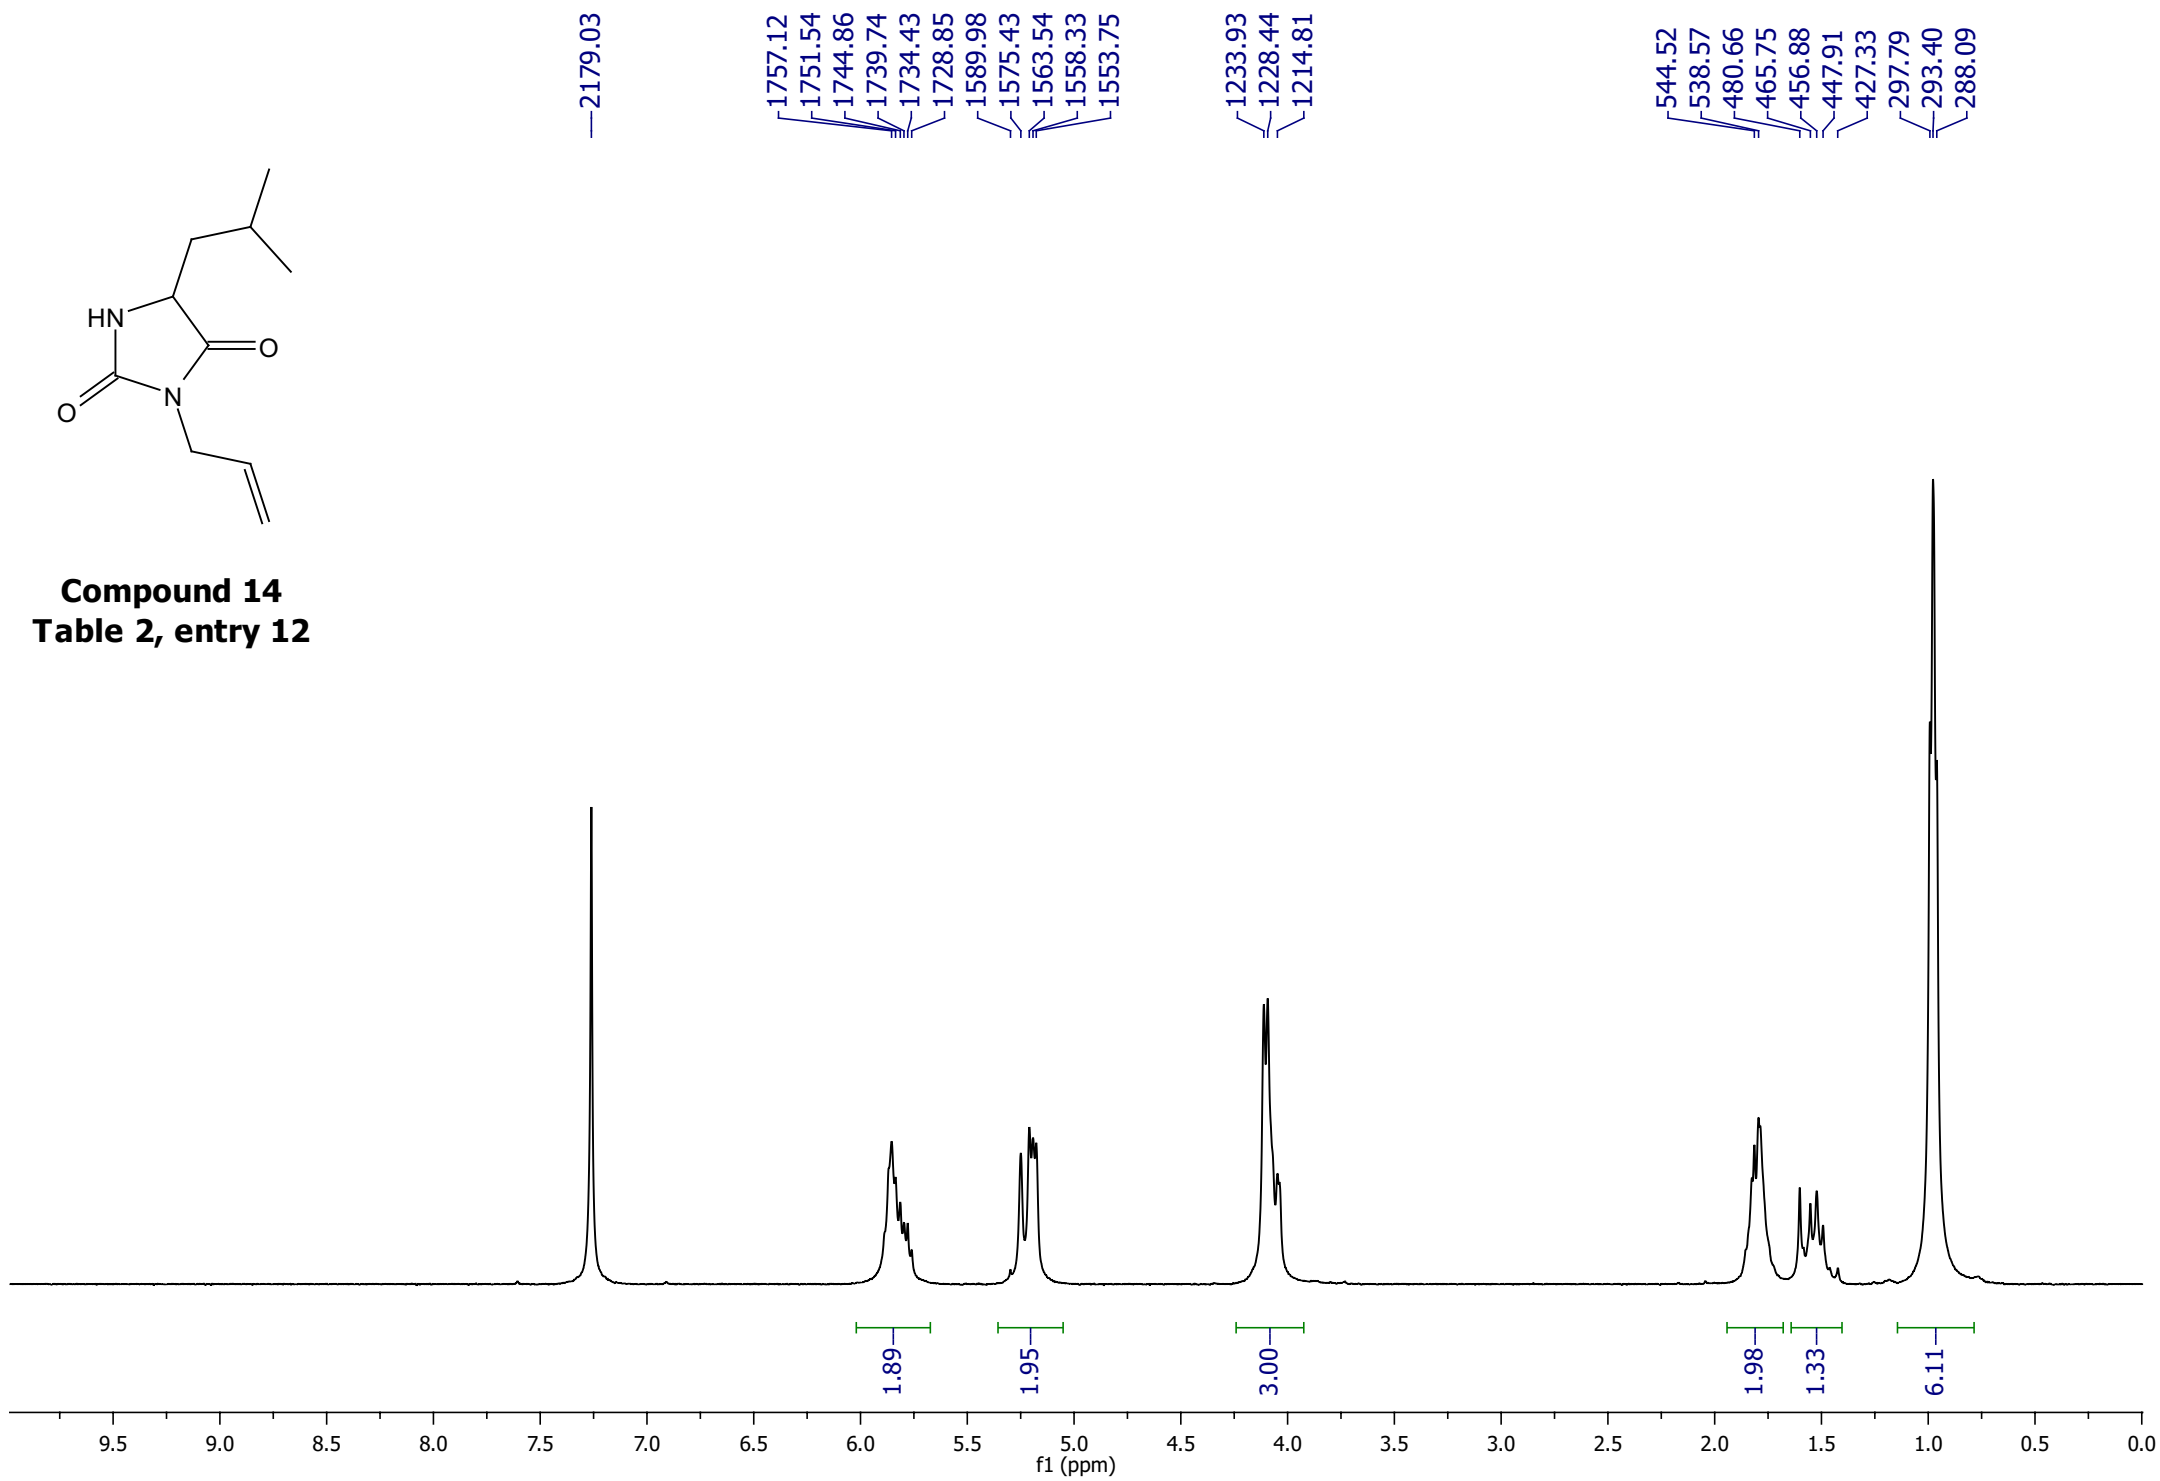



**Compound 14**  
**Table 2, entry 12**

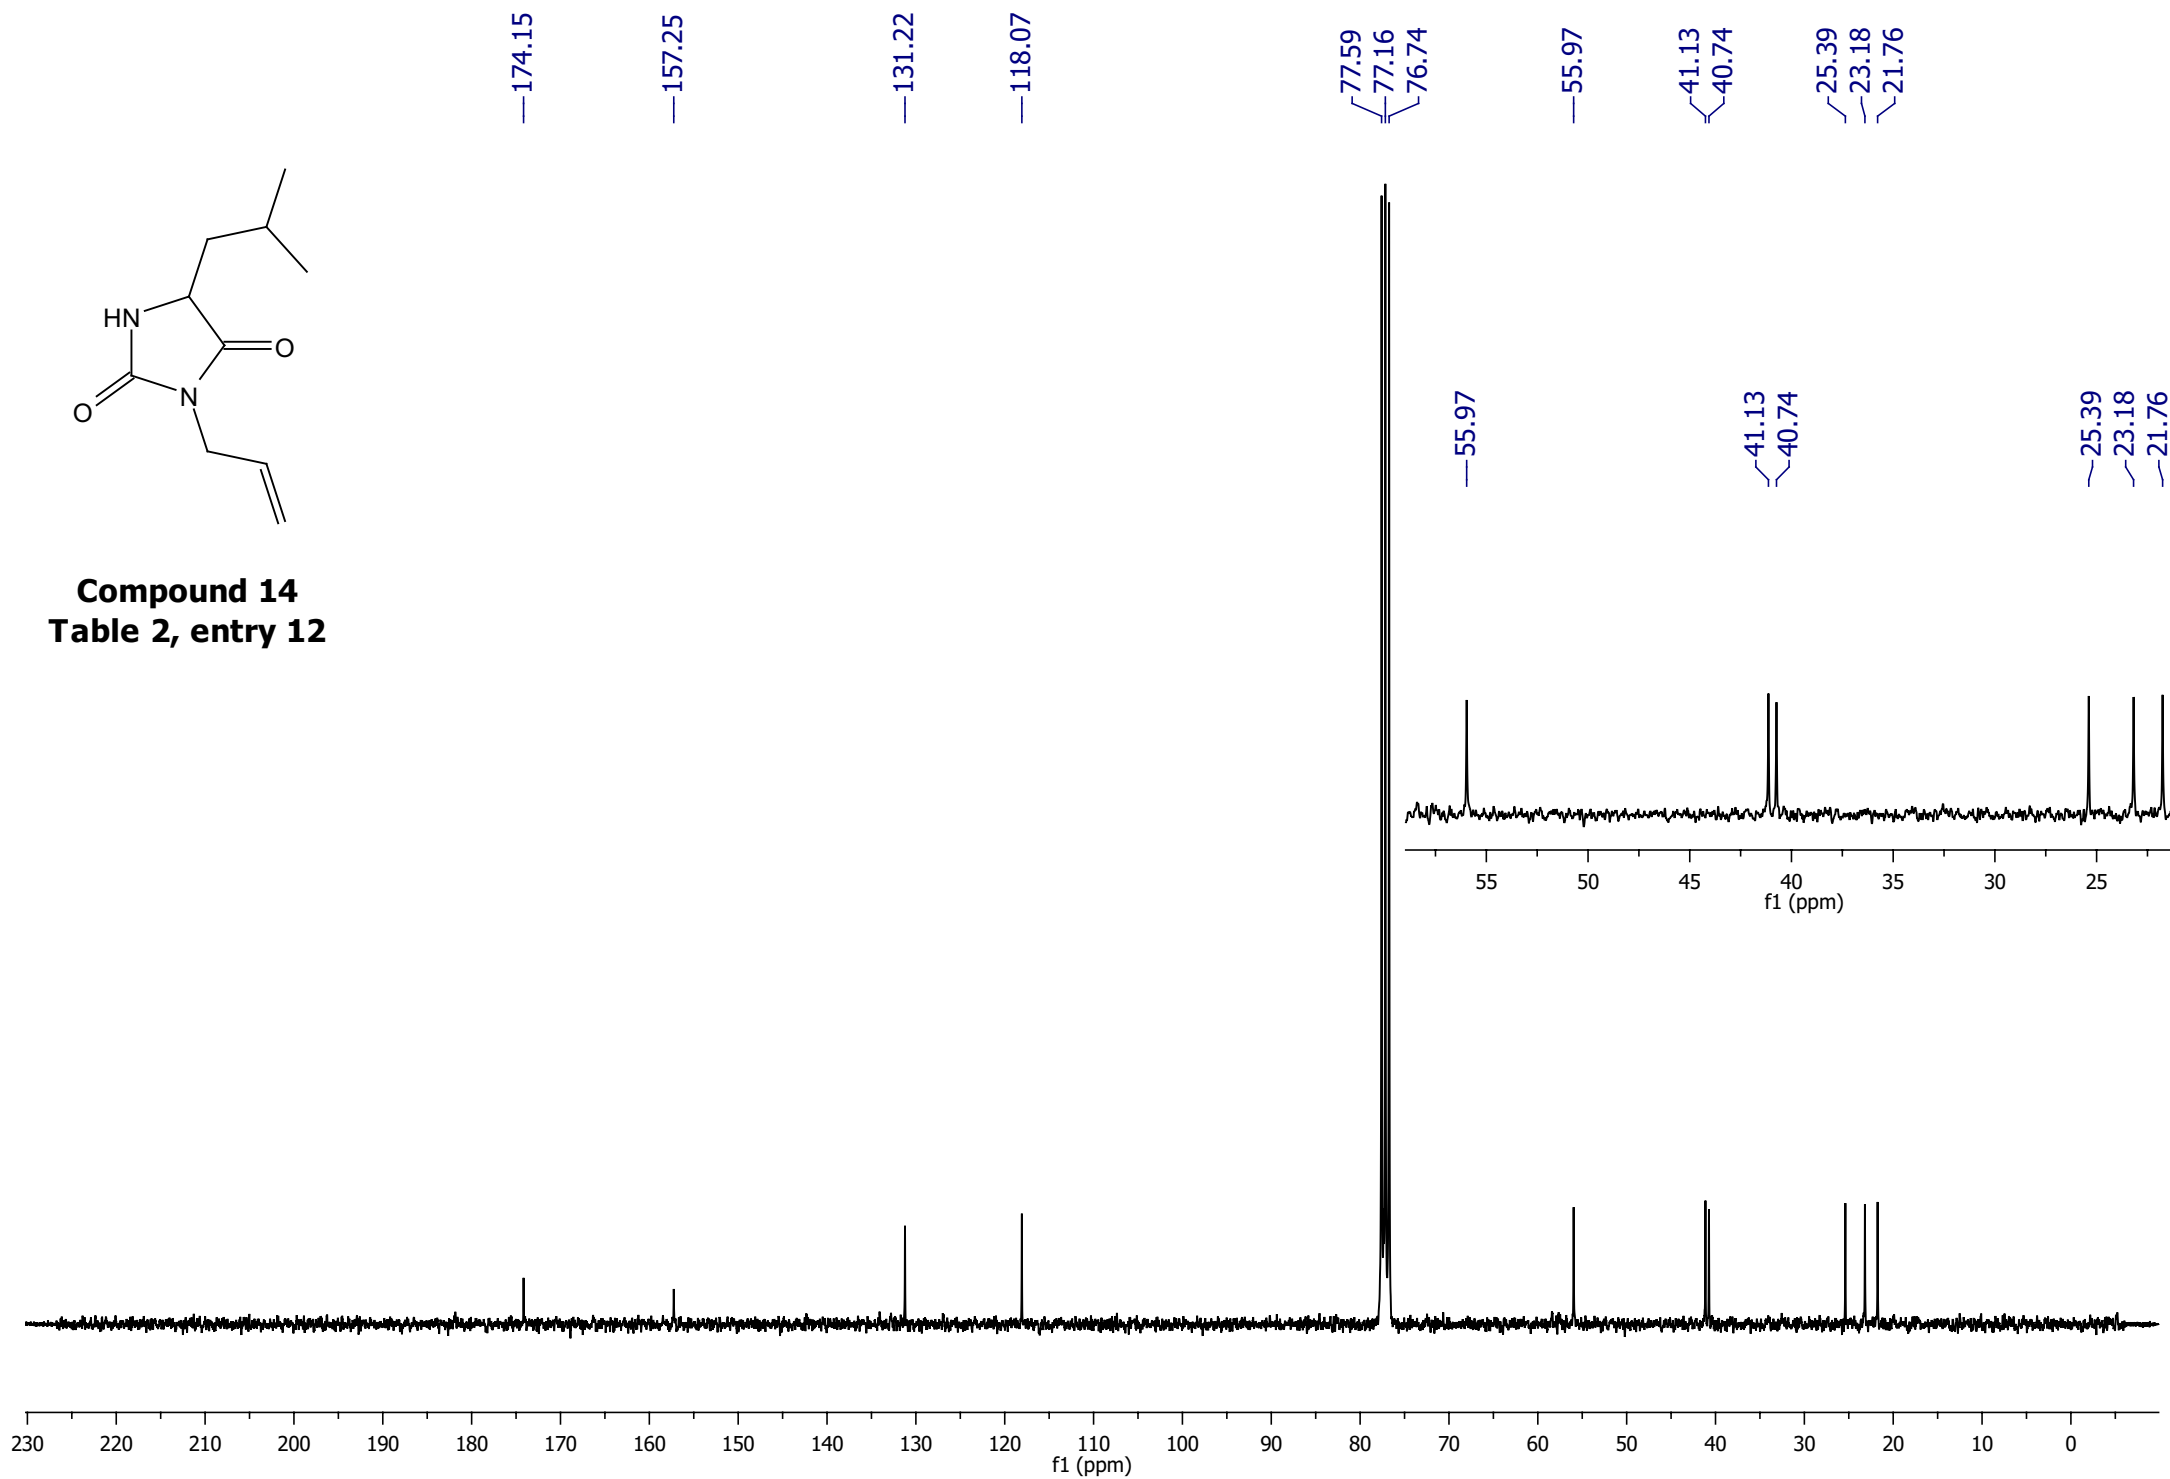



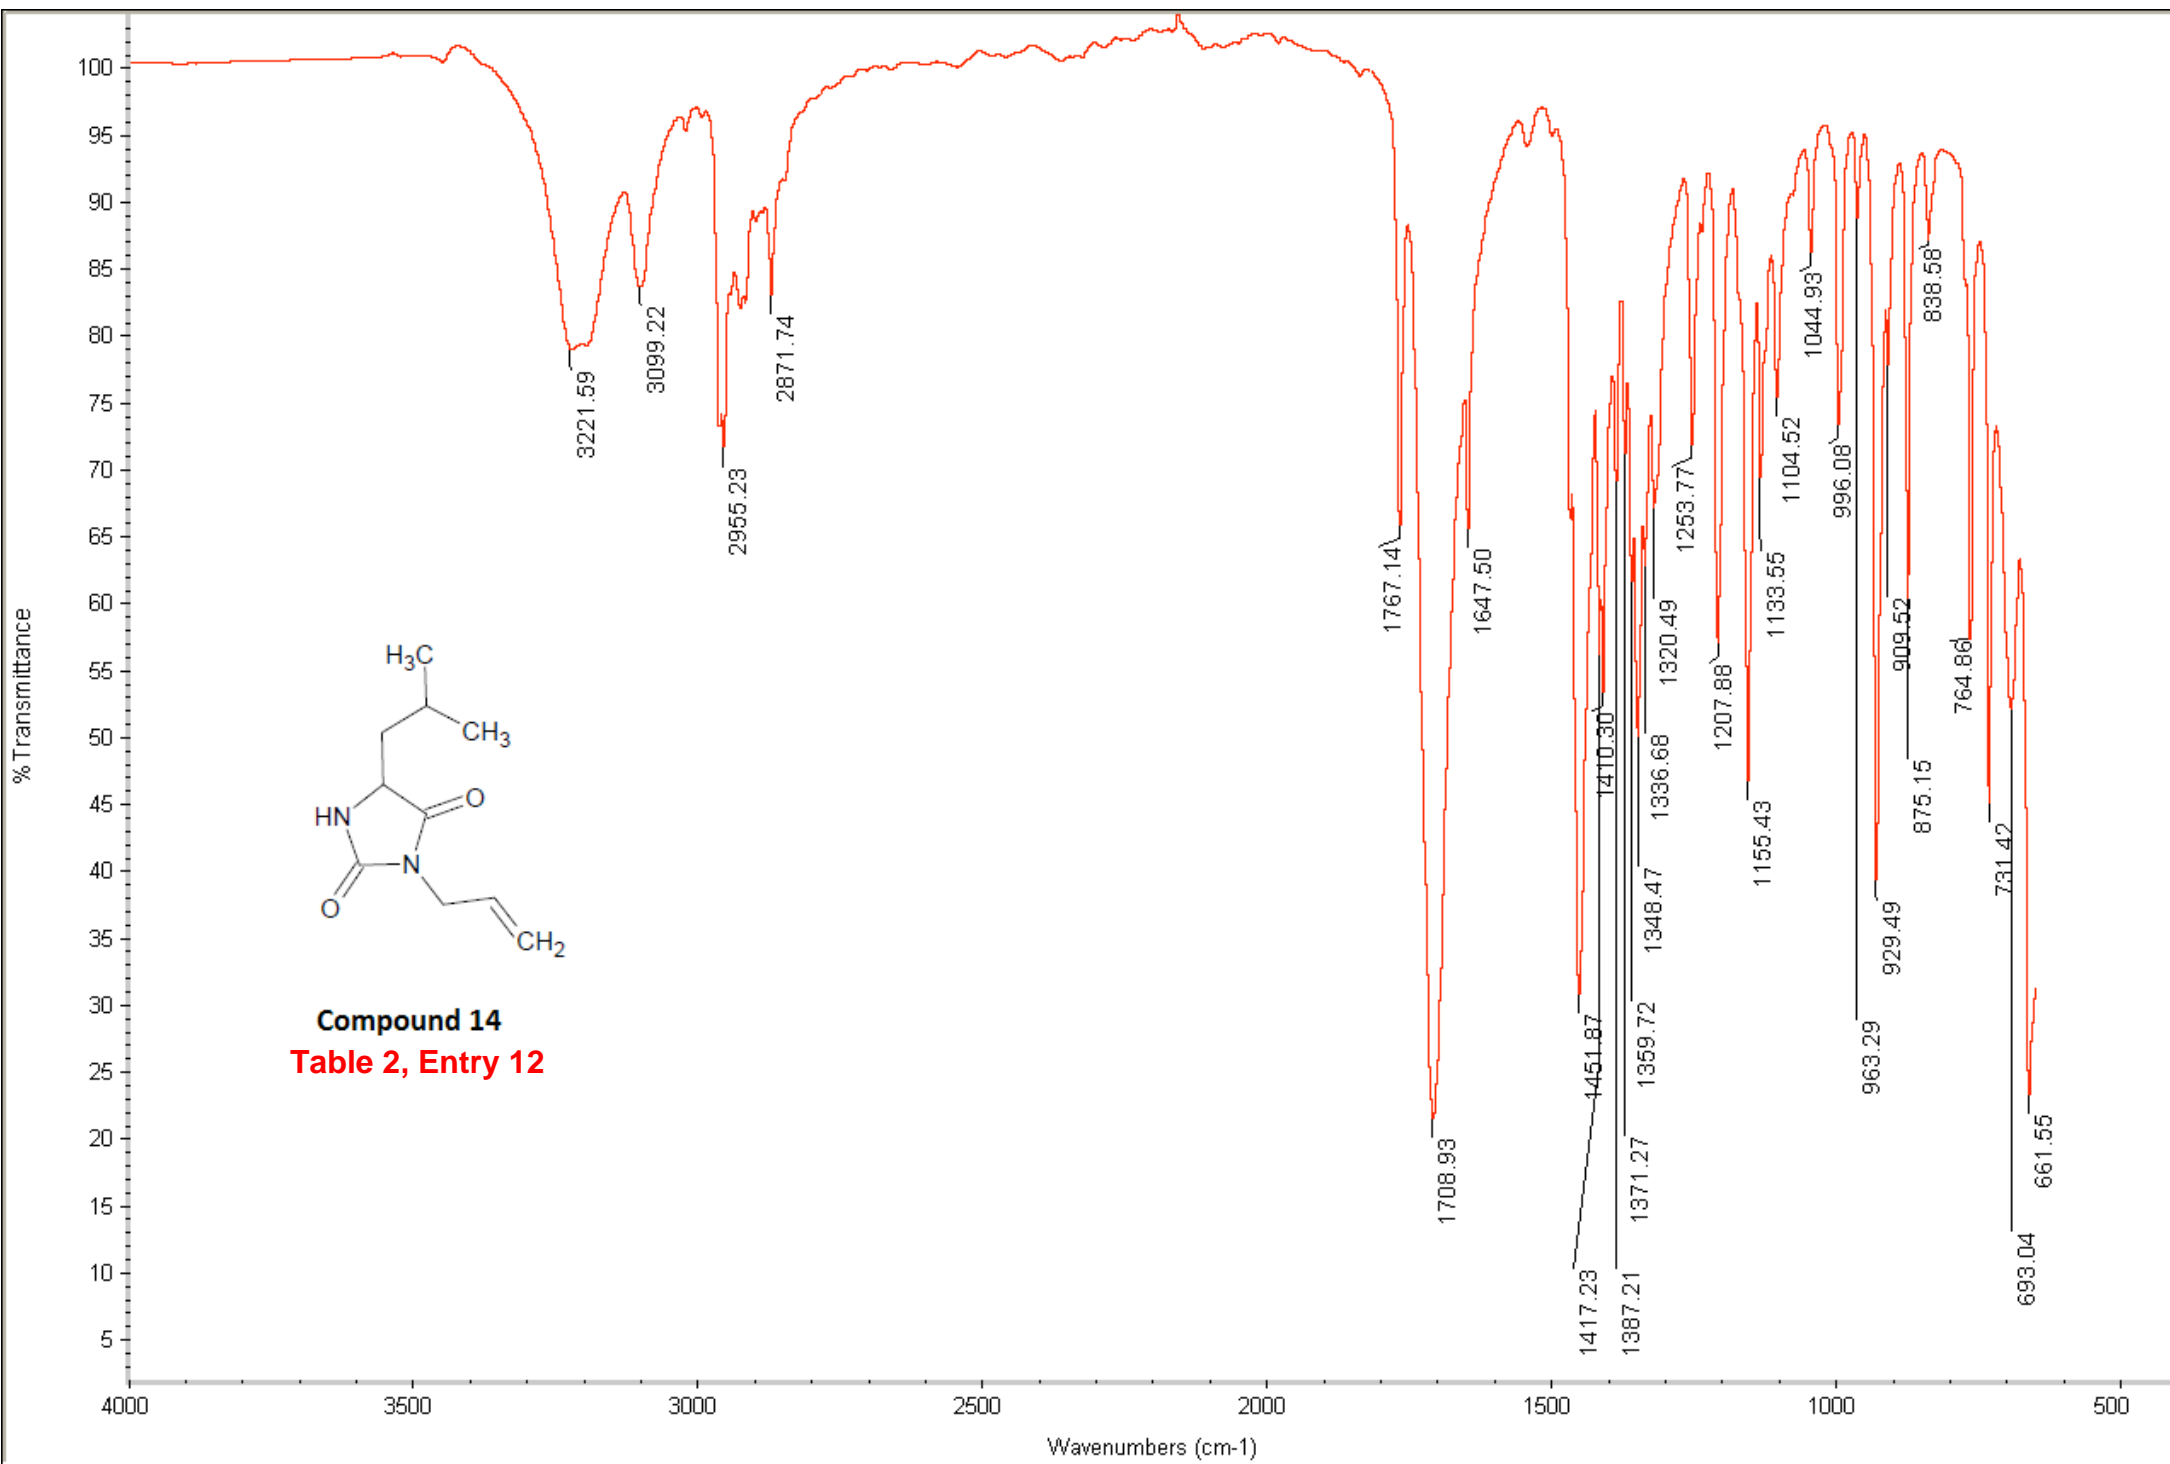

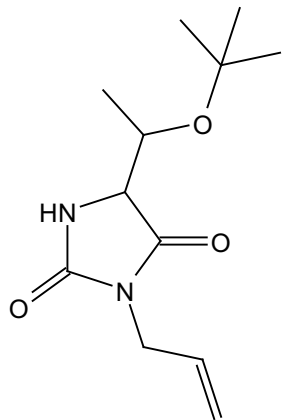

**Compound 15**  
**Table 2, entry 13**

2471.87  
2439.58

1740.29  
1735.35  
1730.23  
1724.83  
1718.15  
1713.12  
1707.81  
1702.96  
1542.50  
1533.63  
1525.40  
1515.33

1208.78  
1191.49  
1171.91

1000.75

750.75

357.53  
351.31  
343.81  
333.38  
316.00

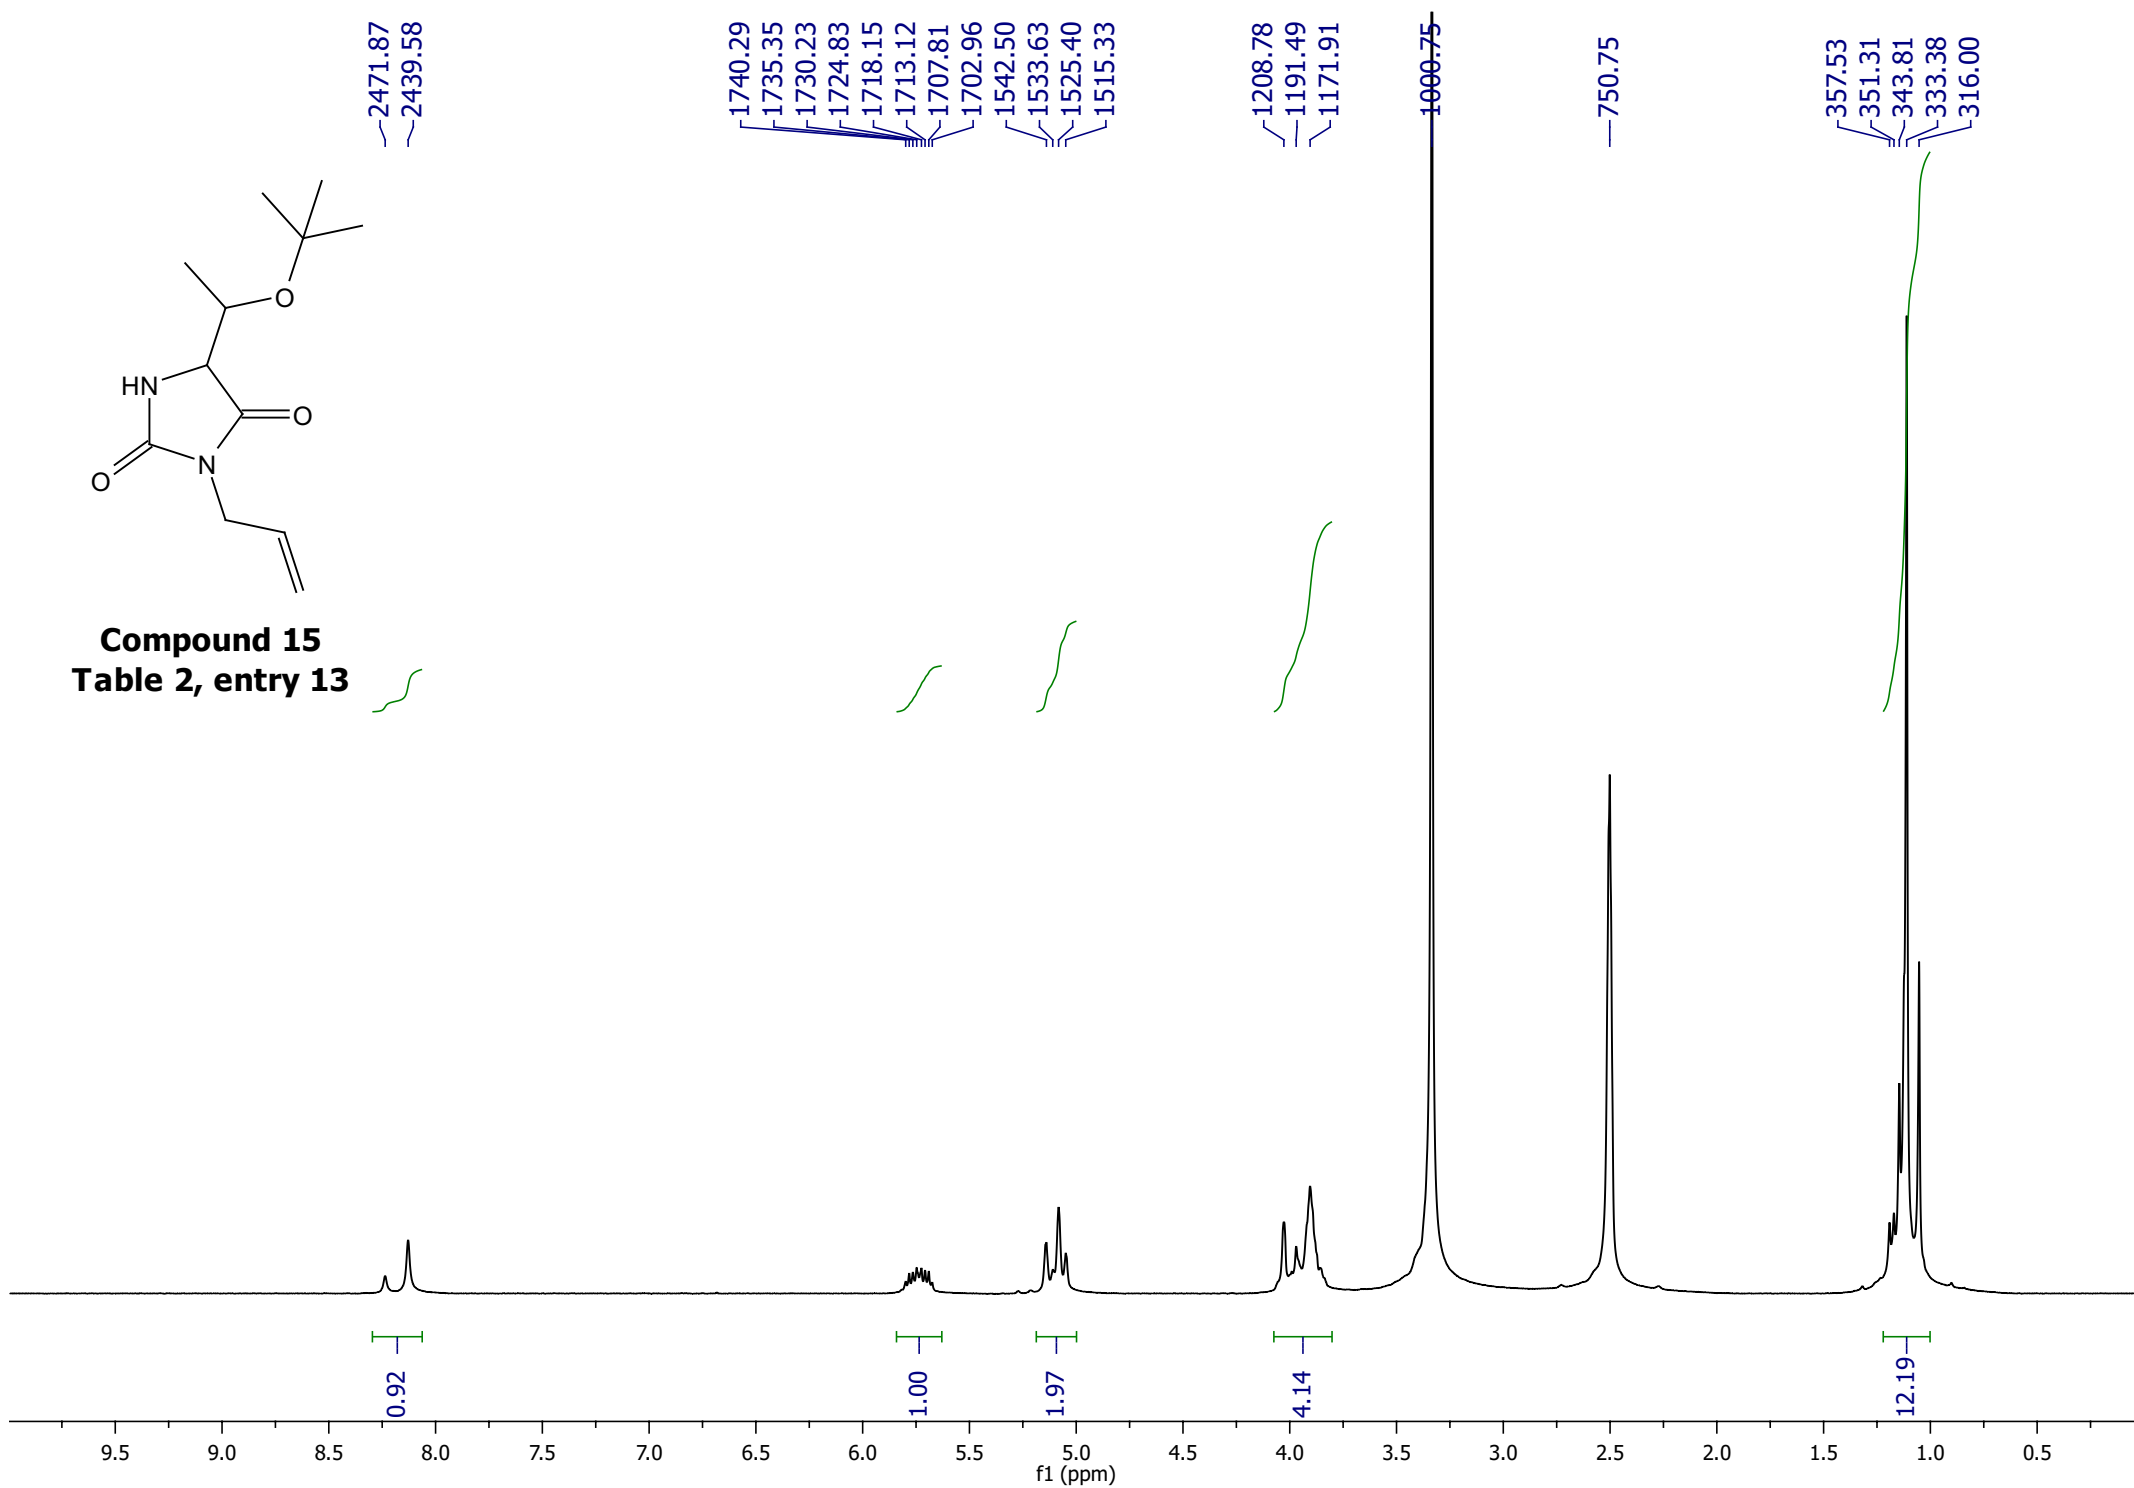

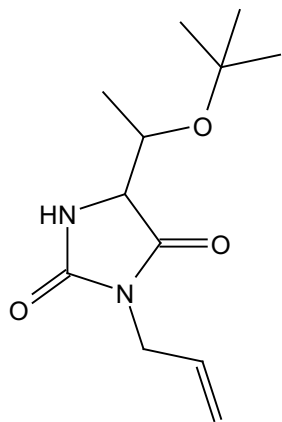

**Compound 15**  
**Table 2, entry 13**

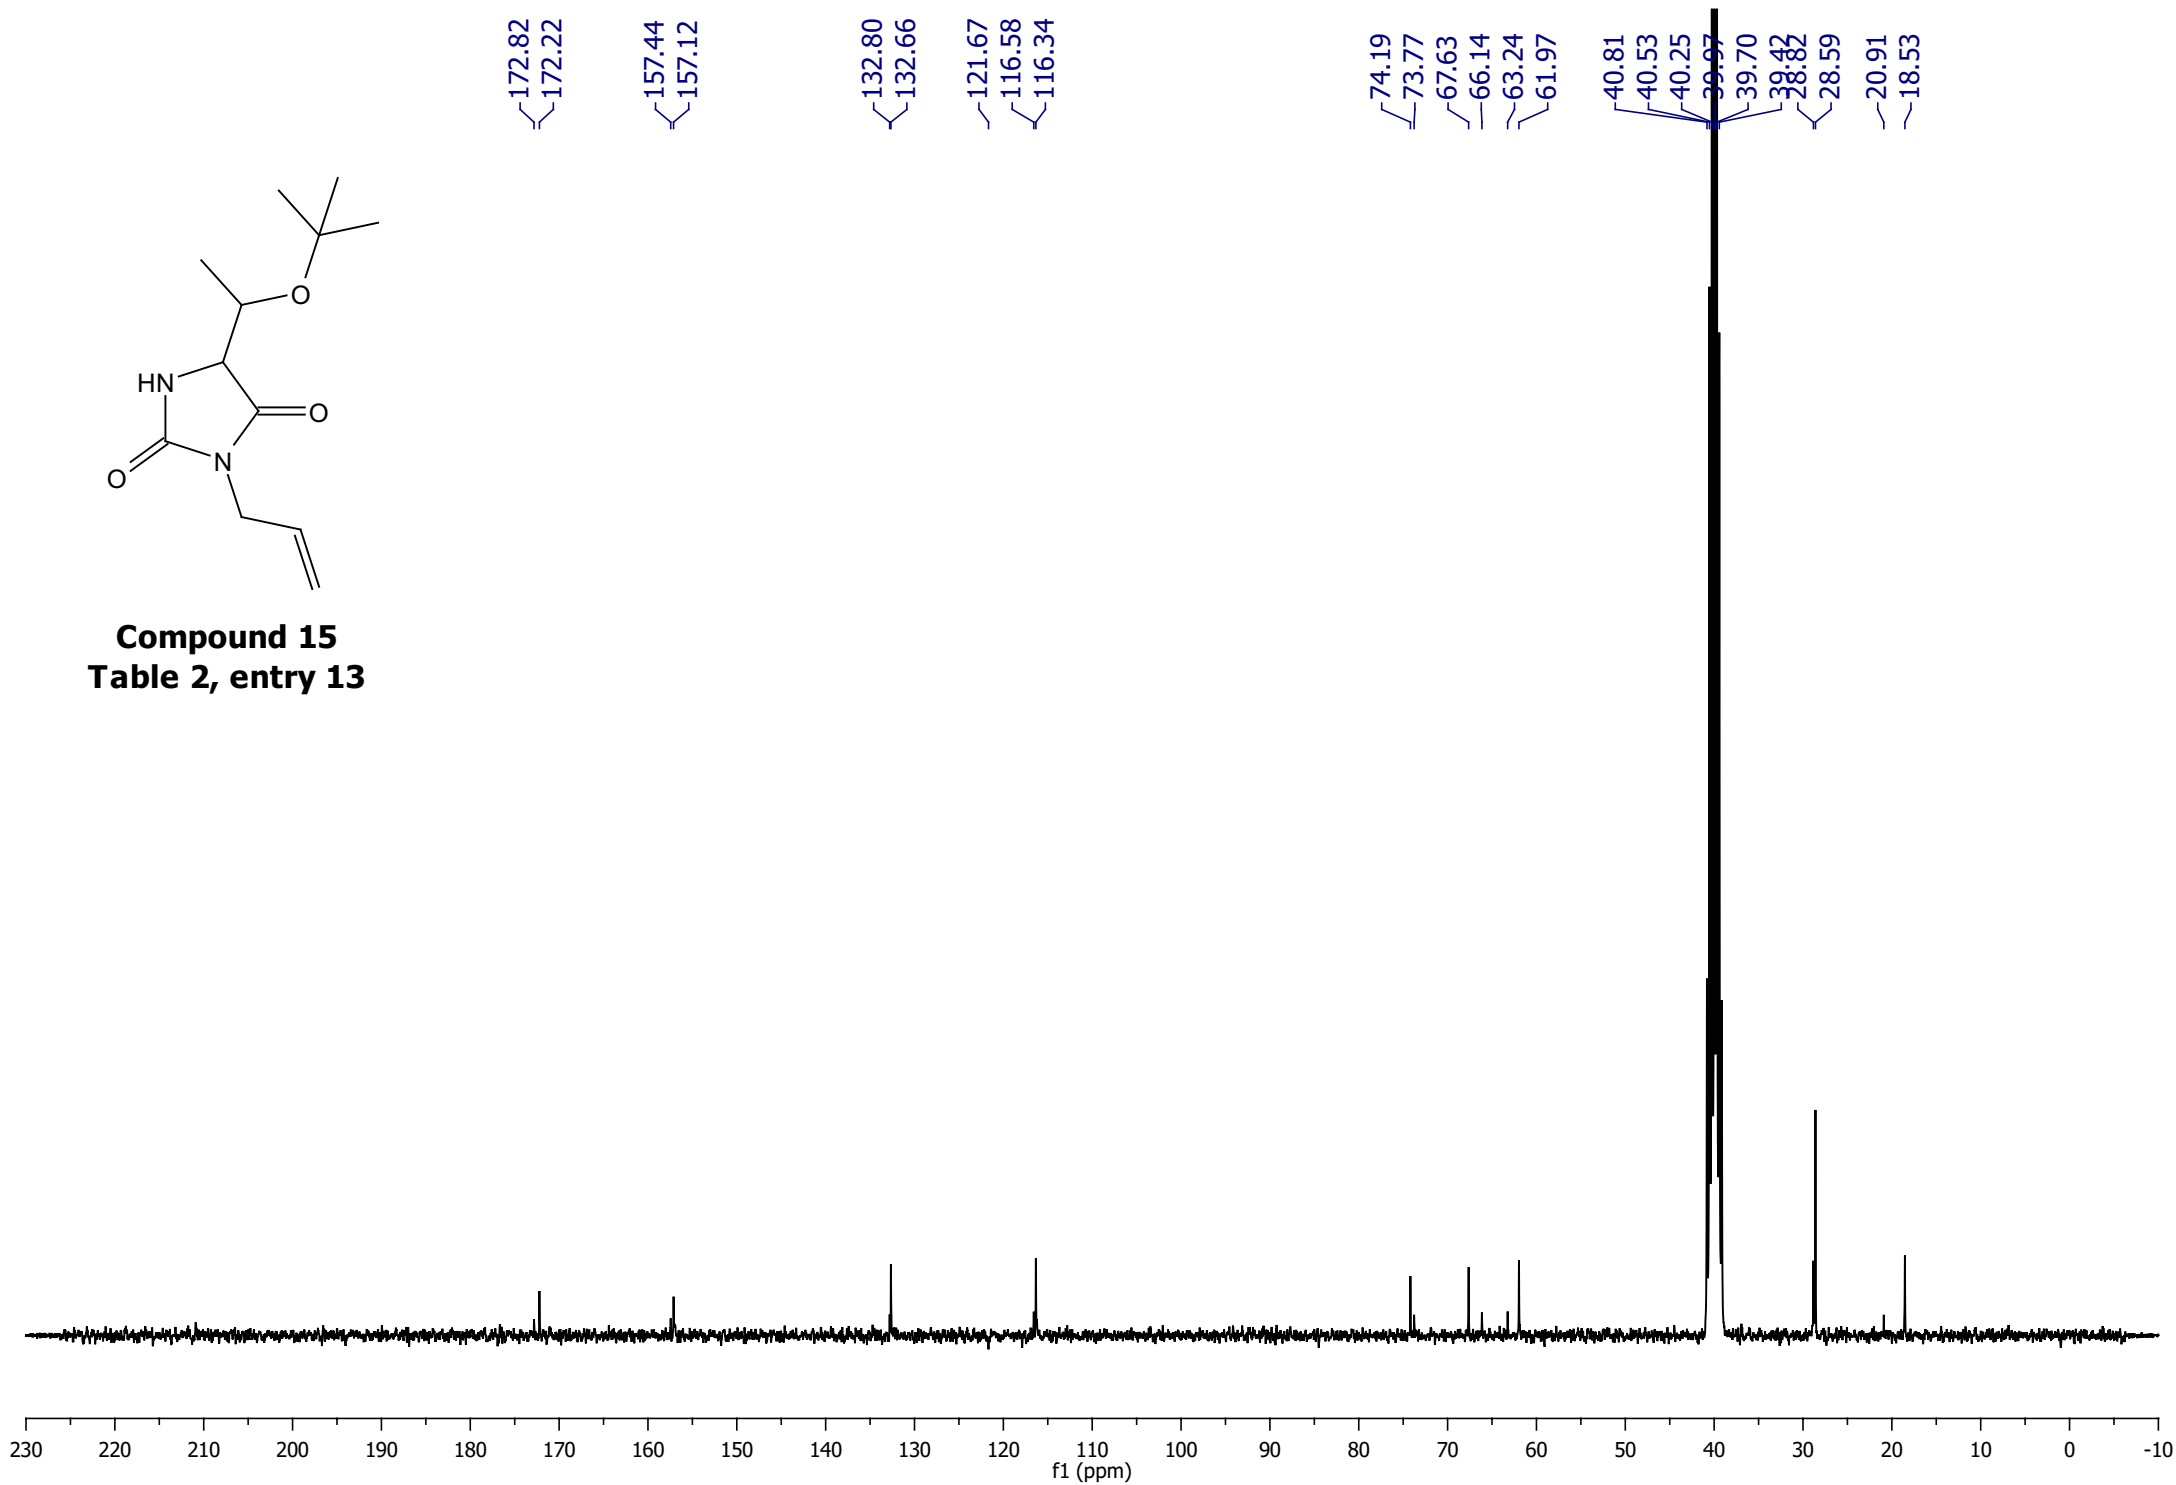

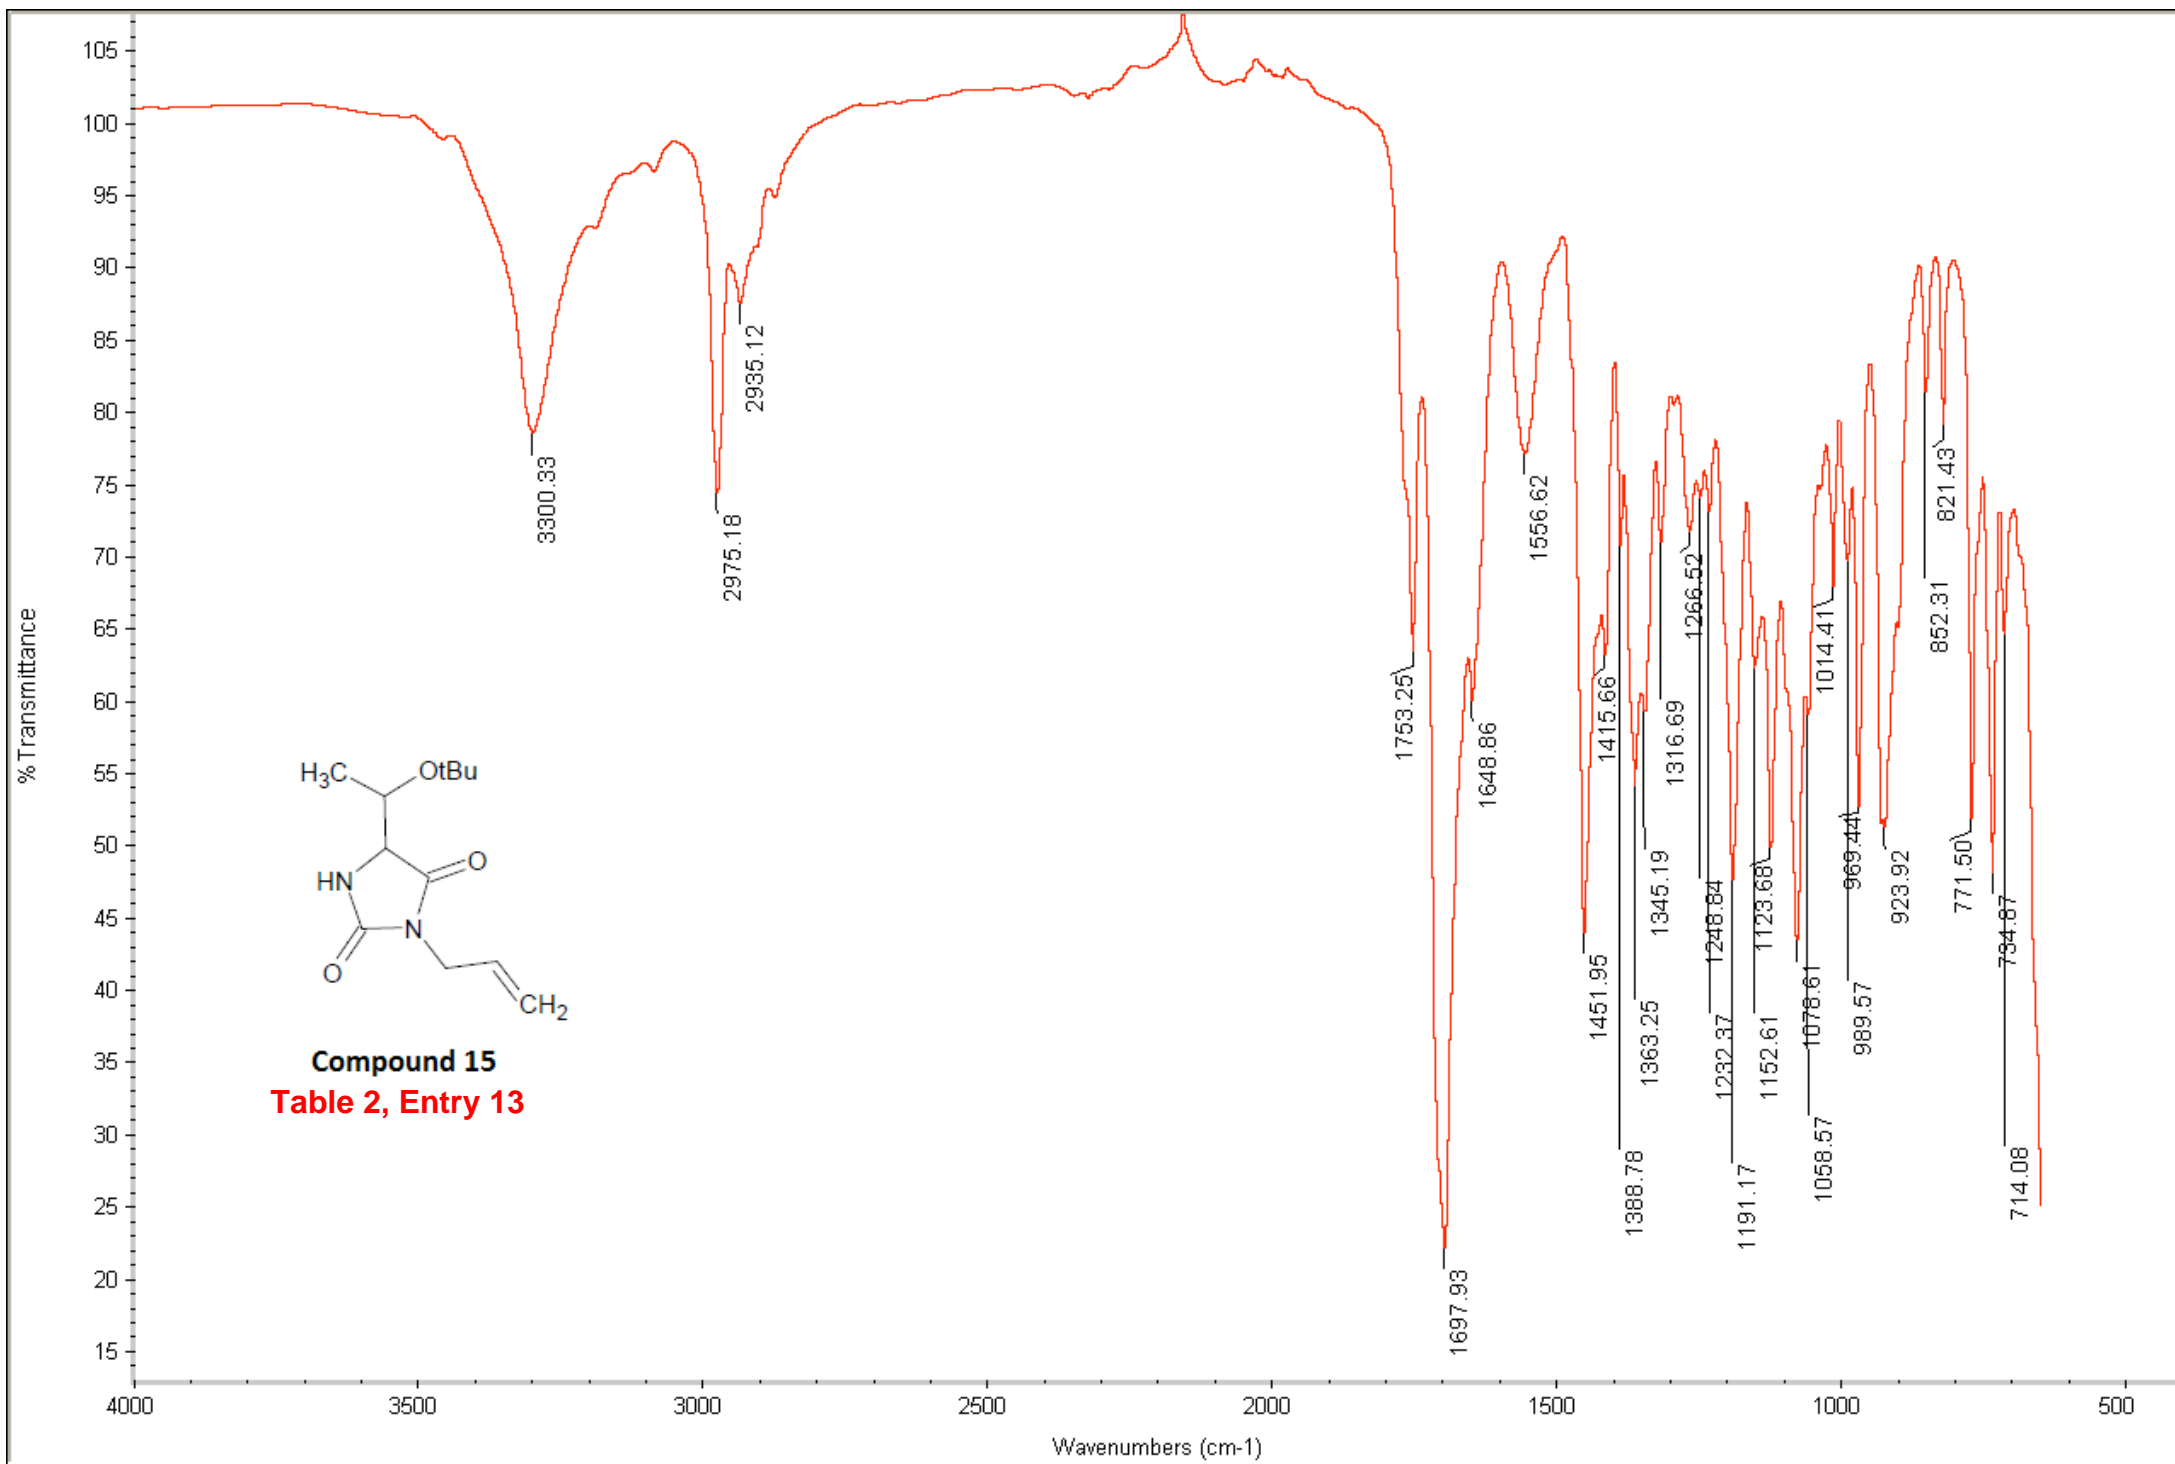

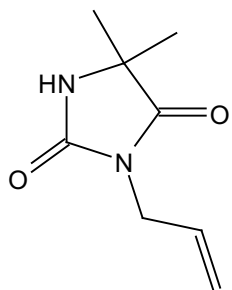

**Compound 16**  
**Table 2, entry 14**

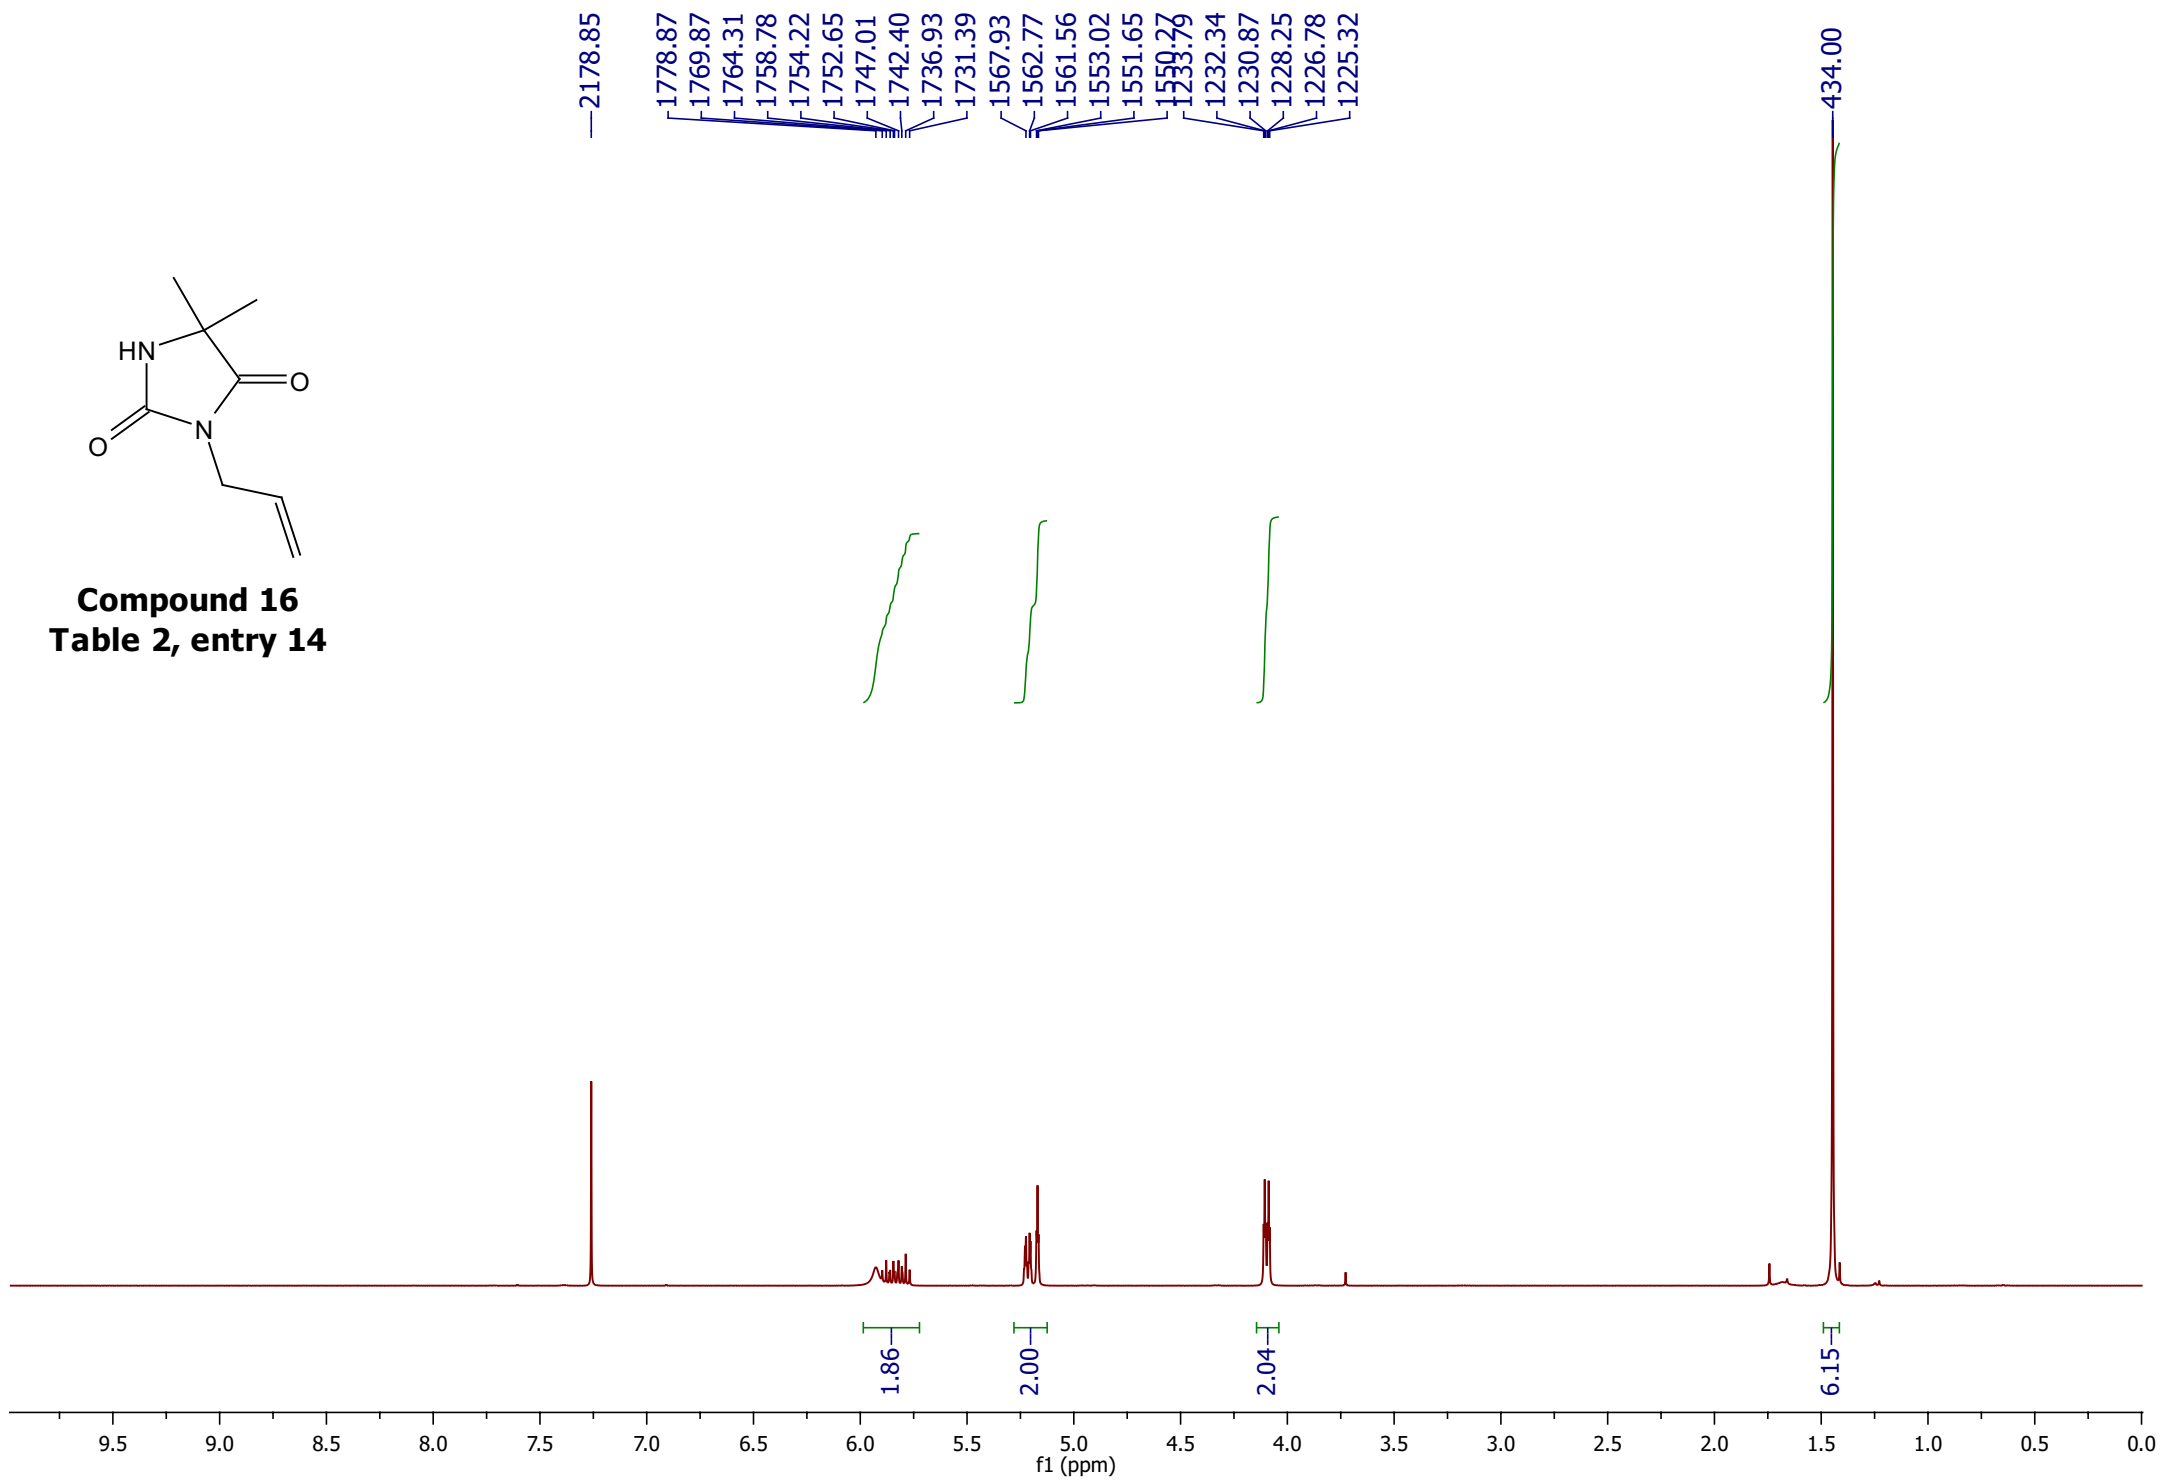



**Compound 16**  
**Table 2, entry 14**

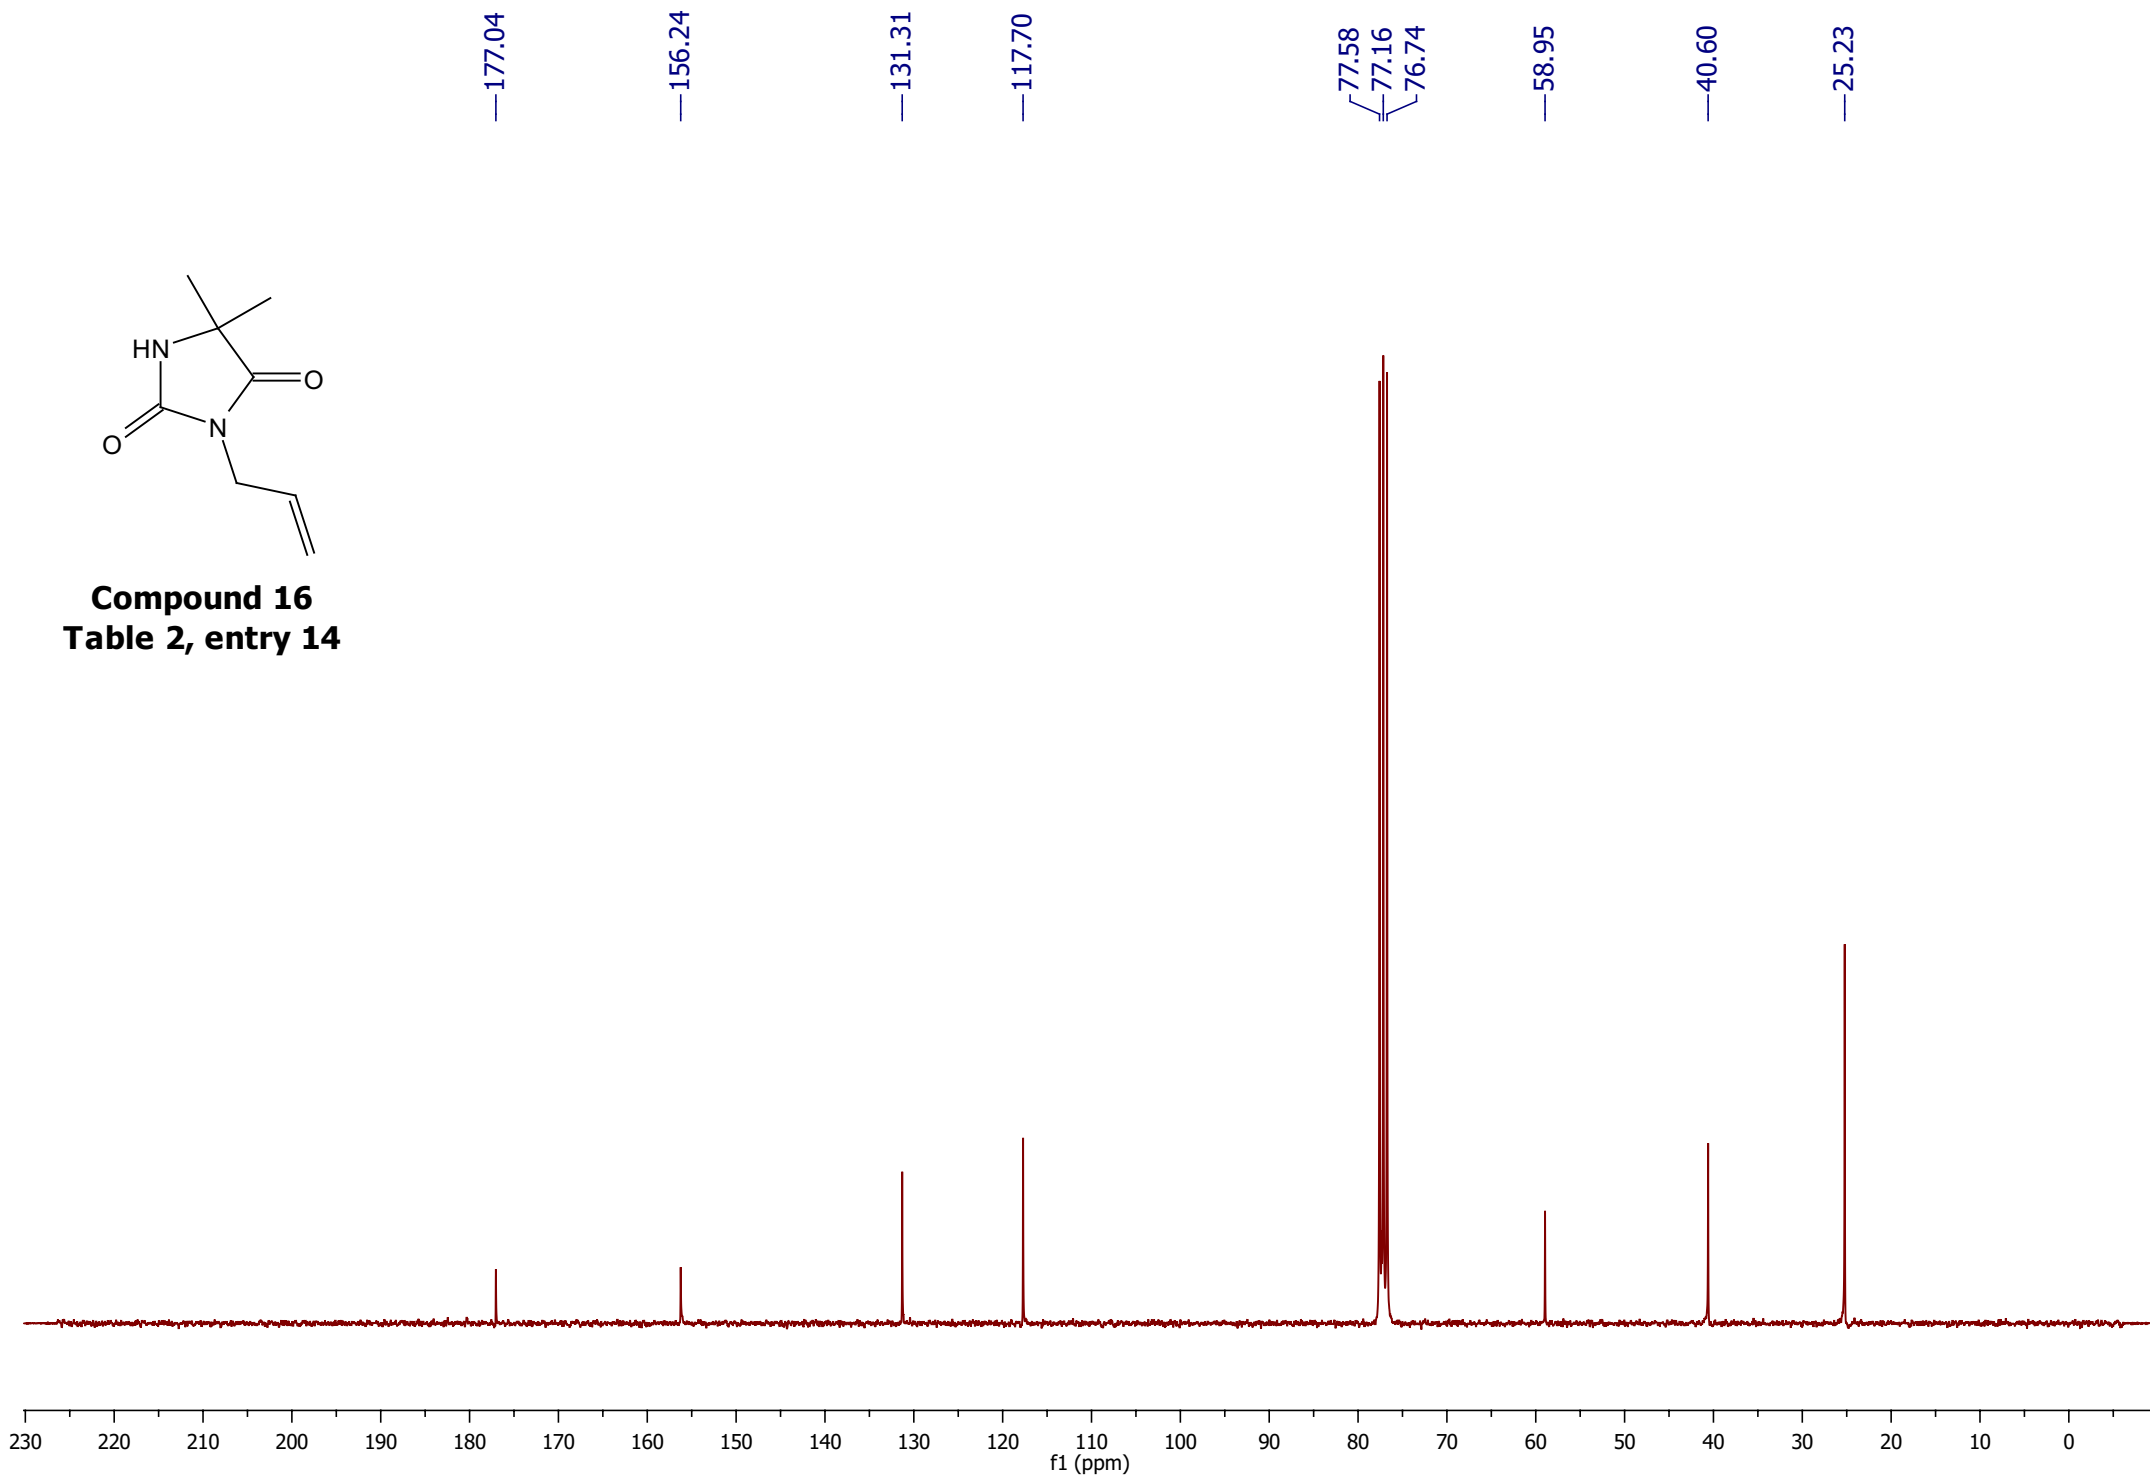

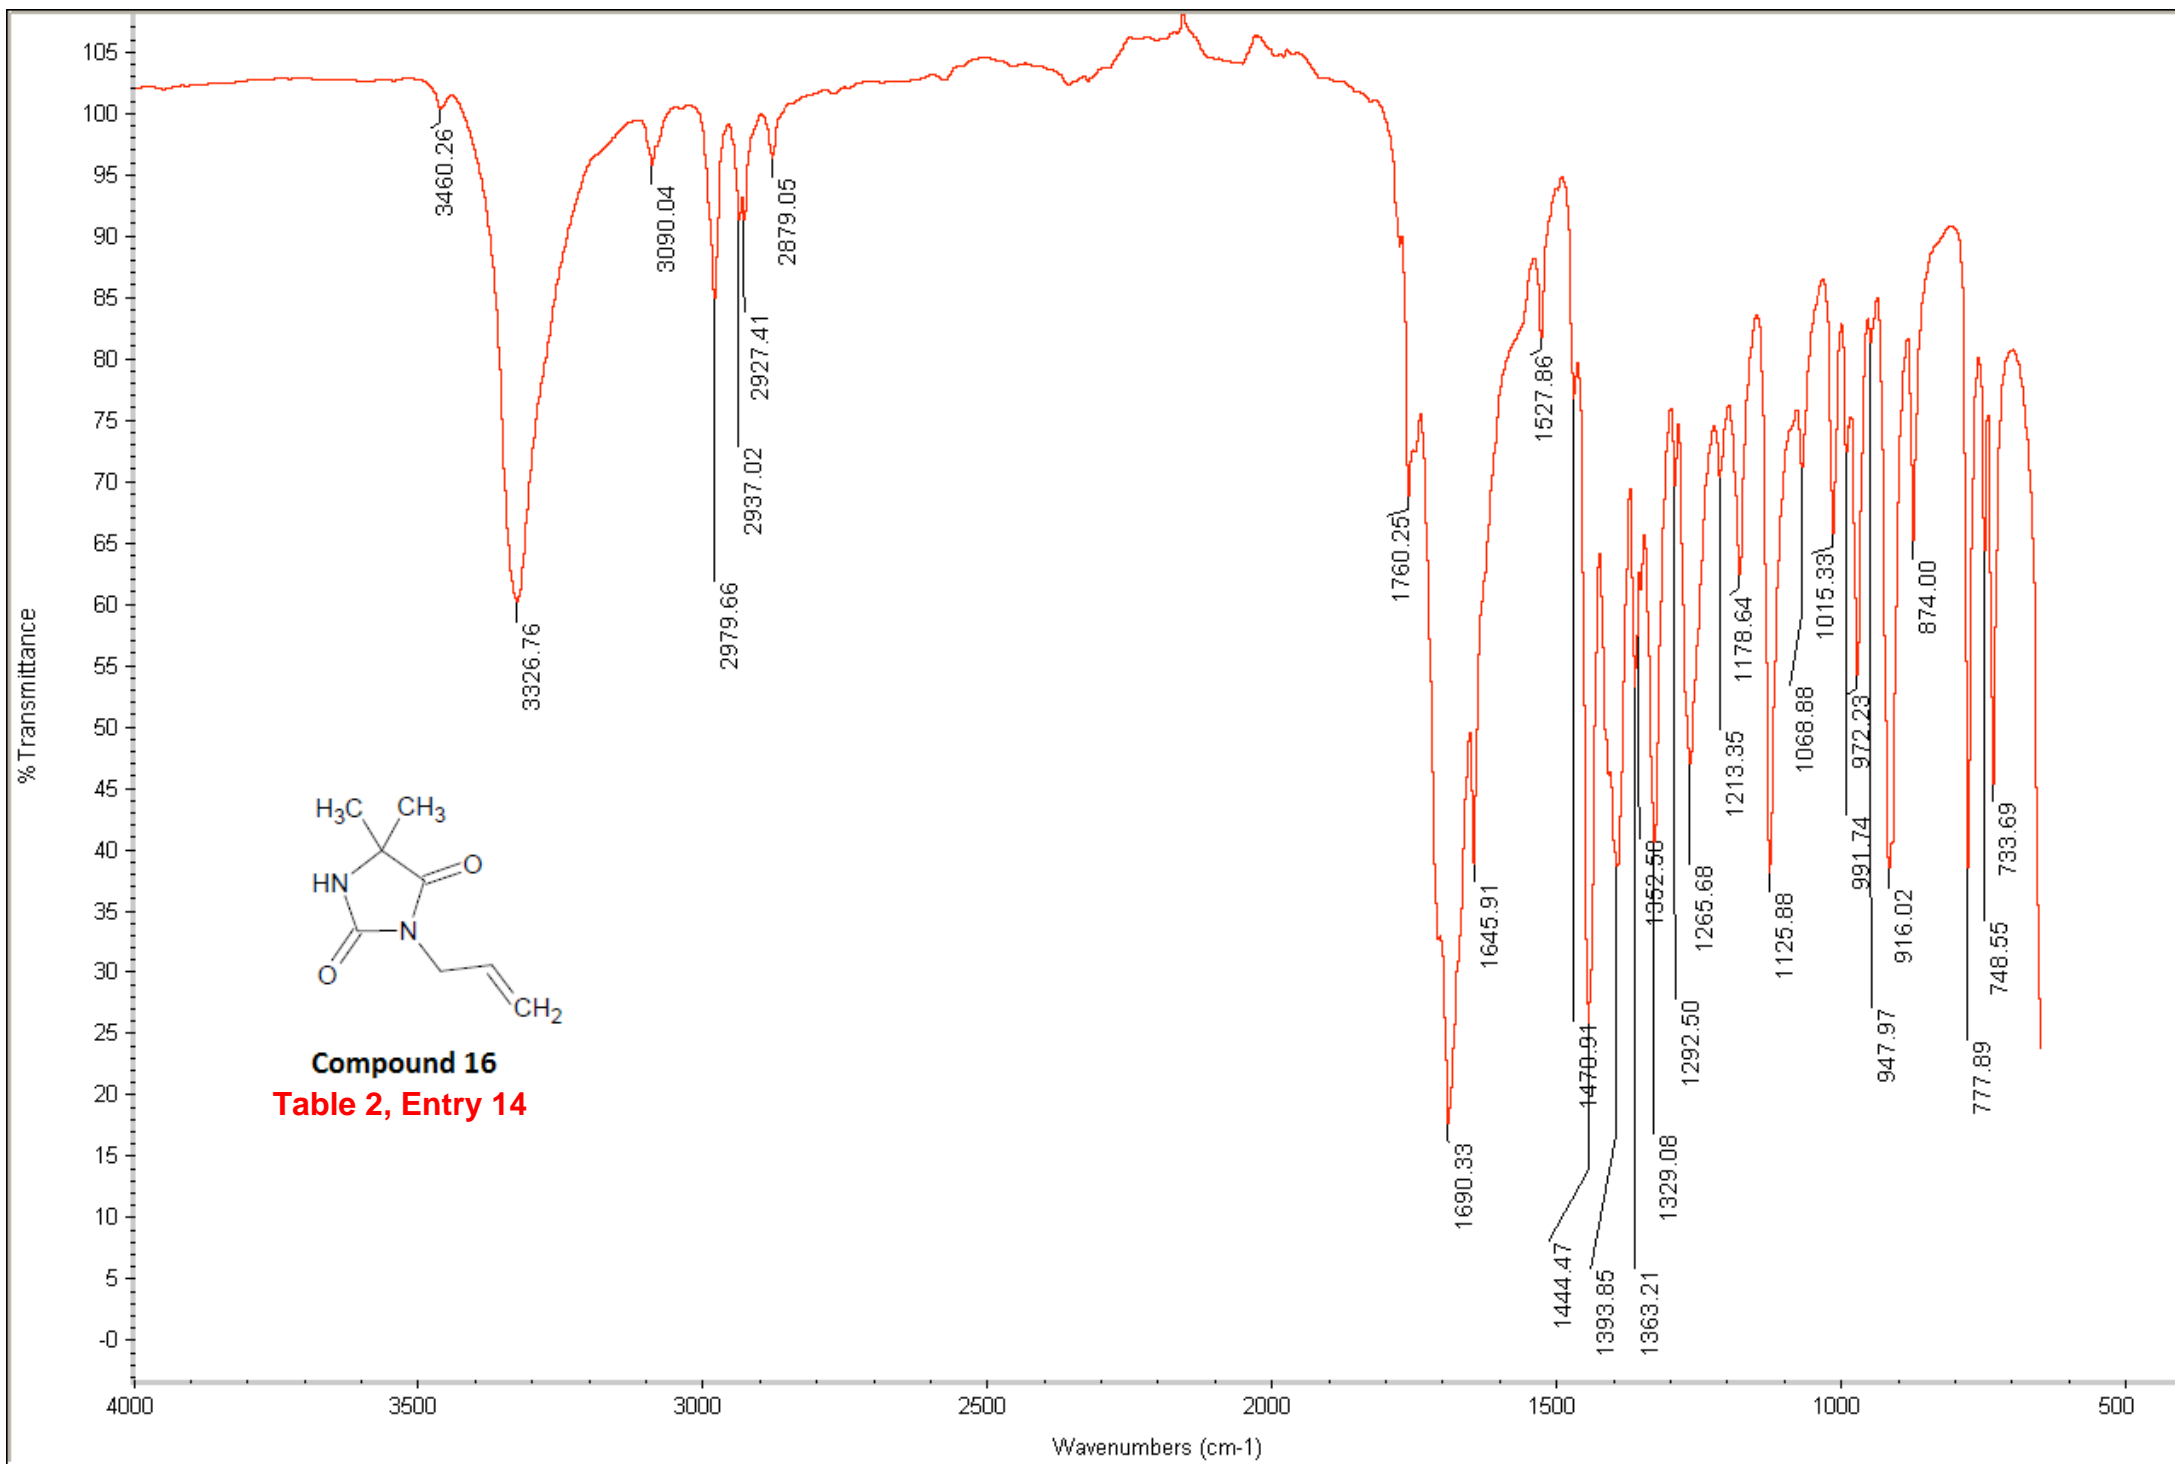

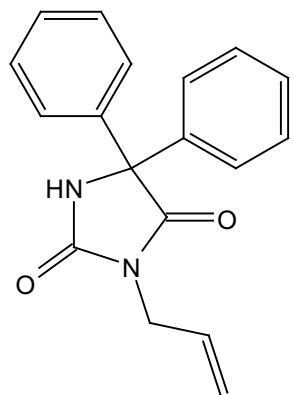

**Compound 17**  
**Table 2, entry 15**

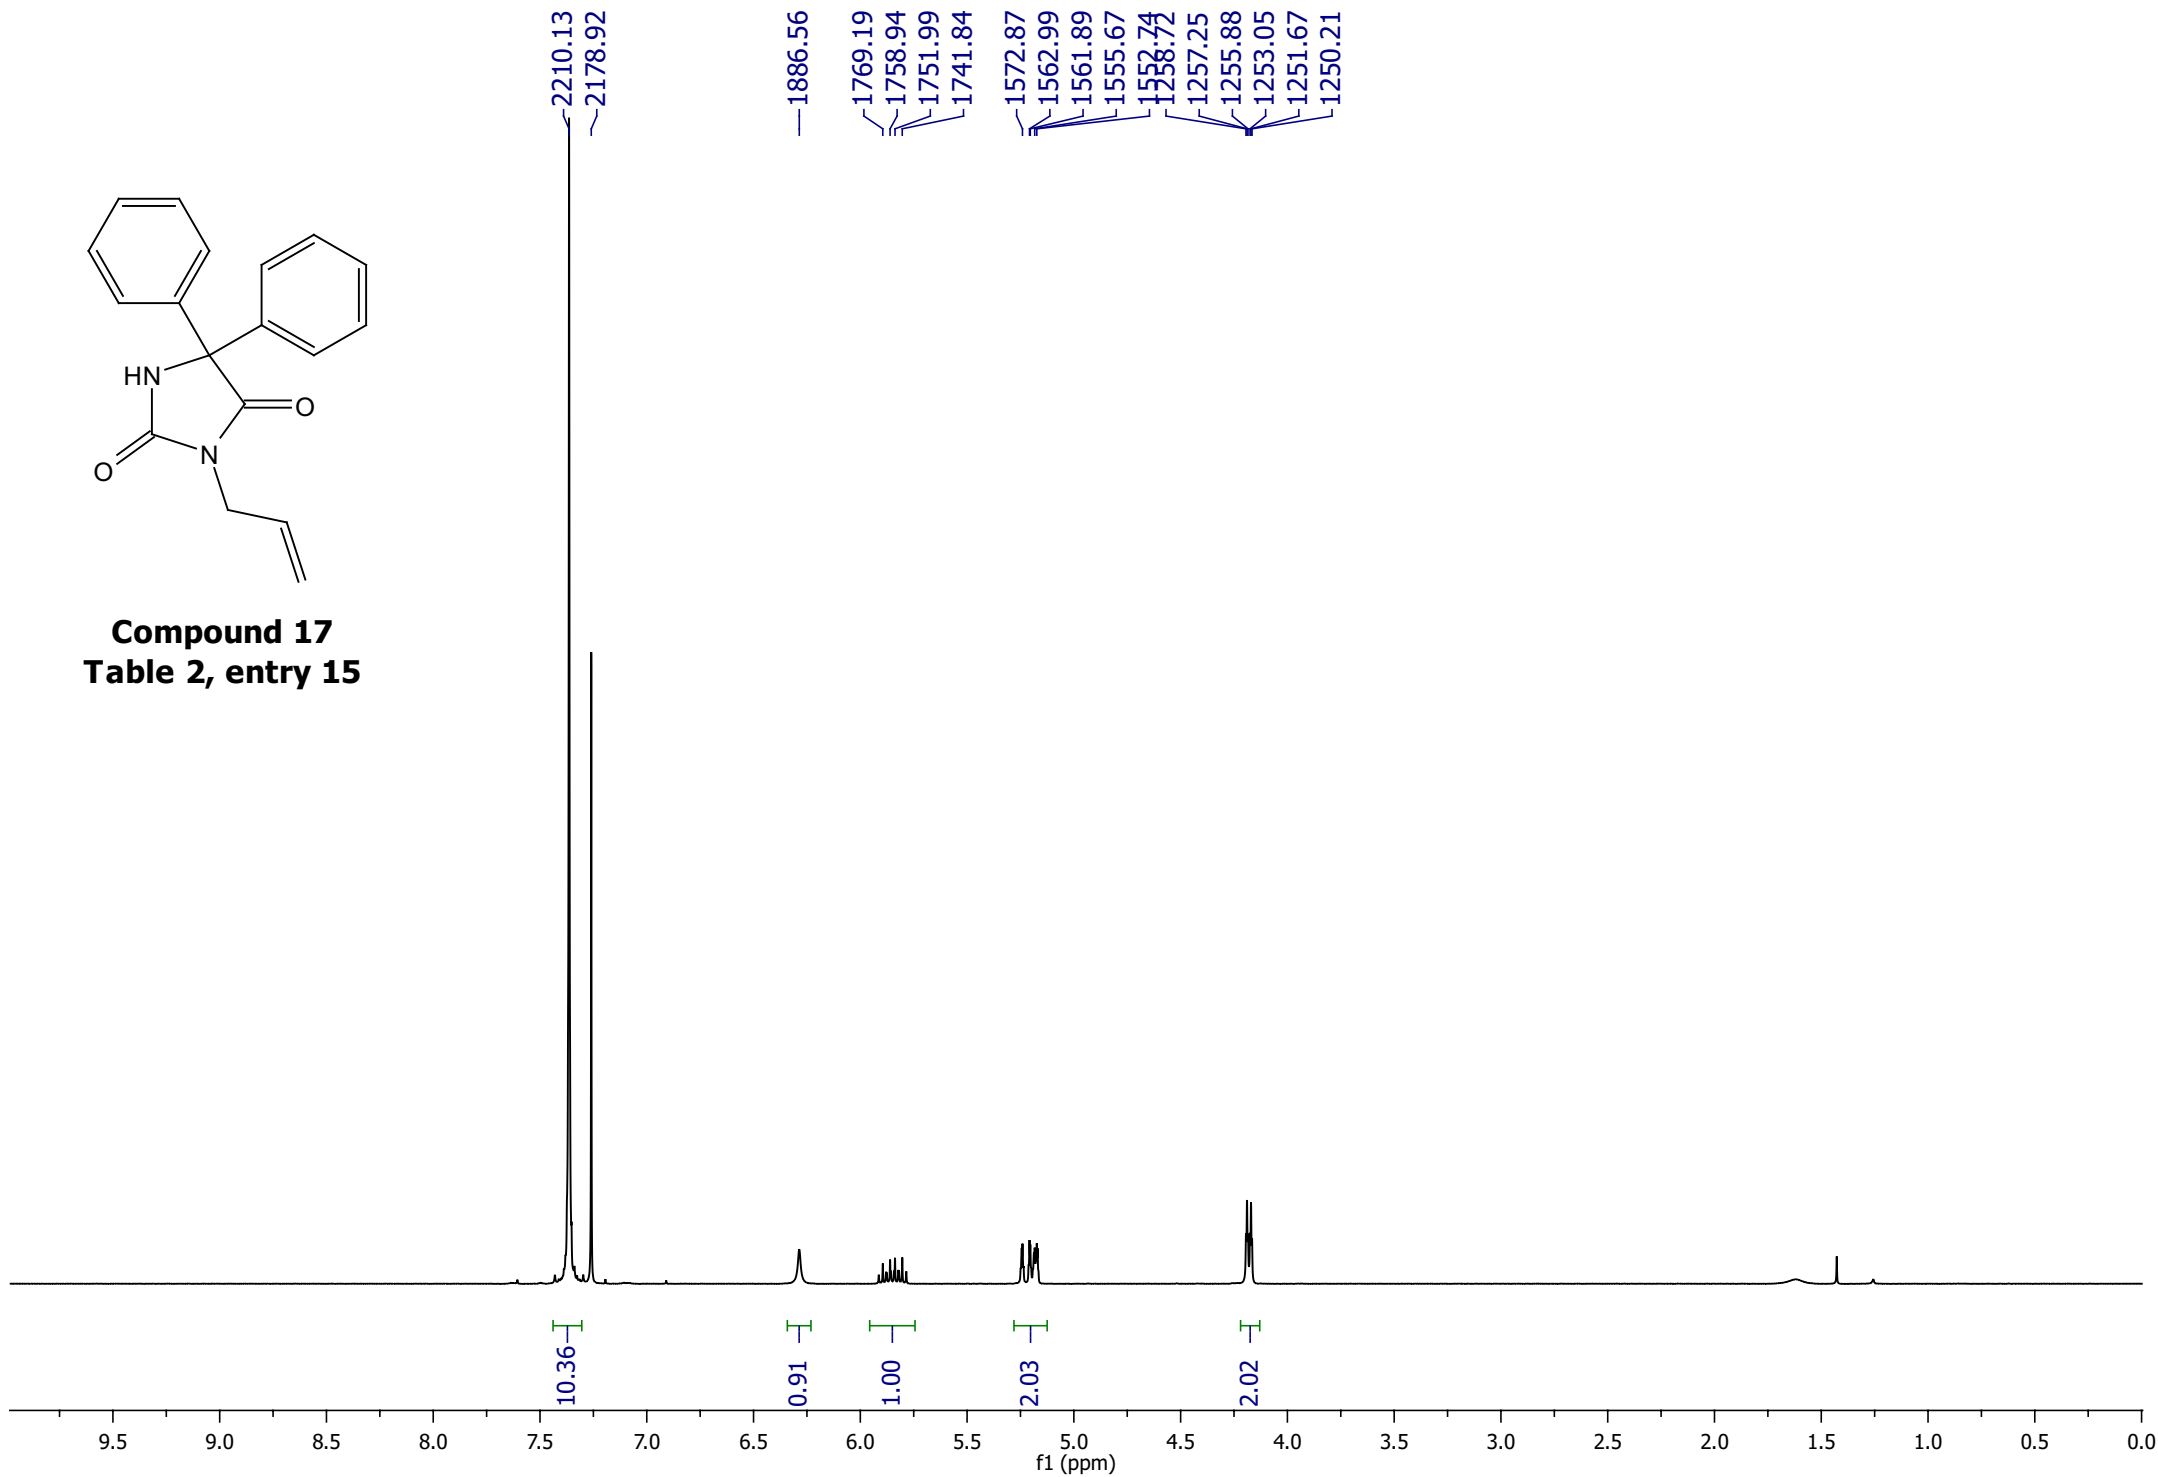



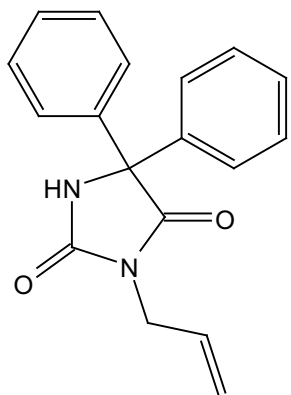

**Compound 17**  
**Table 2, entry 15**

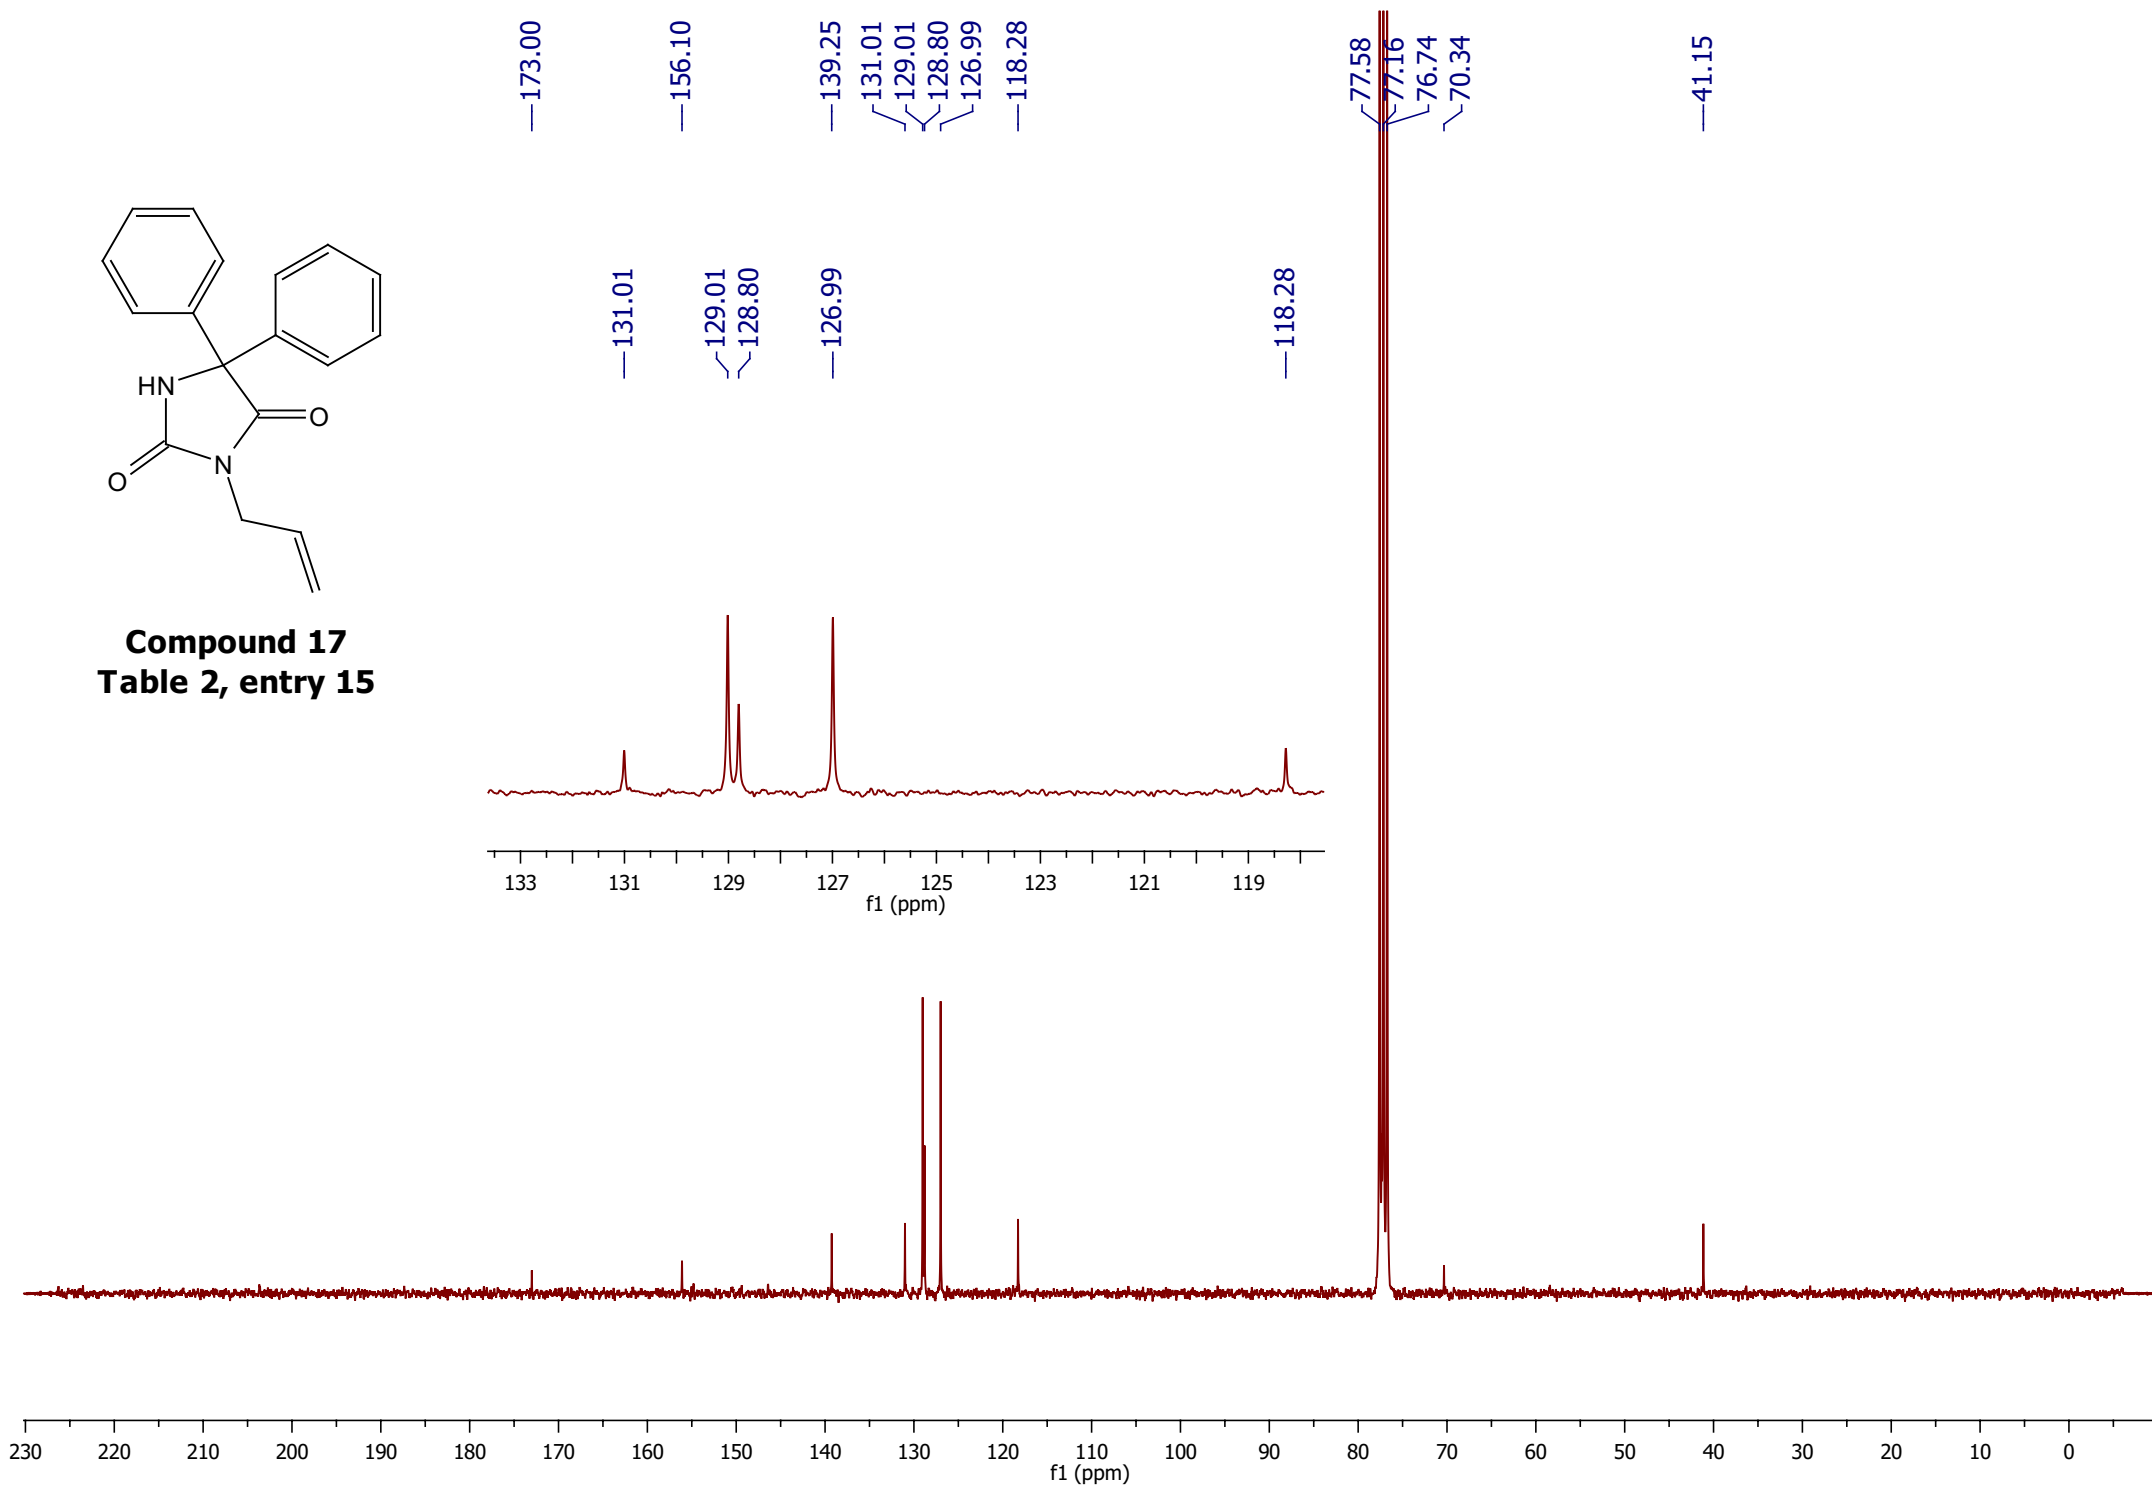

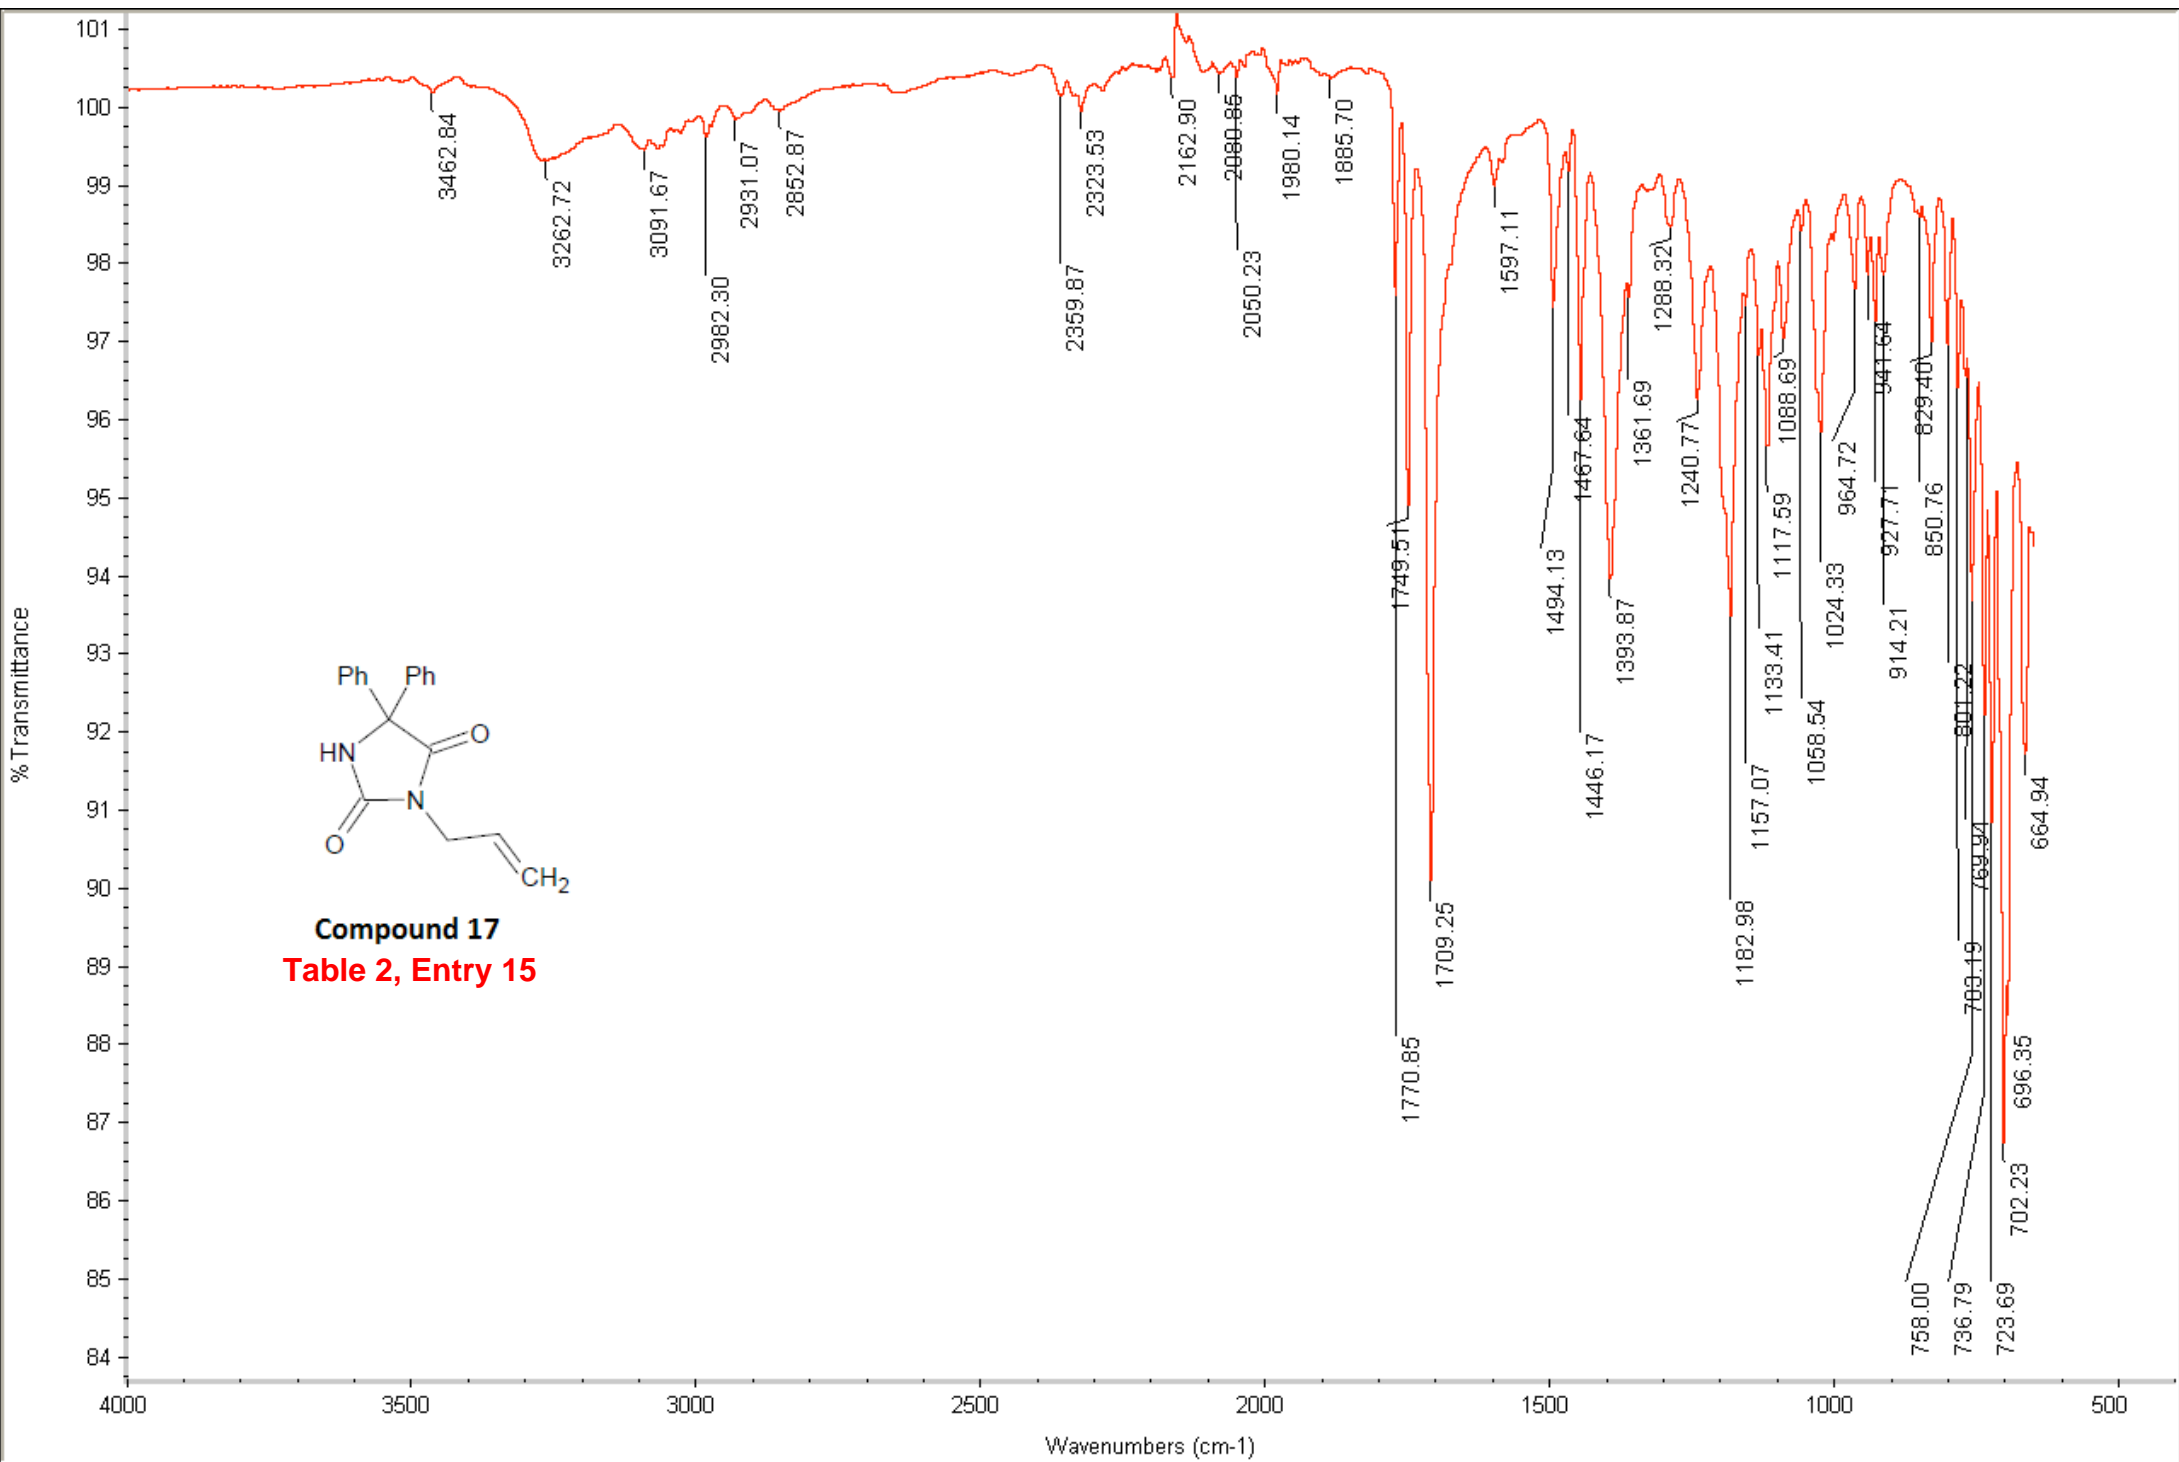

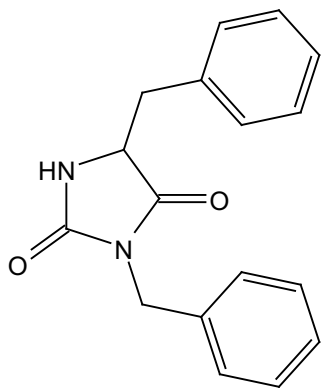

**Compound 18**  
**Table 2, entry 16**

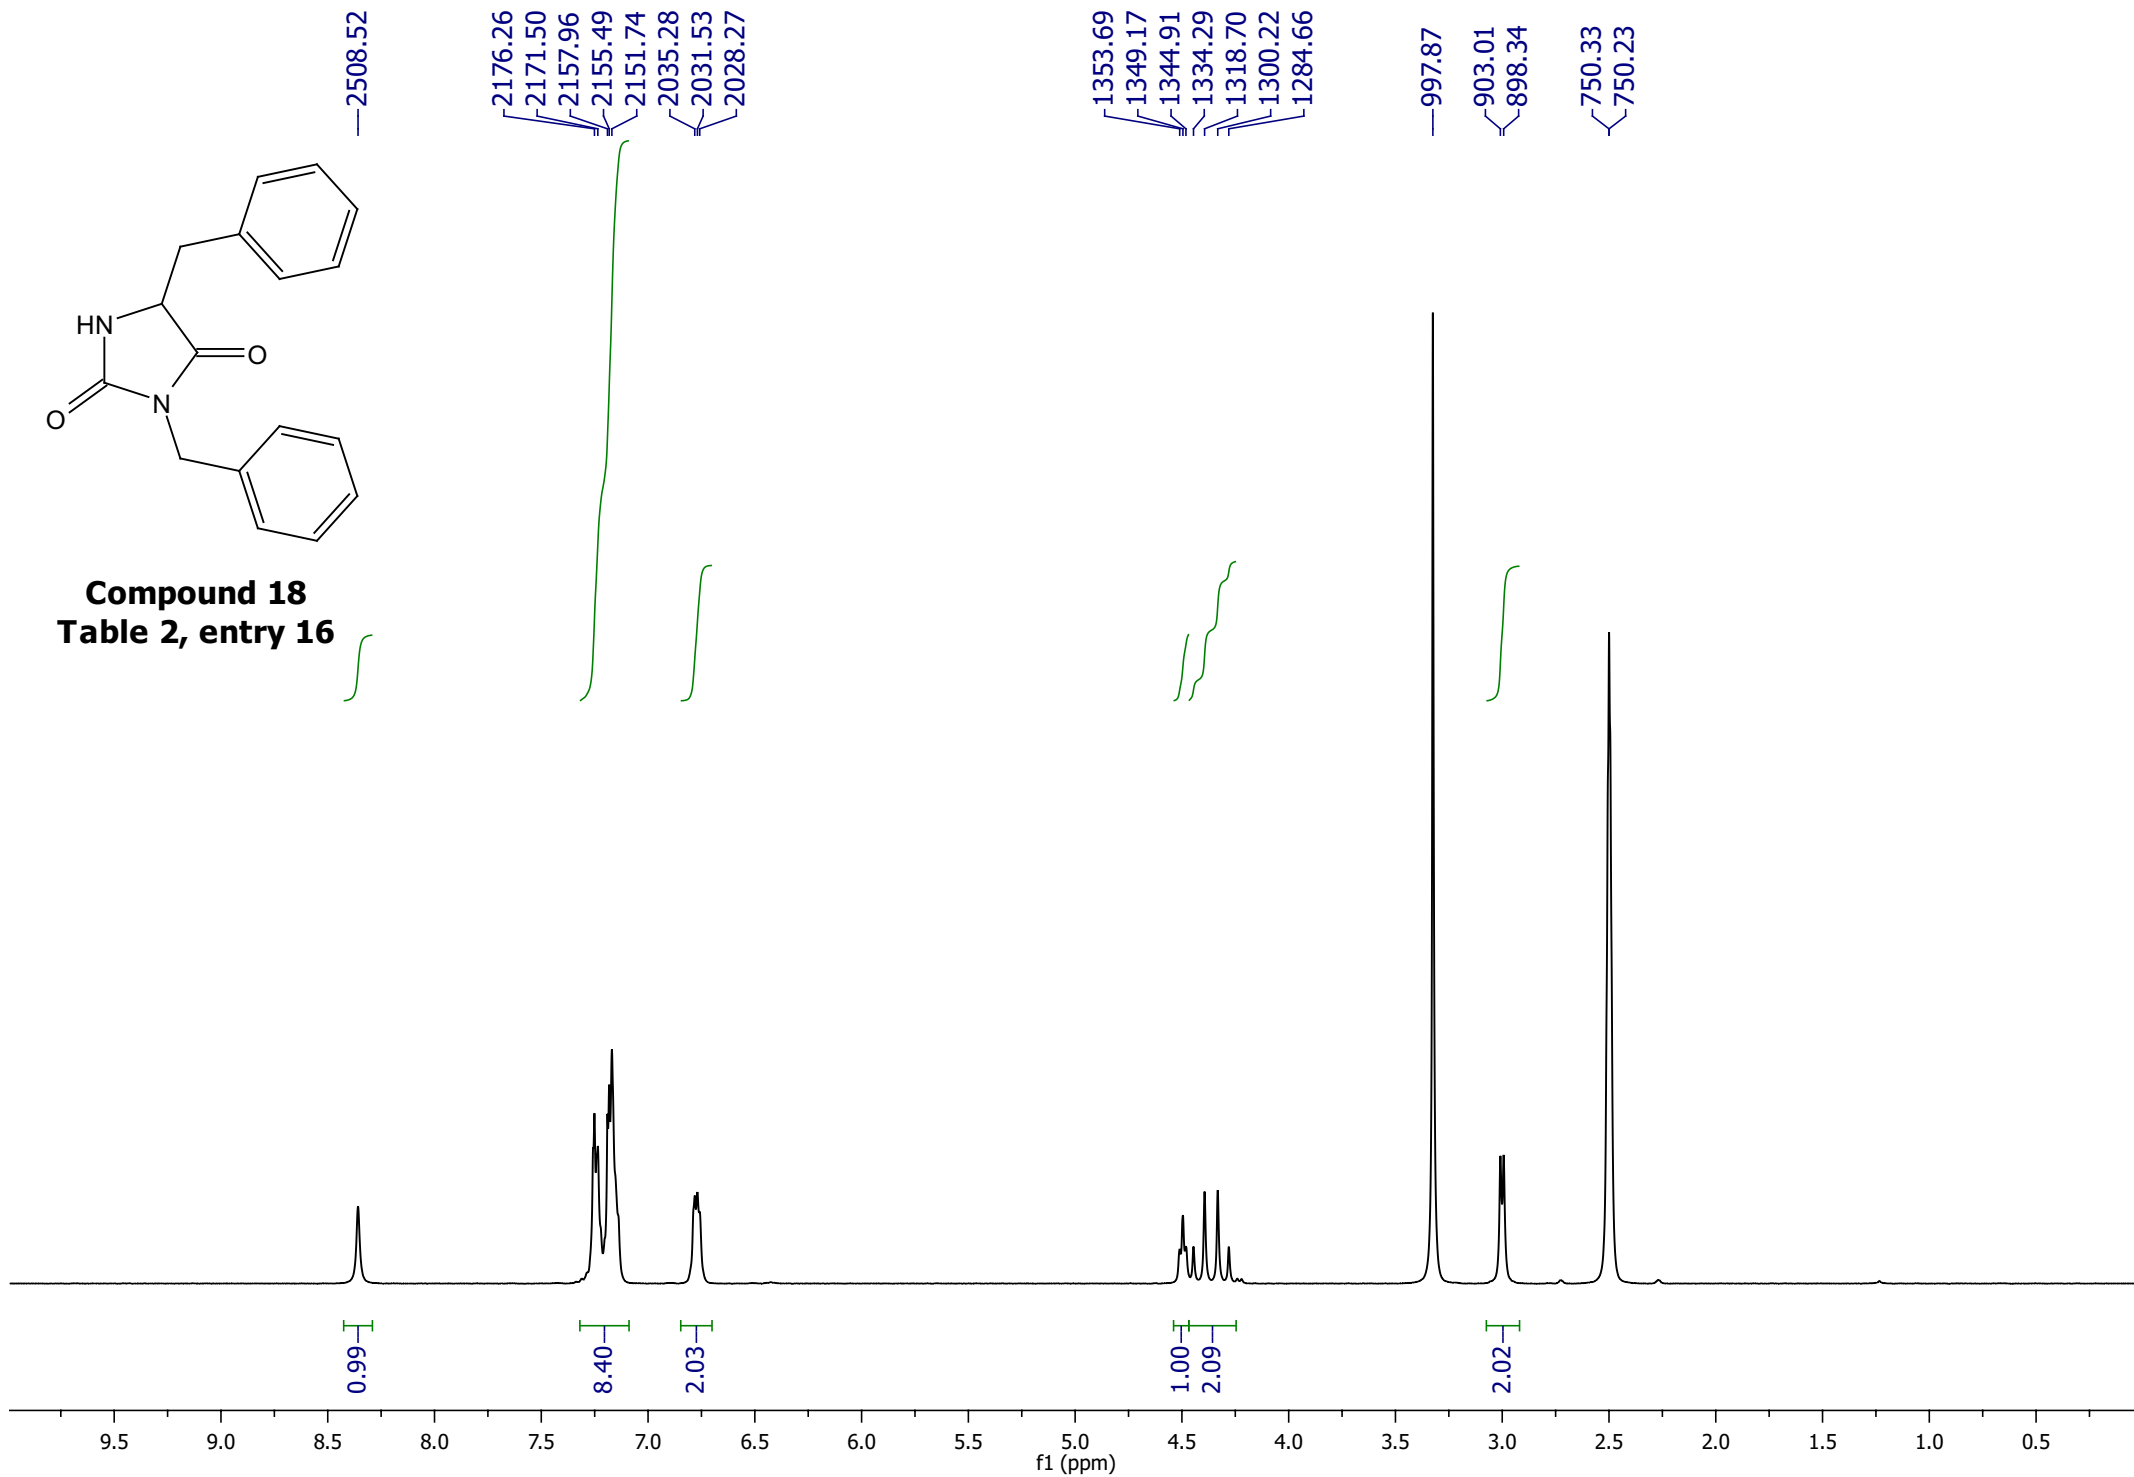



**Compound 18**  
**Table 2, entry 16**

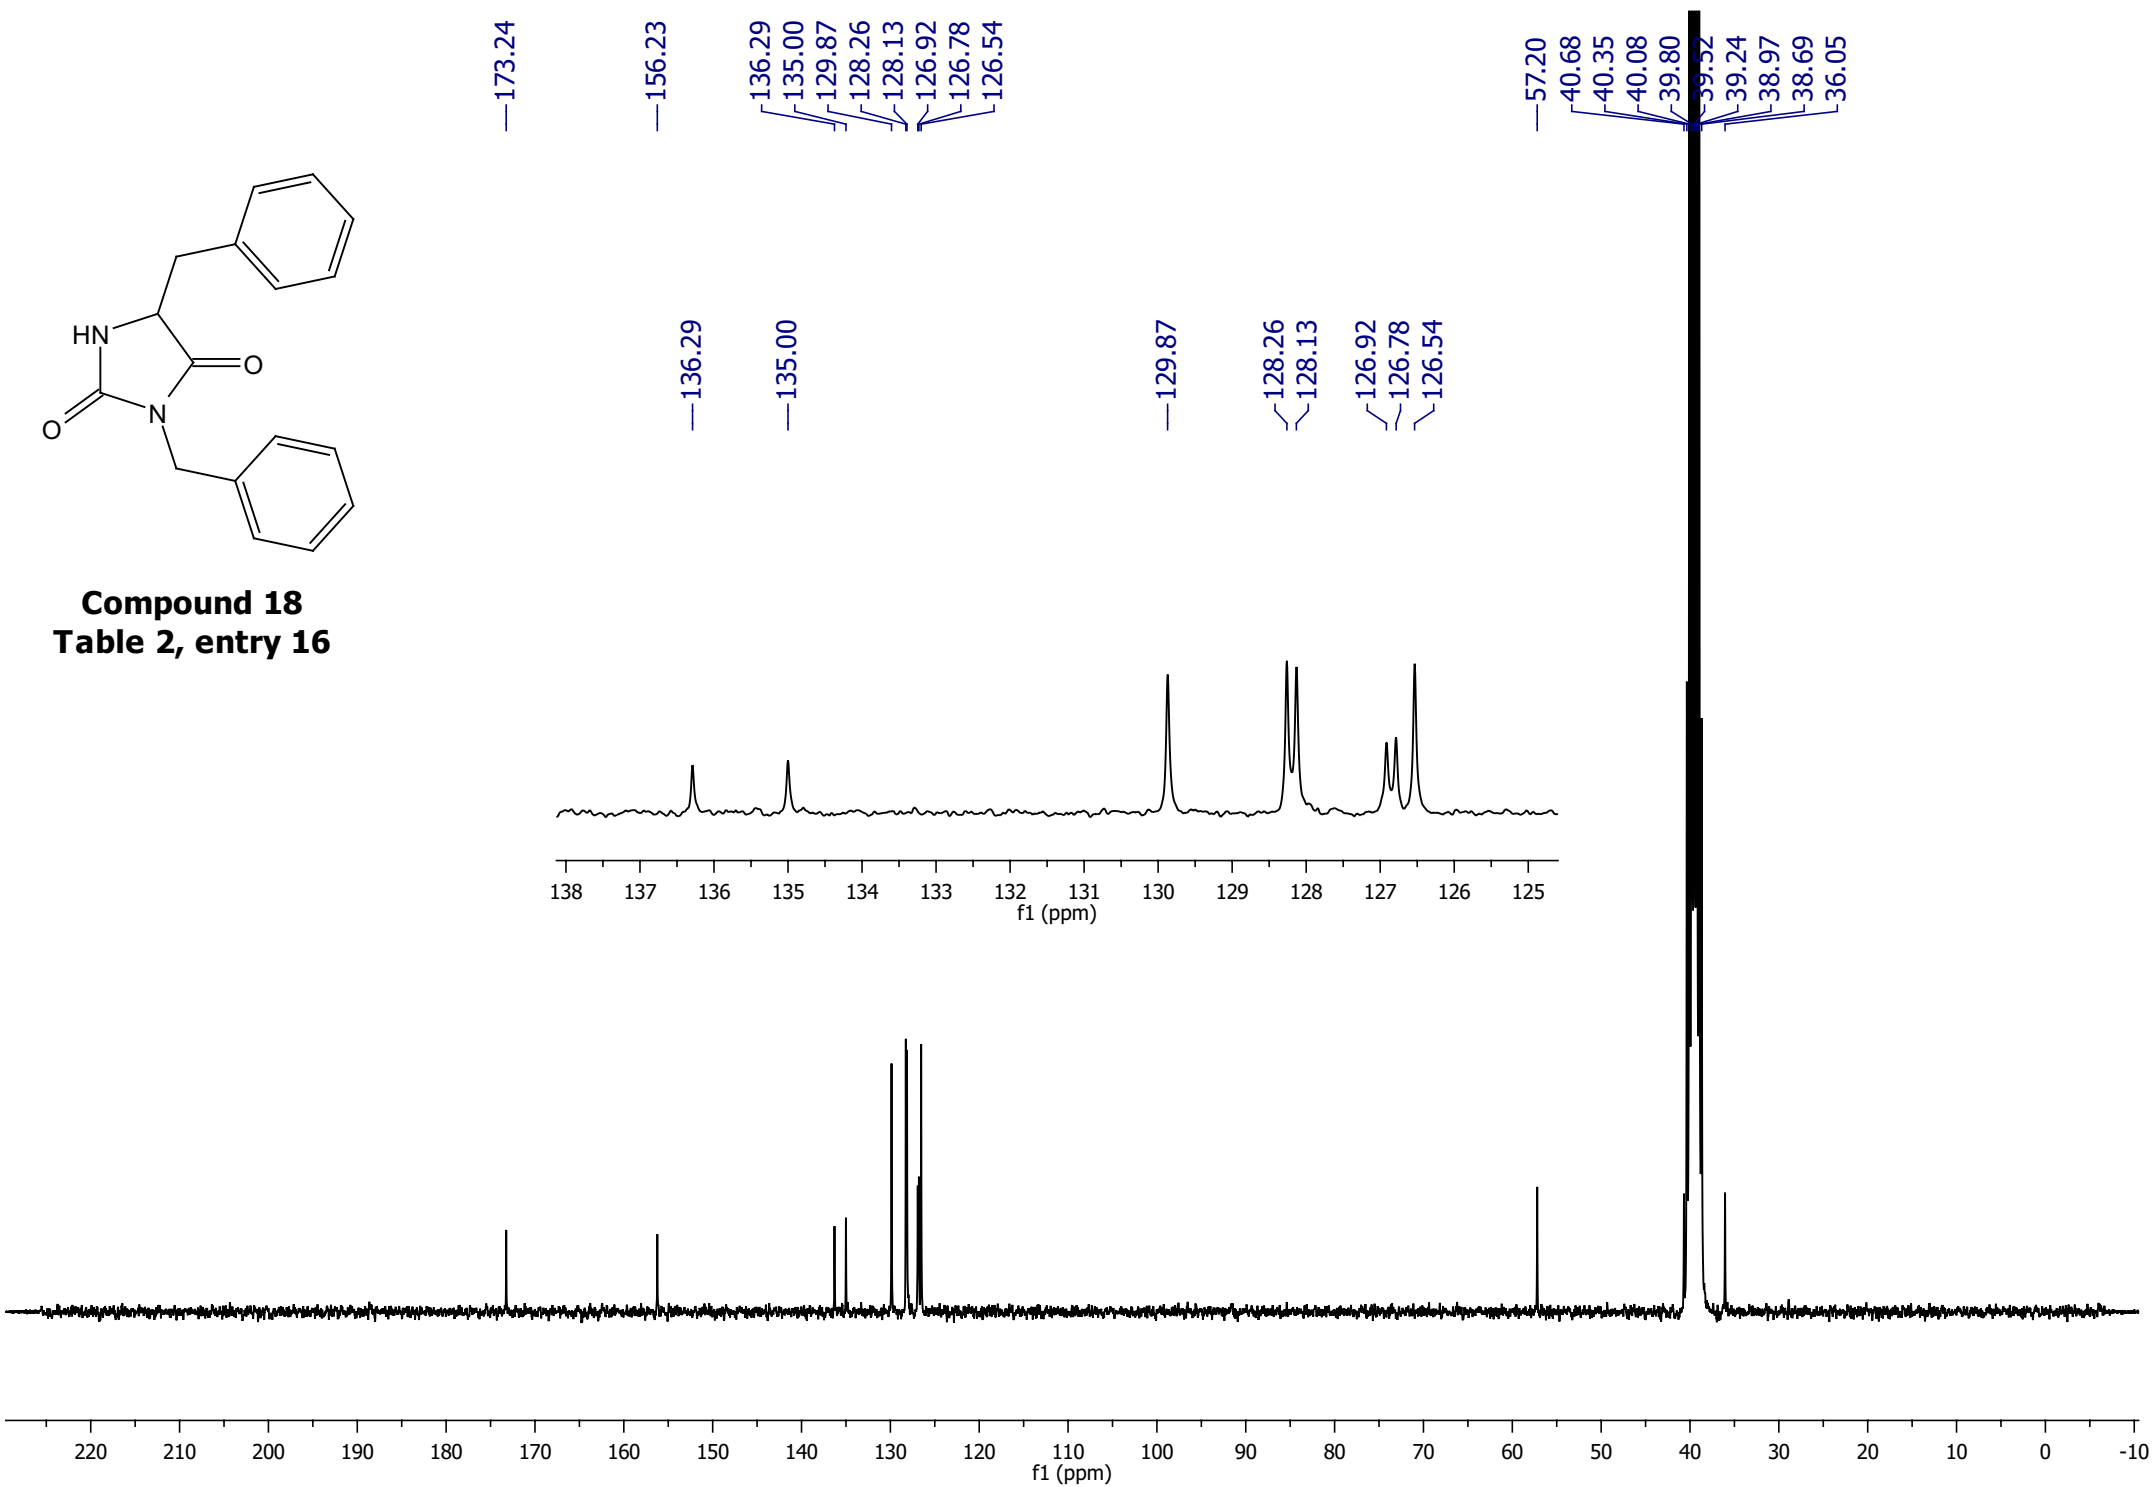

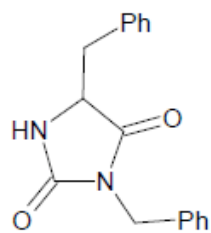

**Compound 18**

**Table 2, Entry 16**

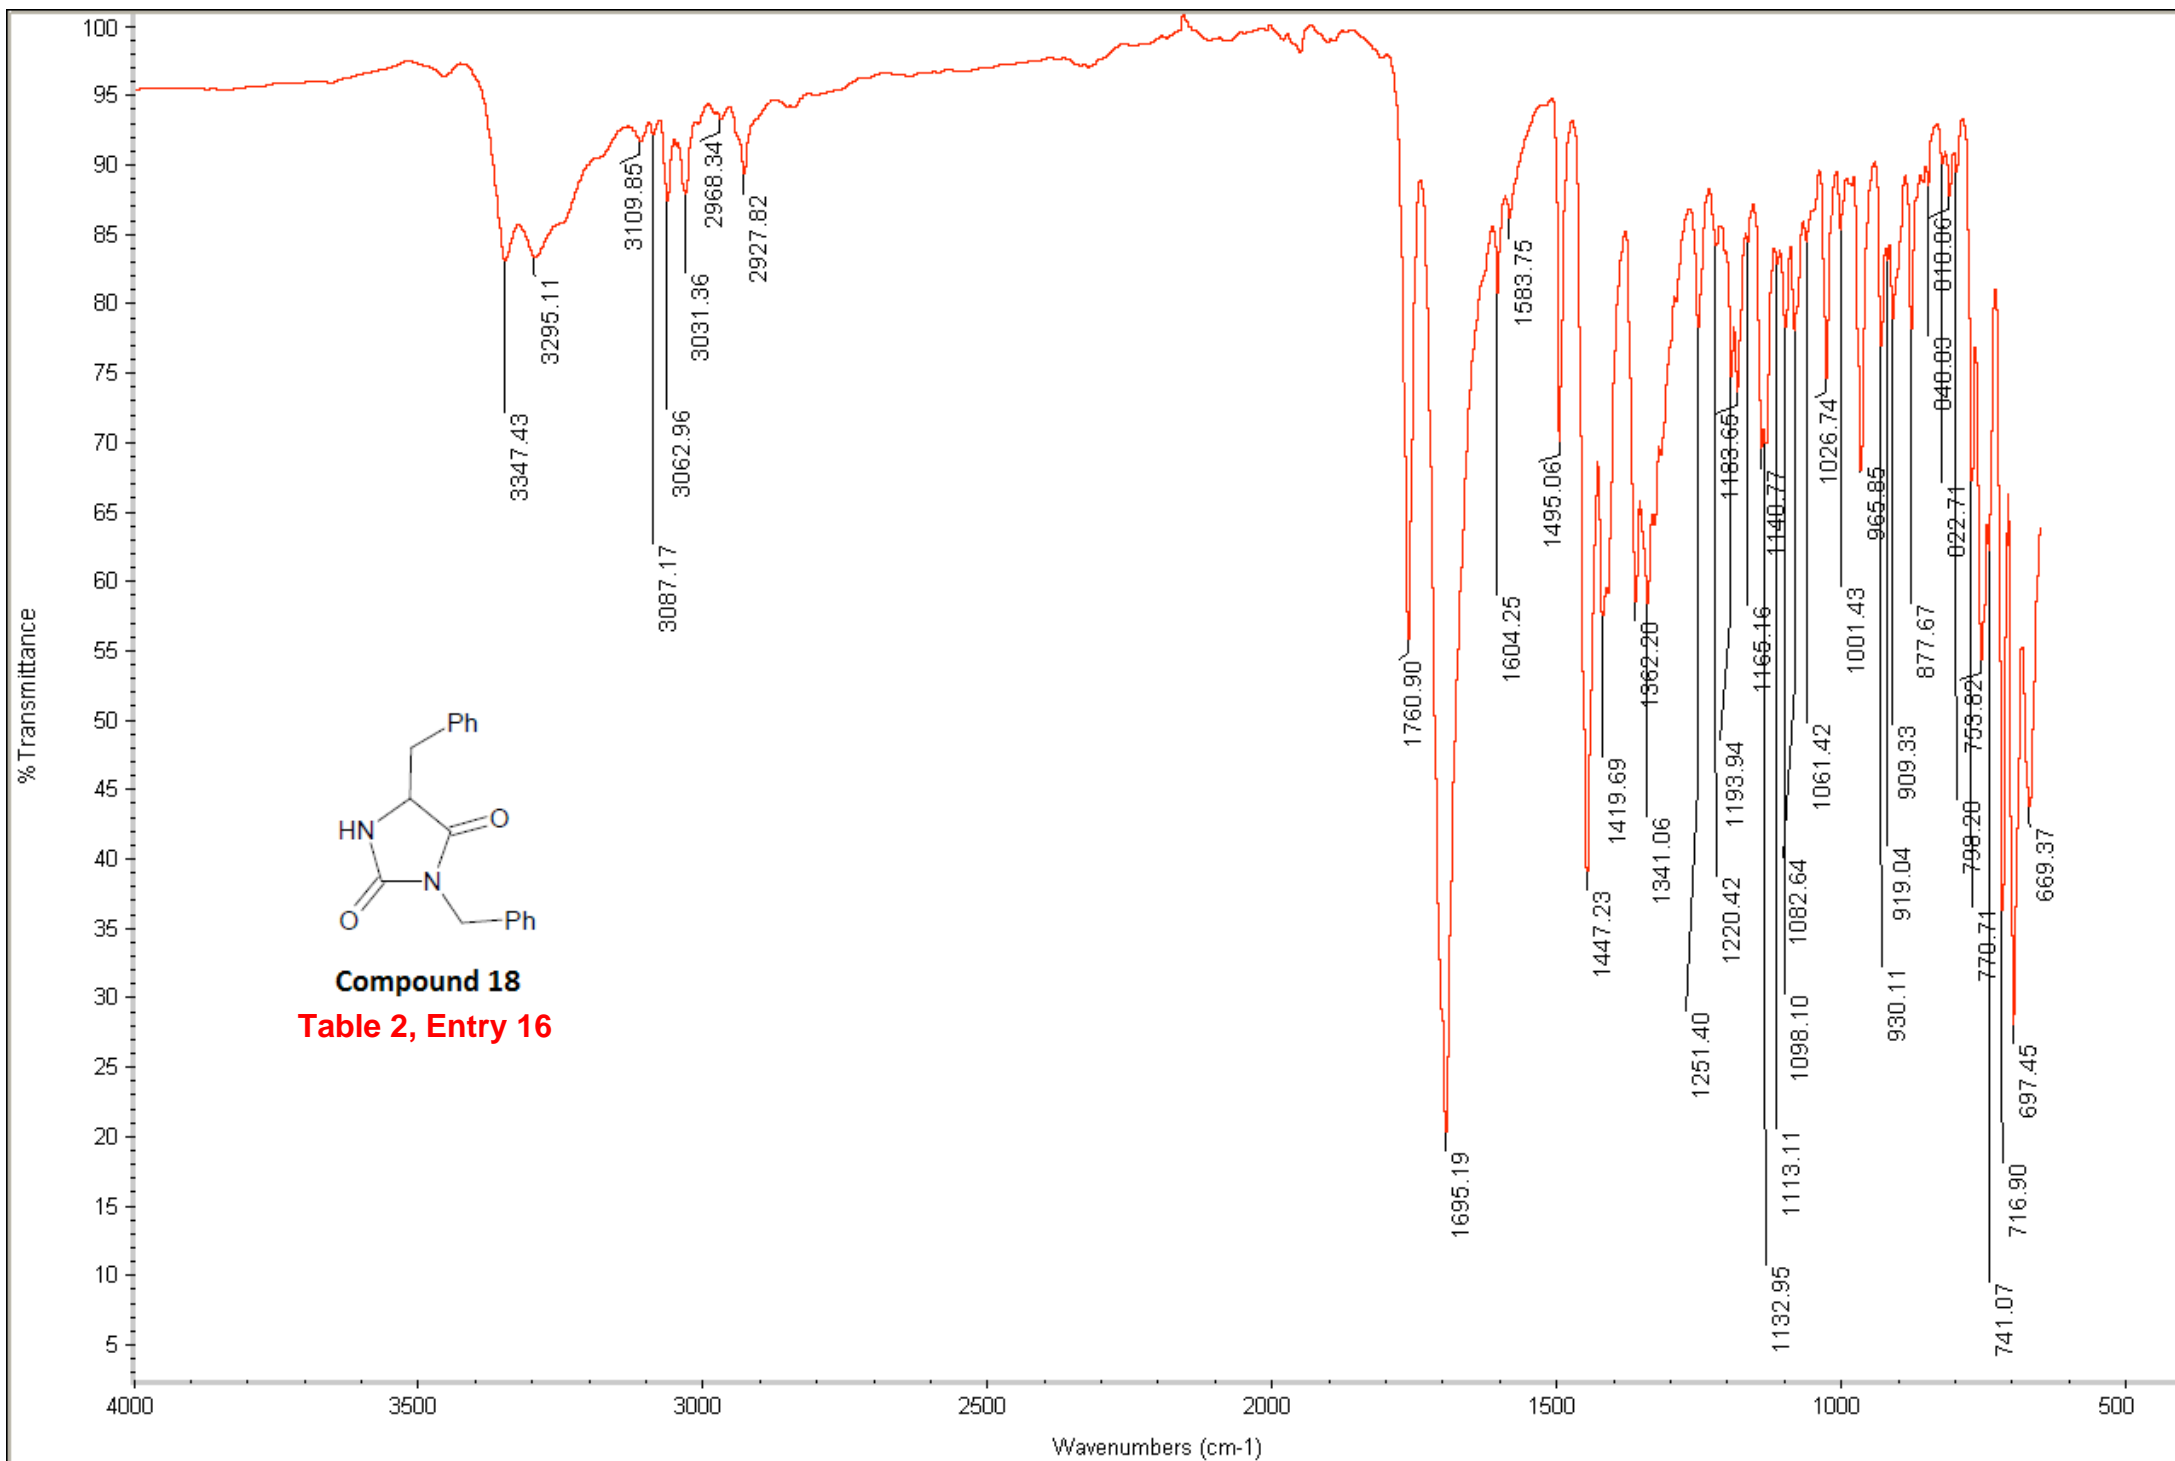

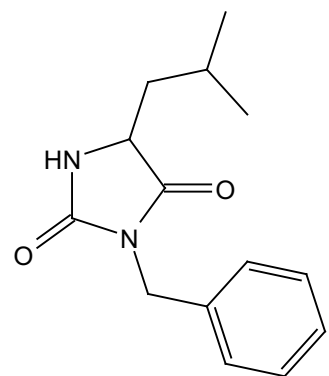

**Compound 19**  
**Table 2, entry 17**

—2524.71  
2199.86  
2192.54  
2185.50  
2175.16  
2168.21  
—1354.65  
1252.29  
1248.17  
1243.05  
1239.29  
1000.34  
750.33  
750.23  
461.42  
457.03  
452.36  
432.24  
427.11  
423.00  
417.97  
267.48  
265.47  
260.98  
258.88

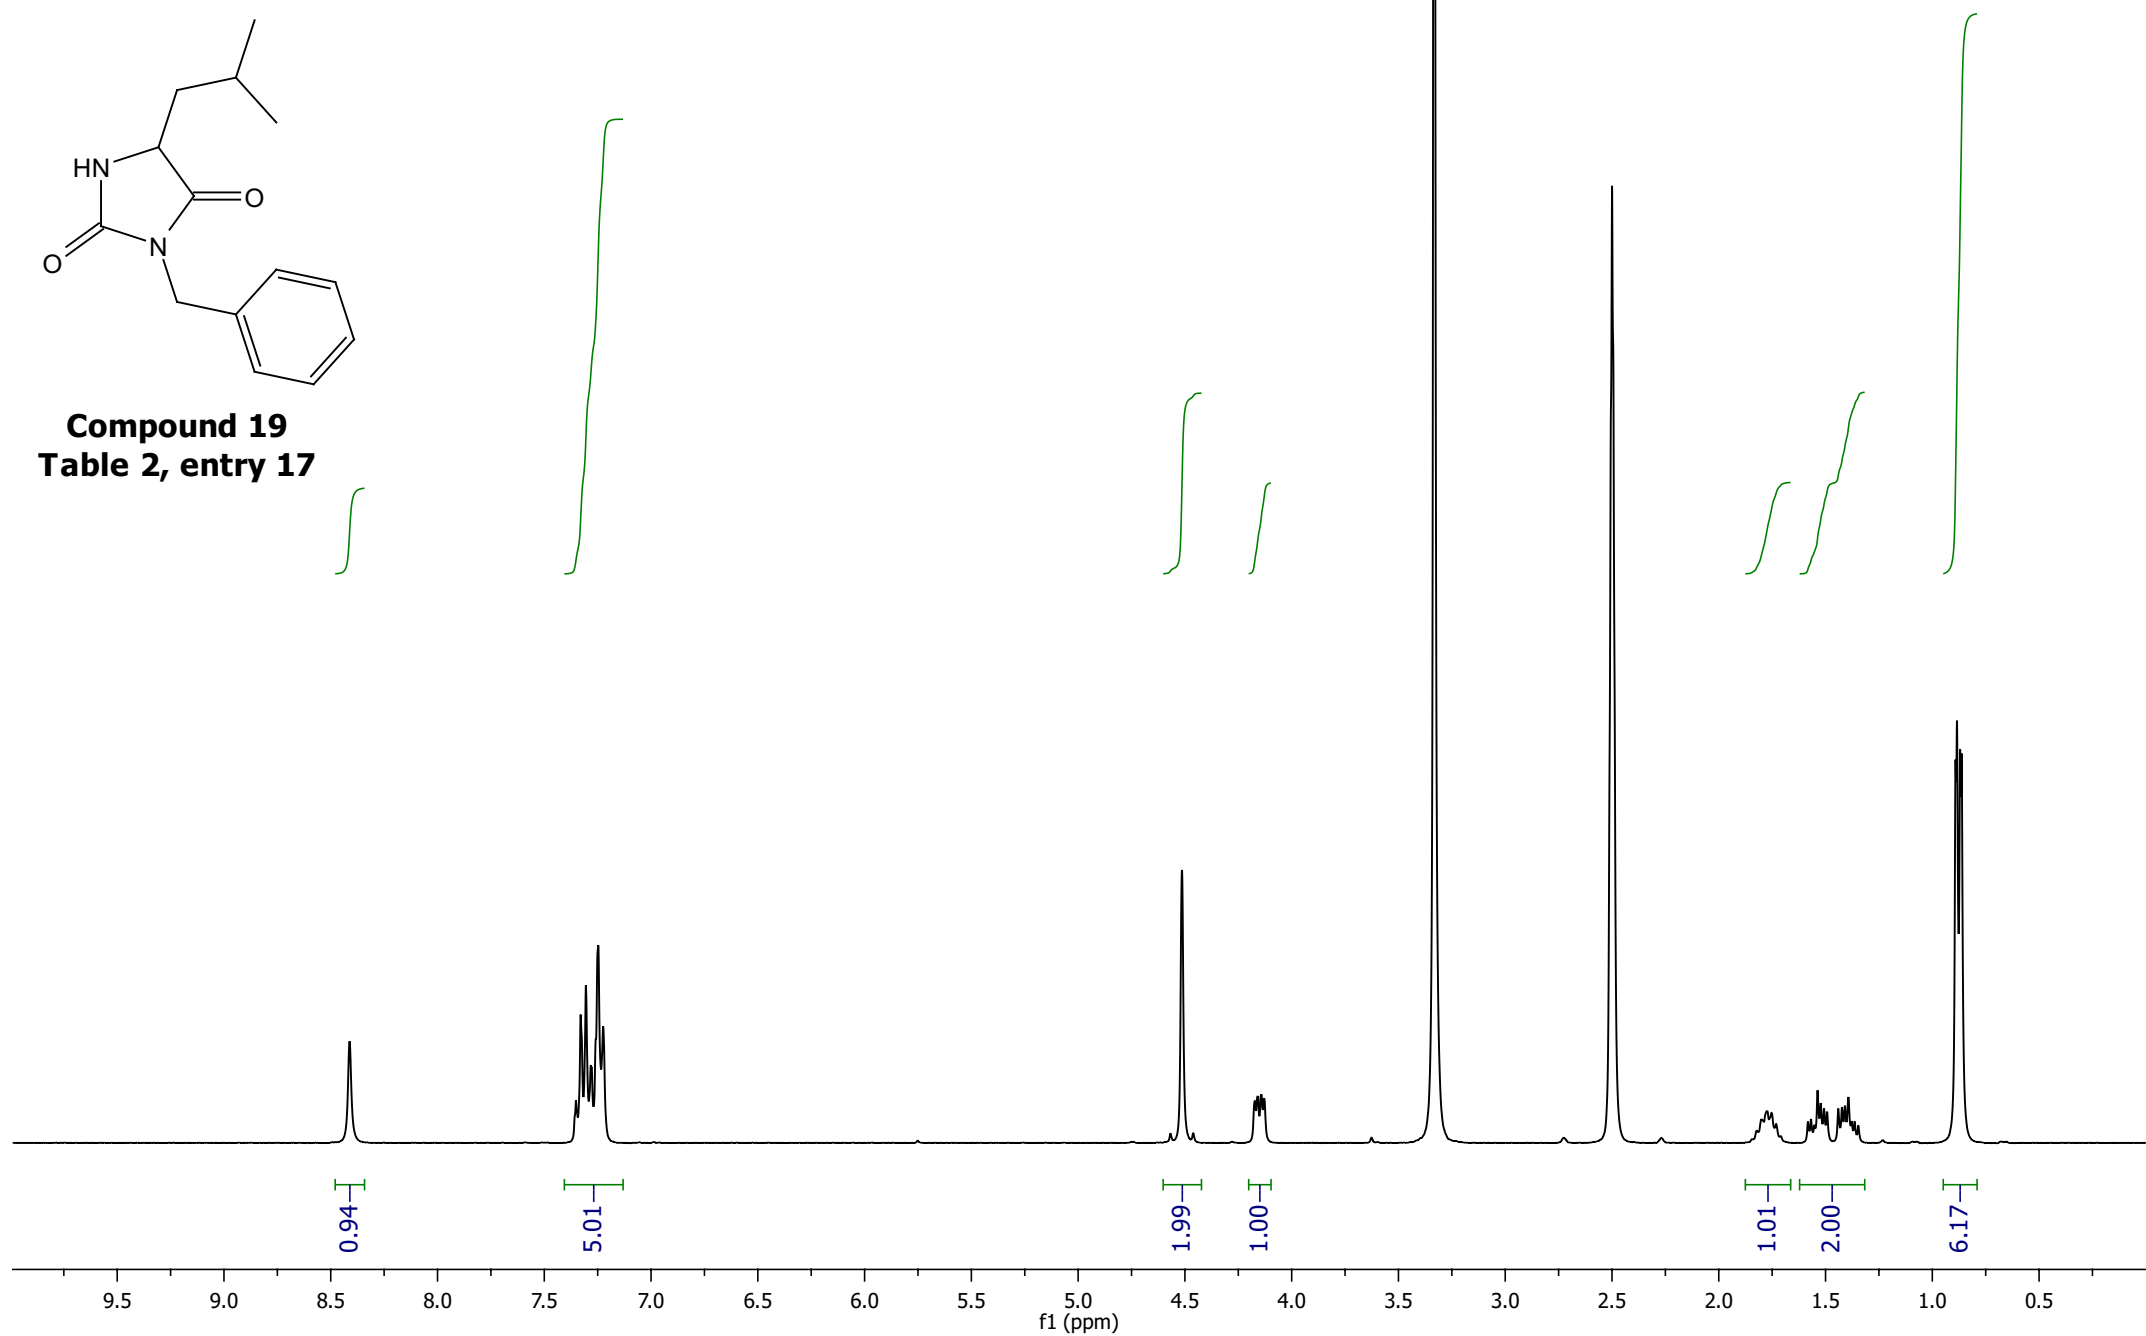

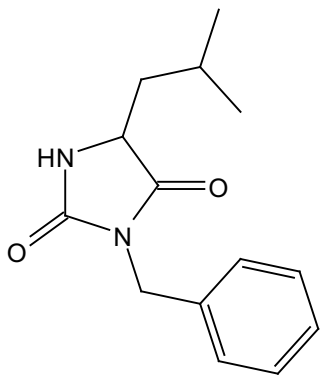

**Compound 19**  
**Table 2, entry 17**

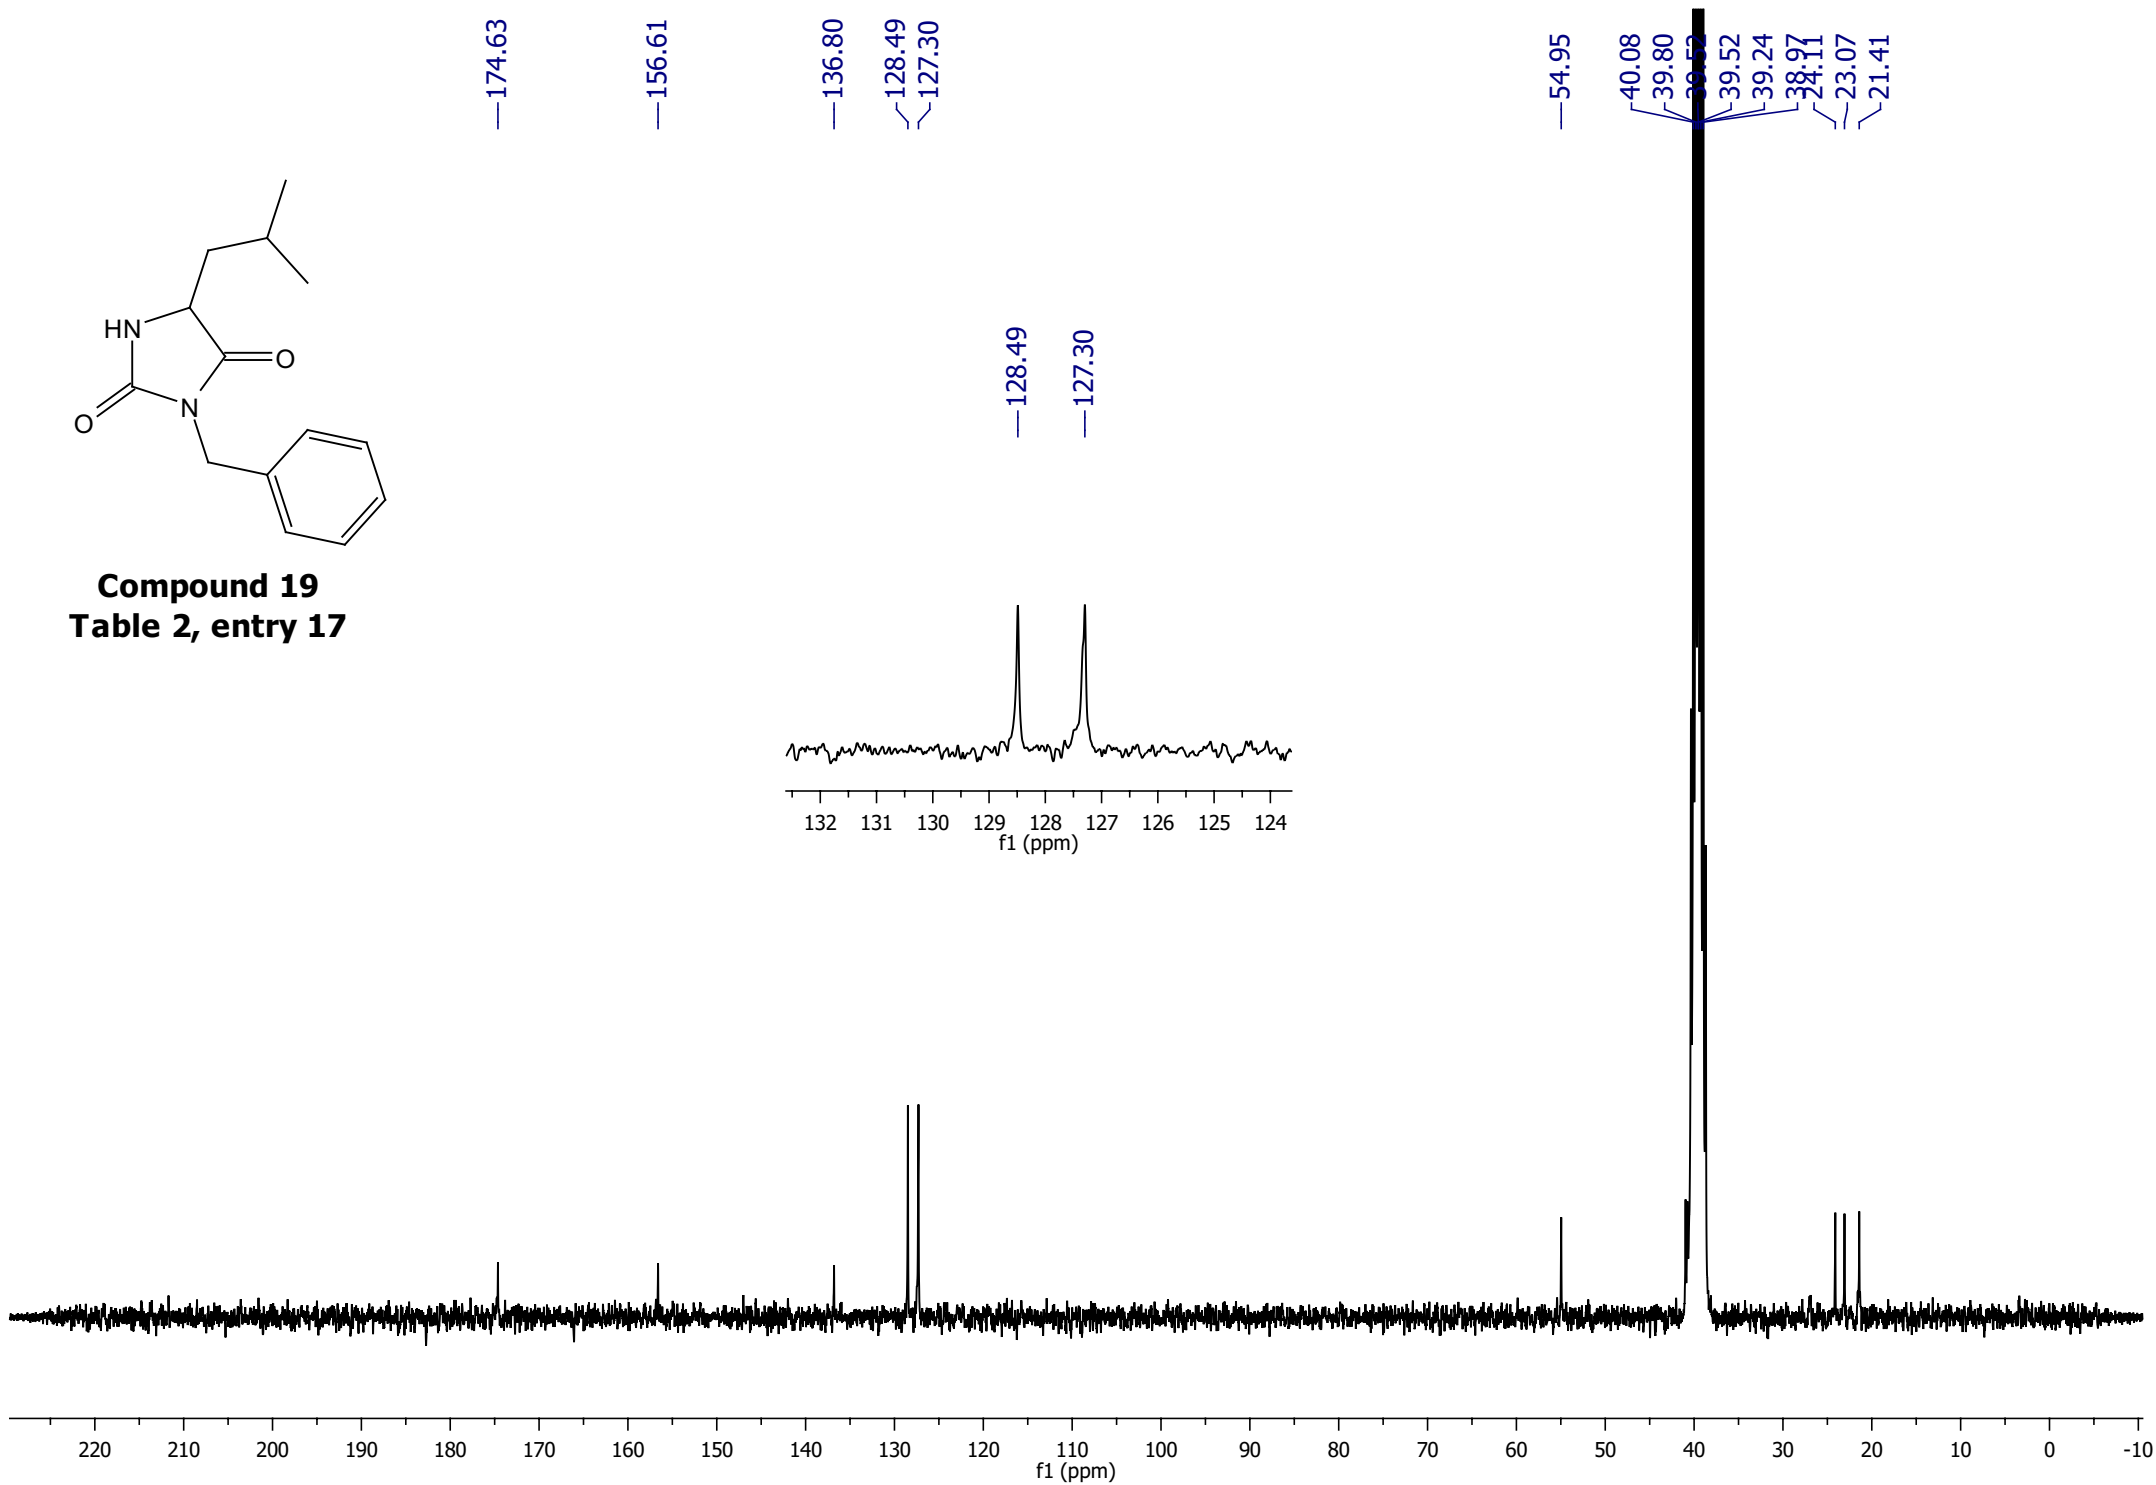

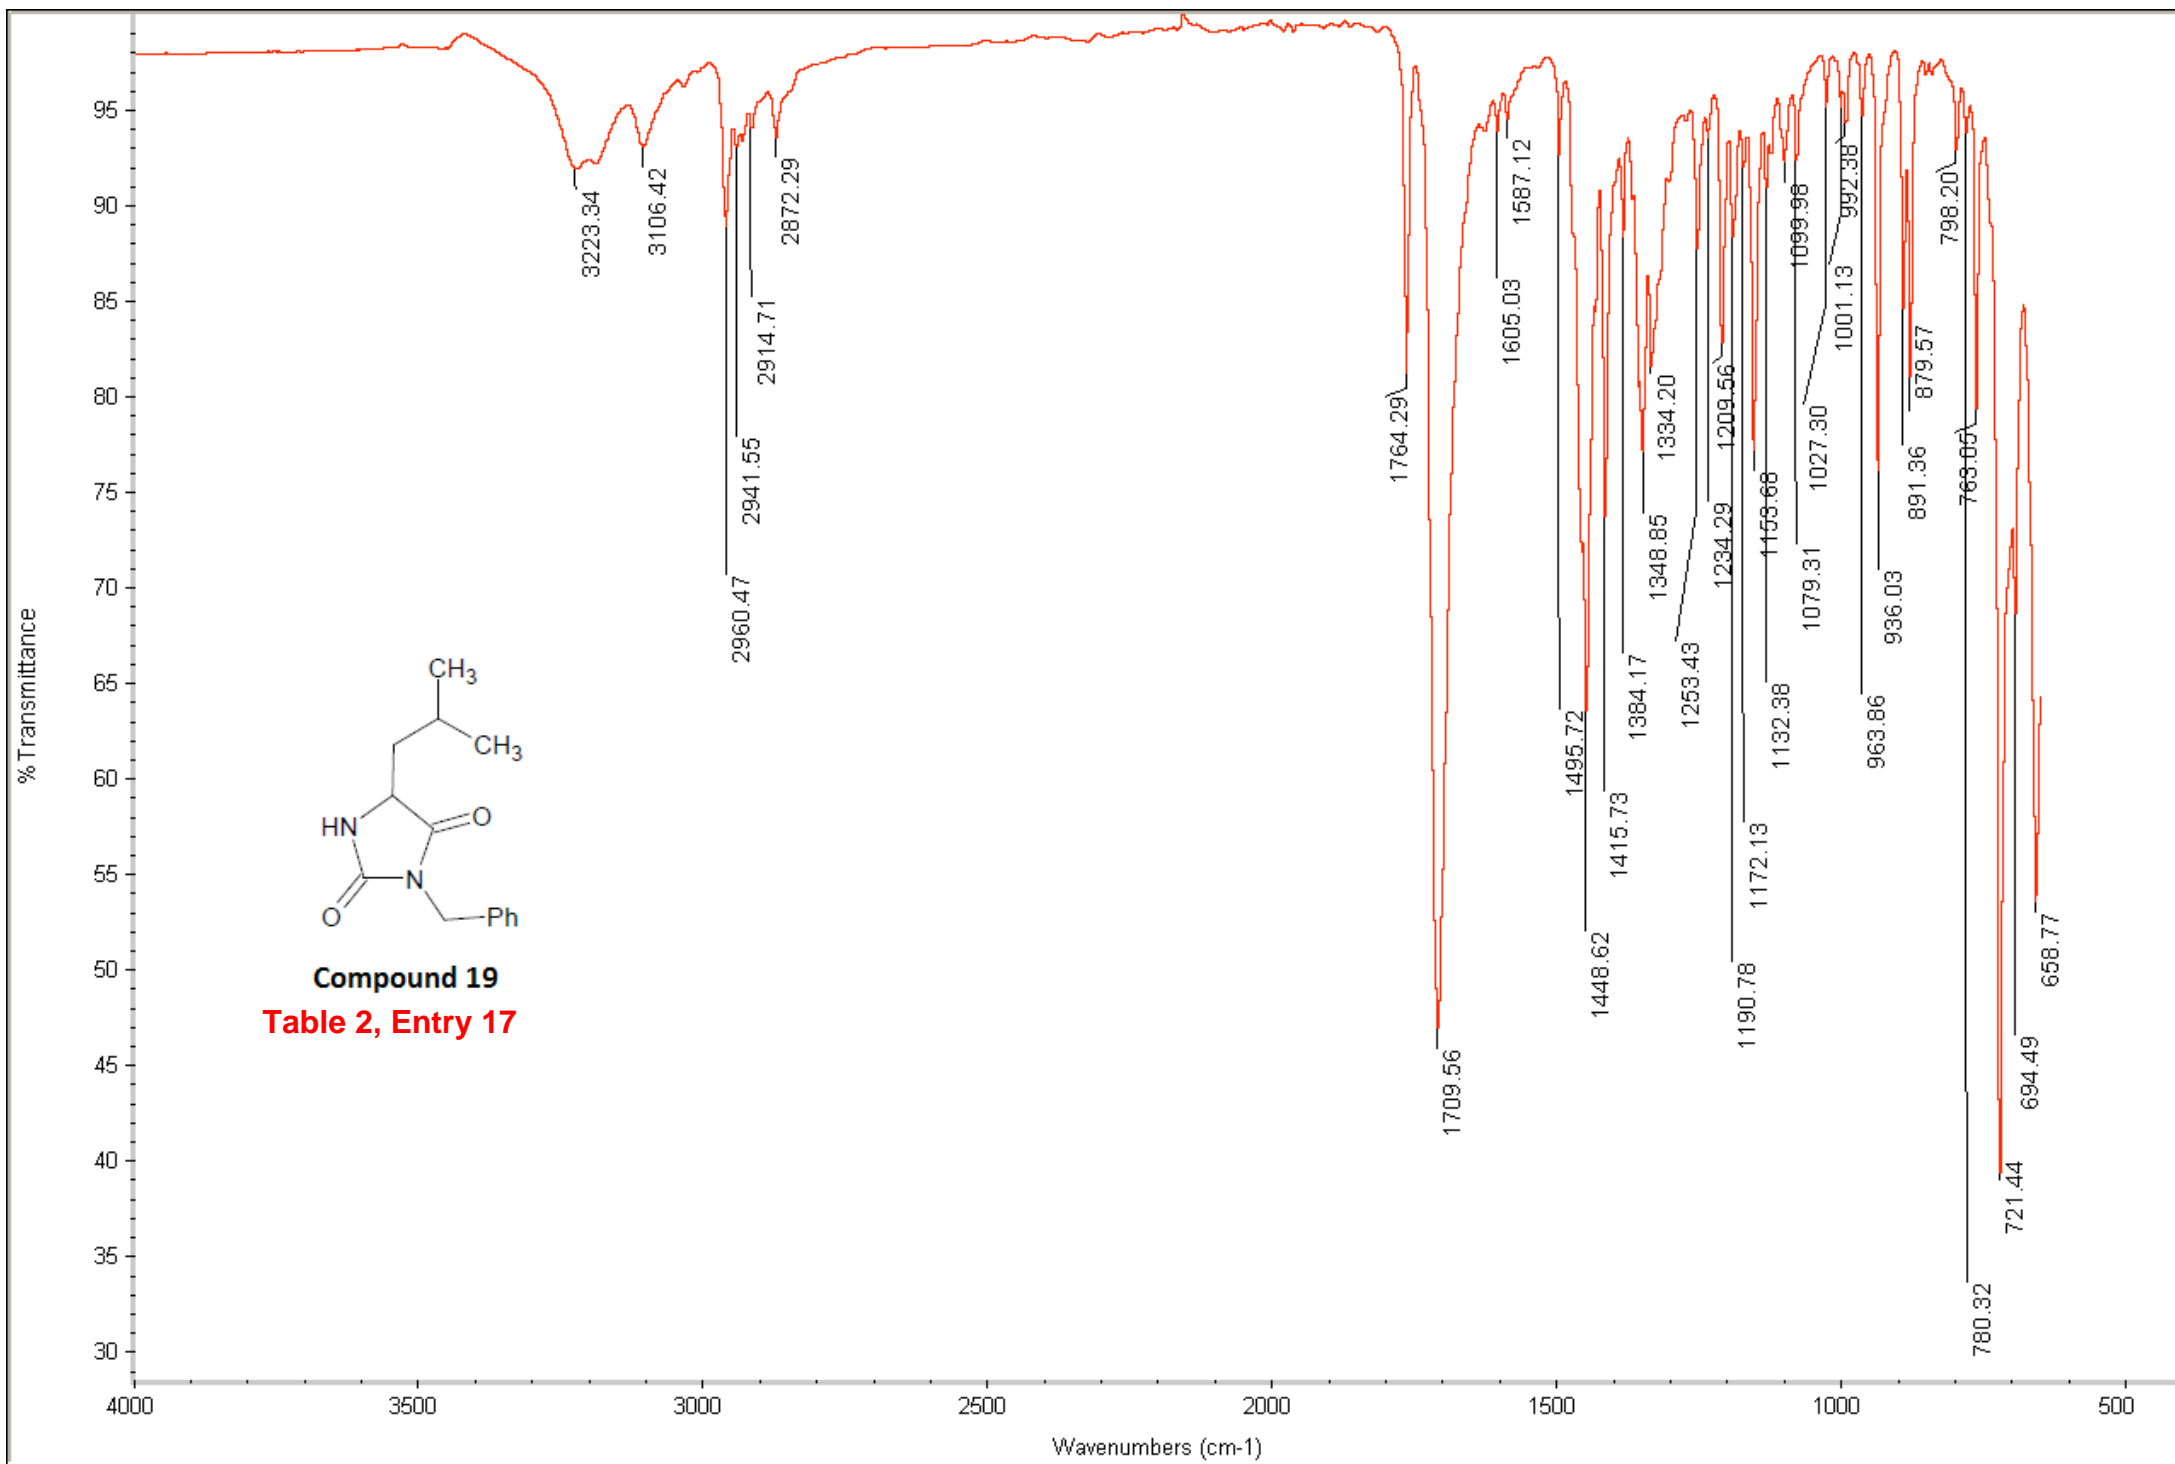



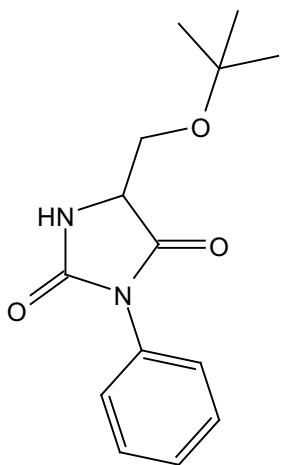

**Compound 21**  
**Table 2, entry 19**

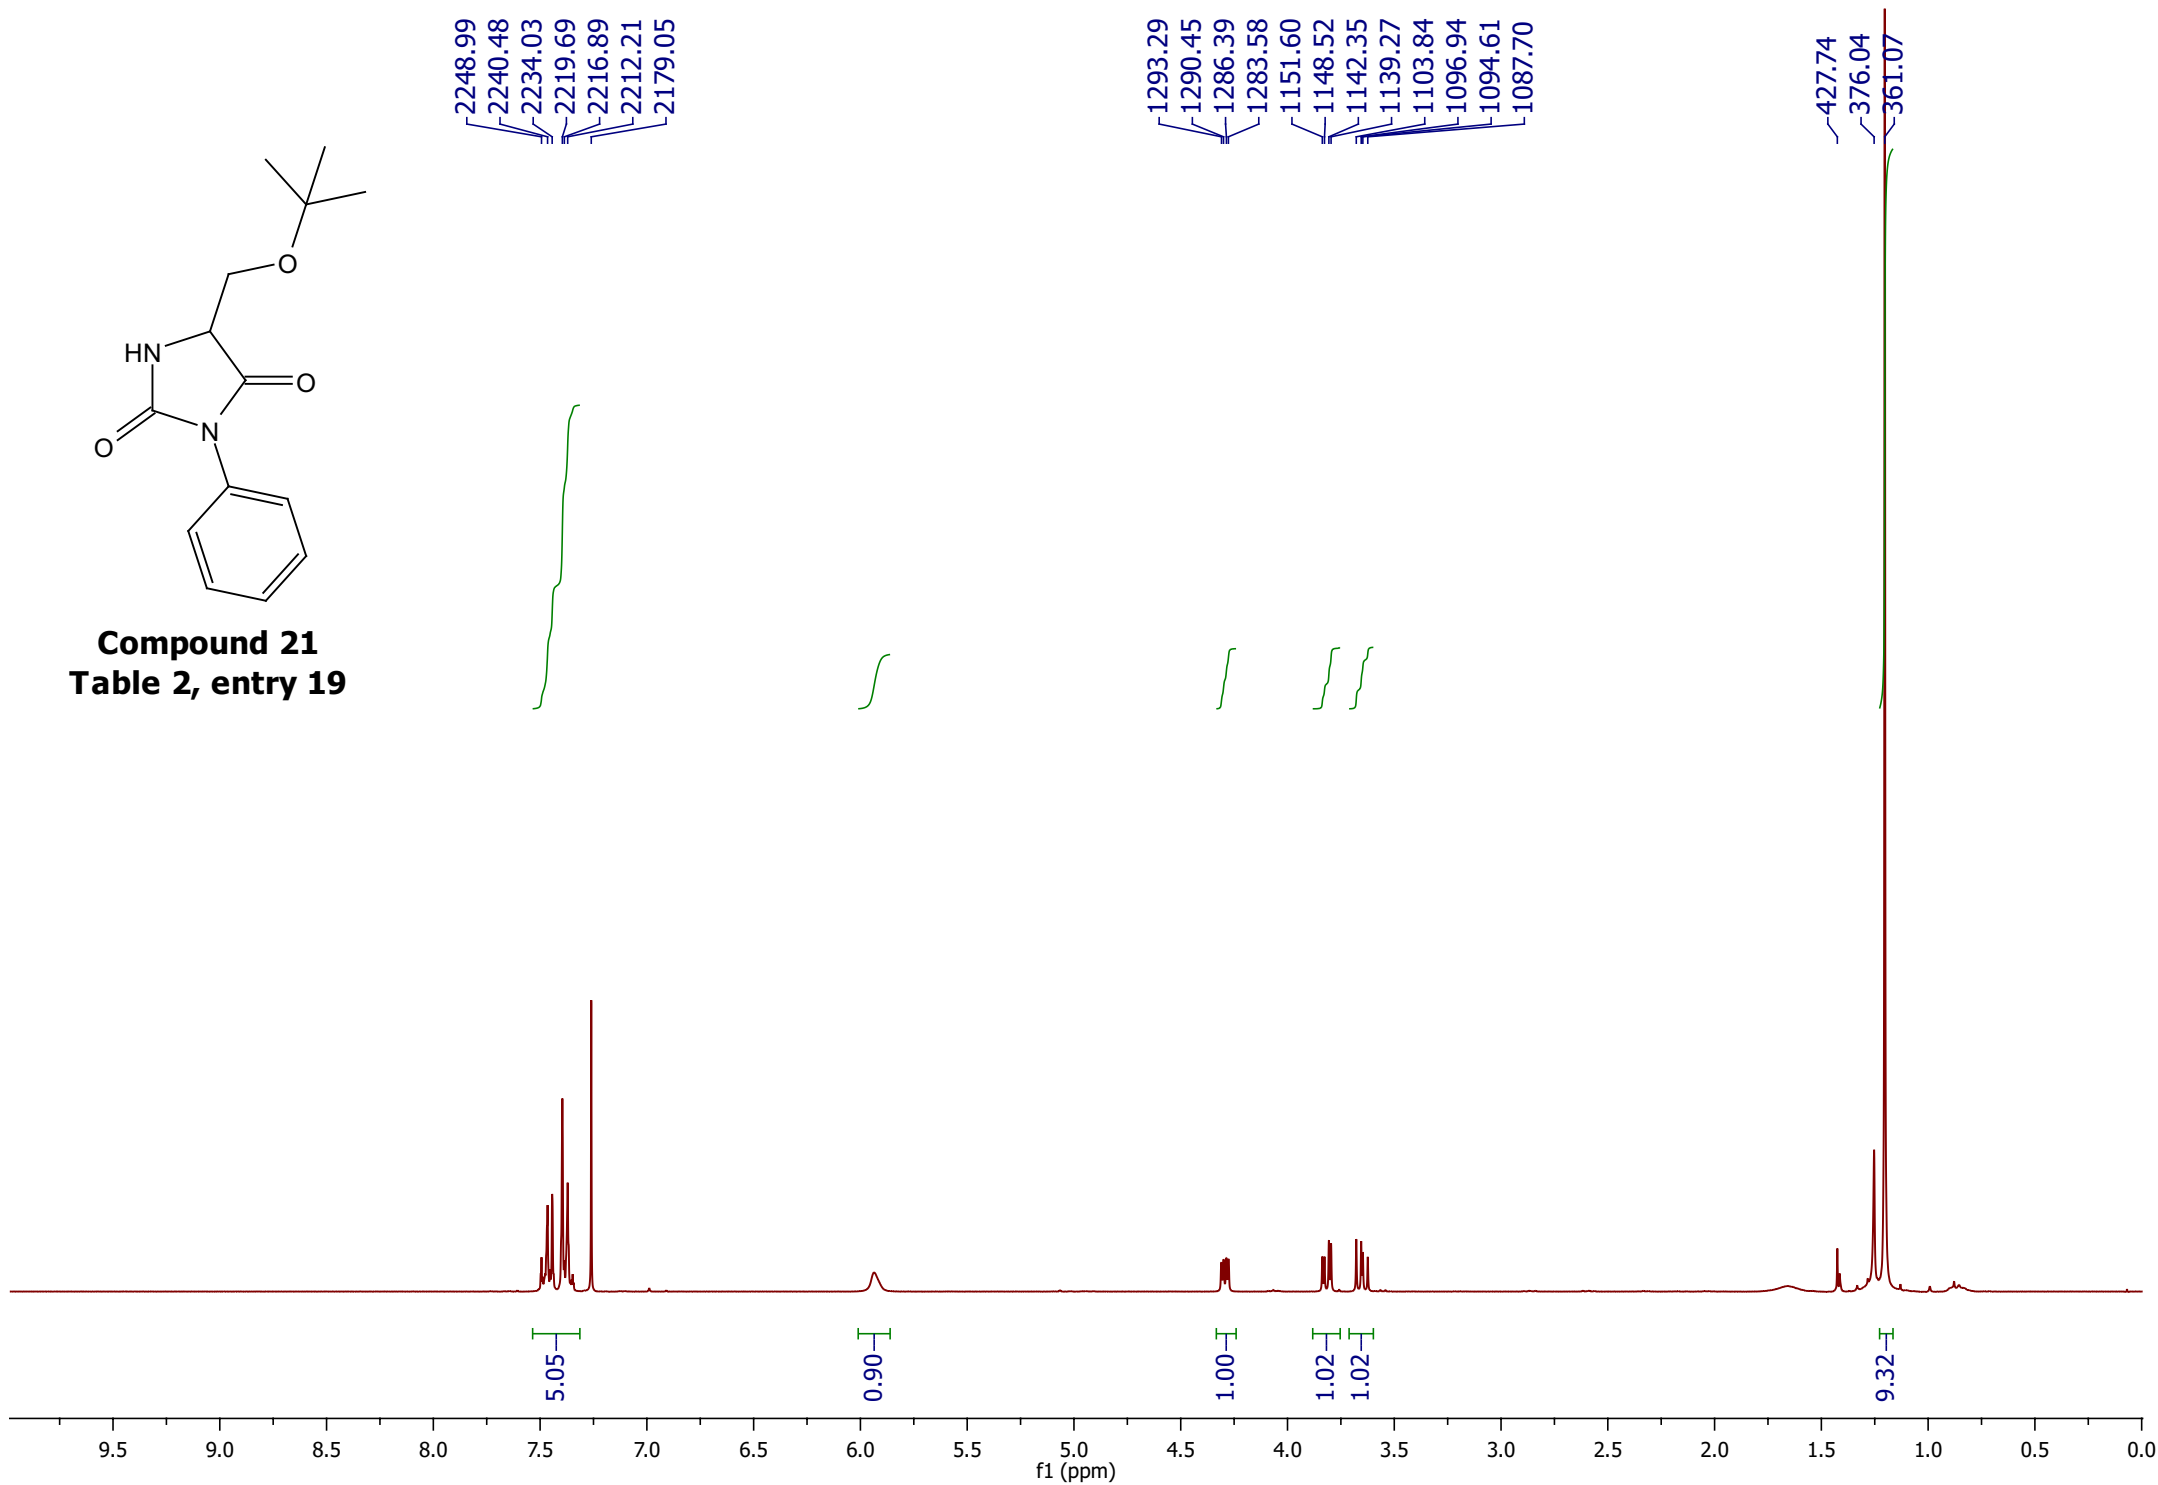

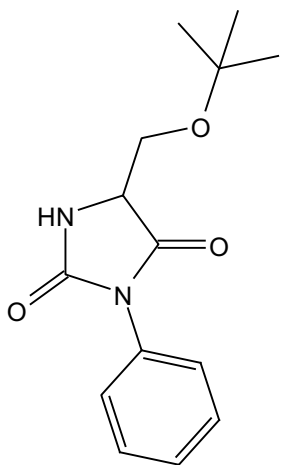

**Compound 21**  
**Table 2, entry 19**

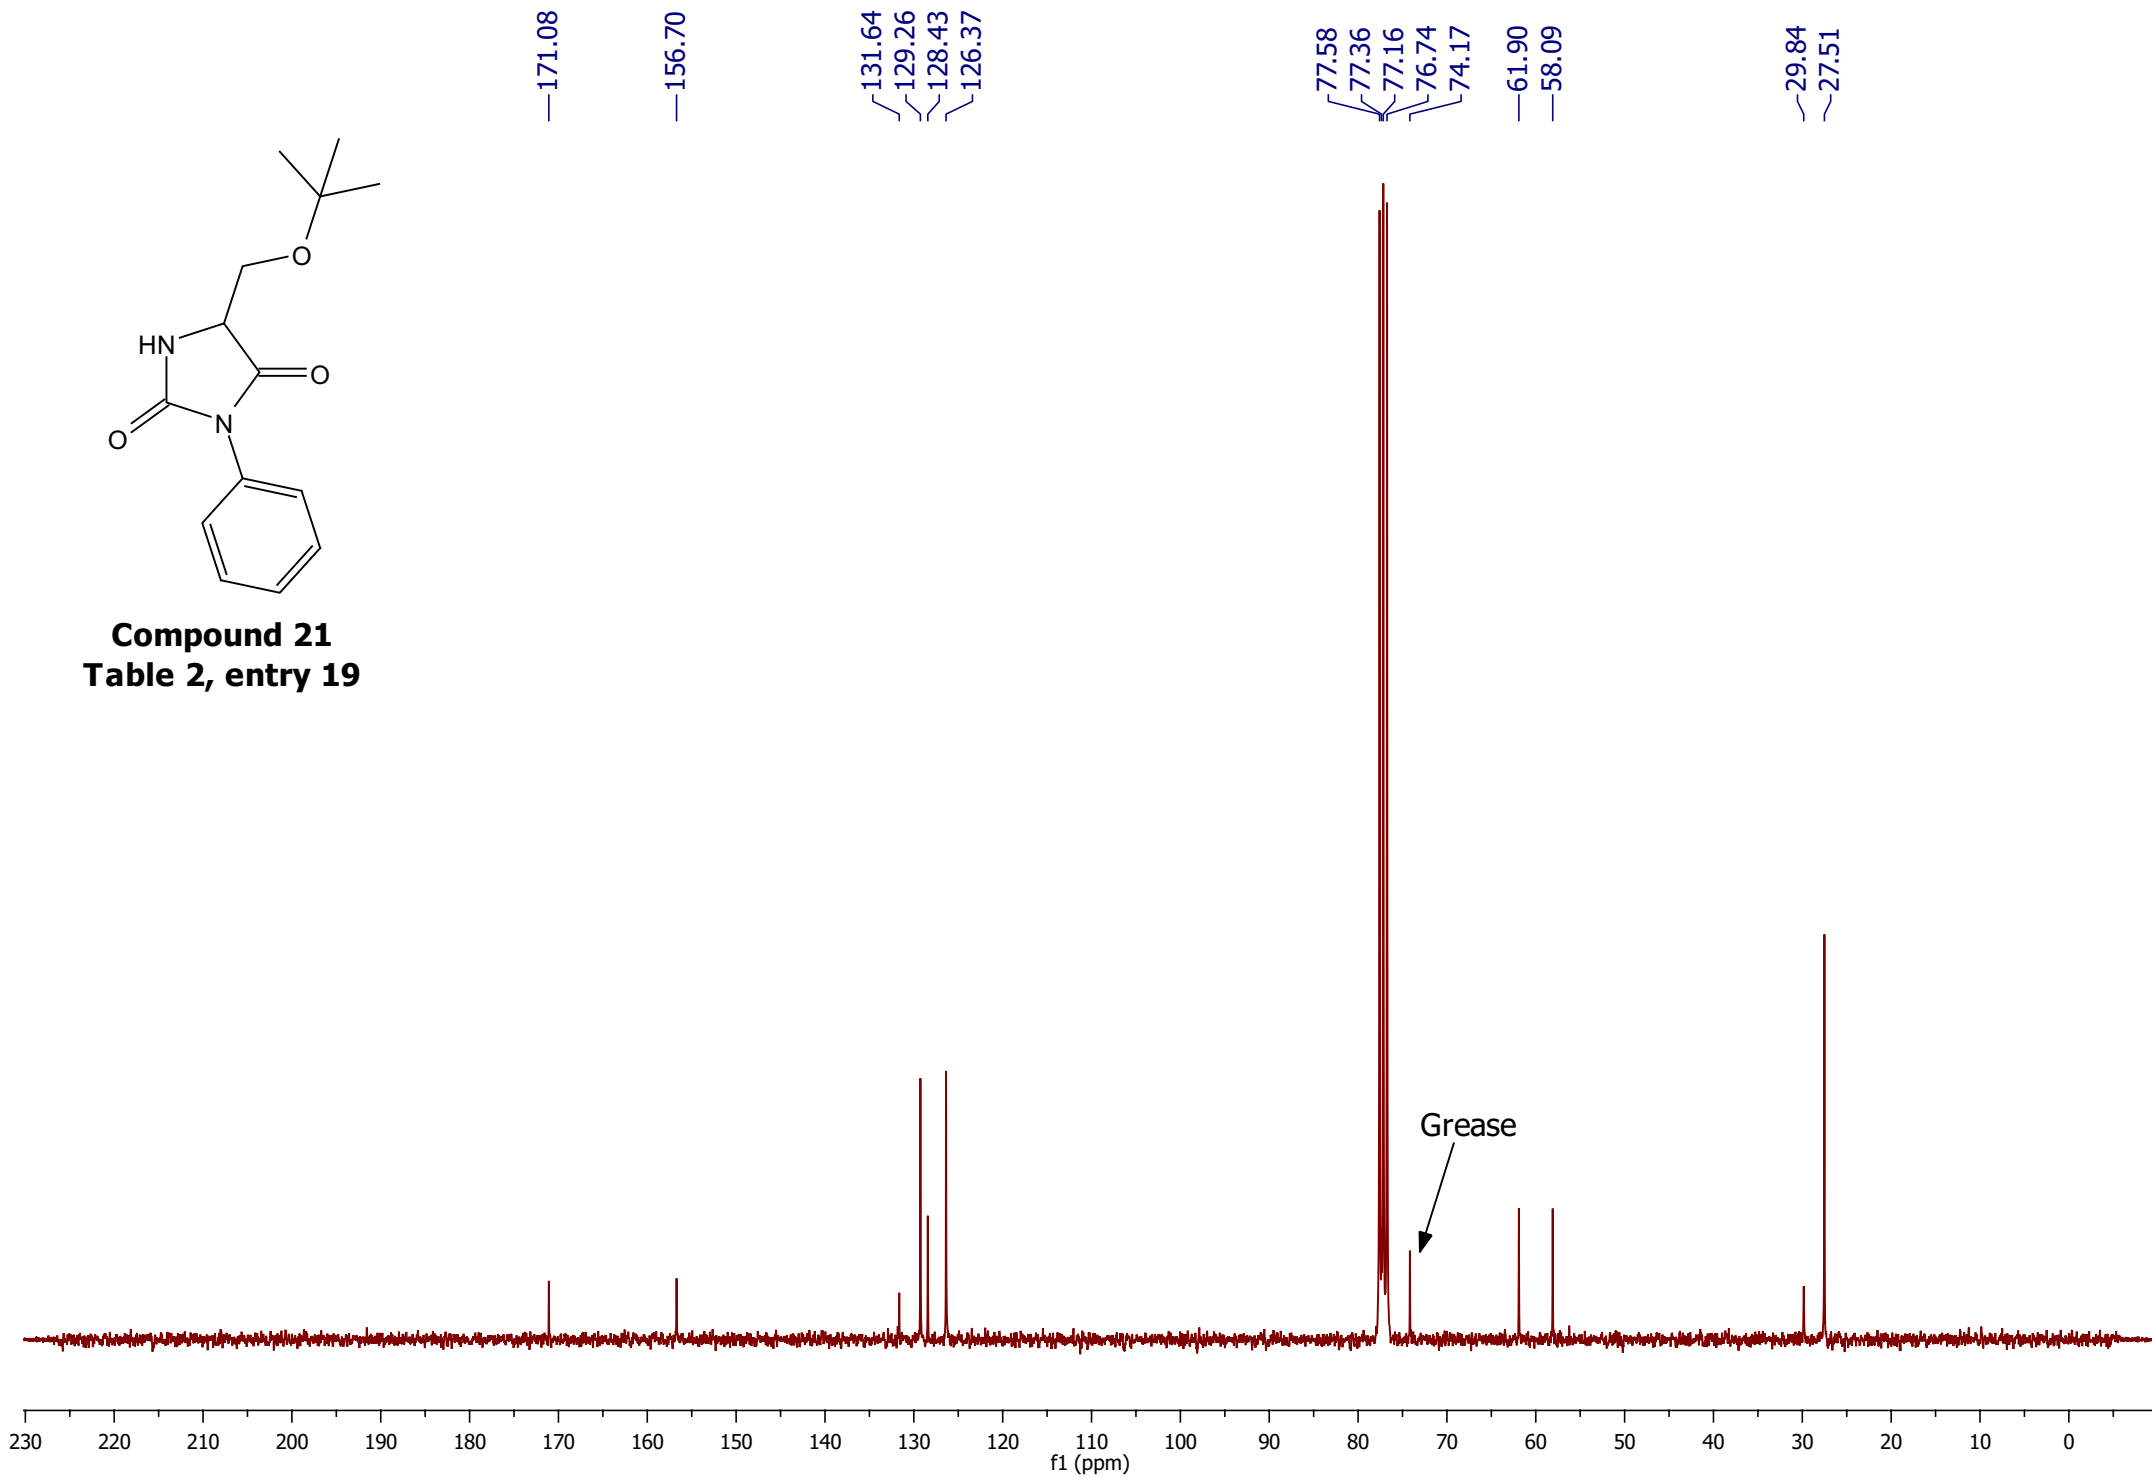

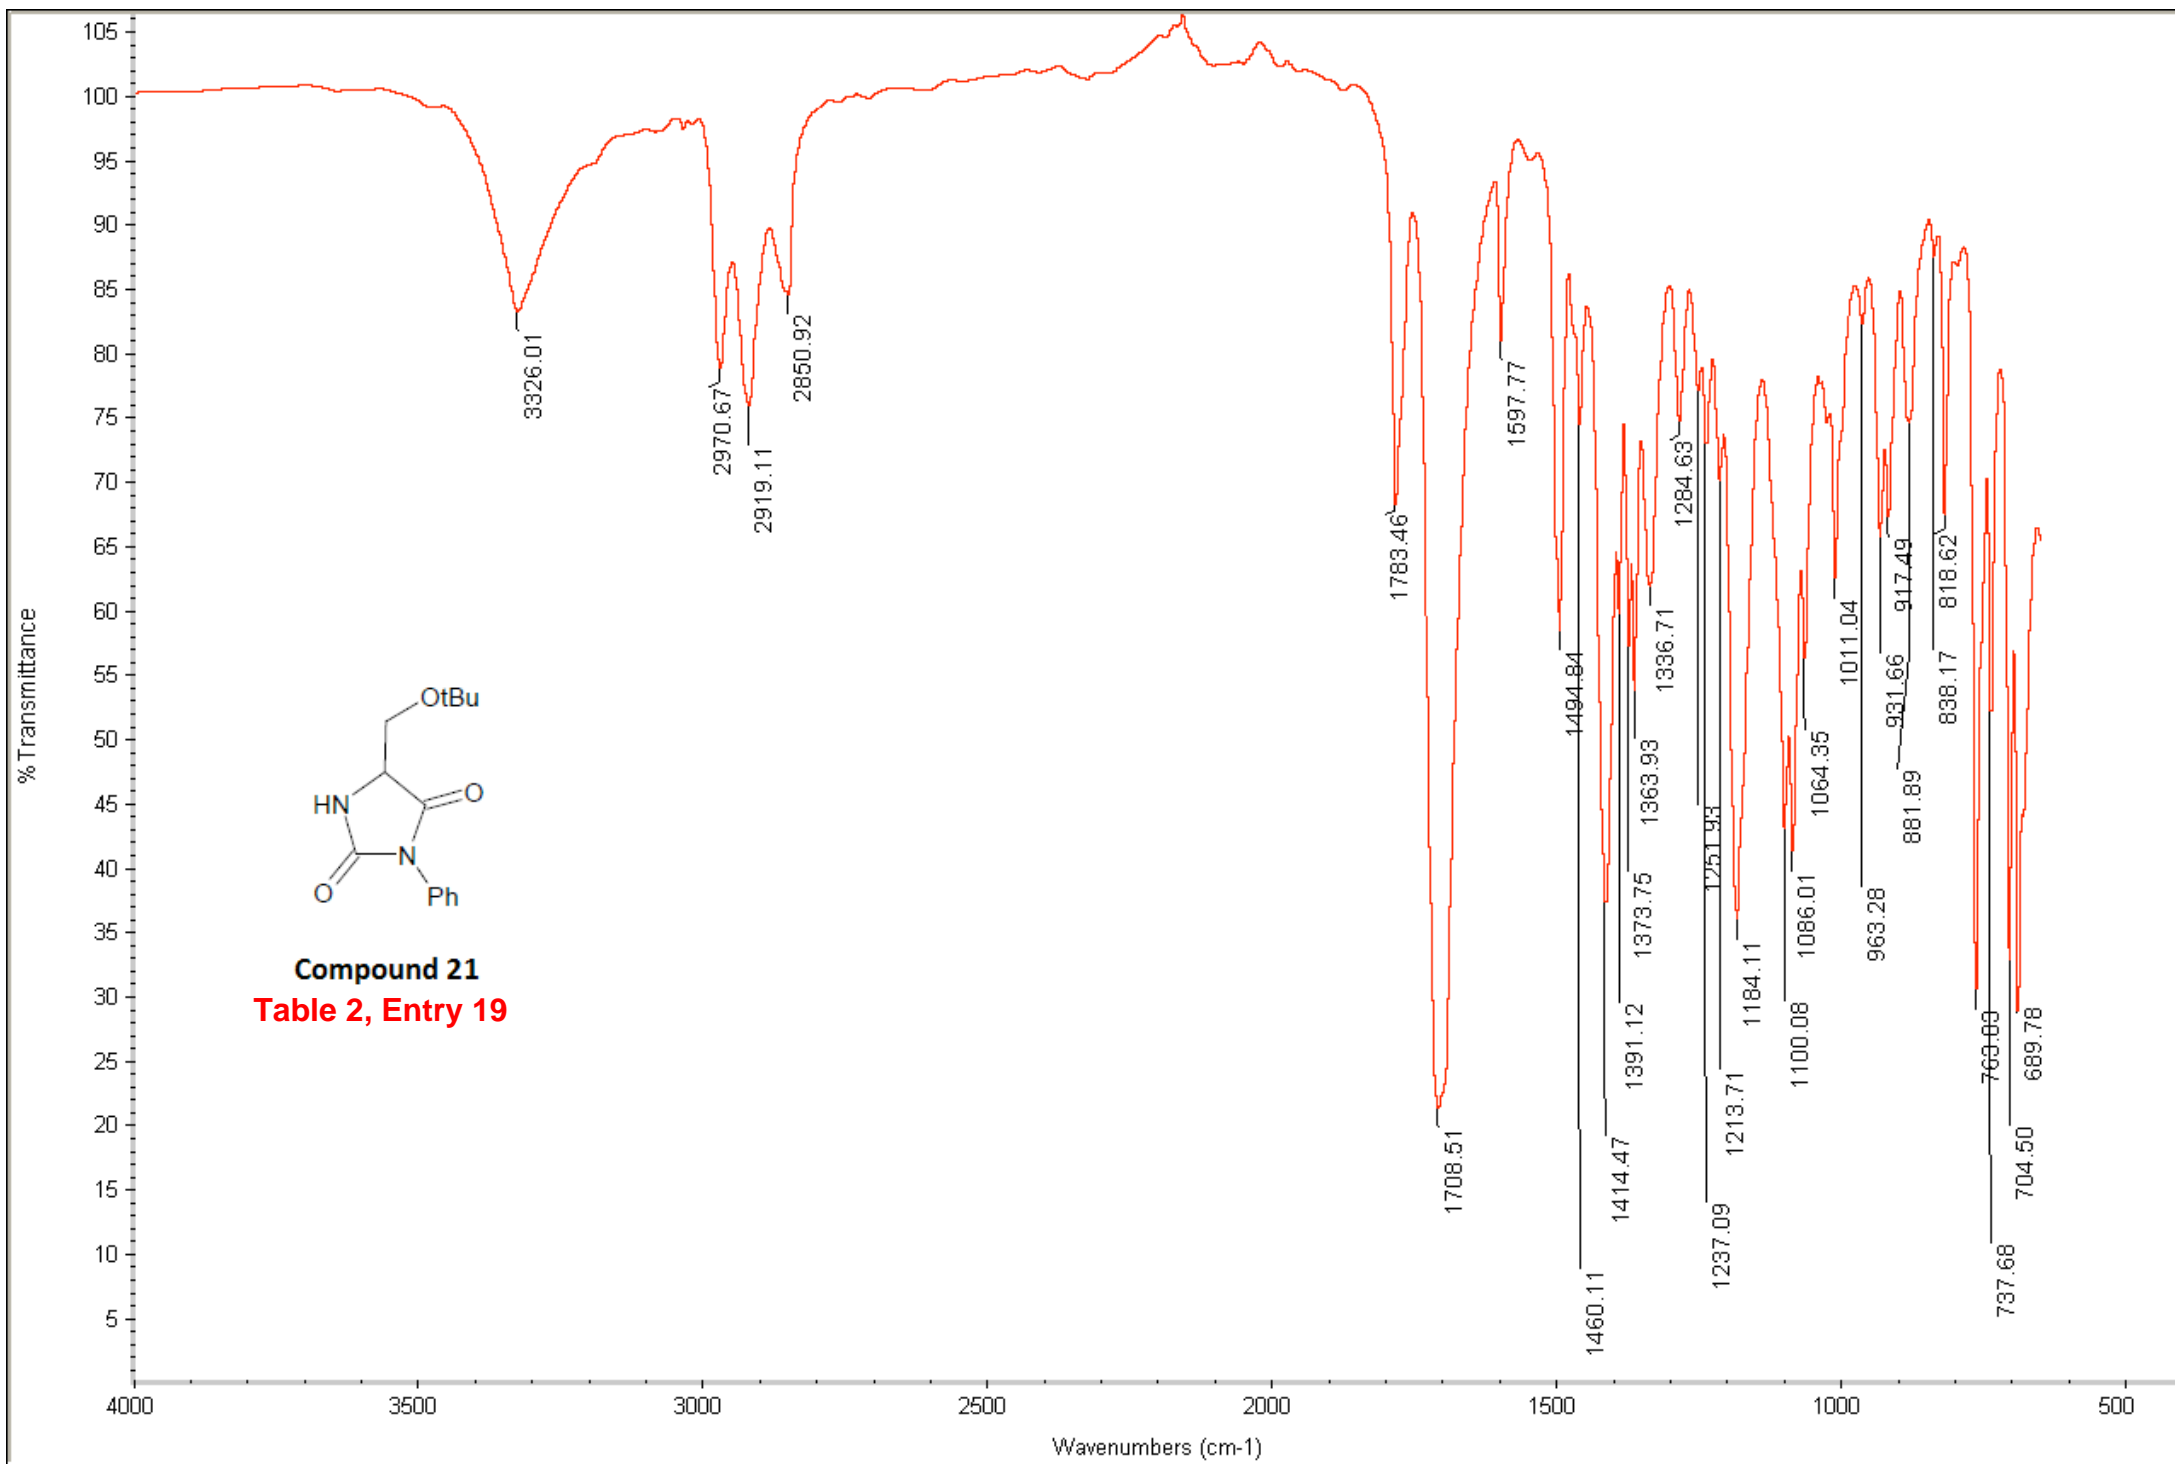

2148.85  
2089.74  
2081.39  
2071.50  
2067.51  
2064.58  
2062.87  
2059.00  
2034.85  
2026.87  
2021.48  
1932.08  
1441.57  
1212.76  
1208.56  
1206.90  
1202.59  
1199.83  
1192.64  
1093.42  
1090.10  
1085.86  
1081.62  
1077.80  
1073.97  
1069.34  
1065.51  
1059.39  
897.41  
893.45  
883.40  
879.49  
874.06  
867.97  
853.87  
847.53  
839.87  
833.49  
573.44  
569.78  
560.43  
557.35  
548.14  
544.94  
535.83  
532.57  
493.80  
482.18  
448.71  
440.06  
394.47  
388.94  
378.99  
376.01  
374.07  
355.86  
353.83  
348.34  
344.95  
337.82  
330.62  
323.97  
319.82  
312.46

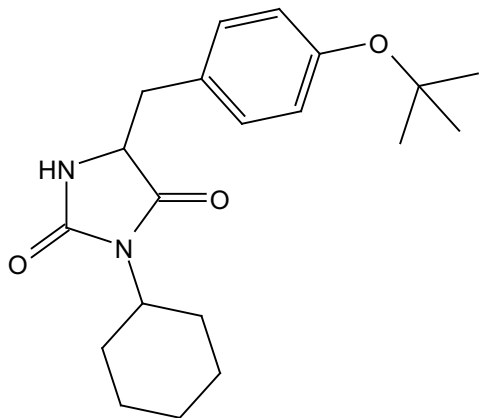

**Compound 24**  
**Table 2, entry 22**

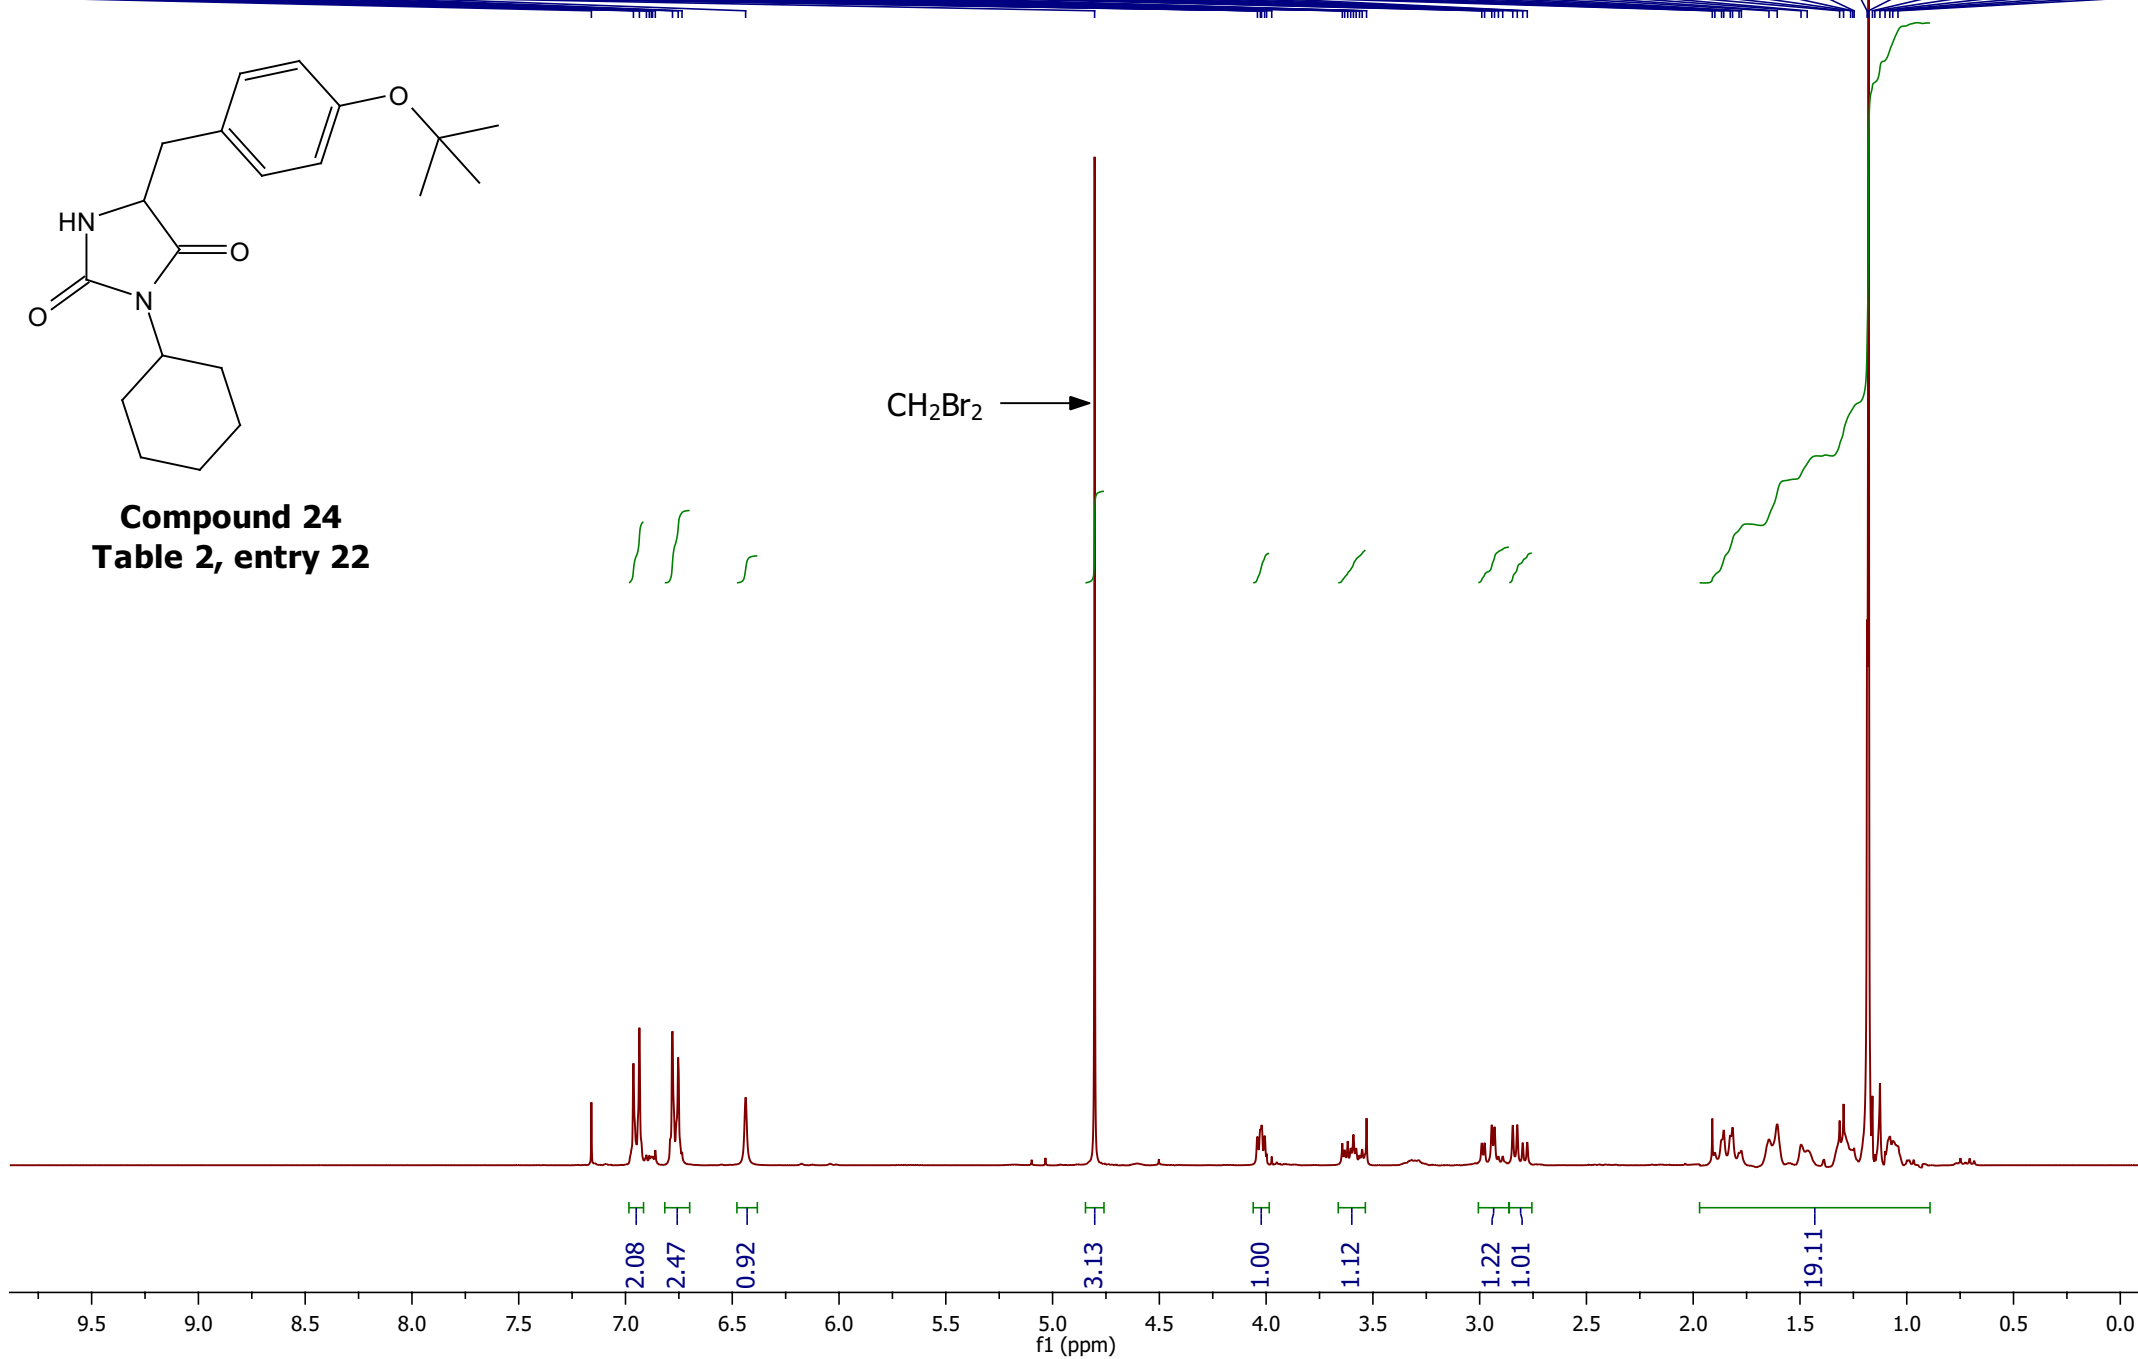

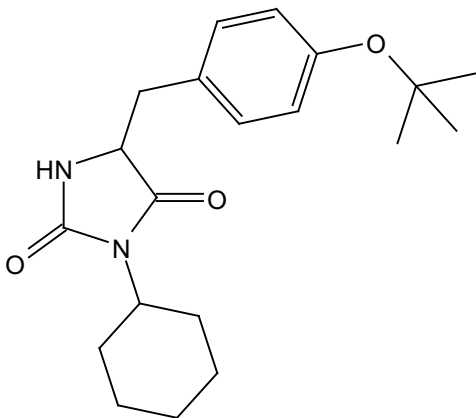

**Compound 24**  
**Table 2, entry 22**

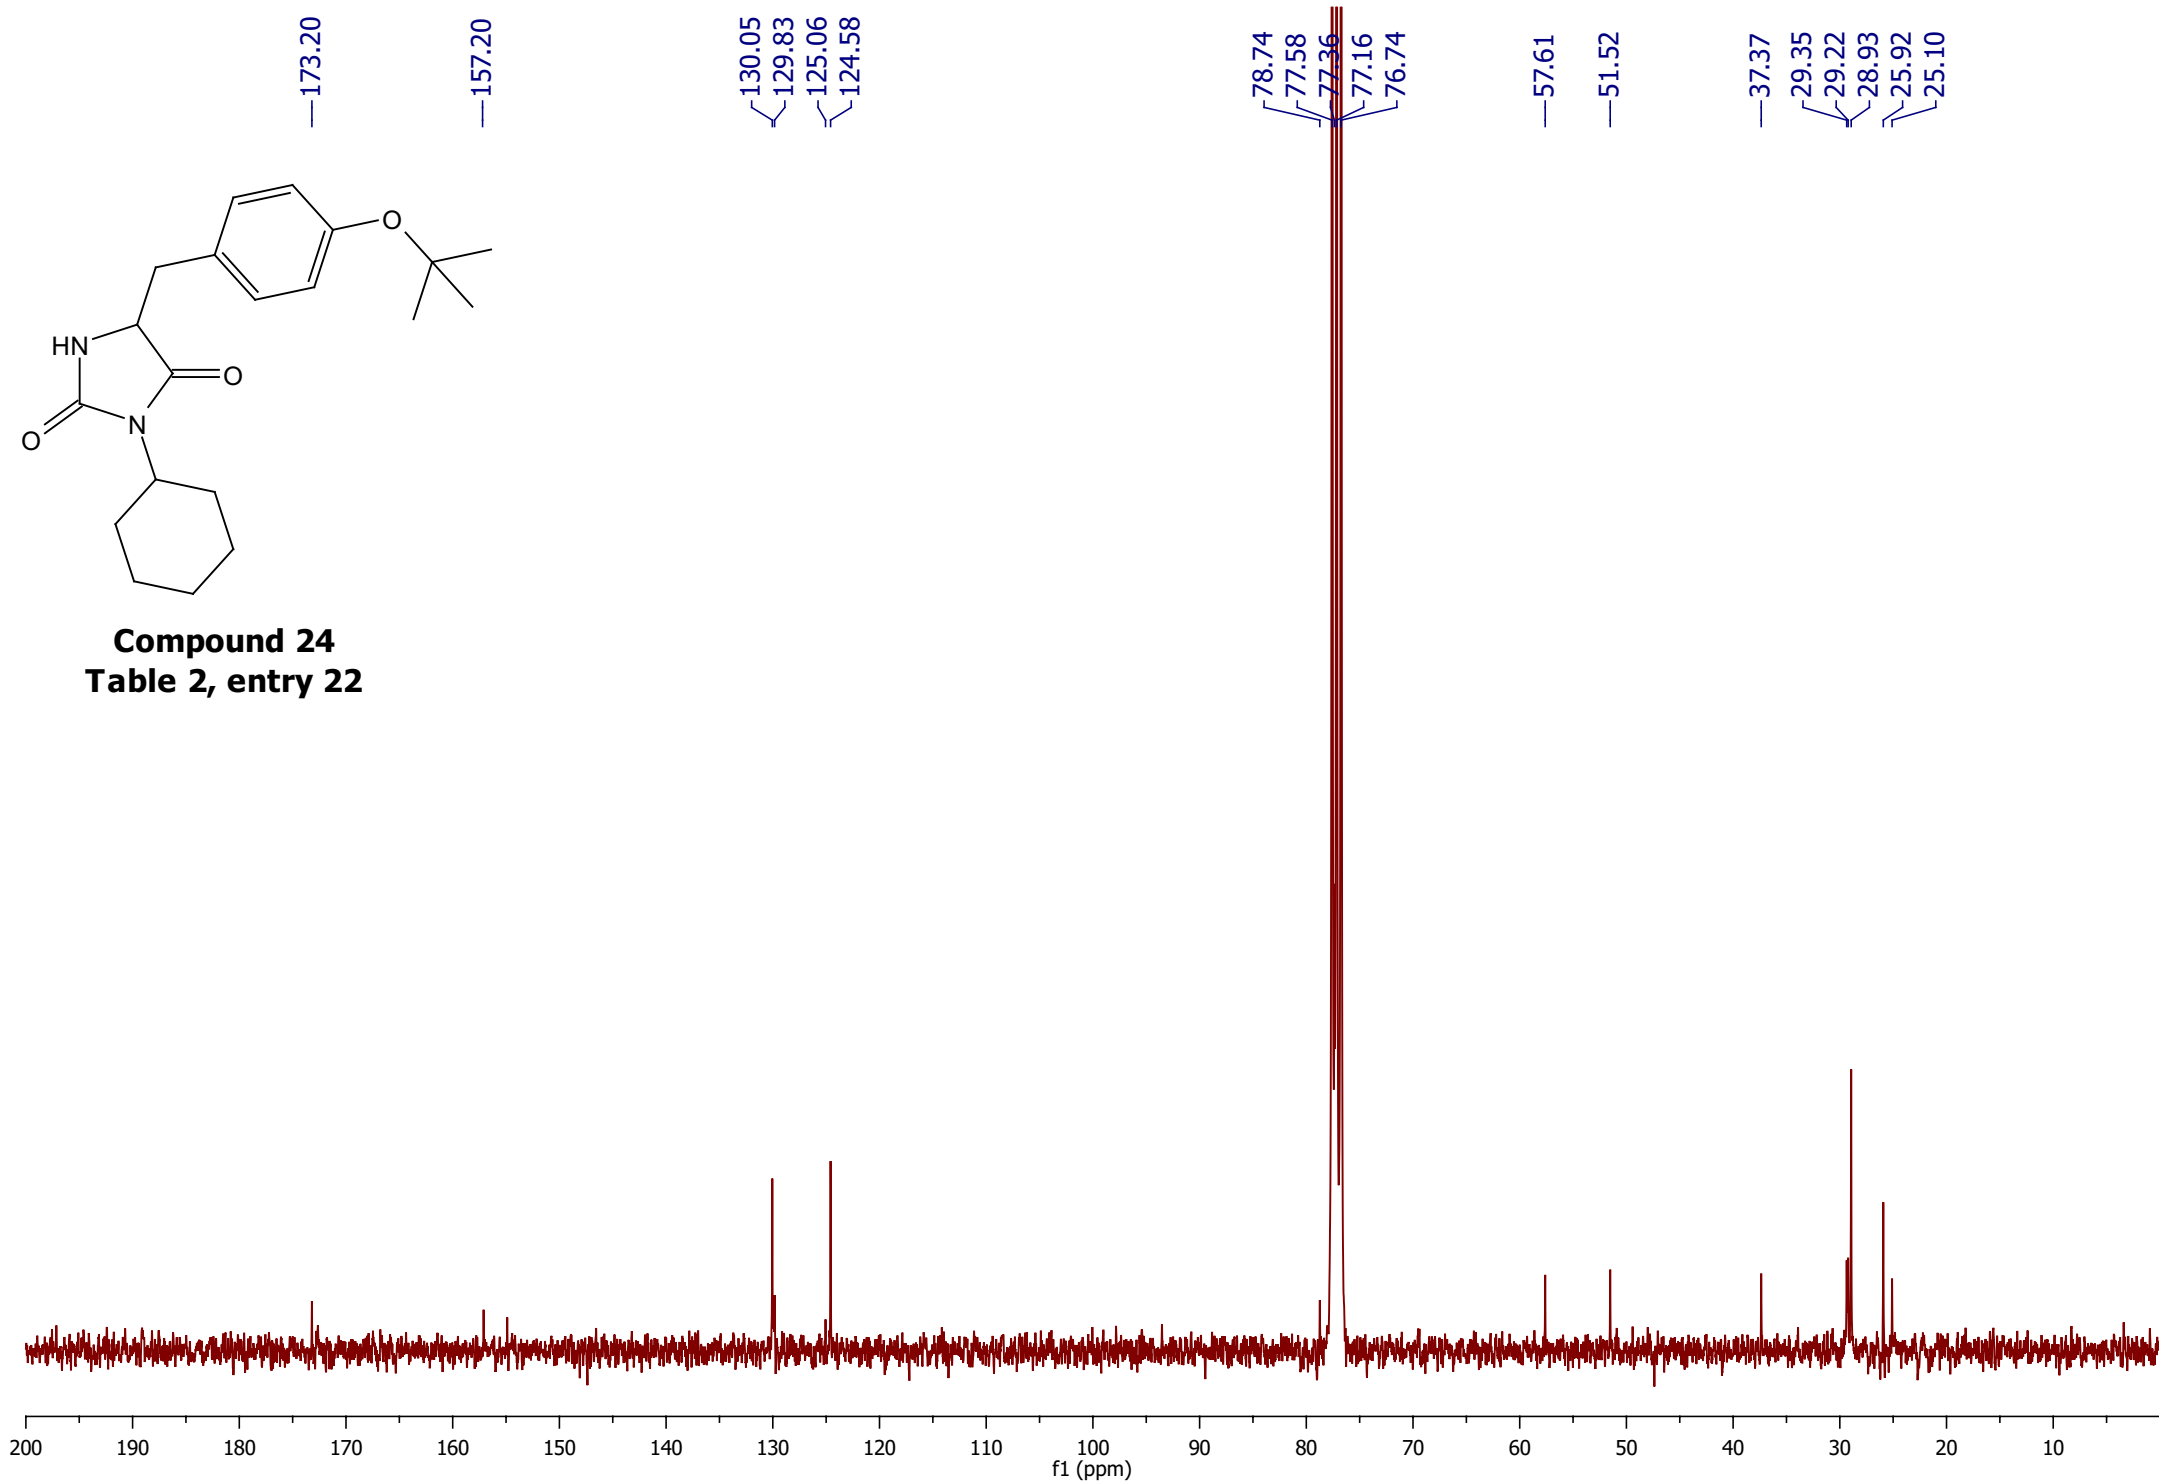

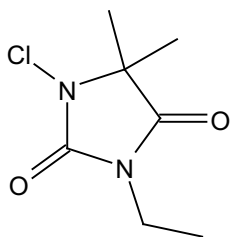

**Compound 25**  
**Scheme 2**

—2179.08

1095.96  
1088.76  
1081.56  
1074.37

475.70  
436.57  
374.47  
367.28  
360.08

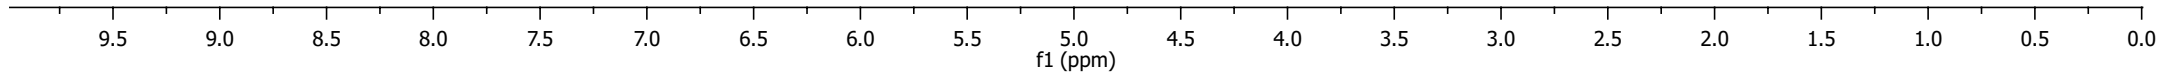

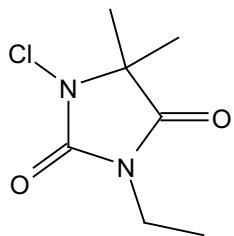

**Compound 25**  
**Scheme 2**

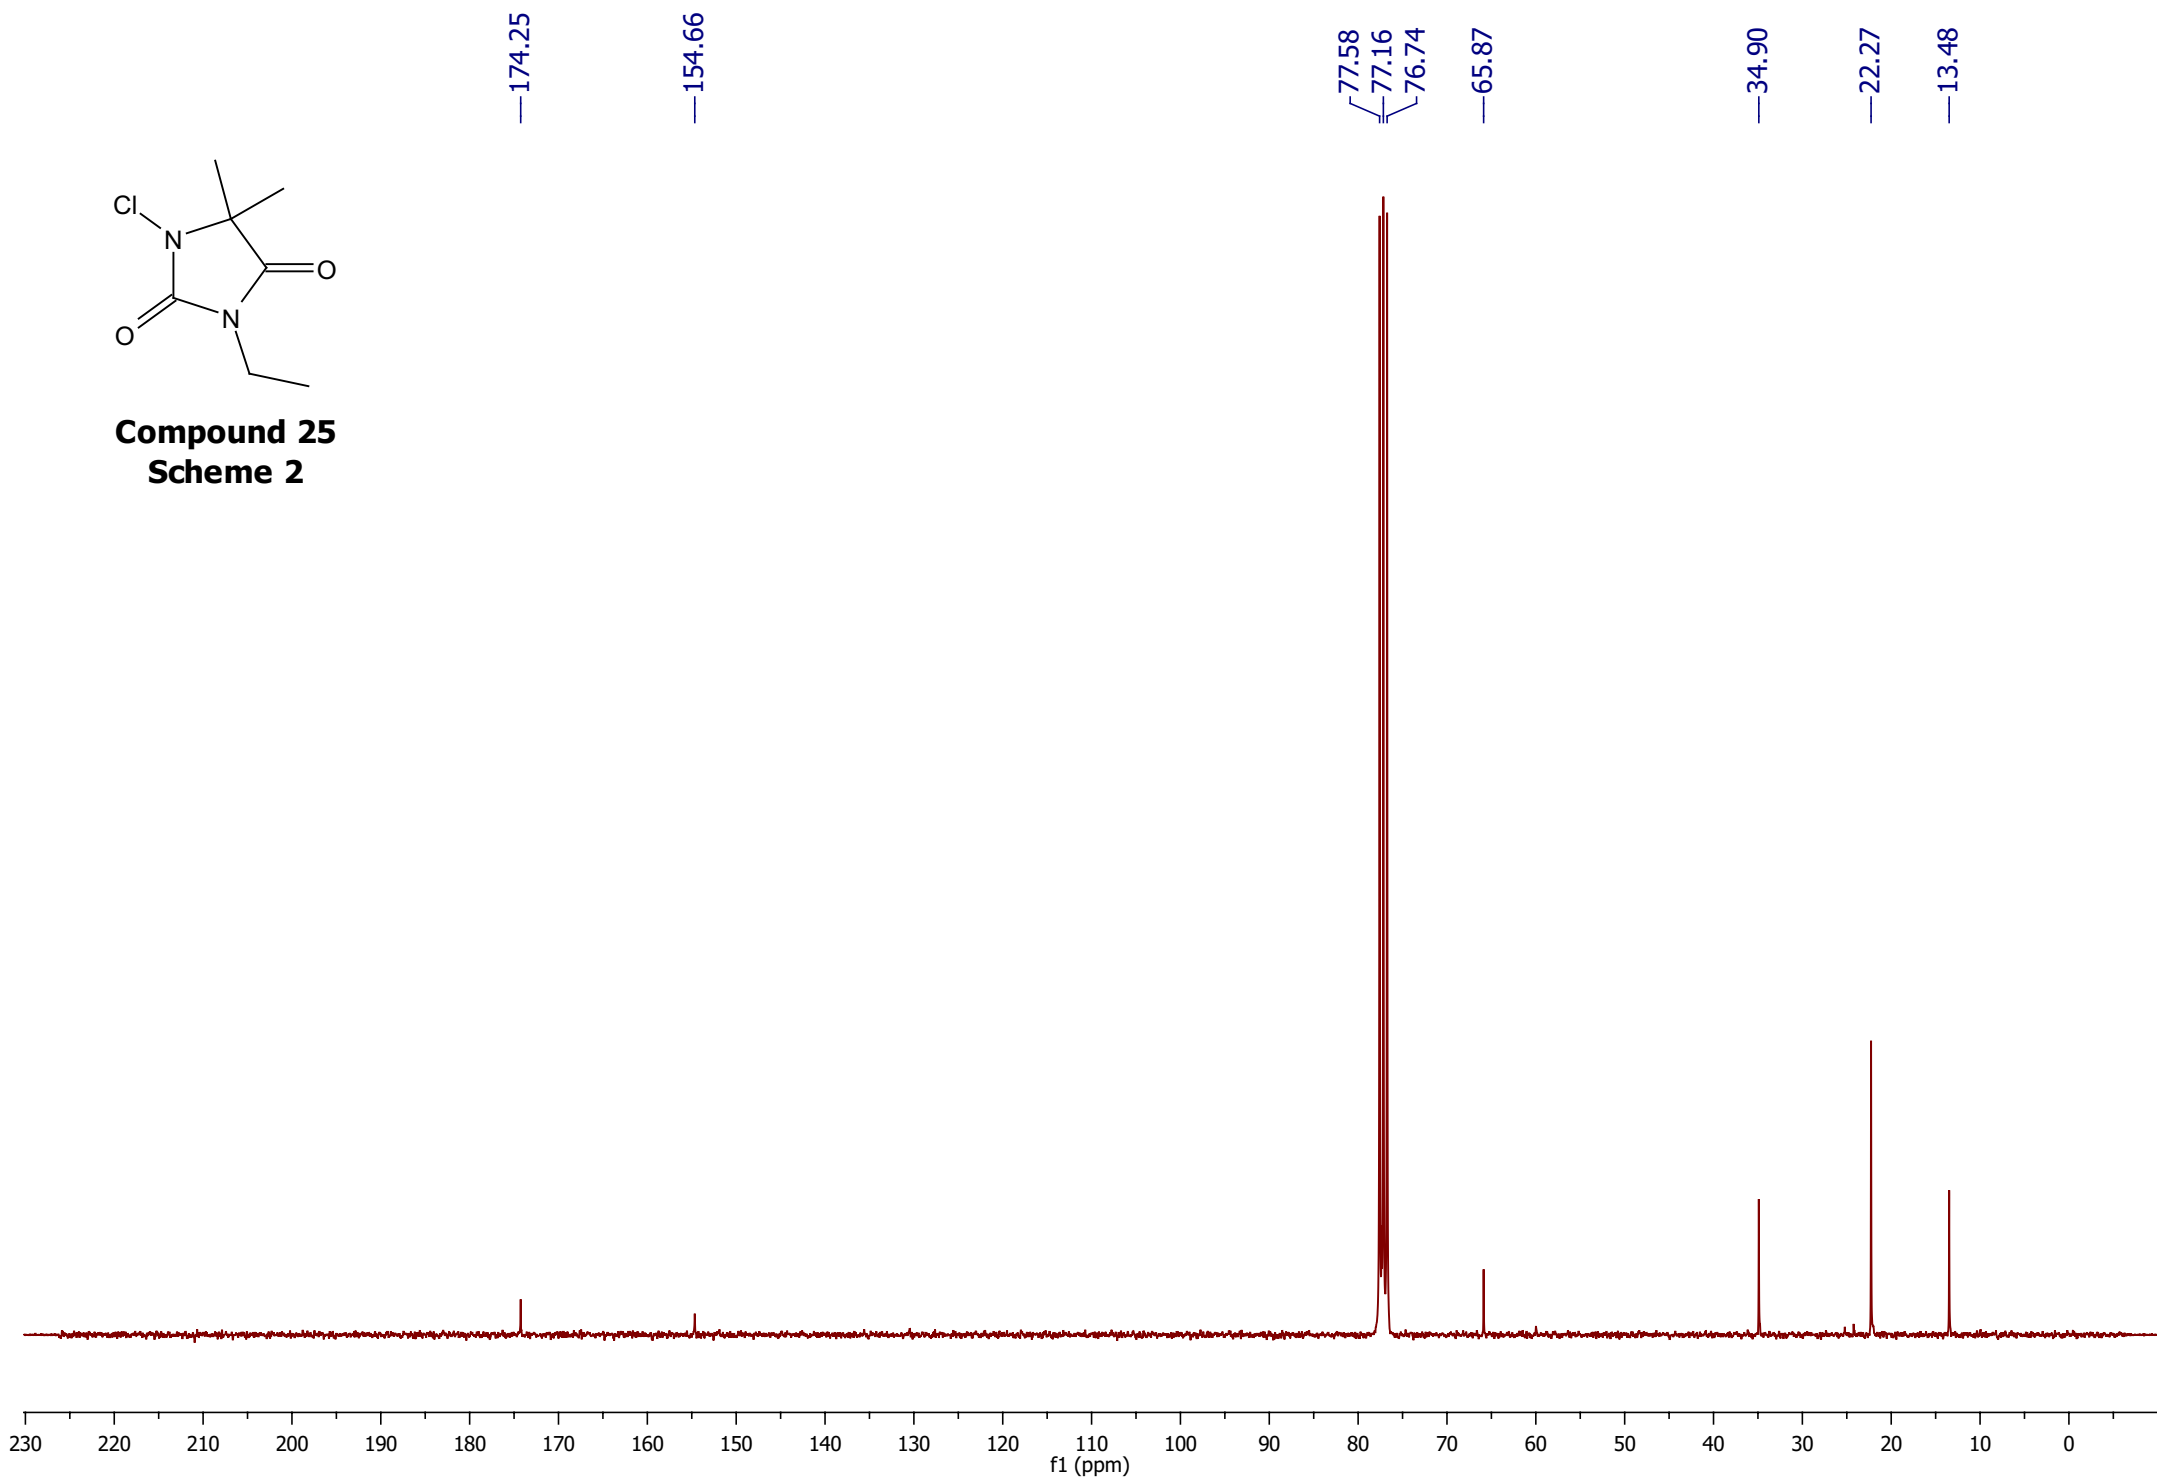

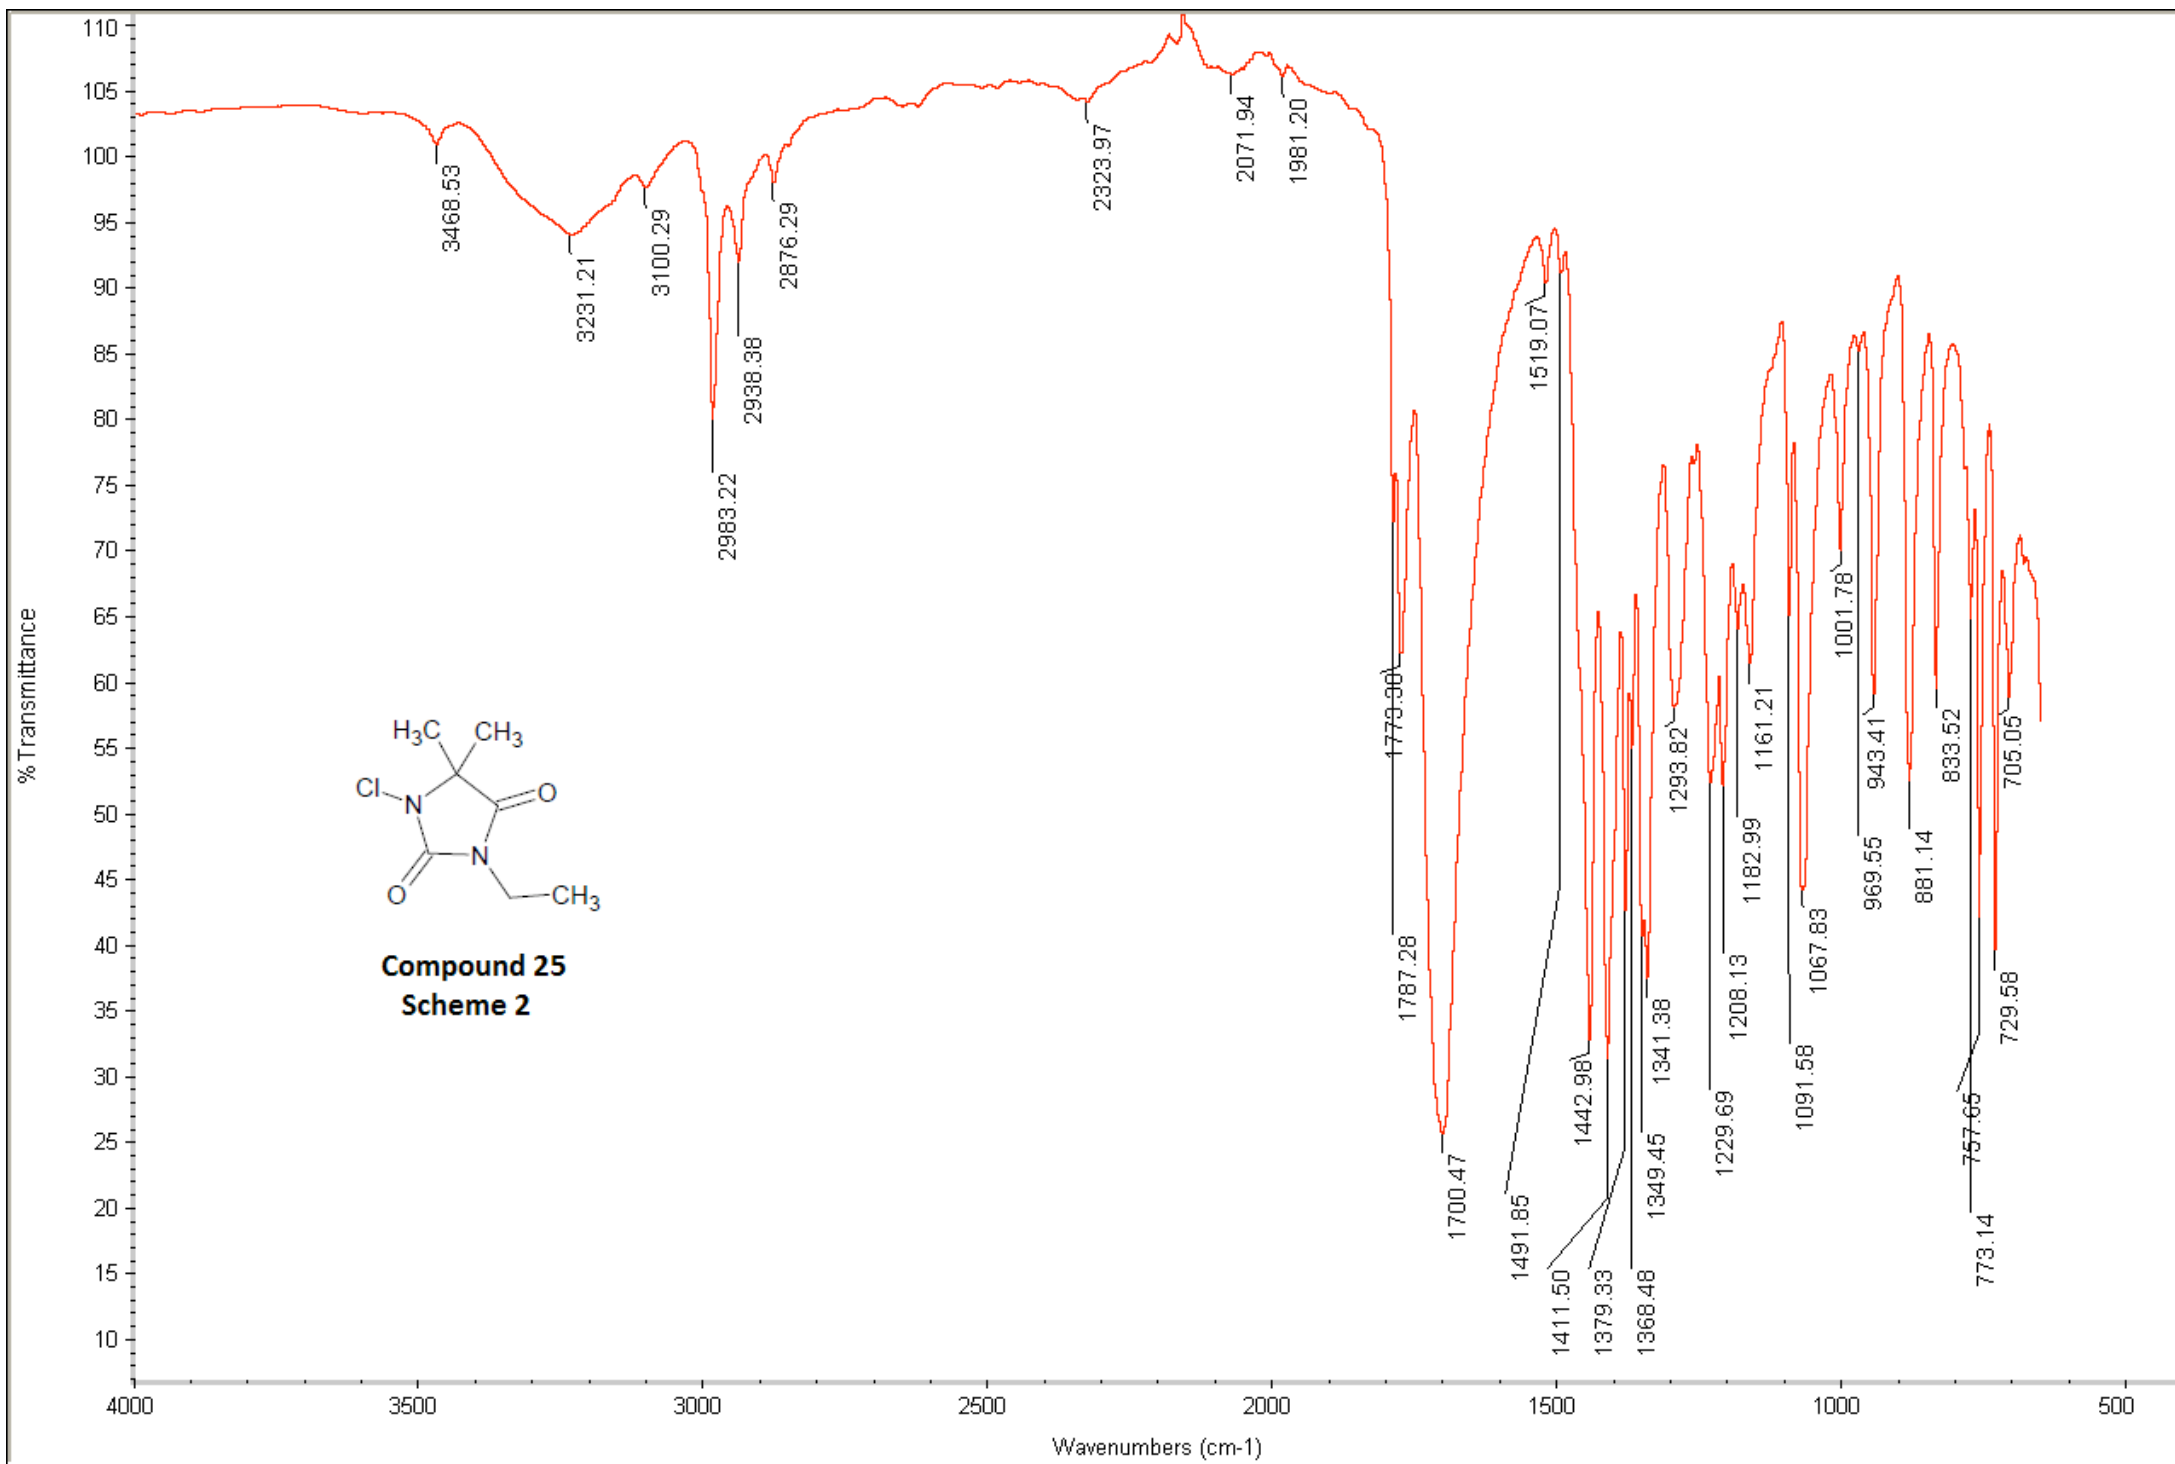



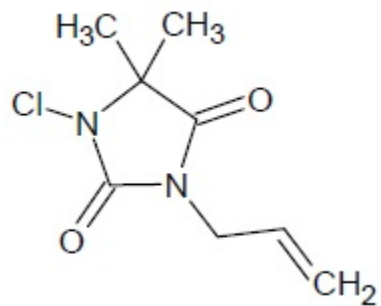

**Compound 26**  
**Scheme 2**

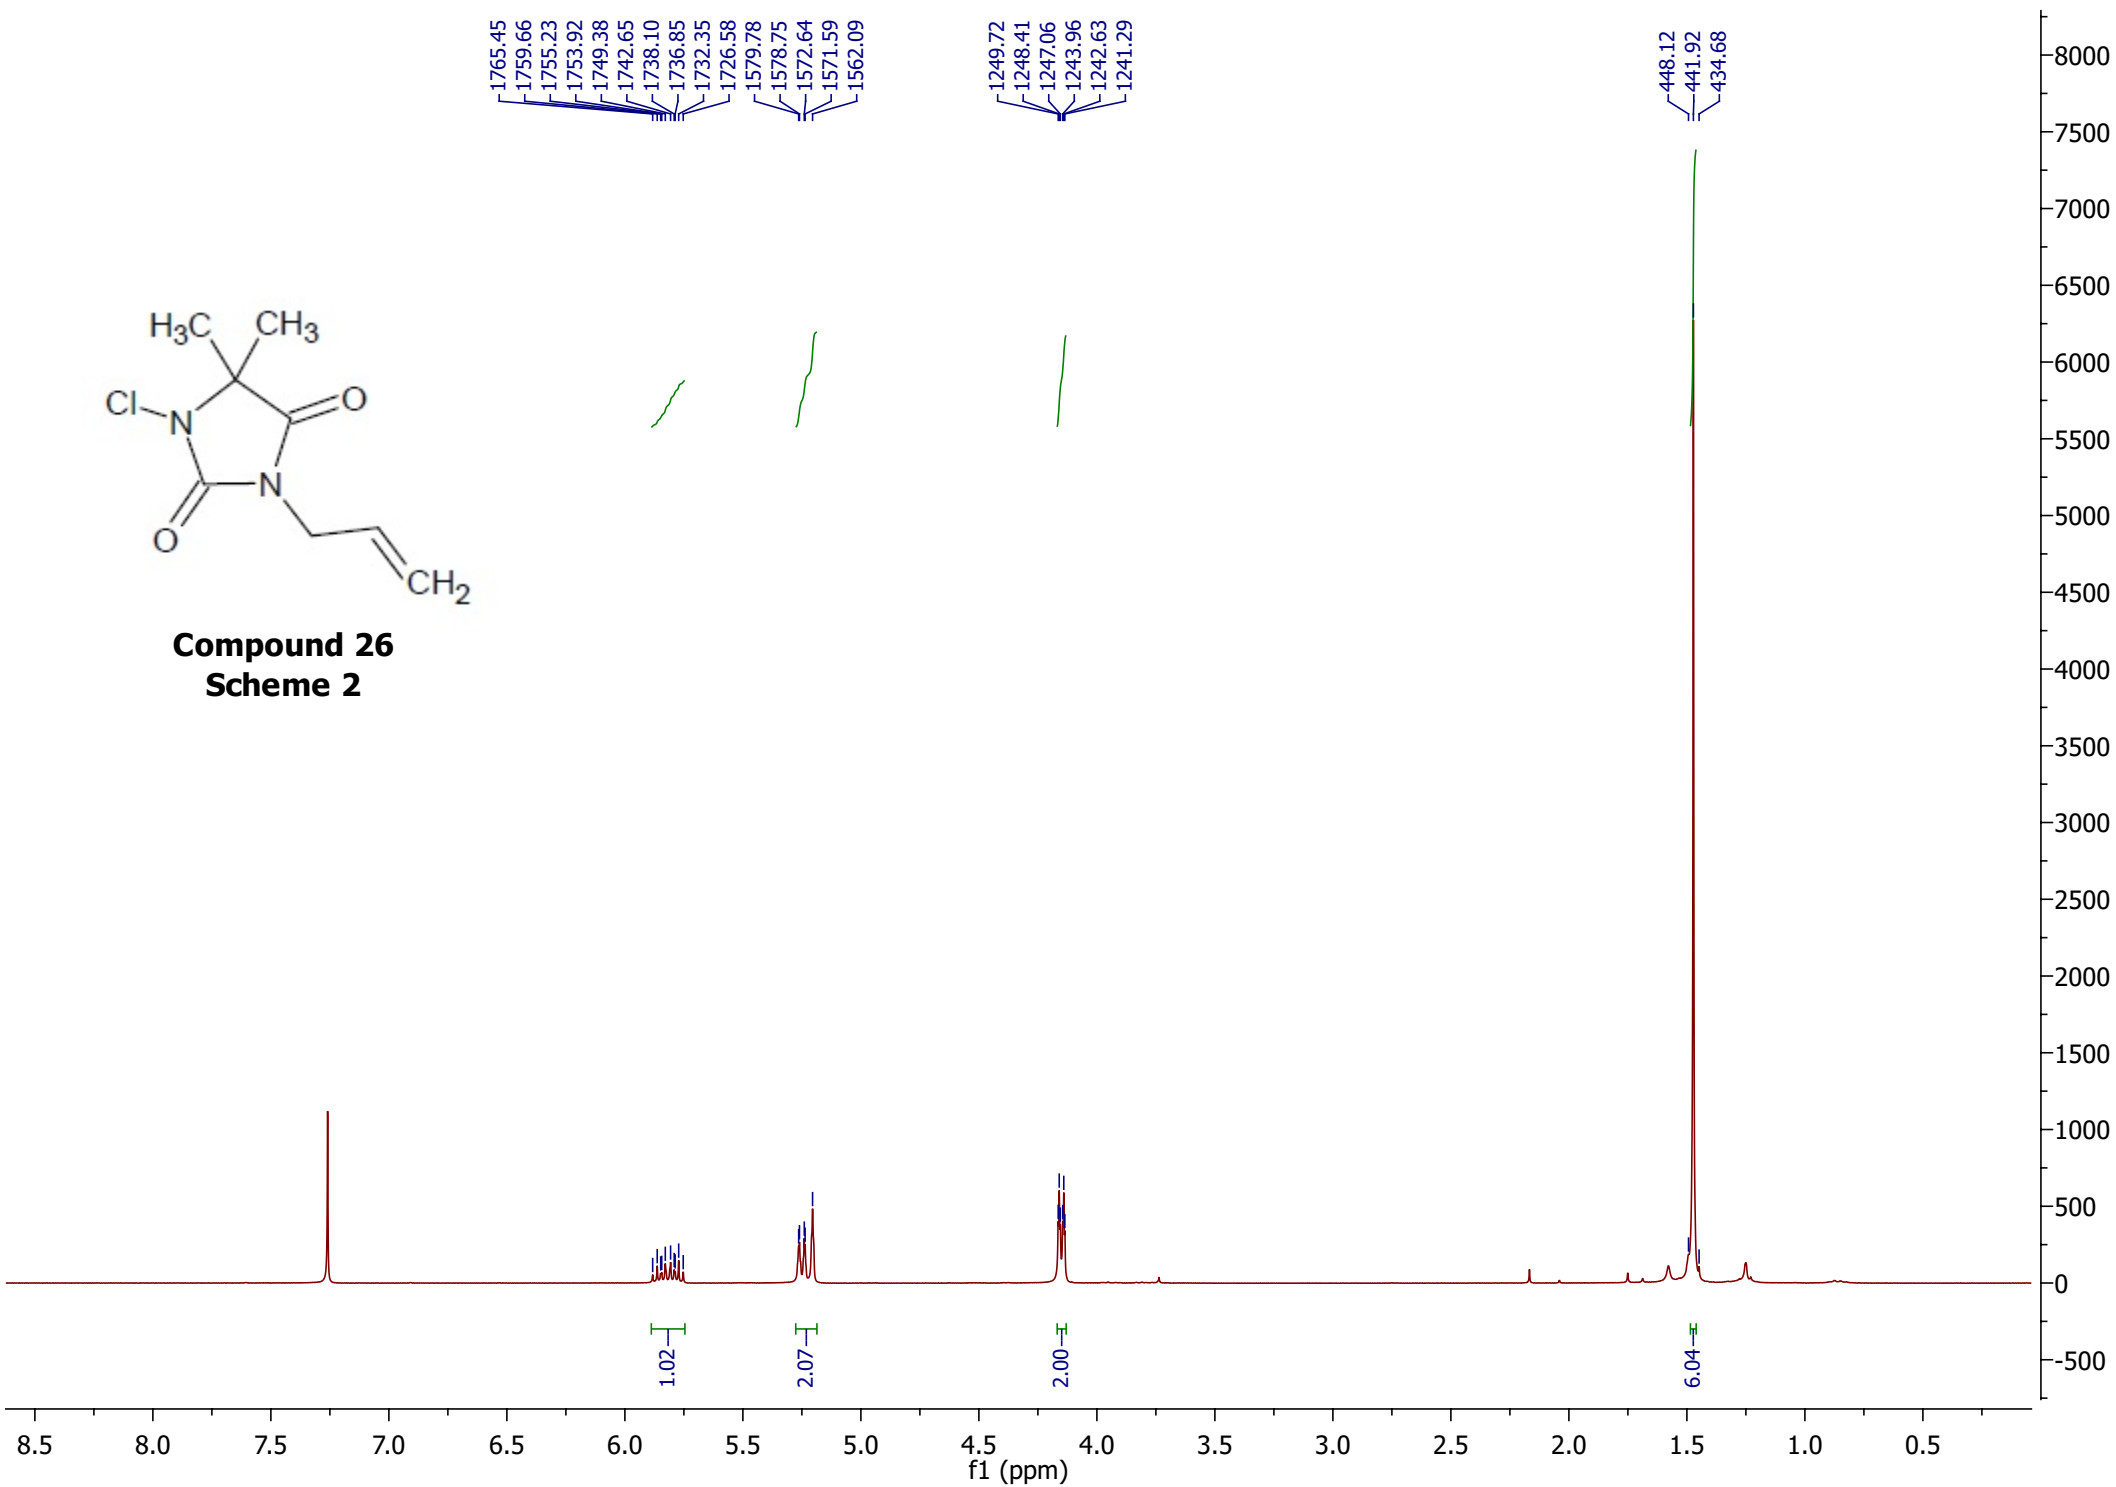

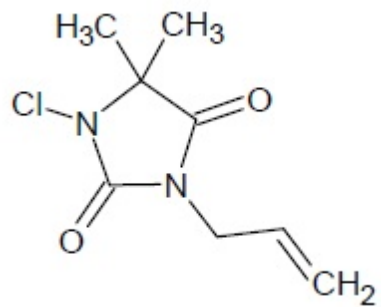

**Compound 26**  
**Scheme 2**

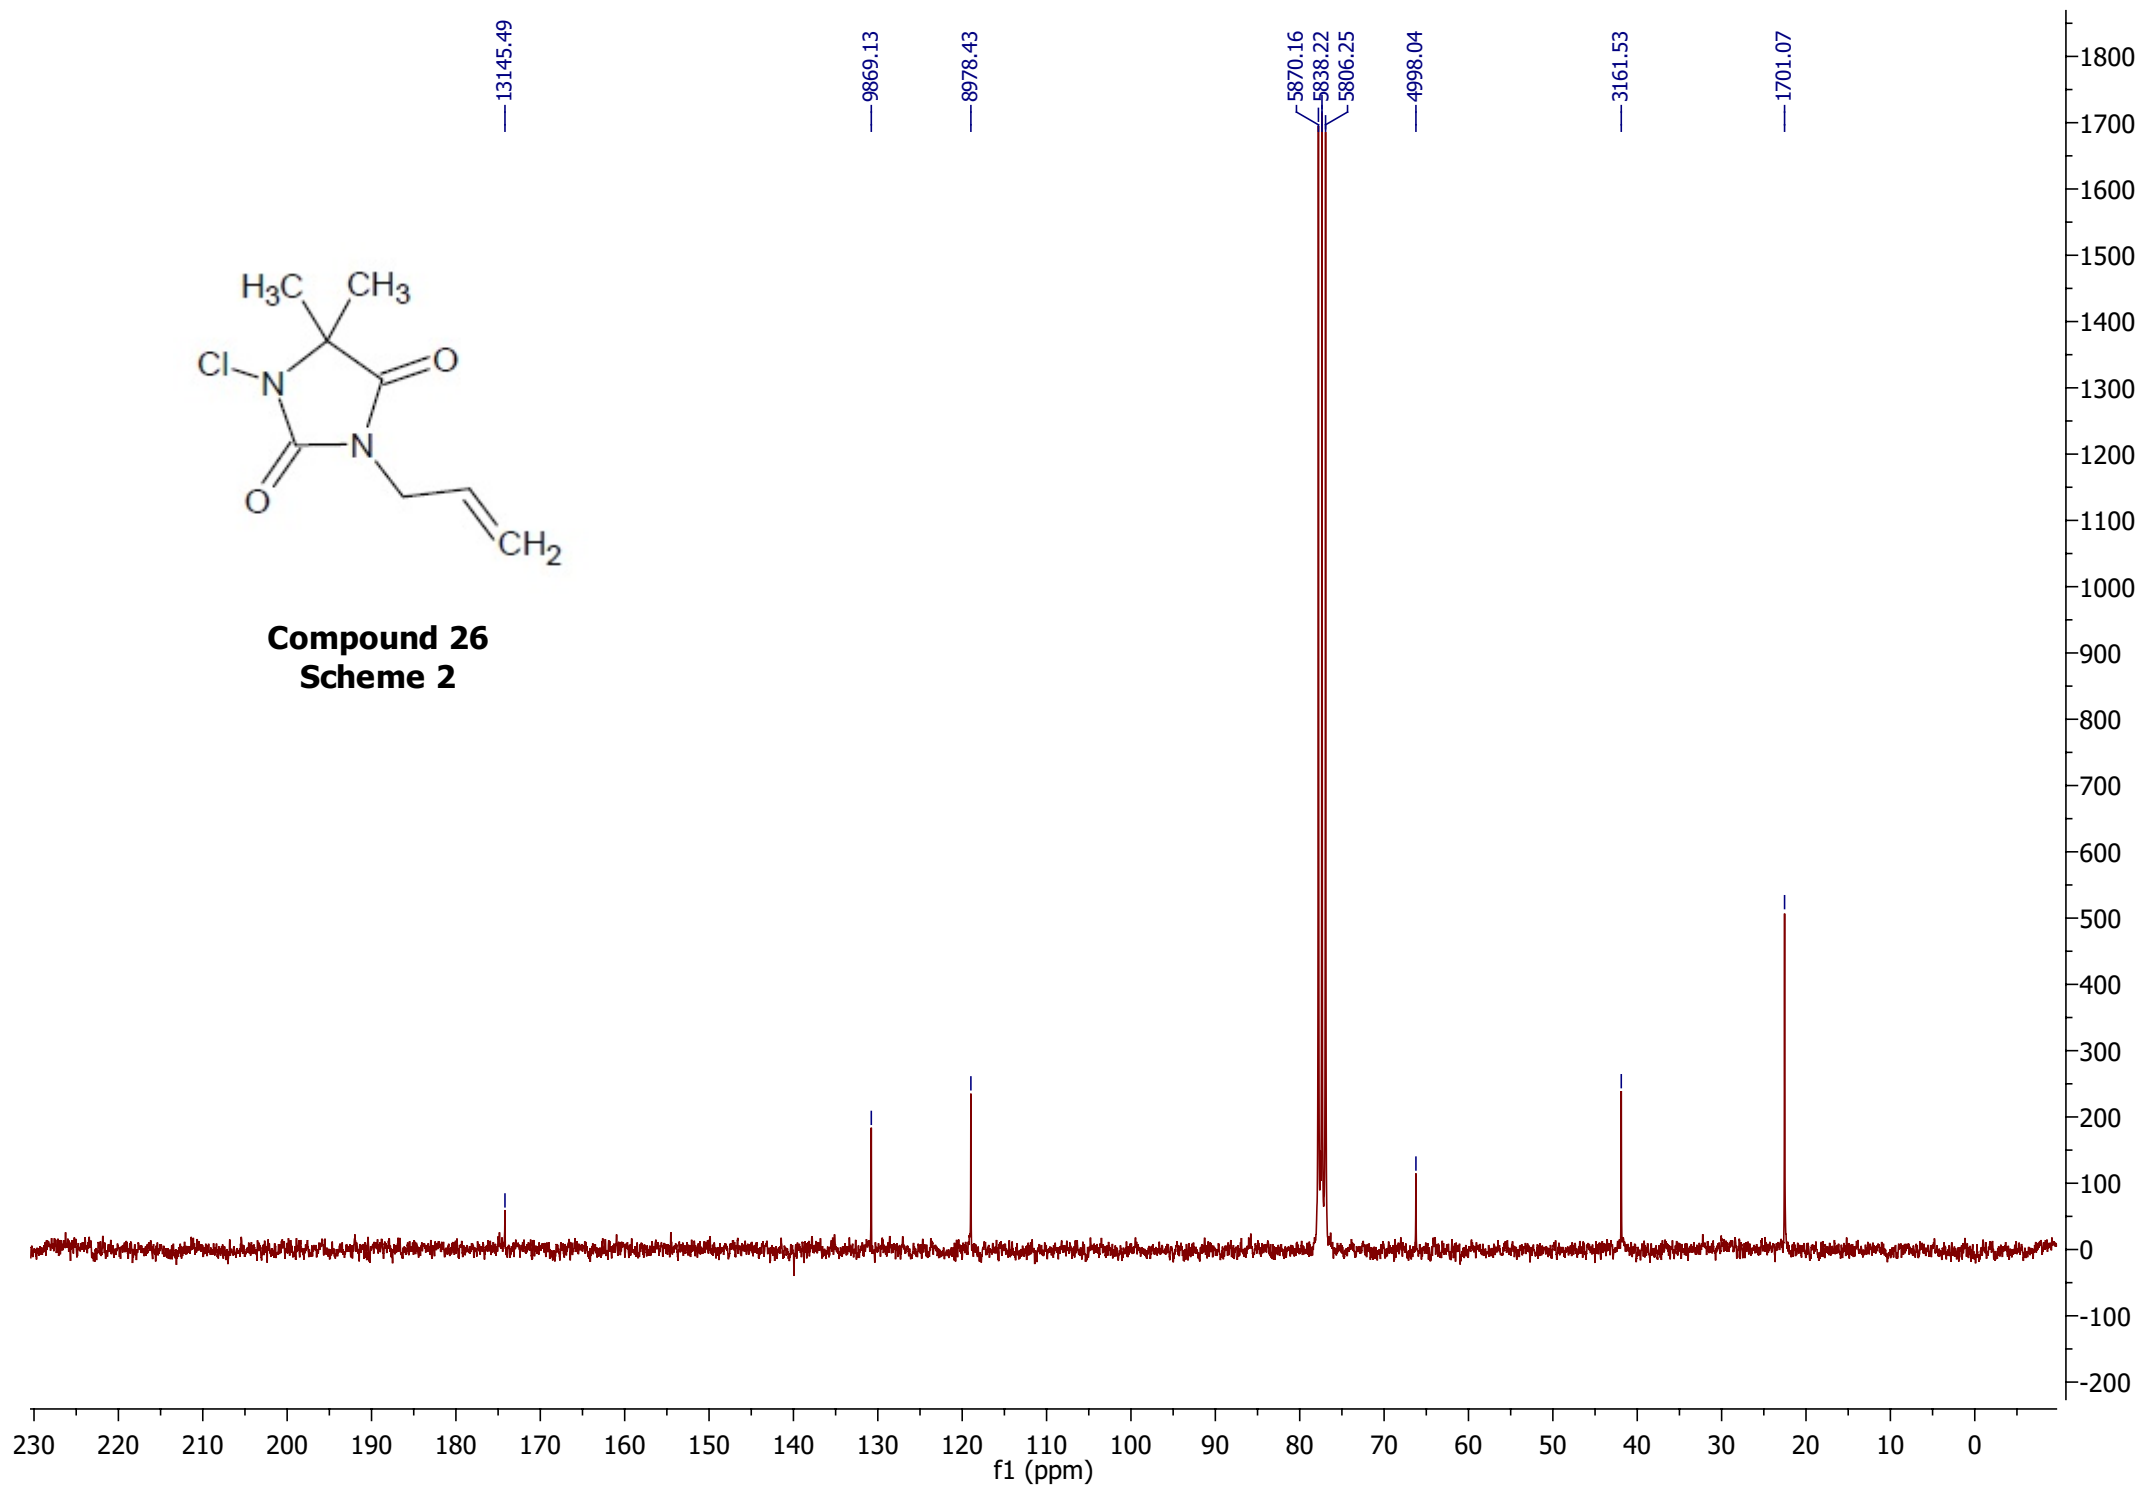

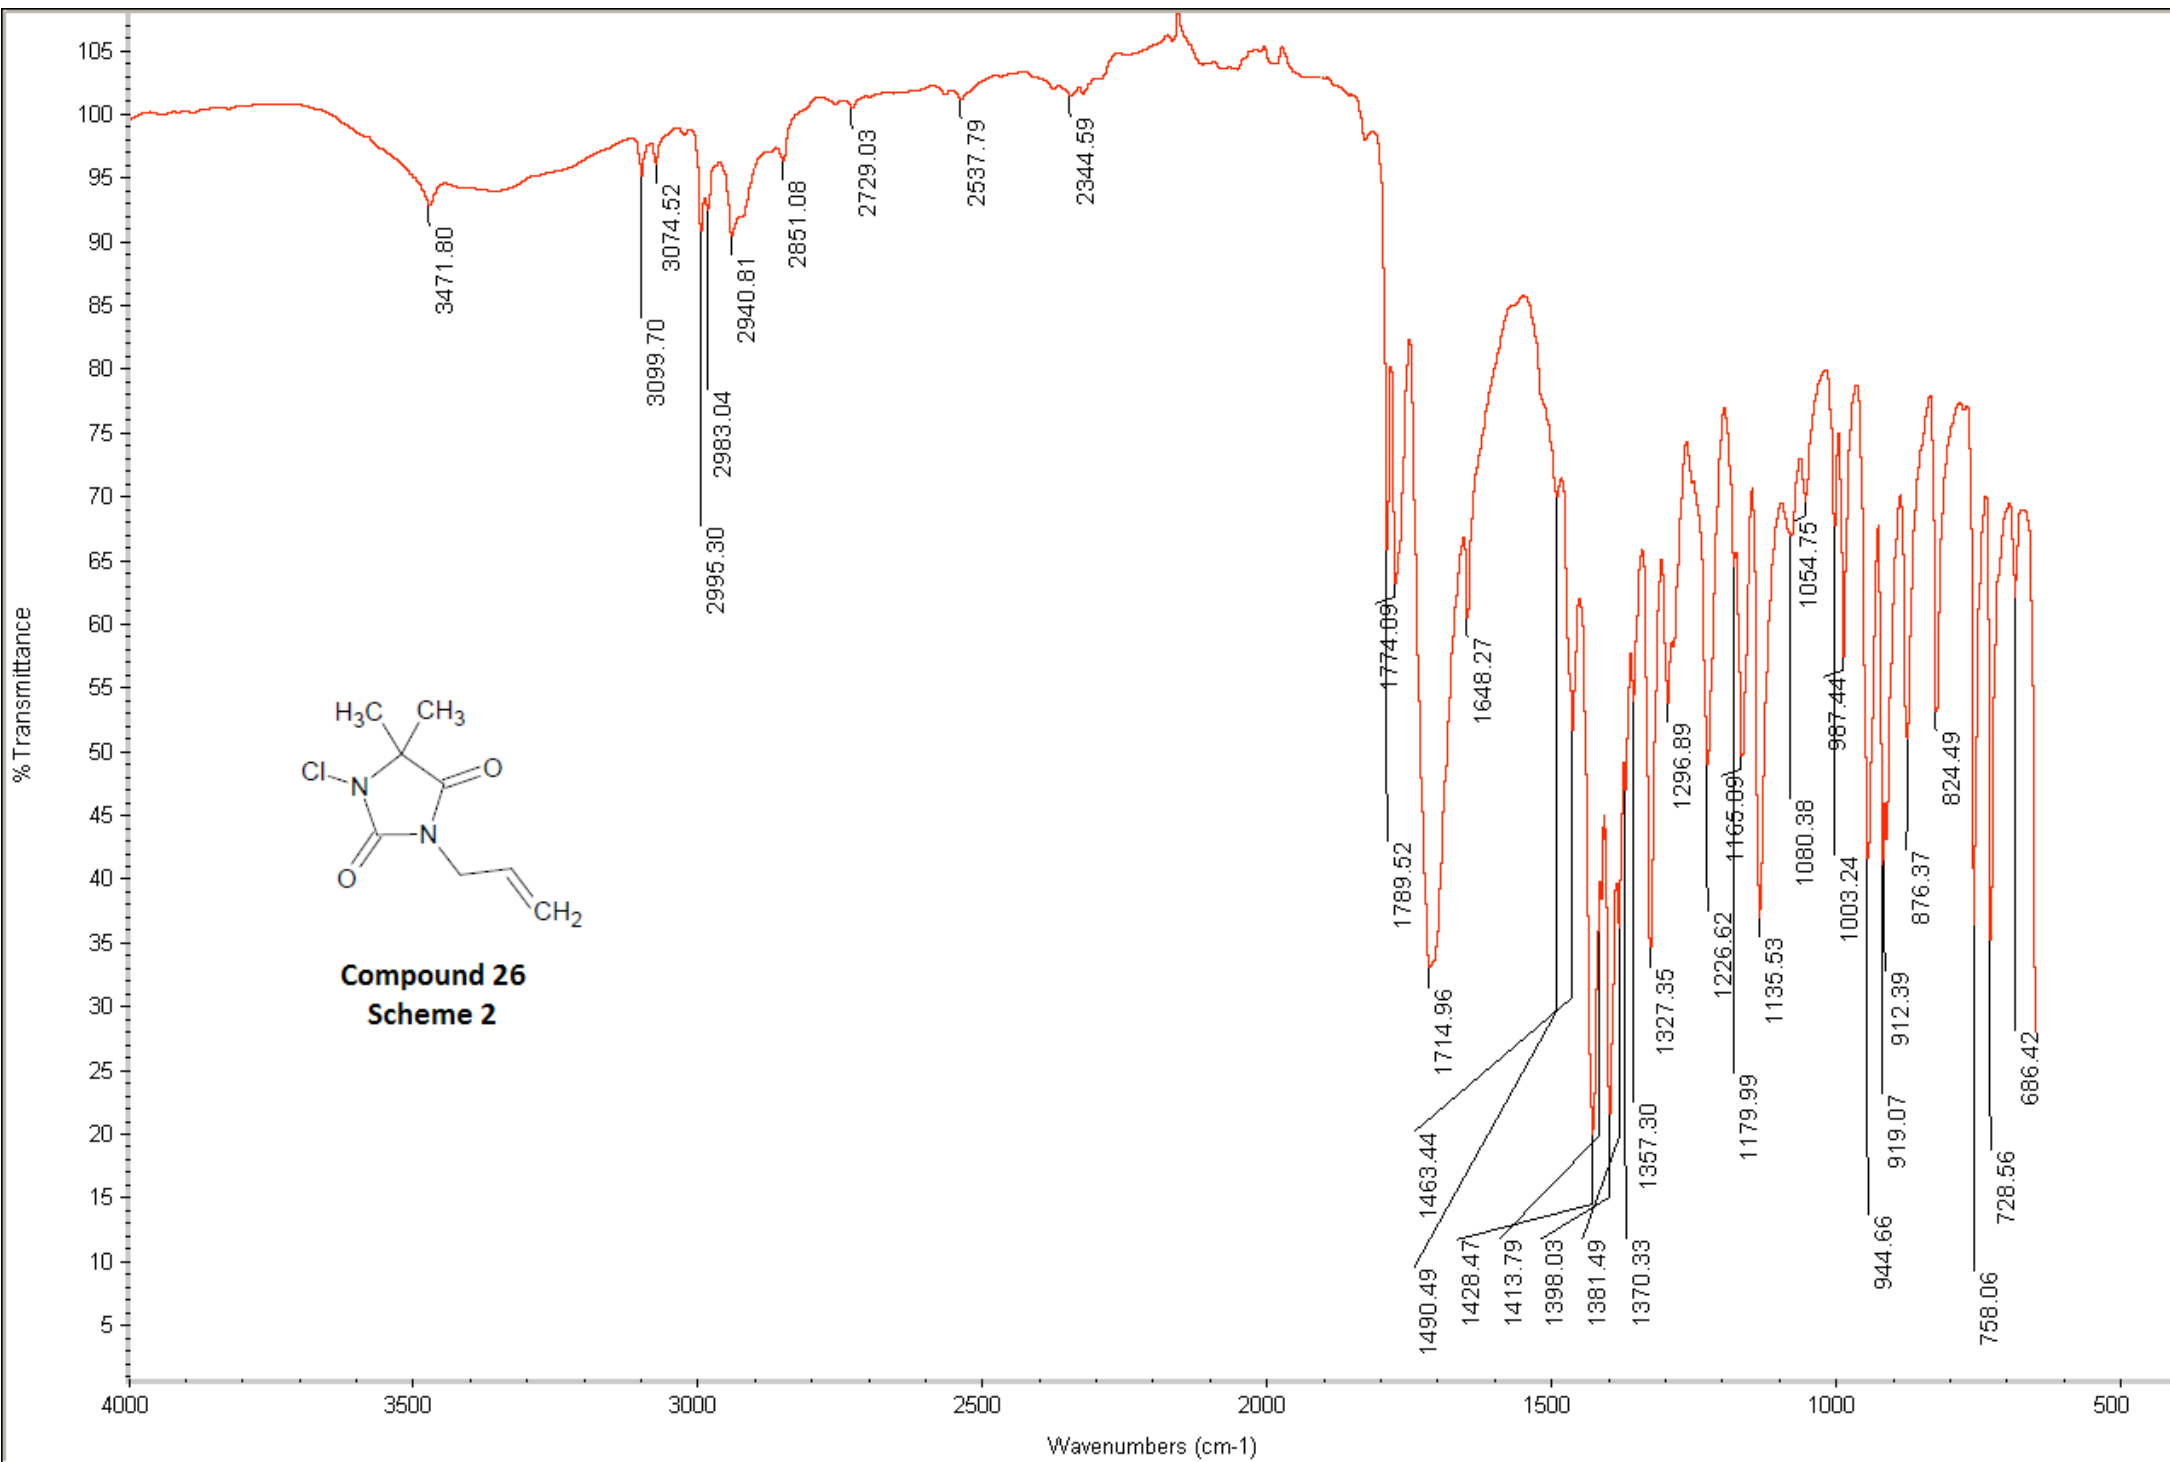

Supplement: c6ra03222b1.pdf [file c6ra03222b1.pdf]
